# Supplementary material for: Cyclocondensation reactions of racemic diastereomers of dimethyl-2-oxocyclohexanepropionic acids with (R)-phenylglycinol: access to both enantiomers of dimethylcis-decahydroquinolines
Source: Royal Society of Chemistry journal article supplement (doi:10.1039/d2qo01779b), 2022-12-14
Supplement: d2qo01779b1.pdf [file d2qo01779b1.pdf]

## Cyclocondensation reactions of racemic diastereomers of dimethyl-2-oxocyclohexanepropionic acids with (*R*)-phenylglycinol: access to both enantiomers of dimethyl *cis*-decahydroquinolines

Arnau Calbó, Rosa Griera, Joan Bosch, and Mercedes Amat\*

Laboratory of Organic Chemistry, Faculty of Pharmacy and Food Sciences, and Institute of Biomedicine (IBUB), University of Barcelona, 080028-Barcelona, Spain

E-mail: [amat@ub.edu](mailto:amat@ub.edu)

### Contents

- I) Experimental procedures and spectroscopic data: pages 1-14
- II) Supplementary schemes, figures and tables: pages 15-28
- III) Copies of <sup>1</sup>H and <sup>13</sup>C NMR spectra: pages 29-53
- IV) X- ray crystallographic data for compounds **7a,7b, 7d, 8a, 8b, 8d, 9a, 9b, 9c, and 9d**: pages 54-181

**I) Experimental procedures and spectroscopic data**

**General Procedures.** All air sensitive reactions were performed under a dry argon or nitrogen atmosphere with dry, freshly distilled solvents using standard procedures. For reactions that require heating, a hot plate magnetic stirrer with an aluminium heating block was used. Drying of organic extracts during the work-up of reactions was performed over anhydrous Na<sub>2</sub>SO<sub>4</sub> or MgSO<sub>4</sub>. Evaporation of solvent was accomplished with a rotatory evaporator. Thin-layer chromatography was done on SiO<sub>2</sub> (silica gel 60 F<sub>254</sub>), and the spots were located by UV and either a 1% KMnO<sub>4</sub> solution. Chromatography refers to flash column chromatography and was carried out on SiO<sub>2</sub> (silica gel 60, 230-400 mesh). NMR spectra were recorded at 400 or 500 MHz (<sup>1</sup>H) and 100.6 or 125 MHz (<sup>13</sup>C), and chemical shifts are reported in  $\delta$  values, in parts per million (ppm) relative to Me<sub>4</sub>Si (0 ppm) or relative to residual chloroform (7.26 ppm, 77.0 ppm) as an internal standard. Data are reported in the following manner: chemical shift, multiplicity (s = singlet, d = doublet, t = triplet, q = quartet, br = broad, m = multiplet), coupling constant (*J*) in hertz (Hz), integrated intensity, and assignment (when possible). Assignments and stereochemical determinations are given only when they are derived from definitive two-dimensional NMR experiments (HSQC-COSY). IR spectra were performed in a spectrophotometer Nicolet Avatar 320 FT-IR and only noteworthy IR absorptions (cm<sup>-1</sup>) are listed. Optical rotation were measured on Perkin-Elmer 241 polarimeter. [ $\alpha$ ]<sub>D</sub> values are given in 10<sup>-1</sup> deg cm<sup>2</sup> g<sup>-1</sup>. High resolution mass spectra (HMRS) were performed by *Centres Científics i Tecnològics de la Universitat de Barcelona* using an electrospray (ESI) ionization source and a TOF analyzer.

### 3,4-Dimethyl-2-oxocyclohexanepropionic acid (**4**):

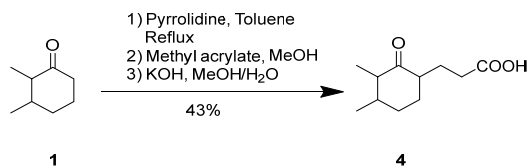

*First Step:* A solution of 2,3-dimethylcyclohexanone (racemic mixture of diastereomers; 4.44 g, 35.2 mmol) and pyrrolidine (5.11 g, 71.8 mmol) in toluene (10 mL) was heated at reflux temperature under Dean Stark conditions. After 15 h, the mixture was cooled and concentrated. Methyl acrylate (3.46 mL, 38.7 mmol) was added to a solution of the above residue in methanol (11 mL) and the mixture was stirred at reflux temperature for 4 h. Then, a buffer solution (15 mL, HOAc–H<sub>2</sub>O–NaOAc 25 mL:25 mL:12.5 g) was added and the reflux was continued for 1 h. After cooling to room temperature, the mixture was diluted with Et<sub>2</sub>O, and washed with 2 M aqueous HCl and brine. The organic phase was dried and concentrated.

*Second Step:* KOH (2.3 g, 34.8 mmol, 85%) was added to a solution of the above crude in MeOH–H<sub>2</sub>O (60 mL:30 mL), and the mixture was stirred at room temperature for 6 h. Then, the mixture was

washed with CH<sub>2</sub>Cl<sub>2</sub>. The combined aqueous extracts were acidified to pH 2-3 by addition of 2 M aqueous HCl and the mixture was extracted with CH<sub>2</sub>Cl<sub>2</sub>. The combined organic extracts were dried and concentrated to give a diastereomeric mixture of keto-acids **4** (3.01 g, 43% from **1**) as an off-white solid: mp 60-64 °C (hexane-CH<sub>2</sub>Cl<sub>2</sub>); IR (NaCl): 1701 (CO) cm<sup>-1</sup>; <sup>1</sup>H NMR (400 MHz, CDCl<sub>3</sub>, *g*-HSQC) δ 9.93 (br s, 1H, COOH); 2.43-2.50 (m, 1H); 2.41-2.31 (m, 2H), 2.11- 2.00 (m, 3H), 1.87-1.81 (m, 1H), 1.59-1.48 (m, 2H), 1.47-1.42 (m, 1H), 1.35 (qd, *J* = 12.8, 3.6 Hz, 1H), 1.05 (d, *J* = 6.2 Hz, 3H, CH<sub>3</sub>), 1.01 (d, *J* = 6.2 Hz, 3H, CH<sub>3</sub>); <sup>13</sup>C NMR (100.6 MHz, CDCl<sub>3</sub>) δ 213.5 (CO), 179.8 (CO<sub>2</sub>), 51.9 (CH), 49.1 (CH), 42.3 (CH), 34.4 (CH<sub>2</sub>), 33.5 (CH<sub>2</sub>), 31.6 (CH<sub>2</sub>), 24.5 (CH<sub>2</sub>), 20.6 (CH<sub>3</sub>), 11.6 (CH<sub>3</sub>); HRMS calcd for [C<sub>11</sub>H<sub>18</sub>O<sub>3</sub> – H<sup>+</sup>]: 197.1183; found 197.1187.

### 3,5-Dimethyl-2-oxocyclohexanepropionic acid (**5**):

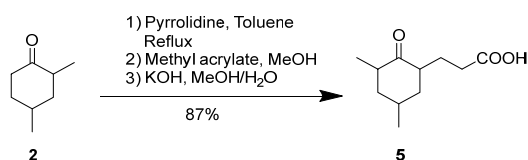

Operating as described in the preparation of keto-acids **4**, from pyrrolidine (1.7 mL, 21.2 mmol), 2,4-dimethylcyclohexanone (racemic mixture of diastereomers; 1.34 g, 10.6 mmol) in toluene (11 mL), methyl acrylate (0.95 mL, 10.6 mmol) in MeOH (14 mL), and KOH (772 mg, 11.7 mmol, 85%) in MeOH-H<sub>2</sub>O (24 mL:12 mL), a diastereomeric mixture of keto-acids **5** (1.83 g, 87%) was obtained as a colorless oil: IR (NaCl):1709 (CO) cm<sup>-1</sup>; <sup>1</sup>H NMR (400 MHz, CDCl<sub>3</sub>, *g*-HSQC) δ 7.85 (br s, 1H, COOH); 2.50-2.33 (m, 4H), 2.10-2.01 (m, 4H), 1.55-1.46 (m 1H), 1.16-1.06 (m, 2H), 1.00-0.95 (m, 6H, CH<sub>3</sub>); <sup>13</sup>C NMR (100.6 MHz, CDCl<sub>3</sub>) δ 214.1 (CO); 179.4 (CO<sub>2</sub>), 48.5 (CH), 45.3 (CH<sub>2</sub>), 44.5 (CH), 43.2 (CH<sub>2</sub>), 31.9 (CH), 31.8 (CH<sub>2</sub>), 24.4 (CH<sub>2</sub>), 21.1 (CH<sub>3</sub>), 14.3 (CH<sub>3</sub>); HRMS calcd for [C<sub>11</sub>H<sub>18</sub>O<sub>3</sub> – H<sup>+</sup>]: 197.1183; found 197.1191.

### 3,6-Dimethyl-2-oxocyclohexanepropionic acid (**6**):

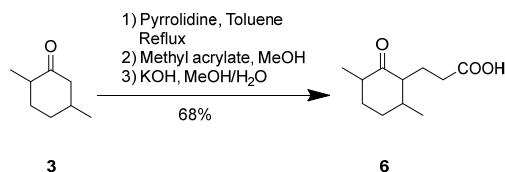

Operating as described in the preparation of keto-acids **4**, from pyrrolidine (3.96 g, 55.6 mmol), 2,5-dimethylcyclohexanone (racemic mixture of diastereomers; 3.51 g, 27.8 mmol) in toluene (25 mL), methyl acrylate (5 mL, 55.6 mmol) in MeOH (25 mL), and KOH (3.67 g, 55.6 mmol) in MeOH-H<sub>2</sub>O (72 mL:36 mL), a diastereomeric mixture of keto-acids **6** (3.75 g, 68% from **3**) was obtained as a yellowish oil: IR (NaCl): 1708 (CO) cm<sup>-1</sup>; <sup>1</sup>H NMR (400 MHz, CDCl<sub>3</sub>, *g*-HSQC) δ 9.45 (br s, OH)

2.62-2.21 (m, 3H), 2.11-1.81 (m, 4H), 1.69-1.28 (m, 3H), 0.75 and 0.98 and 1.08 [(d,  $J = 7.2$  Hz), (d,  $J = 6.4$  Hz) and (d,  $J = 4.0$  Hz), 6H, 2CH<sub>3</sub>]; <sup>13</sup>C NMR (100.6 MHz, CDCl<sub>3</sub>) δ 213.6 (CO), 179.7 (COO), 56.0 (CH), 45.1 (CH), 39.9 (CH), 37.1 (CH<sub>2</sub>), 35.5 (CH<sub>2</sub>), 34.5 (CH<sub>2</sub>), 20.9 (CH<sub>2</sub>), 20.4 (CH<sub>3</sub>), 14.3 (CH<sub>3</sub>); HRMS calcd for [C<sub>11</sub>H<sub>18</sub>O<sub>3</sub> + H<sup>+</sup>]: 199.1329; found 197.1332.

**(3*R*,7*aR*,10*R*,11*S*,11*aR*)-10,11-Dimethyl-5-oxo-3-phenyldecahydrooxazolo[2,3-*j*]quinoline (7*a*) and its (3*R*,7*aS*,10*S*,11*R*,11*aS*), (3*R*,7*aR*,10*R*,11*R*,11*aR*) and (3*R*,7*aS*,10*R*,11*R*,11*aR*) isomers (7*b*, 7*c* and 7*d*, respectively):**

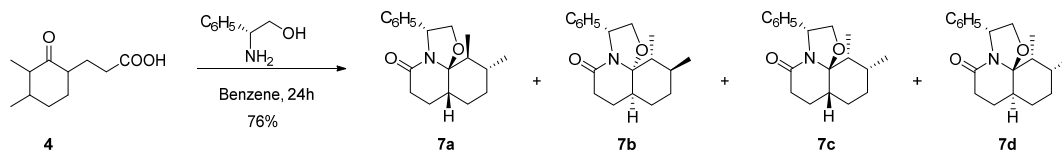

(*R*)-phenylglycinol (2.99 g, 21.8 mmol) was added to a solution of a diastereomeric mixture of keto-acids **4** (2.88 g, 14.53 mmol) in benzene (150 mL). The mixture was heated at reflux under Dean Stark conditions for 24 h. After cooling, the solvent was evaporated and the resulting residue was suspended in EtOAc. The organic solution was washed with saturated aqueous NaHCO<sub>3</sub>, dried and evaporated. Flash chromatography (9:1 to 1:1 hexane–EtOAc) afforded lactams **7a** (1.21 g, 28%), **7b** (1.32 g, 30%), **7c** (0.41 g, 10%), and **7d** (0.36 g, 8%) as colorless solids (**7c** as a colorless gum). **7a**: mp: 71-75 °C (hexane–CH<sub>2</sub>Cl<sub>2</sub>); [ $\alpha$ ]<sub>D</sub><sup>23</sup> – 181.4 (*c* 1.00, CHCl<sub>3</sub>); IR (NaCl): 1654 (CO) cm<sup>-1</sup>; <sup>1</sup>H NMR (400 MHz, CDCl<sub>3</sub>, COSY, *g*-HSQC) δ 7.39-7.36 (m, 2H, ArH), 7.34-7.29 (m, 2H, ArH), 7.25-7.21 (m, 1H, ArH), 5.48 (dd,  $J = 7.4, 4.2$  Hz, 1H, H-3), 4.36 (dd,  $J = 9.2, 4.2$  Hz, 1H, H-2), 4.21 (dd,  $J = 9.2, 7.4$  Hz, 1H, H-2), 2.56-2.52 (m, 2H, H-6), 2.02-1.85 (m, 3H, H-7, H-7*a* and H-8), 1.82-1.75 (m, 1H, H-7), 1.55-1.39 (m, 4H, H-8, H-9, H-10 and H-11), 1.33-1.22 (m, 1H, H-9), 0.87 (d,  $J = 6.4$  Hz, 3H, CH<sub>3</sub>-C-11), 0.56 (d,  $J = 6.8$  Hz, 3H, CH<sub>3</sub>-C-11); <sup>13</sup>C NMR (100.6 MHz, CDCl<sub>3</sub>) δ 172.4 (CO), 139.2 (*C<sub>q</sub>*-Ar), 128.2 (CH-Ar), 127.1 (CH-Ar), 127.1 (CH-Ar), 99.3 (C-11*a*), 68.1 (C-2), 59.2 (C-3), 42.0 (C-11), 38.7 (C-7*a*), 35.1 (C-10), 29.0 (C-6), 28.9 (C-9), 26.1 (C-8), 20.3 (CH<sub>3</sub>-C-10), 19.3 (C-7), 13.0 (CH<sub>3</sub>-C-11); HRMS calcd for [C<sub>19</sub>H<sub>25</sub>NO<sub>2</sub> + H<sup>+</sup>]: 300.1958; found 300.1960. **7b**: mp: 92-95 °C (hexane–CH<sub>2</sub>Cl<sub>2</sub>); [ $\alpha$ ]<sub>D</sub><sup>23</sup> + 43.2 (*c* 1.02, CHCl<sub>3</sub>); IR (NaCl): 1654 (CO) cm<sup>-1</sup>; <sup>1</sup>H NMR (400 MHz, CDCl<sub>3</sub>, COSY, *g*-HSQC) δ 7.33-7.21 (m, 5H, ArH), 5.07 (dd,  $J = 7.6, 4.0$  Hz, 1H, H-3), 4.55 (dd,  $J = 8.6, 7.6$  Hz, 1H, H-2), 3.91 (dd,  $J = 8.6, 4.0$  Hz, 1H, H-2), 2.44-2.31 (m, 2H, H-6), 2.23-2.16 (m, 1H, H-7*a*), 2.14-2.04 (m, 1H, H-8), 1.97-1.87 (m, 1H, H-7), 1.83-1.76 (m, 1H, H-7), 1.70-1.46 (m, 4H, H-8, H-9, H-10 and H-11), 1.35-1.24 (m, 1H, H-9), 1.02 (d,  $J = 6.8$  Hz, 3H, CH<sub>3</sub>), 0.94 (d,  $J = 6.8$  Hz, 3H, CH<sub>3</sub>-C-11); <sup>13</sup>C NMR (100.6 MHz, CDCl<sub>3</sub>) δ 168.3 (CO), 141.3 (*C<sub>q</sub>*-Ar), 127.4 (CH-Ar), 128.5 (CH-Ar), 126.6 (CH-Ar), 97.6 (C-11*a*), 74.9 (C-2), 62.0 (C-3), 44.9 (C-11), 40.2 (C-7*a*), 35.0 (C-10), 29.5 (C-6), 29.1 (C-9), 26.5 (C-8), 20.9 (C-7), 20.0 (CH<sub>3</sub>-C-11), 13.1 (CH<sub>3</sub>-C-10); HRMS

calcd for  $[C_{19}H_{25}NO_2 + H^+]$ : 300.1958; found 300.1950. **7c**: IR (NaCl): 1658 (CO)  $cm^{-1}$ ;  $^1H$  NMR (400 MHz,  $CDCl_3$ , COSY,  $g$ -HSQC)  $\delta$  7.36-7.31 (m, 3H, ArH), 7.29-7.27 (m, 1H, ArH), 7.25-7.23 (m, 1H, ArH), 5.39-5.33 (m, 1H, H-3), 4.45-4.41 (m, 1H, H-2), 3.95-3.91 (m, 1H, H-2), 2.70-2.63 (m, 1H, H-6), 2.58-2.47 (m, 1H, H-6), 2.20-1.96 (m, 3H, H-7, H-8 and H-10), 1.90-1.77 (m, 2H, H-7a and H-11), 1.69-1.58 (m, 2H, H-7 and H-8), 1.45-1.35 (m, 1H, H-9), 1.31-1.25 (m, 1H, H-9), 1.01 (d,  $J = 7.6$  Hz, 3H,  $CH_3$ ), 0.86 (d,  $J = 6.8$  Hz, 3H,  $CH_3$ );  $^{13}C$  NMR (100.6 MHz,  $CDCl_3$ )  $\delta$  171.3 (CO), 140.0 ( $Cq$ -Ar), 126.0 (CH-Ar), 128.5 (CH-Ar), 127.2 (CH-Ar), 97.8 (C-11a), 69.1 (C-2), 60.1 (C-3), 39.2 (C-7a and C-11), 31.6 (C-10), 30.4 (C-6), 27.8 (C-8), 22.8 (C-9), 22.2 (C-7), 19.4 ( $CH_3$ -C-10), 10.4 ( $CH_3$ -C-11); HRMS calcd for  $[C_{19}H_{25}NO_2 + H^+]$ : 300.1958; found 300.1958. **7d**: mp: 87-92 °C (hexane- $CH_2Cl_2$ );  $[\alpha]^{23}_D - 181.5$  ( $c$  1.00,  $CHCl_3$ ); IR (NaCl): 1664 (CO)  $cm^{-1}$ ;  $^1H$  NMR (400 MHz,  $CDCl_3$ , COSY,  $g$ -HSQC)  $\delta$  7.34-7.30 (m, 2H, ArH), 7.27-7.25 (m, 1H, ArH), 7.23-7.21 (m, 2H, ArH), 5.63 (dd,  $J = 8.8, 6.4$  Hz, 1H, H-3), 4.42 (t,  $J = 8.8$  Hz, 1H, H-2), 4.08 (dd,  $J = 8, 6.4$  Hz, 1H, H-2), 2.64-2.58 (m, 1H, H-6), 2.49- 2.40 (m, 1H, H-6), 2.06-1.98 (m, 2H, H-7a and H-11), 1.74-1.41 (m, 7H, H-7, H-8, H-9 and H-10), 1.22 (qd,  $J = 13.2, 4.8$  Hz, 1H, H-9), 0.68 (d,  $J = 7.0$  Hz, 3H,  $CH_3$ -C-10), 0.67 (d,  $J = 7.0$  Hz, 3H,  $CH_3$ -C-11);  $^{13}C$  NMR (100.6 MHz,  $CDCl_3$ )  $\delta$  176.2 (CO), 141.8 ( $Cq$ -Ar), 126.8 (CH-Ar), 125.1 (CH-Ar), 128.3 (CH-Ar), 98.7 (C-11a), 66.6 (C-2), 59.0 (C-3), 36.8 (C-7a), 35.5 (C-11), 35.4 (C-6), 30.3 (C-10), 28.1 (C-9 and C-8), 22.8 (C-7), 19.2 ( $CH_3$ -C-11), 9.0 ( $CH_3$ -C-10); HRMS calcd for  $[C_{19}H_{25}NO_2 + H^+]$ : 300.1958; found 300.1957.

**(3R,7aS,9R,11S,11aS)-9,11-Dimethyl-5-oxo-3-phenyldecahydrooxazolo[2,3-*j*]quinoline (8a) and its (3R,7aR,9S,11R,11aR), (3R,7aS,9R,11R,11aS) and (3R,7aR,9R,11R,11aS) isomers (8b, 8c and 8d, respectively):**

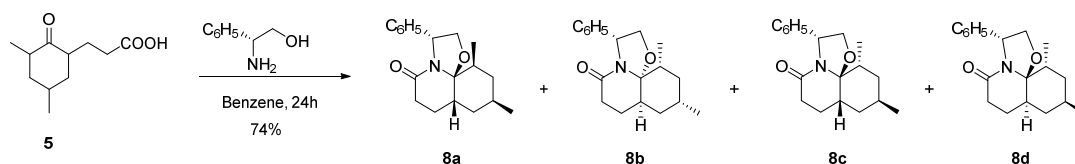

Operating as described in the preparation of lactams **7**, from a diastereomeric mixture of keto-acids **5** (1.07 g, 5.4 mmol) and (*R*)-phenylglycinol (1.13 g, 8.2 mmol) in benzene (55 mL), lactams **8a** (502 mg, 31%), **8b** (543 mg, 34%), **8c** (29 mg, 2 %), and **8d** (59 mg, 4%) were obtained after flash column chromatography (9:1 to 1:1 hexane-EtOAc) as colorless solids (**8c** as a colorless gum).

**8a**: mp: 82-84 °C (hexane- $CH_2Cl_2$ );  $[\alpha]^{23}_D - 153.3$  ( $c$  1.04,  $CHCl_3$ ); IR (NaCl): 1658 (CO)  $cm^{-1}$ ;  $^1H$  NMR (400 MHz,  $CDCl_3$ ,  $g$ -HSQC)  $\delta$  7.35-7.20 (m, 5H, ArH), 5.47 (dd,  $J = 7.2, 4.4$  Hz, 1H, H-3), 4.32 (dd,  $J = 8.8, 4.4$  Hz, 1H, H-2), 4.24 (dd,  $J = 8.8, 7.2$  Hz, 1H, H-2), 2.61-2.47 (m, 2H, H-6), 1.98-1.74 (m, 5H, H-7, H-7a, H-9 and H-11), 1.59-1.55 (m, 2H, H-8), 1.51-1.47 (m, 1H, H-10), 1.12 (q,  $J = 12.8$  Hz, 1H, H-10), 0.90 (d,  $J = 6.4$  Hz, 3H,  $CH_3$ -C-9), 0.53 (d,  $J = 6.8$  Hz, 3H,  $CH_3$ -C-11);  $^{13}C$  NMR

(100.6 MHz, CDCl<sub>3</sub>)  $\delta$  172.1 (CO), 139.2 (*C<sub>q</sub>*-Ar), 127.0 (CH-Ar), 128.1 (CH-Ar), 126.7 (CH-Ar), 98.3 (C-11a), 68.4 (C-2), 59.2 (C-3), 40.3 (C-10), 35.6 (C-8), 29.1 (C-6), 39.6 (C-7a), 35.5 (C-11), 25.8 (C-9), 21.8 (CH<sub>3</sub>C-9), 20.3 (C-7), 16.3 (CH<sub>3</sub>C-11); HRMS calcd for [C<sub>19</sub>H<sub>25</sub>NO<sub>2</sub> + H<sup>+</sup>]: 300.1958; found 300.1962. **8b**: mp: 66-68 °C (hexane-CH<sub>2</sub>Cl<sub>2</sub>); [ $\alpha$ ]<sup>23</sup><sub>D</sub> + 32.7 (*c* 0.99, CHCl<sub>3</sub>); IR (NaCl): 1662 (CO) cm<sup>-1</sup>; <sup>1</sup>H NMR (400 MHz, CDCl<sub>3</sub>, *g*-HSQC)  $\delta$  7.33-7.20 (m, 5H, ArH), 5.07 (dd, *J* = 7.6, 4.0 Hz, 1H, H-3), 4.55 (dd, *J* = 8.8, 7.6 Hz, 1H, H-2), 3.90 (dd, *J* = 8.8, 4.0 Hz, 1H, H-2), 2.46-2.28 (m, 2H, H-6), 2.22-2.15 (m, 1H, H-7a), 1.97-1.87 (m, 2H, H-7 and H-9), 1.87-1.77 (m, 2H, H-7 and H-11), 1.69 (m, 1H, H-8), 1.63 (m, 1H, H-8), 1.58-1.52 (m, 1H, H-10), 1.25 (q, *J* = 12.5 Hz, 1H, H-10), 1.01 (d, *J* = 6.8 Hz, 3H, CH<sub>3</sub>C-9), 0.93 (d, *J* = 6.4 Hz, 3H, CH<sub>3</sub>C-11); <sup>13</sup>C NMR (100.6 MHz, CDCl<sub>3</sub>)  $\delta$  168.1 (CO), 141.3 (*C<sub>q</sub>*-Ar), 127.3 (CH-Ar), 128.4 (CH-Ar), 126.4 (CH-Ar), 96.8 (C-11a), 74.8 (C-2), 61.7 (C-3), 40.6 (C-7a), 40.0 (C-10), 38.2 (C-9), 35.9 (C-8), 29.7 (C-6), 25.9 (C-11), 21.8 (CH<sub>3</sub>C-9 and C-7), 16.2 (CH<sub>3</sub>C-11); HRMS calcd for [C<sub>19</sub>H<sub>25</sub>NO<sub>2</sub> + H<sup>+</sup>]: 300.1958; found 300.1962. **8c**: IR (NaCl): 1656 (CO) cm<sup>-1</sup>; <sup>1</sup>H NMR (400 MHz, CDCl<sub>3</sub>, *g*-HSQC)  $\delta$  7.34-7.31 (m, 2H, ArH), 7.27-7.22 (m, 3H, ArH), 5.38 (t, *J* = 8.4 Hz, 1H, H-3), 4.43 (t, *J* = 8.8 Hz, 1H, H-2), 3.96 (dd, *J* = 8.8, 8 Hz, 1H, H-2), 2.70-2.63 (m, 1H, H-6), 2.57-2.48 (m, 1H, H-6), 2.21-2.09 (m, 1H, H-7), 2.08-2.01 (m, 1H, H-11), 1.91-1.83 (m, 2H, H-7a and H-9), 1.74-1.50 (m, 4H, H-7, H-8 and H-10), 1.46-1.40 (m, 1H, H-8), 1.16 (d, *J* = 7.6 Hz, 3H, CH<sub>3</sub>C-11), 0.93 (d, *J* = 6.4 Hz, 3H, CH<sub>3</sub>C-9); <sup>13</sup>C NMR (100.6 MHz, CDCl<sub>3</sub>)  $\delta$  171.3 (CO), 139.9 (*C<sub>q</sub>*-Ar), 127.2 (CH-Ar), 128.5 (CH-Ar), 126.1 (CH-Ar), 96.7 (C-11a), 69.0 (C-2), 60.0 (C-3), 40.3 (C-7a), 37.2 (C-8), 36.9 (C-10), 34.2 (C-11), 30.5 (C-6), 22.8 (C-7), 22.1 (CH<sub>3</sub>C-9), 20.6 (C-9), 16.5 (CH<sub>3</sub>C-11); HRMS calcd for [C<sub>19</sub>H<sub>25</sub>NO<sub>2</sub> + H<sup>+</sup>]: 300.1958; found 300.1952. **8d**: mp: 119-121 °C (hexane-CH<sub>2</sub>Cl<sub>2</sub>); [ $\alpha$ ]<sup>23</sup><sub>D</sub> - 193.3 (*c* 1.01, CHCl<sub>3</sub>); IR (NaCl): 1668 (CO) cm<sup>-1</sup>; <sup>1</sup>H NMR (400 MHz, CDCl<sub>3</sub>, *g*-HSQC)  $\delta$  7.34-7.31 (m, 2H, ArH), 7.26-7.22 (m, 3H, ArH), 5.64 (dd, *J* = 8.8, 6.0 Hz, 1H, H-3), 4.42 (dd, *J* = 8.8, 8.0 Hz, 1H, H-2), 4.12 (dd, *J* = 8.0, 6.0 Hz, 1H, H-2), 2.60 (dd, *J* = 16.8, 3.6 Hz, 1H, H-6), 2.45 (dd, *J* = 14.0, 5.2 Hz, 1H, H-6), 2.18 (tt, *J* = 12.4, 2.8 Hz, 1H, H-7a), 1.83-1.68 (m, 3H, H-7, H-9 and H-11), 1.62-1.57 (m, 1H, H-8), 1.52-1.41 (m, 3H, H-7, H-8 and H-10), 1.23-1.18 (m, 1H, H-10), 0.87 (d, *J* = 6.4 Hz, 3H, CH<sub>3</sub>C-9), 0.83 (d, *J* = 6.8 Hz, 3H, CH<sub>3</sub>C-11); <sup>13</sup>C NMR (100.6 MHz, CDCl<sub>3</sub>)  $\delta$  176.2 (CO), 141.7 (*C<sub>q</sub>*-Ar), 126.8 (CH-Ar), 128.3 (CH-Ar), 125.2 (CH-Ar), 98.0 (C-11a), 66.6 (C-2), 59.0 (C-3), 37.2 (C-8), 36.4 (C-10), 35.7 (C-7a), 35.4 (C-6), 31.8 (C-11), 26.4 (C-9), 22.9 (C-7), 21.8 (CH<sub>3</sub>C-9), 14.6 (CH<sub>3</sub>C-11); HRMS calcd for [C<sub>19</sub>H<sub>25</sub>NO<sub>2</sub> + H<sup>+</sup>]: 300.1958; found 300.1952.

**(3R,7aS,8S,11S,11aS)-8,11-Dimethyl-5-oxo-3-phenyldecahydrooxazolo[2,3-*j*]quinoline (9a) and its (3R,7aR,8R,11R,11aR) (3R,7aS,8S,11R,11aS), and (3R,7aR,8S,11R,11aS) isomers (9b, 9c and**

**9d, respectively):**

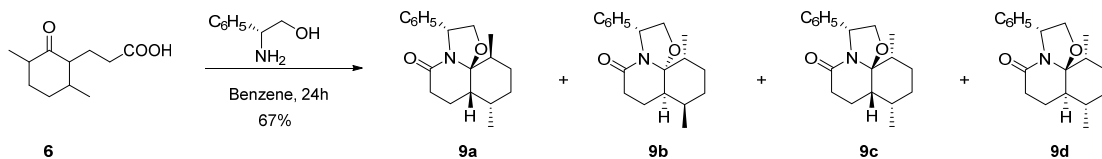

Operating as described in the preparation of lactams **7**, from a diastereomeric mixture of keto-acids **6** (4.48 g, 22.58 mmol) and (*R*)-phenylglycinol (4.65 g, 33.86 mmol) in benzene (220 mL), lactams **9a** (2.00 g, 30%), **9b** (1.96 g, 29 %), **9c** (0.34 g, 5 %), and **9d** (0.18 g, 3 %) were obtained after flash column chromatography (9:1 to 1:1 hexane–EtOAc) as colorless solids. **9a**: mp: 123–126 °C (hexane–CH<sub>2</sub>Cl<sub>2</sub>); [ $\alpha$ ]<sup>23</sup><sub>D</sub> – 173.2 (*c* 1.02, CHCl<sub>3</sub>); IR (NaCl): 1655 (CO) cm<sup>-1</sup>; <sup>1</sup>H NMR (400 MHz, CDCl<sub>3</sub>, COSY, *g*-HSQC)  $\delta$  7.35–7.38 (m, 2H, ArH), 7.33–7.29 (m, 2H, ArH), 7.25–7.21 (m, 1H, ArH), 5.47 (dd, *J* = 7.2, 4.4 Hz, 1H, H-3), 4.34 (dd, *J* = 9.2, 4.4 Hz, 1H, H-2), 4.23 (dd, *J* = 9.2, 7.2 Hz, 1H, H-2), 2.54–2.51 (m, 2H, H-6), 2.17–2.10 (m, 1H, H-8), 1.79–1.69 (m, 4H, H-7, H-7a and H-11), 1.55–1.49 (m, 1H, H-9), 1.46–1.18 (m, 3H, H-9 and H-10), 0.91 (d, *J* = 6.8 Hz, 3H, CH<sub>3</sub>C-8), 0.55 (d, *J* = 6.8 Hz, 3H, CH<sub>3</sub>C-11); <sup>13</sup>C NMR (100.6 MHz, CDCl<sub>3</sub>)  $\delta$  172.2 (CO), 139.2 (*C*<sub>q</sub>-Ar), 126.9 (CH-Ar), 128.2 (CH-Ar), 127.1 (CH-Ar), 99.1 (C-11a), 68.3 (C-2), 59.2 (C-3), 44.5 (C-7a), 34.9 (C-11), 31.2 (C-9 and C-8), 28.6 (C-6), 27.6 (C-10), 18.6 (CH<sub>3</sub>C-8), 16.1 (CH<sub>3</sub>C-11), 14.9 (C-7); HRMS calcd for [C<sub>19</sub>H<sub>25</sub>NO<sub>2</sub> + H<sup>+</sup>]: 300.1958; found 300.1959. **9b**: mp: 174–177 °C (hexane–CH<sub>2</sub>Cl<sub>2</sub>); [ $\alpha$ ]<sup>23</sup><sub>D</sub> + 52.6 (*c* 1.01, CHCl<sub>3</sub>); IR (NaCl): 1662 (CO) cm<sup>-1</sup>; <sup>1</sup>H NMR (400 MHz, CDCl<sub>3</sub>, COSY, *g*-HSQC)  $\delta$  7.33–7.21 (m, 5H, ArH), 5.08 (dd, *J* = 8.0, 4.0 Hz, 1H, H-3), 4.55 (dd, *J* = 8.8, 8.0 Hz, 1H, H-2), 3.90 (dd, *J* = 8.8, 4.0 Hz, 1H, H-2), 2.42–2.33 (m, 2H, H-6), 2.28–2.17 (m, 1H, H-11), 2.07–2.01 (m, 1H, H-7a), 1.85–1.68 (m, 3H, H-7 and H-8), 1.60–1.45 (m, 2H, H-9 and H-10), 1.35–1.24 (m, 1H, H-10), 1.01 (d, *J* = 6.8 Hz, 3H, CH<sub>3</sub>C-8), 0.96 (d, *J* = 6.8 Hz, 3H, CH<sub>3</sub>C-11); <sup>13</sup>C NMR (100.6 MHz, CDCl<sub>3</sub>)  $\delta$  168.1 (CO), 141.3 (*C*<sub>q</sub>-Ar), 127.4 (CH-Ar), 128.5 (CH-Ar), 126.6 (CH-Ar), 97.6 (C-11a), 75.0 (C-2), 61.8 (C-3), 45.7 (C-7a), 37.8 (C-8), 31.4 (C-11), 31.0 (C-9), 29.1 (C-6), 27.7 (C-10), 18.4 (CH<sub>3</sub>C-11), 16.1 (CH<sub>3</sub>C-8), 16.0 (C-7); HRMS calcd for [C<sub>19</sub>H<sub>25</sub>NO<sub>2</sub> + H<sup>+</sup>]: 300.1958; found 300.1960. **9c**: mp: 98–102 °C (hexane–CH<sub>2</sub>Cl<sub>2</sub>); [ $\alpha$ ]<sup>23</sup><sub>D</sub> – 133.8 (*c* 1.01, CHCl<sub>3</sub>); IR (NaCl): 1655 (CO) cm<sup>-1</sup>; <sup>1</sup>H NMR (400 MHz, CDCl<sub>3</sub>, COSY, *g*-HSQC)  $\delta$  7.35–7.30 (m, 2H, ArH), 7.28–7.22 (m, 3H, ArH), 5.37 (t, *J* = 8.0 Hz, 1H, H-3), 4.41 (m, 1H, H-2), 3.95 (dd, *J* = 9.2, 8.0 Hz, 1H, H-2), 2.70–2.63 (m, 1H, H-6), 2.53–2.44 (m, 1H, H-6), 2.20–2.10 (m, 1H, H-8), 2.05–1.96 (m, 1H, H-11), 1.91–1.69 (m, 4H, H-7, H-7a and H-9), 1.48–1.26 (m, 3H, H-9 and H-10), 1.13 (d, *J* = 7.2 Hz, 3H, CH<sub>3</sub>C-11), 0.96 (d, *J* = 6.8 Hz, 3H, CH<sub>3</sub>C-8); <sup>13</sup>C NMR (100.6 MHz, CDCl<sub>3</sub>)  $\delta$  171.1 (CO), 140.0 (*C*<sub>q</sub>-Ar), 127.2 (CH-Ar), 128.5 (CH-Ar), 126.1 (CH-Ar), 97.7 (C-11a), 69.1 (C-2), 60.1 (C-3), 45.1 (C-7a), 33.4 (C-11), 31.7 (C-8), 30.0 (C-6), 28.3 (C-9), 23.1 (C-10), 18.9 (CH<sub>3</sub>C-8), 16.1 (C-7), 15.9 (CH<sub>3</sub>C-11); HRMS calcd for [C<sub>19</sub>H<sub>25</sub>NO<sub>2</sub> + H<sup>+</sup>]: 300.1958; found 300.1958. **9d**: mp: 99–103 °C (hexane–CH<sub>2</sub>Cl<sub>2</sub>); [ $\alpha$ ]<sup>23</sup><sub>D</sub> – 194.4



(*c* 1.05, CHCl<sub>3</sub>); IR (NaCl): 1668 (CO) cm<sup>-1</sup>; <sup>1</sup>H NMR (400 MHz, CDCl<sub>3</sub>, COSY, *g*-HSQC) δ 7.34-7.31 (m, 2H, ArH), 7.26-7.21 (m, 3H, ArH), 5.62 (dd, *J* = 8.4, 6.4 Hz, 1H, H-3), 4.42 (t, *J* = 8.4 Hz, 1H, H-2), 4.10 (dd, *J* = 8.4, 6.4 Hz, 1H, H-2), 2.63 (dt, *J* = 16.8, 2.8 Hz, 1H, H-6), 2.38 (ddd, *J* = 16.8, 13.6, 4.4 Hz, 1H, H-6), 1.89-1.70 (m, 5H, H-7, H-7a, H-8, H-9 and H-11), 1.54-1.47 (m, 2H, H-7 and H-10), 1.27-1.16 (m, 2H, H-9 and H-10), 0.94 (d, *J* = 6.8 Hz, CH<sub>3</sub>C-8), 0.83 (d, *J* = 6.8 Hz, CH<sub>3</sub>C-11); <sup>13</sup>C NMR (100.6 MHz, CDCl<sub>3</sub>) δ 175.8 (CO), 141.8 (*C*<sub>q</sub>-Ar), 126.8 (CH-Ar), 128.3 (CH-Ar), 125.1 (CH-Ar), 98.4 (C-11a), 66.7 (C-2), 58.8 (C-3), 42.4 (C-7a), 35.3 (C-6), 32.6 (C-8), 31.3 (C-11), 29.6 (C-10), 27.0 (C-9), 19.8 (CH<sub>3</sub>C-8), 19.2 (C-7), 14.0 (CH<sub>3</sub>C-11); HRMS calcd for [C<sub>19</sub>H<sub>25</sub>NO<sub>2</sub> + H<sup>+</sup>]: 300.1958; found 300.1955.

**(4a*R*,7*R*,8*S*,8a*S*)-1-[(1*R*)-2-Hydroxy-1-phenylethyl]-7,8-dimethyldecahydroquinoline (10):**

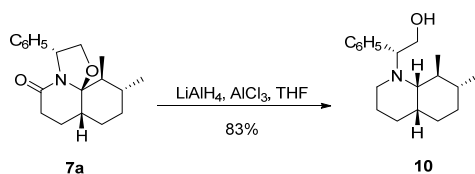

LiAlH<sub>4</sub> (13.5 mL of a 1M solution in THF, 13.5 mmol) was slowly added to a stirring suspension of AlCl<sub>3</sub> (555 mg, 4.2 mmol) in anhydrous THF (25 mL) at 0 °C. After 1 h, the mixture was cooled at –78 °C, and a solution of the lactam **7a** (623 mg, 2.1 mmol) in anhydrous THF (10 mL) was added dropwise. The stirring was continued at –78 °C for 90 min and at rt for 2 h. Cold water was slowly added until no bubbling is seen and the resulting mixture was filtered over Celite<sup>®</sup>. The filtrate was dried and concentrated. Flash chromatography (9:1 to 7:3 hexane–EtOAc) afforded decahydroquinoline **10** (498 mg, 83%) as a colorless solid: mp: 94–97 °C (hexane–CH<sub>2</sub>Cl<sub>2</sub>); [ $\alpha$ ]<sub>D</sub><sup>23</sup> –65.8 (*c* 1.0, CHCl<sub>3</sub>); IR (NaCl): 3420 (OH) cm<sup>-1</sup>; <sup>1</sup>H NMR (400 MHz, CDCl<sub>3</sub>, COSY, *g*-HSQC) δ 7.38-7.40 (m, 2H, ArH), 7.27-7.34 (m, 3H, ArH), 4.05 (m, 1H, CHCH<sub>2</sub>O), 3.84 (dd, *J* = 10.8, 5.2 Hz, 1H, CHCH<sub>2</sub>O), 3.74 (dd, *J* = 10.8, 4.4 Hz, 1H, CHCH<sub>2</sub>O), 2.45-2.66 (m, 4H, H-2, H-8a and OH), 2.00-2.05 (m, 1H, H-8), 1.69-1.76 (m, 2H, H-4 and H-4a), 1.54 (dt, *J* = 13.2, 4.4 Hz, 1H, H-6), 1.44-1.48 (m, 1H, H-6), 1.34-1.41 (m, 2H, H-3 and H-5), 1.25-1.30 (m, 1H, H-4), 1.19 (dd, *J* = 13.2, 4.0 Hz, 1H, H-5), 1.08-1.12 (m, 1H, H-3), 1.13-1.15 (m, 1H, H-7), 1.09 (d, *J* = 6.4 Hz, 3H, CH<sub>3</sub>C-8), 0.96 (d, *J* = 6.0 Hz, 3H, CH<sub>3</sub>C-7); <sup>13</sup>C NMR (100.6 MHz, CDCl<sub>3</sub>) δ 142.0 (*C*<sub>q</sub>-Ar), 127.5 (CH-Ar), 128.6 (CH-Ar), 128.4 (CH-Ar), 65.4 (CHCH<sub>2</sub>O), 63.6 (CHCH<sub>2</sub>O), 63.1 (C-8a), 40.6 (C-2), 39.2 (C-7), 35.9 (C-4a), 31.1 (C-6), 30.0 (C-5), 29.8 (C-8), 25.0 (C-4), 21.1 (C-3), 20.8 (CH<sub>3</sub>C-8), 15.7 (CH<sub>3</sub>C-7); HRMS calcd for [C<sub>19</sub>H<sub>29</sub>NO + H<sup>+</sup>]: 288.2332; found 288.2332.

**(4a*R*,7*R*,8*S*,8a*S*)-1-(*tert*-Butoxycarbonyl)-7,8-dimethyldecahydroquinoline (11)**

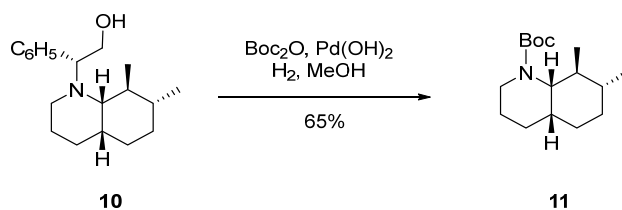

A solution of *cis*-decahydroquinoline **10** (160 mg, 0.6 mmol) and  $\text{Boc}_2\text{O}$  (330 mg, 1.5 mmol) in  $\text{CH}_3\text{OH}$  (13 mL) containing 40%  $\text{Pd(OH)}_2$  (64 mg) was stirred under hydrogen at rt for 8h. The catalyst was removed by filtration over Celite<sup>®</sup>, and the filtrate was concentrated. Flash chromatography (99:1 to 95:5 hexane– $\text{Et}_2\text{O}$ ) afforded decahydroquinoline **11** (96.4 mg, 65%) as a yellowish oil:  $[\alpha]_D^{23} - 52.0$  (*c* 1.1,  $\text{CHCl}_3$ ); IR (NaCl): 1690 (CO)  $\text{cm}^{-1}$ ;  $^1\text{H}$  NMR (400 MHz,  $\text{CDCl}_3$ , COSY, *g*-HSQC)  $\delta$  4.06 and 3.92 [(dd,  $J = 11.6, 4.8$  Hz) and (dd,  $J = 13.6, 3.6$  Hz), 1H, H-2], 3.73 and 3.91-3.86 [(dd,  $J = 11.2, 4.4$  Hz) and (m), 1H, H-8a], 2.68 and 2.60 [(td,  $J = 13.6, 2.8$  Hz) and (td,  $J = 13.2, 2.4$  Hz), 1H, H-2], 1.88-1.77 (m, 1H, H-4a), 1.74-1.70 (m, 1H), 1.67-1.60 (m, 2H), 1.56-1.50 (m, 2H), 1.45 [s, 9H,  $(\text{CH}_3)_3$ ], 1.48-1.43 (m, 1H), 1.40-1.34 (m, 2H), 1.19-1.13 (m, 2H), 0.95-0.93 (m, 3H,  $\text{CH}_3\text{C-7}$ ), 0.81 (d,  $J = 6.4$  Hz, 3H,  $\text{CH}_3\text{C-8}$ );  $^{13}\text{C}$  NMR (100.6 MHz,  $\text{CDCl}_3$ )  $\delta$  155.3 and 155.2 (CO), 78.9 and 78.7 (Cq), 59.1 and 57.6 (C-8a), 38.6 and 38.5 (CH), 38.9 and 37.6 (C-2) 35.6 and 35.3 (CH), 35.3 and 35.1 (C-4a), 30.9 and 30.7 ( $\text{CH}_2$ ), 30.1 and 30.0 ( $\text{CH}_2$ ), 28.4 [ $(\text{CH}_3)_3$ ], 26.2 and 25.8 (C-3), 24.6 ( $\text{CH}_2$ ), 20.3 ( $\text{CH}_3\text{C-7}$ ), 14.9 and 14.4 ( $\text{CH}_3\text{C-8}$ ); HRMS calcd for  $[\text{C}_{16}\text{H}_{29}\text{NO}_2 + \text{Na}^+]$ : 290.2091; found 290.2094.

**(4a*S*,6*R*,8*S*,8a*R*)-1-[(1*R*)-2-Hydroxy-1-phenylethyl]-6,8-dimethyldecahydroquinoline (**12**):**

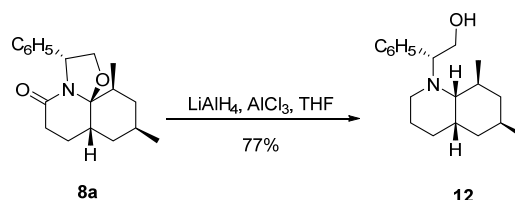

Operating as described in the preparation of decahydroquinoline **10**, from  $\text{LiAlH}_4$  (5.8 mL of a 1M solution in THF, 5.8 mmol),  $\text{AlCl}_3$  (240 mg, 1.8 mmol) in anhydrous THF (12 mL), and a solution of lactam **8a** (269 mg, 0.9 mmol) in anhydrous THF (8 mL), decahydroquinoline **12** (200 mg, 77%) was obtained after flash column chromatography (9:1 hexane– $\text{EtOAc}$ ) as a colorless solid: mp: 38-40 °C (hexane– $\text{CH}_2\text{Cl}_2$ );  $[\alpha]_D^{23} - 24.7$  (*c* 1.0,  $\text{CHCl}_3$ ); IR (NaCl): 3425 (OH)  $\text{cm}^{-1}$ ;  $^1\text{H}$  NMR (400 MHz,  $\text{CDCl}_3$ , COSY, *g*-HSQC)  $\delta$  7.25-7.40 (m, 5H, ArH), 4.03 (t,  $J = 5.2$  Hz, 1H,  $\text{CHCH}_2\text{O}$ ), 3.82 (dd,  $J = 10.8, 5.2$  Hz, 1H,  $\text{CHCH}_2\text{O}$ ), 3.73 (dd,  $J = 10.8, 4.8$  Hz, 1H,  $\text{CHCH}_2\text{O}$ ), 2.61-2.69 (m, 1H, H-2), 2.51-2.55 (m, 1H, H-2), 2.47 (dd,  $J = 10.8, 4.8$  Hz, 1H, H-8a), 2.09-2.19 (m, 1H, H-6), 1.96-2.03 (m, 1H, H-4a), 1.63-1.74 (m, 2H, H-5, H-7), 1.59-1.66 (m, 1H, H-8), 1.45-1.50 (m, 1H, H-4), 1.28-1.37 (m,

2H, H-3, H-5), 1.16 (dd,  $J = 12.8, 4.8$  Hz, 1H, H-4), 1.06-1.12 (m, 1H, H-3), 1.03 (d,  $J = 6.4$  Hz, 3H, CH<sub>3</sub>C-6), 0.83 (d,  $J = 6.4$  Hz, 3H, CH<sub>3</sub>C-8), 0.73 (q,  $J = 12.0$  Hz, 1H, H-7); <sup>13</sup>C NMR (100.6 MHz, CDCl<sub>3</sub>)  $\delta$  141.9 (C<sub>q</sub>-Ar), 128.6 (CH-Ar), 128.4 (CH-Ar), 127.0 (CH-Ar), 65.8 (CHCH<sub>2</sub>O), 64.3 (C-8a), 63.3 (CHCH<sub>2</sub>O), 44.6 (C-7), 41.1 (C-4), 40.6 (C-2), 30.6 (C-4a), 28.8 (C-6), 26.7 (C-8), 25.8 (C-5), 22.5 (CH<sub>3</sub>C-8), 21.6 (C-3), 19.7 (CH<sub>3</sub>C-6); HRMS calcd for [C<sub>19</sub>H<sub>29</sub>NO + H<sup>+</sup>]: 288.2322; found 288.2322.

**(4a*S*,6*R*,8*S*,8a*R*)-1-(*tert*-Butoxycarbonyl)-6,8-dimethyldecahydroquinoline (13)**

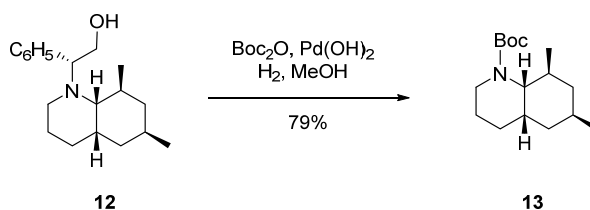

Operating as in the preparation of decahydroquinoline **11**, from decahydroquinoline **12** (116 mg, 0.4 mmol), Boc<sub>2</sub>O (106 mg, 0.5 mmol) and 40% Pd(OH)<sub>2</sub> (46 mg) in CH<sub>3</sub>OH (9 mL), decahydroquinoline **13** (88 mg, 79%) was obtained after flash column chromatography (99:1 to 95:5 hexane–Et<sub>2</sub>O) as a yellowish oil: [ $\alpha$ ]<sub>D</sub><sup>23</sup> – 15.5 (*c* 1.0, CHCl<sub>3</sub>); IR (NaCl): 1691 (CO) cm<sup>-1</sup>; <sup>1</sup>H NMR (400 MHz, CDCl<sub>3</sub>, COSY, *g*-HSQC)  $\delta$  4.06 and 3.88 [(m) and (dd,  $J = 13.6, 4.0$  Hz), 1H, H-2<sub>b</sub>], 3.83 and 3.63 [(dd,  $J = 11.6, 4.8$  Hz) and (dd,  $J = 16.4, 4.8$  Hz), 1H, H-8a], 2.68 and 2.64 [(td,  $J = 13.2, 2.8$  Hz) and (td,  $J = 13.2, 2.4$  Hz), 1H, H-2<sub>a</sub>], 1.99-1.90 (m, 1H, H-8), 1.84-1.77 (m, 1H, H-4a), 1.70-1.58 (m, 4H, H-3, H-6 and H-7<sub>b</sub>), 1.53-1.49 (m, 1H, H-5<sub>b</sub>), 1.45 [s, 9H, (CH<sub>3</sub>)<sub>3</sub>], 1.40-1.35 (m, 2H, H-4), 1.28-1.21 (m, 1H, H-5<sub>a</sub>), 0.85 and 0.83 (d,  $J = 4.2$  Hz, 3H, CH<sub>3</sub>C-8), 0.79 (d,  $J = 6.4$  Hz, 3H, CH<sub>3</sub>C-6), 0.72 (q,  $J = 11.6$  Hz, 1H, H-7<sub>a</sub>); <sup>13</sup>C NMR (100.6 MHz, CDCl<sub>3</sub>)  $\delta$  155.4 and 155.2 (CO), 78.9 and 78.8 (C<sub>q</sub>), 59.4 and 57.9 (C-8a), 43.6 and 43.5 (C-7), 40.6 and 40.5 (C-5), 39.0 and 37.8 (C-2), 36.1 and 35.8 (C-4a), 28.5 [(CH<sub>3</sub>)<sub>3</sub>], 28.4 and 28.2 (C-8), 26.9 and 26.8 (C-6), 26.3 and 25.9 (C-3) 25.5 (C-4), 22.4 (CH<sub>3</sub>C-8), 18.6 and 18.0 (CH<sub>3</sub>C-6); HRMS calcd for [C<sub>16</sub>H<sub>29</sub>NO<sub>2</sub> + H<sup>+</sup>]: 268.2271; found 268.2268.

**(4a*S*,5*S*,8*S*,8a*R*)-1-[(1*R*)-2-Hydroxy-1-phenylethyl]-5,8-dimethyldecahydroquinoline (14):**

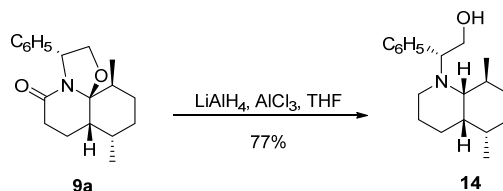

Operating as described in the preparation of decahydroquinoline **10**, from LiAlH<sub>4</sub> (13 mL of a 1M solution in THF, 13.0 mmol), AlCl<sub>3</sub> (530 mg, 3.97 mmol) in anhydrous THF (25 mL), and a solution

of lactam **9a** (595 mg, 1.99 mmol) in anhydrous THF (15 mL), decahydroquinoline **14** (441 mg, 77%) was obtained after flash column chromatography (95:5 hexane–EtOAc) as a yellowish oil:  $[\alpha]_D^{23} - 33.2$  (*c* 1.03, CHCl<sub>3</sub>); IR (NaCl): 3425 (OH) cm<sup>-1</sup>; <sup>1</sup>H NMR (400 MHz, CDCl<sub>3</sub>, COSY, *g*-HSQC)  $\delta$  7.42-7.28 (m, 5H, ArH), 4.11 (t, *J* = 5.2 Hz, 1H, CHCH<sub>2</sub>O), 3.85 (dd, *J* = 11.0, 5.2 Hz, 1H, CHCH<sub>2</sub>O), 3.78 (dd, *J* = 11.0, 4.8 Hz, 1H, CHCH<sub>2</sub>O), 2.77-2.69 (m, 1H, H-2), 2.58-2.54 (m, 2H, H-2 and H-8a), 2.12-2.04 (m, 1H, H-8), 1.96-1.89 (m, 1H, H-4a), 1.75 (dq, *J* = 9.6, 2.8 Hz, 1H, H-7), 1.63-1.54 (m, 1H, H-5), 1.48-1.42 (m, 2H, H-4), 1.36-1.29 (m, 2H, H-3 and H-6), 1.21-1.09 (m, 3H, H-3, H-6 and H-7), 1.08 (d, *J* = 6.4 Hz, 3H, CH<sub>3</sub>C-8), 0.86 (d, *J* = 6.8 Hz, 3H, CH<sub>3</sub>C-5); <sup>13</sup>C NMR (100.6 MHz, CDCl<sub>3</sub>)  $\delta$  141.2 (*Cq*-Ar), 128.4 (CH-Ar), 127.6 (CH-Ar), 128.7 (CH-Ar), 65.5 (CHCH<sub>2</sub>O), 65.4 (C-8a), 63.3 (CHCH<sub>2</sub>O), 41.3 (C-2), 35.7 (C-5), 35.6 (C-4a), 35.3 (C-7), 28.8 (C-6), 28.5 (C-8), 20.8 (C-3), 19.3 (CH<sub>3</sub>C-8), 18.9 (C-4 and CH<sub>3</sub>C-5); HRMS calcd for [C<sub>19</sub>H<sub>29</sub>NO + H<sup>+</sup>]: 288.2332; found 288.2332.

**(4a*S*,5*S*,8*S*,8a*R*)-1-(*tert*-Butoxycarbonyl)-5,8-dimethyldecahydroquinoline (15)**

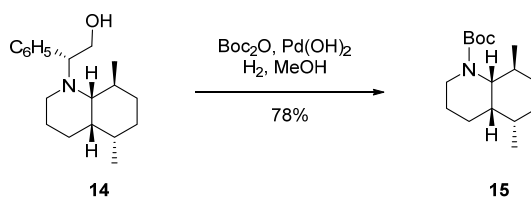

Operating as described in the preparation of decahydroquinoline **11**, from decahydroquinoline **14** (439 mg, 1.53 mmol), Boc<sub>2</sub>O (900 mg, 4.12 mmol), and 40% Pd(OH)<sub>2</sub> (176 mg) in CH<sub>3</sub>OH (35 mL), decahydroquinoline **15** (319 mg, 78%) was obtained after flash column chromatography (99:1 to 95:5 hexane–Et<sub>2</sub>O) as a colorless liquid:  $[\alpha]_D^{23} - 23.8$  (*c* 1.05, CHCl<sub>3</sub>); IR (NaCl): 1691 (CO) cm<sup>-1</sup>; <sup>1</sup>H NMR (400 MHz, CDCl<sub>3</sub>, COSY, *g*-HSQC)  $\delta$  4.09-4.05 and 3.92-3.87 [(m) and (m), 1H, H-2], 3.84 and 3.64 [(dd, *J* = 11.2, 4.0 Hz) and (dd, *J* = 11.6, 4.4 Hz), 1H, H-8a], 2.73 and 2.68 [(td, *J* = 12.8, 2.8 Hz) and (td, *J* = 12.8, 2.8 Hz), 1H, H-2], 1.94-1.84 (m, 1H, H-8), 1.75-1.61 (m, 4H, H-3, H-4a, H-5 and H-7), 1.53-1.48 (m, 1H, H-4), 1.46 [s, 9H, (CH<sub>3</sub>)<sub>3</sub>], 1.42-1.33 (m, 3H, H-3, H-4 and H-6), 1.18-1.03 (m, 2H, H-6 and H-7), 0.88 and 0.86 [(d, *J* = 6.8 Hz) and (d, *J* = 6.8 Hz), 3H, CH<sub>3</sub>C-5], 0.80 (d, *J* = 6.4 Hz, CH<sub>3</sub>C-8); <sup>13</sup>C NMR (100.6 MHz, CDCl<sub>3</sub>)  $\delta$  155.3 and 155.2 (CO), 78.9 and 78.8 (*Cq*), 60.4 and 59.0 (C-8a), 41.4 and 41.0 (C-5), 39.4 and 38.1 (C-2), 35.6 and 35.3 (C-4a), 34.4 and 34.2 (C-7), 29.0 and 28.9 (C-6), 28.5 [(CH<sub>3</sub>)<sub>3</sub>], 28.0 and 27.8 (C-8), 26.0 and 25.6 (C-3), 18.9 and 18.8 (CH<sub>3</sub>C-5), 18.7 and 18.6 (C-4), 18.3 and 17.8 (CH<sub>3</sub>C-8); HRMS calcd for [C<sub>16</sub>H<sub>29</sub>NO<sub>2</sub> + Na<sup>+</sup>]: 290.2091; found 290.2090.

**(4a*S*,7*S*,8*R*,8a*R*)-1-[(1*R*)-2-Hydroxy-1-phenylethyl]-7,8-dimethyldecahydroquinoline (16):**

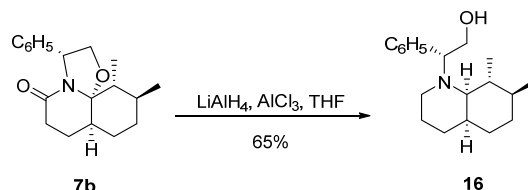

Operating as described in the preparation of decahydroquinoline **10**, from LiAlH<sub>4</sub> (14.4 mL of a 1M solution in THF, 14.4 mmol), AlCl<sub>3</sub> (590 mg, 4.43 mmol) in anhydrous THF (25 mL), and a solution of lactam **7b** (663 mg, 2.21 mmol) in anhydrous THF (10 mL), decahydroquinoline **16** (412 mg, 65%) was obtained after flash column chromatography (9:1 to 7:3 hexane–EtOAc) as a yellowish oil:  $[\alpha]_D^{23} - 42.4$  (*c* 1.0, CHCl<sub>3</sub>); IR (NaCl): 3313 (OH) cm<sup>-1</sup>; <sup>1</sup>H NMR (400 MHz, CDCl<sub>3</sub>, COSY, *g*-HSQC)  $\delta$  7.39-7.36 (m, 2H, ArH), 7.33-7.24 (m, 3H, ArH), 4.07 (dd, *J* = 5.6, 3.6 Hz, 1H, CHCH<sub>2</sub>O), 3.87 (dd, *J* = 10.6, 5.6 Hz, 1H, CHCH<sub>2</sub>O), 3.73 (dd, *J* = 10.6, 3.6 Hz, 1H, CHCH<sub>2</sub>O), 2.94-2.83 (m, 2H, H-2), 2.66 (br s, 1H, OH), 2.05 (dd, *J* = 11.2, 3.6 Hz, 1H, H-8a), 1.83-1.67 (m, 3H, H-3, H-4a and H-5), 1.61-1.57 (m, 1H, H-8), 1.38-1.07 (m, 6H, H-3, H-4, H-5 and H-6), 0.91 (d, *J* = 6.4 Hz, 3H, CH<sub>3</sub>C-7), 0.86 (d, *J* = 6 Hz, 3H, CH<sub>3</sub>C-8), 0.84- 0.78 (m, 1H, H-7); <sup>13</sup>C NMR (100.6 MHz, CDCl<sub>3</sub>)  $\delta$  141.7 (C<sub>q</sub>-Ar), 127.4 (CH-Ar), 128.3 (CH-Ar), 28.7 (CH-Ar), 64.5 (CHCH<sub>2</sub>O), 63.8 (CHCH<sub>2</sub>O), 61.1 (C-8a), 42.1 (C-2), 38.9 (C-7), 35.5 (C-8), 30.9 (C-6), 29.9 (C-5), 29.2 (C-4a), 25.2 (C-4), 21.0 (C-3), 20.7 (CH<sub>3</sub>C-8), 15.5 (CH<sub>3</sub>C-7); HRMS calcd for [C<sub>19</sub>H<sub>29</sub>NO + H<sup>+</sup>]: 288.2322; found 288.2319.

**(4a*S*,7*S*,8*R*,8a*R*)-1-(*tert*-Butoxycarbonyl)-7,8-dimethyldecahydroquinoline (*ent*-11)**

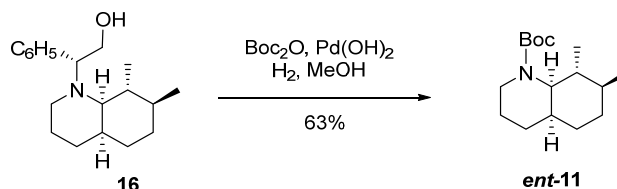

Operating as in the preparation of decahydroquinoline **11**, from decahydroquinoline **16** (156 mg, 0.54 mmol), Boc<sub>2</sub>O (319 mg, 1.46 mmol) and 40% Pd(OH)<sub>2</sub> (63 mg) in CH<sub>3</sub>OH (13 mL), decahydroquinoline *ent*-**11** (91.2 mg, 63%) was obtained after flash column chromatography (99:1 to 95:5 hexane–Et<sub>2</sub>O) as a yellowish oil:  $[\alpha]_D^{23} + 52.5$  (*c* 1.2, CHCl<sub>3</sub>).

**(4a*R*,6*S*,8*R*,8a*S*)-1-[(1*R*)-2-Hydroxy-1-phenylethyl]-6,8-dimethyldecahydroquinoline (17):**

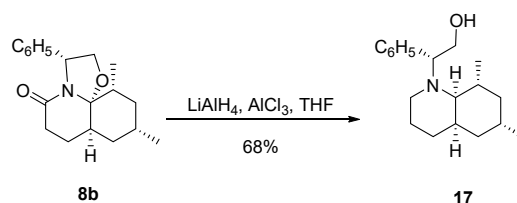

Operating as described in the preparation of decahydroquinoline **10**, from LiAlH<sub>4</sub> (7.3 mL of a 1M solution in THF, 7.3 mmol), AlCl<sub>3</sub> (300 mg, 2.26 mmol) in anhydrous THF (15 mL), and a solution of lactam **8b** (338.2 mg, 1.13 mmol) in anhydrous THF (10 mL), decahydroquinoline **17** (222 mg, 68%) was obtained after flash column chromatography (9:1 to 7:3 hexane–EtOAc) as a yellowish oil:  $[\alpha]_D^{23} - 65.2$  (*c* 1.1, CHCl<sub>3</sub>); IR (NaCl): 3395 (OH) cm<sup>-1</sup>; <sup>1</sup>H NMR (400 MHz, CDCl<sub>3</sub>, COSY, *g*-HSQC)  $\delta$  7.27-7.40 (m, 5H, ArH), 4.05 (dd, *J* = 5.2 Hz, 4.0 Hz, 1H, CHCH<sub>2</sub>O), 3.85 (dd, *J* = 10.8, 5.2 Hz, 1H, CHCH<sub>2</sub>O), 3.72 (dd, *J* = 10.8, 4.0 Hz, 1H, CHCH<sub>2</sub>O), 2.91-2.93 (m, 2H, H-2), 1.99-2.07 (m, 2H, H-6, H-8a), 1.69-1.76 (m, 3H, H-3, H-4a, H-5), 1.51-1.59 (m, 2H, H-7, H-8), 1.25-1.36 (m, 3H, H-3, H-5, H-4), 0.87 (d, *J* = 6.4 Hz, 3H, CH<sub>3</sub>C-6), 0.76-0.84 (m, 1H, H-4), 0.71 (d, *J* = 6.4 Hz, 3H, CH<sub>3</sub>C-8), 0.45 (q, *J* = 12.0 Hz, 1H, H-7); <sup>13</sup>C NMR (100.6 MHz, CDCl<sub>3</sub>)  $\delta$  141.7 (*C*<sub>q</sub>-Ar); 127.5 (CH-Ar), 128.3 (CH-Ar), 128.7 (CH-Ar), 64.9 (CHCH<sub>2</sub>O), 63.6 (CHCH<sub>2</sub>O), 61.6 (C-8a), 44.4 (C-7), 42.8 (C-2), 40.8 (C-4), 30.2 (C-4a), 28.4 (C-6), 26.6 (C-8), 26.1 (C-5), 22.4 (CH<sub>3</sub>C-8), 21.4 (C-3), 19.6 (CH<sub>3</sub>C-6); HRMS calcd for [C<sub>19</sub>H<sub>29</sub>NO + H<sup>+</sup>]: 288.2322; found 288.2322.

**(4aR,6S,8R,8aS)-1-(tert-Butoxycarbonyl)-6,8-dimethyldecahydroquinoline (ent-13)**

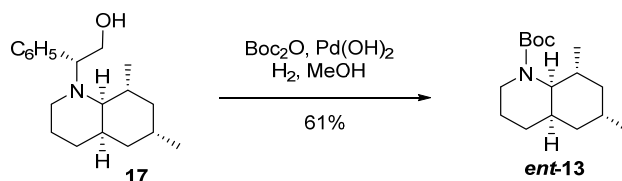

Operating as described in the preparation of decahydroquinoline **11**, from decahydroquinoline **17** (106 mg, 0.37 mmol), Boc<sub>2</sub>O (97 mg, 0.44 mmol), and 40% Pd(OH)<sub>2</sub> (43 mg) in CH<sub>3</sub>OH (8.5 mL), decahydroquinoline **ent-13** (64 mg, 61%) was obtained after flash column chromatography (99:1 to 95:5 hexane–Et<sub>2</sub>O) as a yellowish oil:  $[\alpha]_D^{23} + 15.2$  (*c* 1.0, CHCl<sub>3</sub>).

**(4aR,5R,8R,8aS)-1-[(1R)-2-Hydroxy-1-phenylethyl]-5,8-dimethyldecahydroquinoline (18):**

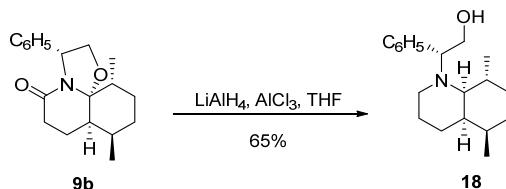

Operating as described in the preparation of decahydroquinoline **10**, from LiAlH<sub>4</sub> (11.6 mL of a 1M solution in THF, 11.6 mmol), AlCl<sub>3</sub> (477 mg, 3.57 mmol) in anhydrous THF (25 mL), and a solution of lactam **9b** (535 mg, 1.79 mmol) in anhydrous THF (10 mL), decahydroquinoline **18** (412 mg, 65%) was obtained after flash column chromatography (9:1 to 7:3 hexane–EtOAc) as a yellowish oil:  $[\alpha]_D^{23} - 42.4$  (*c* 1.0, CHCl<sub>3</sub>); IR (NaCl): 3417 (OH) cm<sup>-1</sup>; <sup>1</sup>H NMR (400 MHz, CDCl<sub>3</sub>, COSY, *g*-HSQC)  $\delta$

7.40-7.38 (m, 2H, ArH), 7.33-7.26 (m, 3H, ArH), 4.11-4.08 (m, 1H, CHCH<sub>2</sub>O), 3.87 (dd, *J* = 10.8, 5.6 Hz, 1H, CHCH<sub>2</sub>O), 3.73 (dd, *J* = 10.8, 3.6 Hz, 1H, CHCH<sub>2</sub>O), 2.97-2.94 (m, 2H, H-2), 2.62 (br s, 1H, OH), 2.02-1.94 (m, 2H, H-8 and H-8a), 1.75- 1.68 (m, 1H, H-3), 1.65-1.58 (m, 2H, H-5 and H-7), 1.49-1.45 (m, 2H, H-4), 1.42-1.37 (m, 1H, H-3), 1.21-1.15 (m, 2H, H-4a and H-6), 1.13-1.03 (m, 1H, H-6), 0.88 (d, *J* = 5.6 Hz, 3H, CH<sub>3</sub>C-8), 0.75 (d, *J* = 6.4 Hz, 3H, CH<sub>3</sub>C-5), 0.79-0.73 (m, 1H, H-7); <sup>13</sup>C NMR (100.6 MHz, CDCl<sub>3</sub>) δ 141.4 (C<sub>q</sub>-Ar), 127.5 (CH-Ar), 128.3 (CH-Ar), 128.6 (CH-Ar), 64.5 (CHCH<sub>2</sub>O), 63.6 (CHCH<sub>2</sub>O), 63.0 (C-8a), 42.9 (C-2), 35.3 (C-4a), 35.2 (C-5), 35.0 (C-7), 28.7 (C-6), 28.0 (C-8), 20.8 (C-3), 19.3 (CH<sub>3</sub>C-8), 19.2 (C-4), 18.9 (CH<sub>3</sub>C-5); HRMS calcd for [C<sub>19</sub>H<sub>29</sub>NO + H<sup>+</sup>]: 288.2322; found 288.2321.

**(4a*R*,5*R*,8*R*,8a*S*)-1-(*tert*-Butoxycarbonyl)-5,8-dimethyldecahydroquinoline (*ent*-15)**

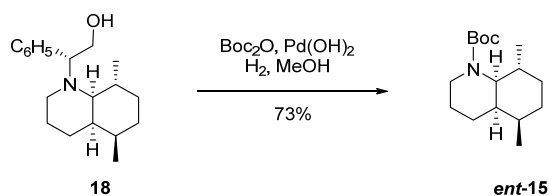

Operating as described in the preparation of decahydroquinoline **9**, from decahydroquinoline **18** (439 mg, 1.53 mmol), Boc<sub>2</sub>O (900 mg, 4.12 mmol), and 40% Pd(OH)<sub>2</sub> (176 mg) in CH<sub>3</sub>OH (35 mL), decahydroquinoline *ent*-**15** (300 mg, 73%) was obtained after flash column chromatography (99:1 to 95:5 hexane–Et<sub>2</sub>O) as a yellowish oil: [α]<sub>D</sub><sup>23</sup> + 23.3 (*c* 1.03, CHCl<sub>3</sub>).

**II) Supplementary schemes, figures and tables**



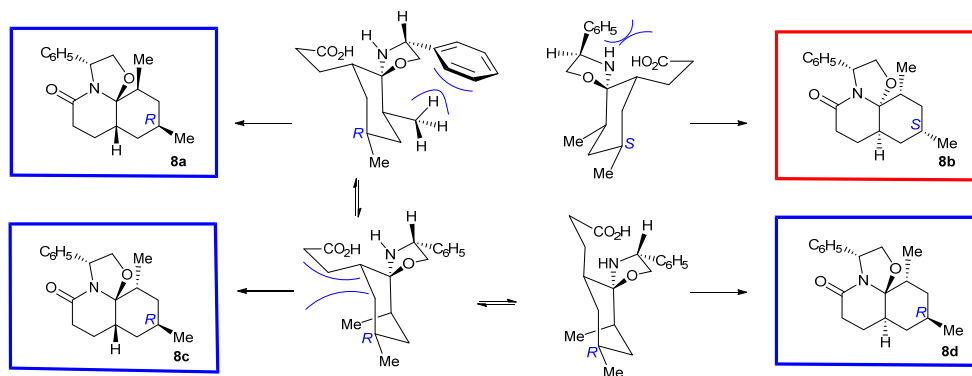

**Scheme S1.** Stereochemical outcome of the cyclocondensation reaction of keto-acid **5**

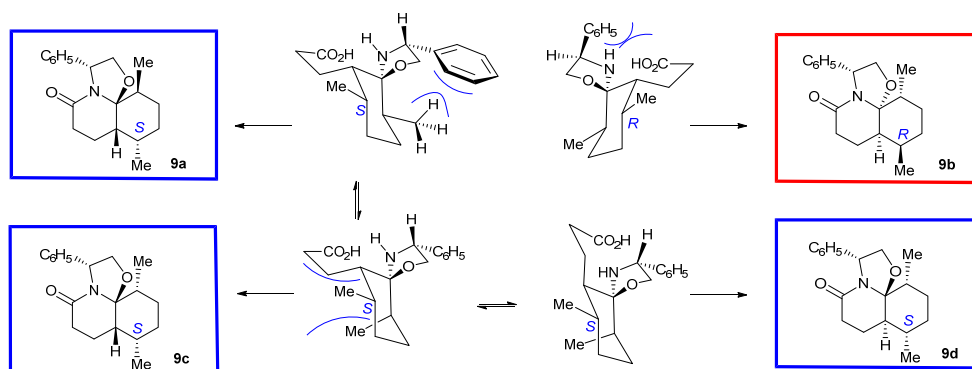

**Scheme S2.** Stereochemical outcome of the cyclocondensation reaction of keto-acid **6**

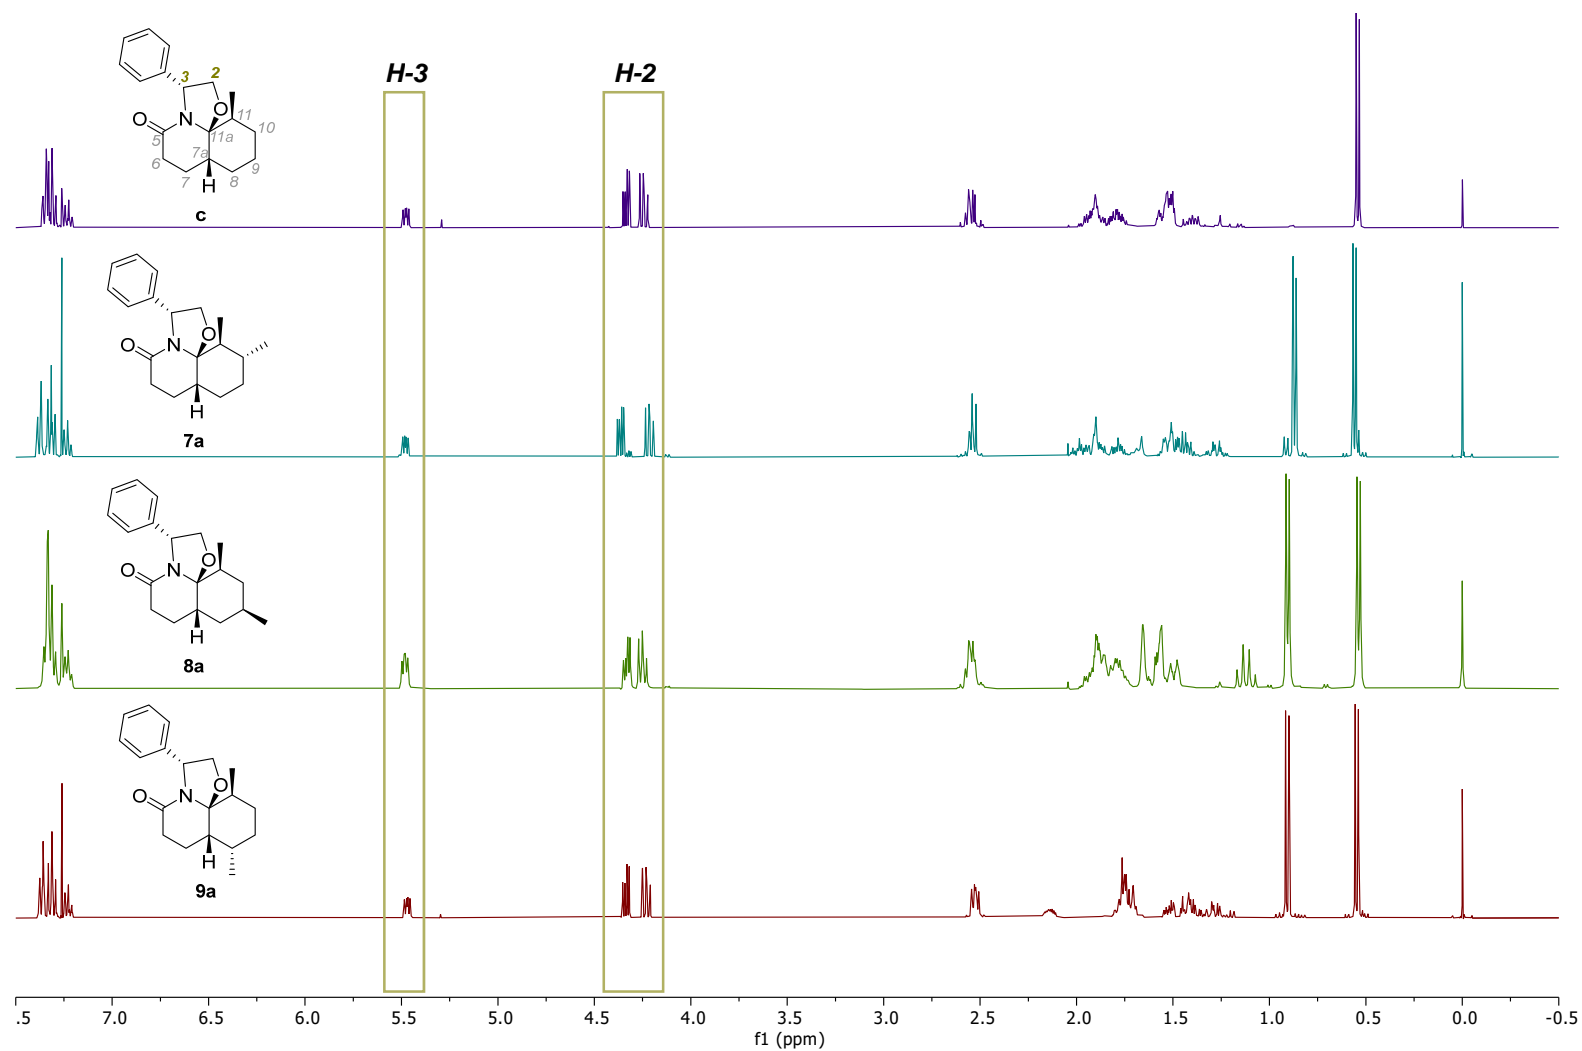

**Figure S1.** Stacked  $^1\text{H}$  NMR spectra of **c** and **7a-9a** displaying diagnostic signals

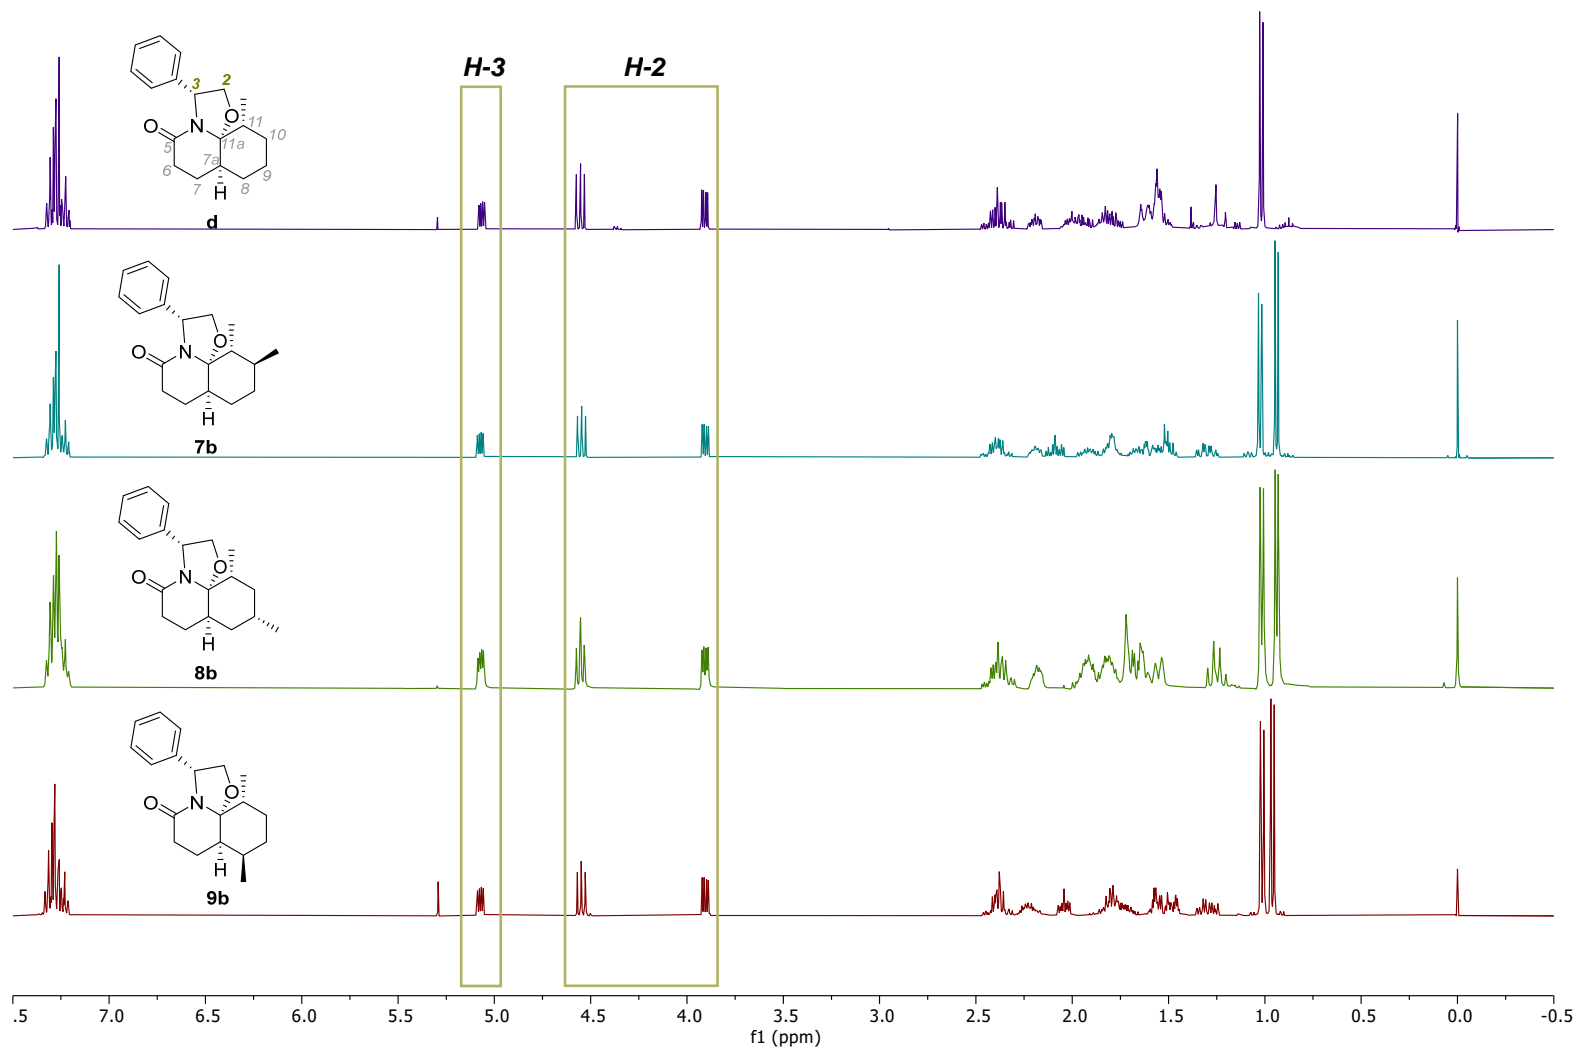

Figure S2. Stacked  $^1\text{H}$  NMR spectra of **d** and **7b-9b** displaying diagnostic signals

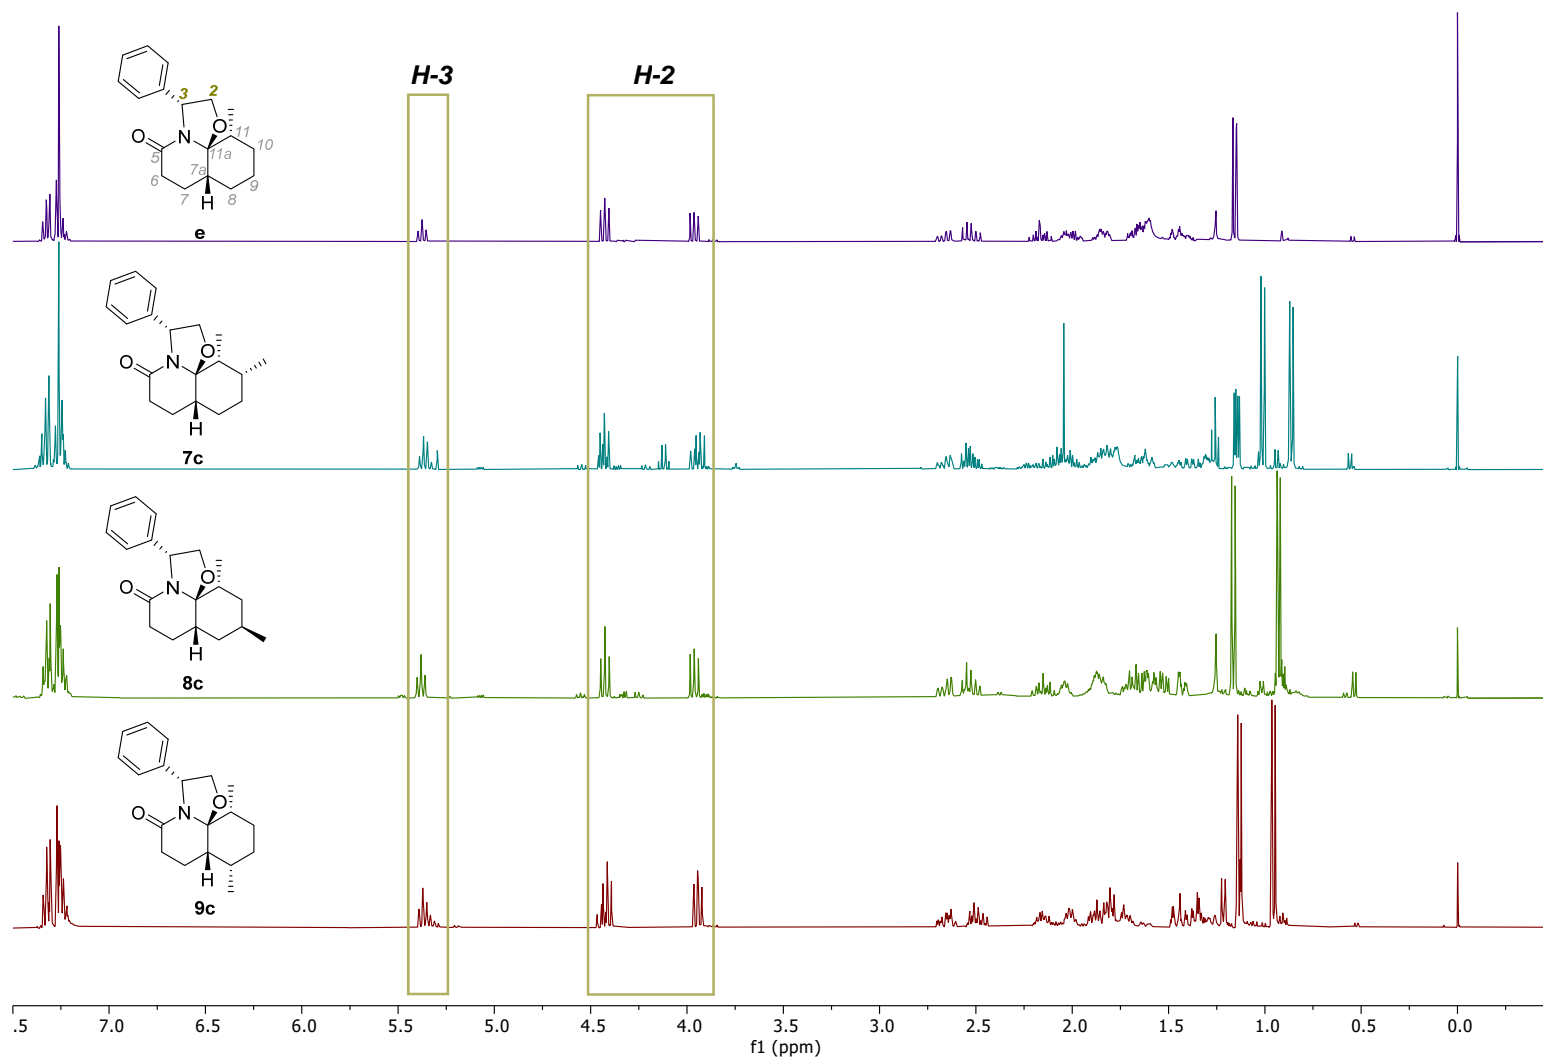

**Figure S3.**  $^1\text{H}$  NMR stacked spectra of **e** and **7c-9c** displaying diagnostic signals

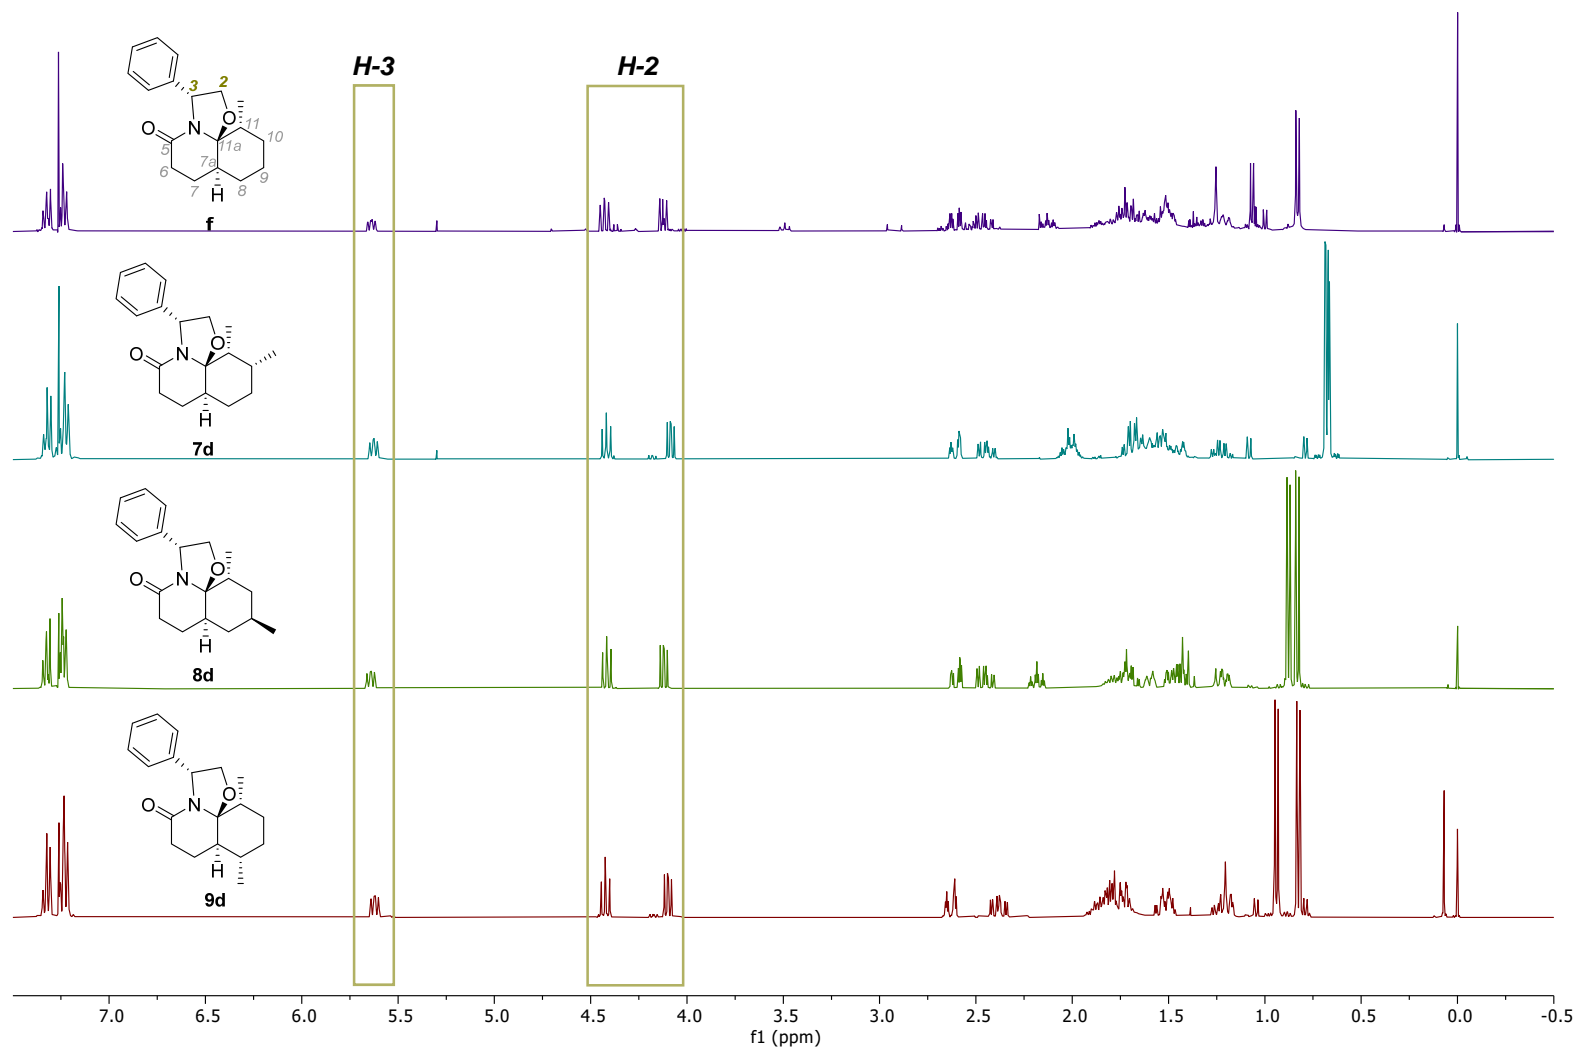

**Figure S4.**  $^1\text{H}$  NMR stacked spectra of **f** and **7d-9d** displaying diagnostic signals

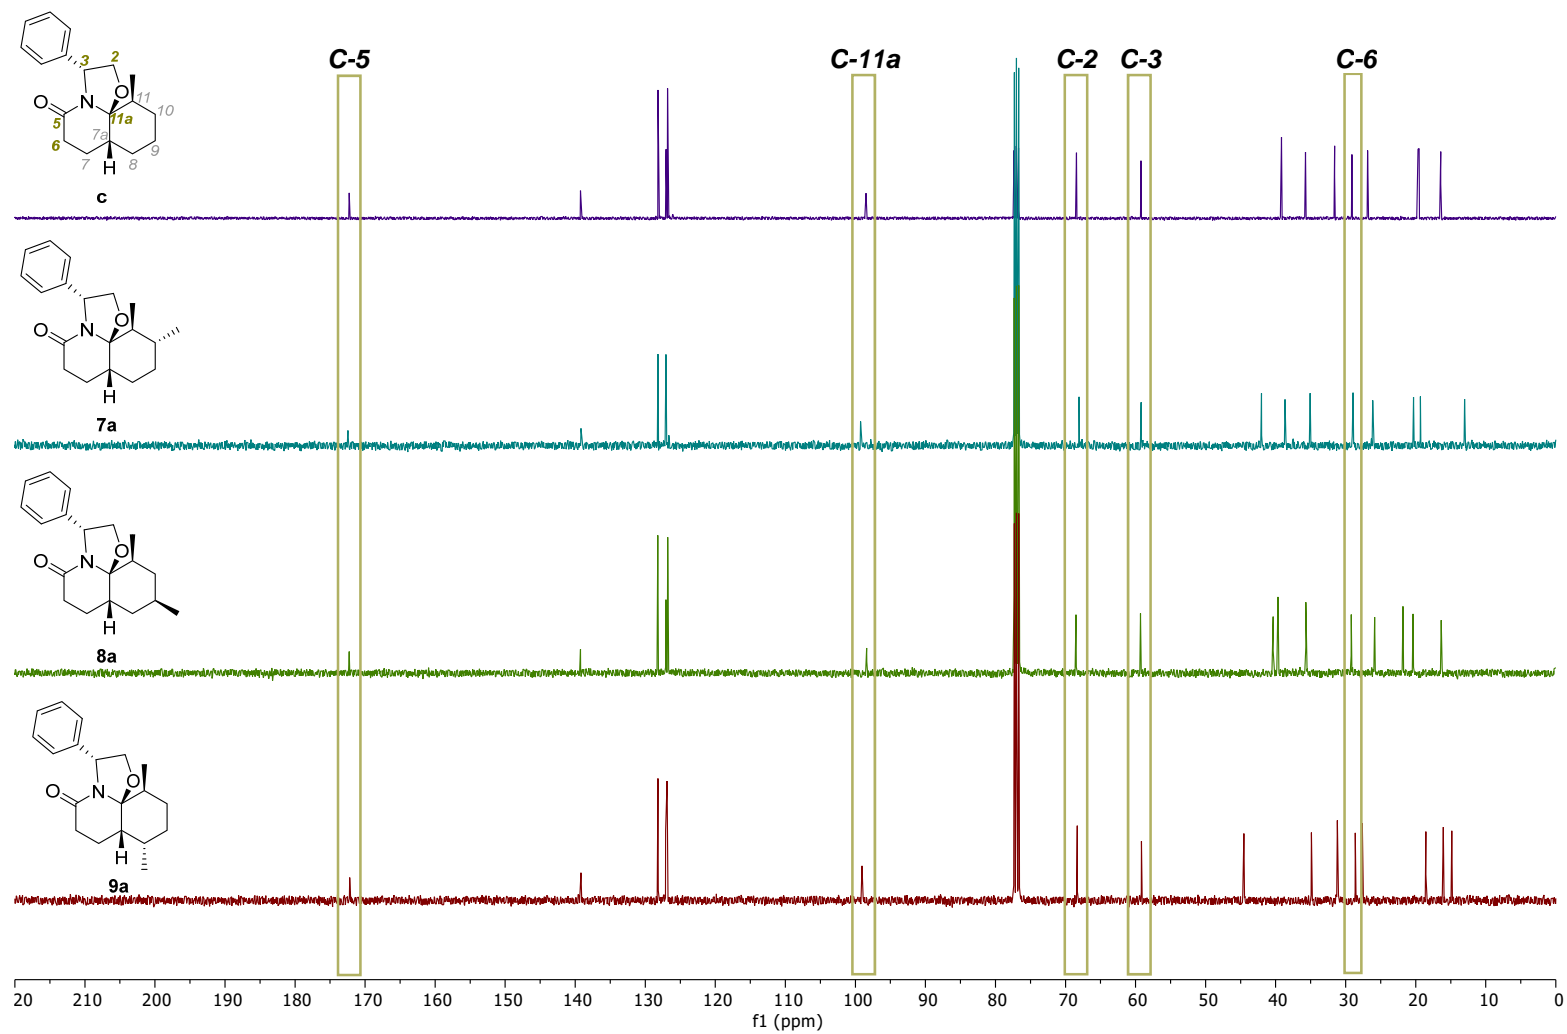

**Figure S5.** Stacked  $^{13}\text{C}$  NMR spectra of **c** and **7a-9a** displaying diagnostic signals

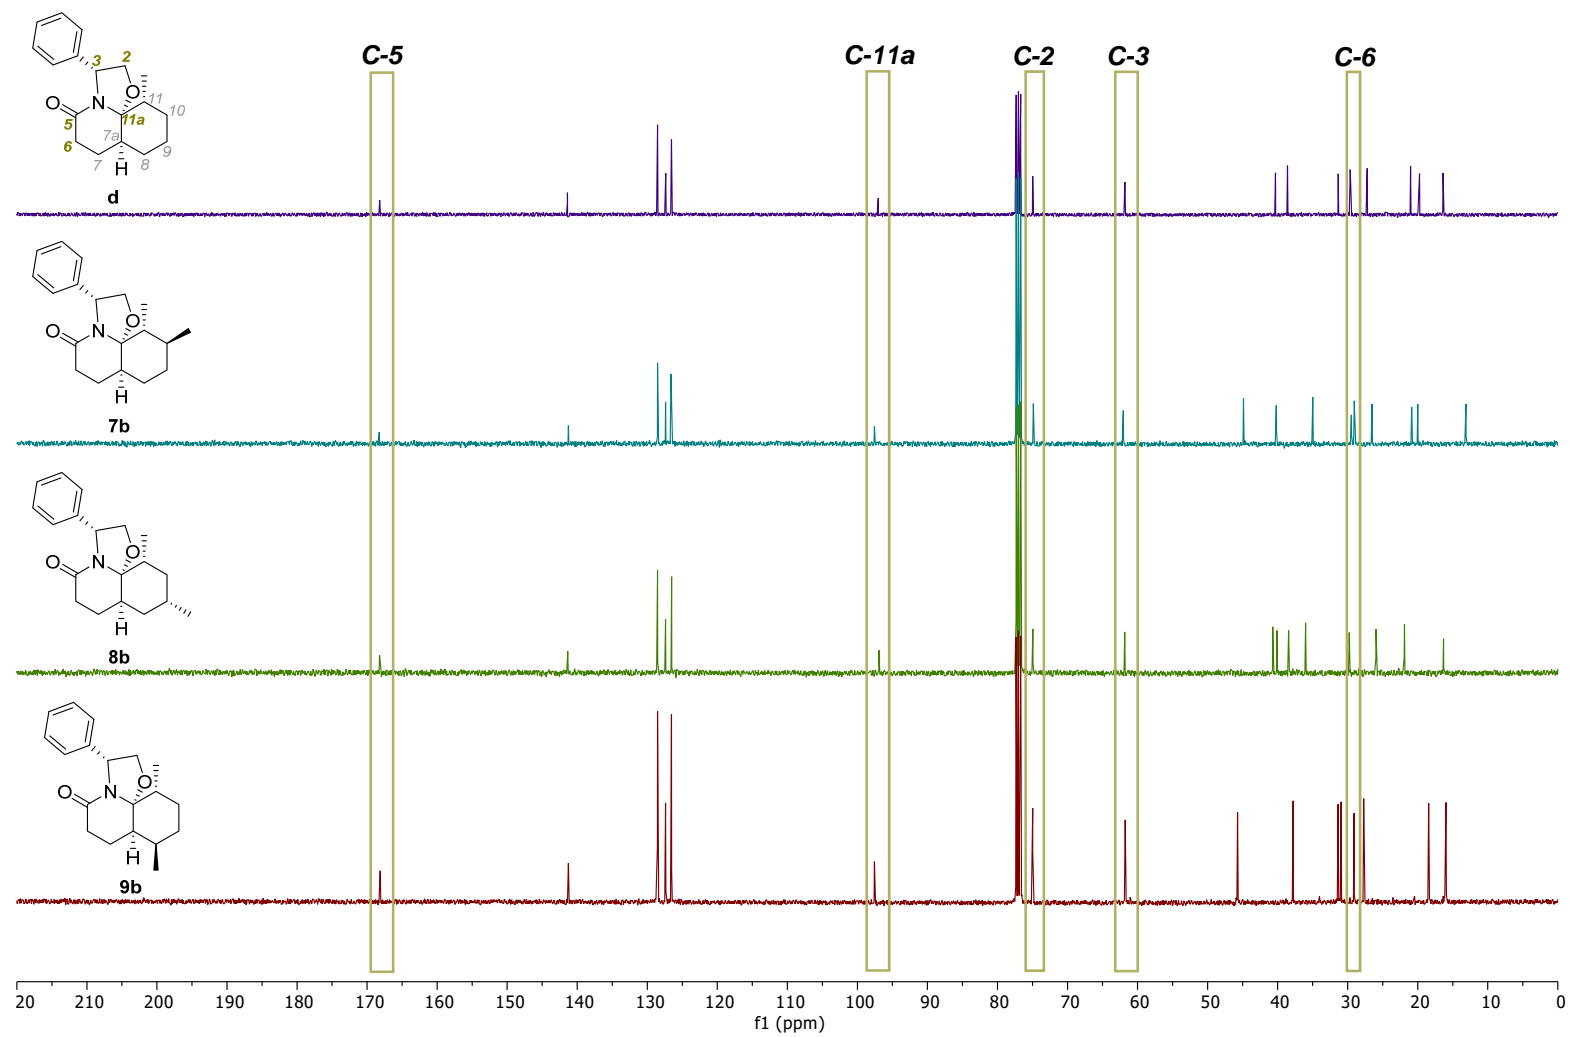

Figure S6. Stacked  $^{13}\text{C}$  NMR spectra of **d** and **7b-9b** displaying diagnostic signals

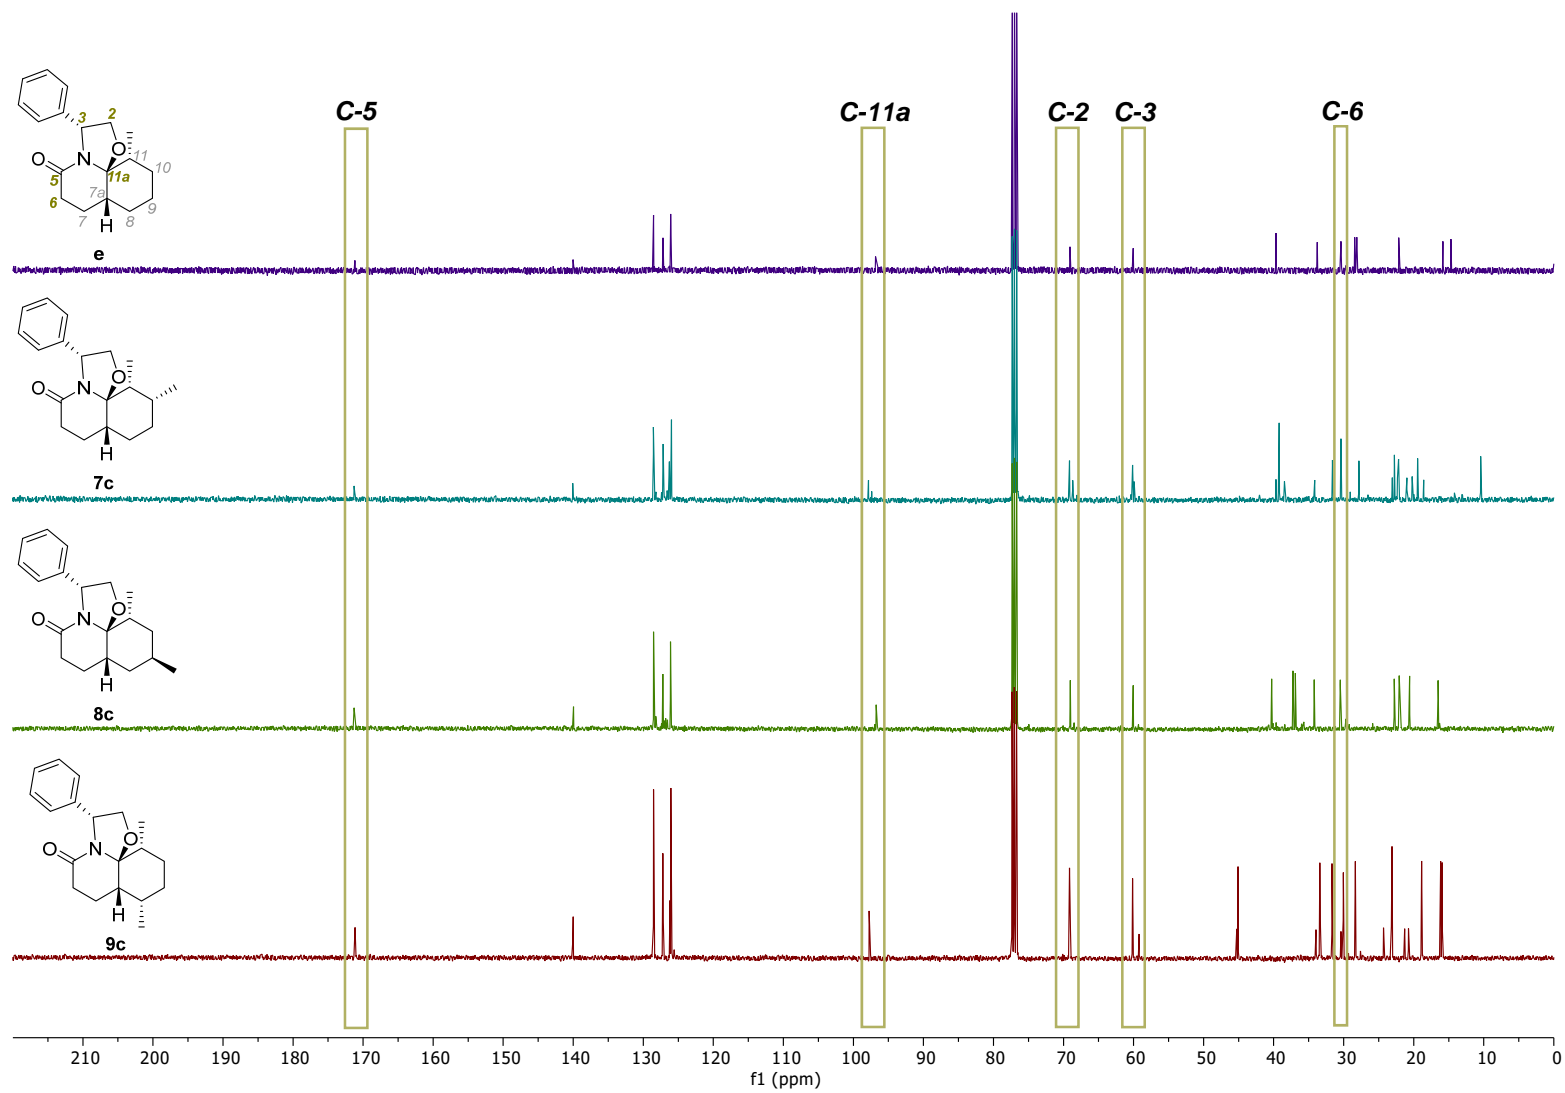

Figure S7. Stacked  $^{13}\text{C}$  NMR spectra of **e** and **7c-9c** displaying diagnostic signals



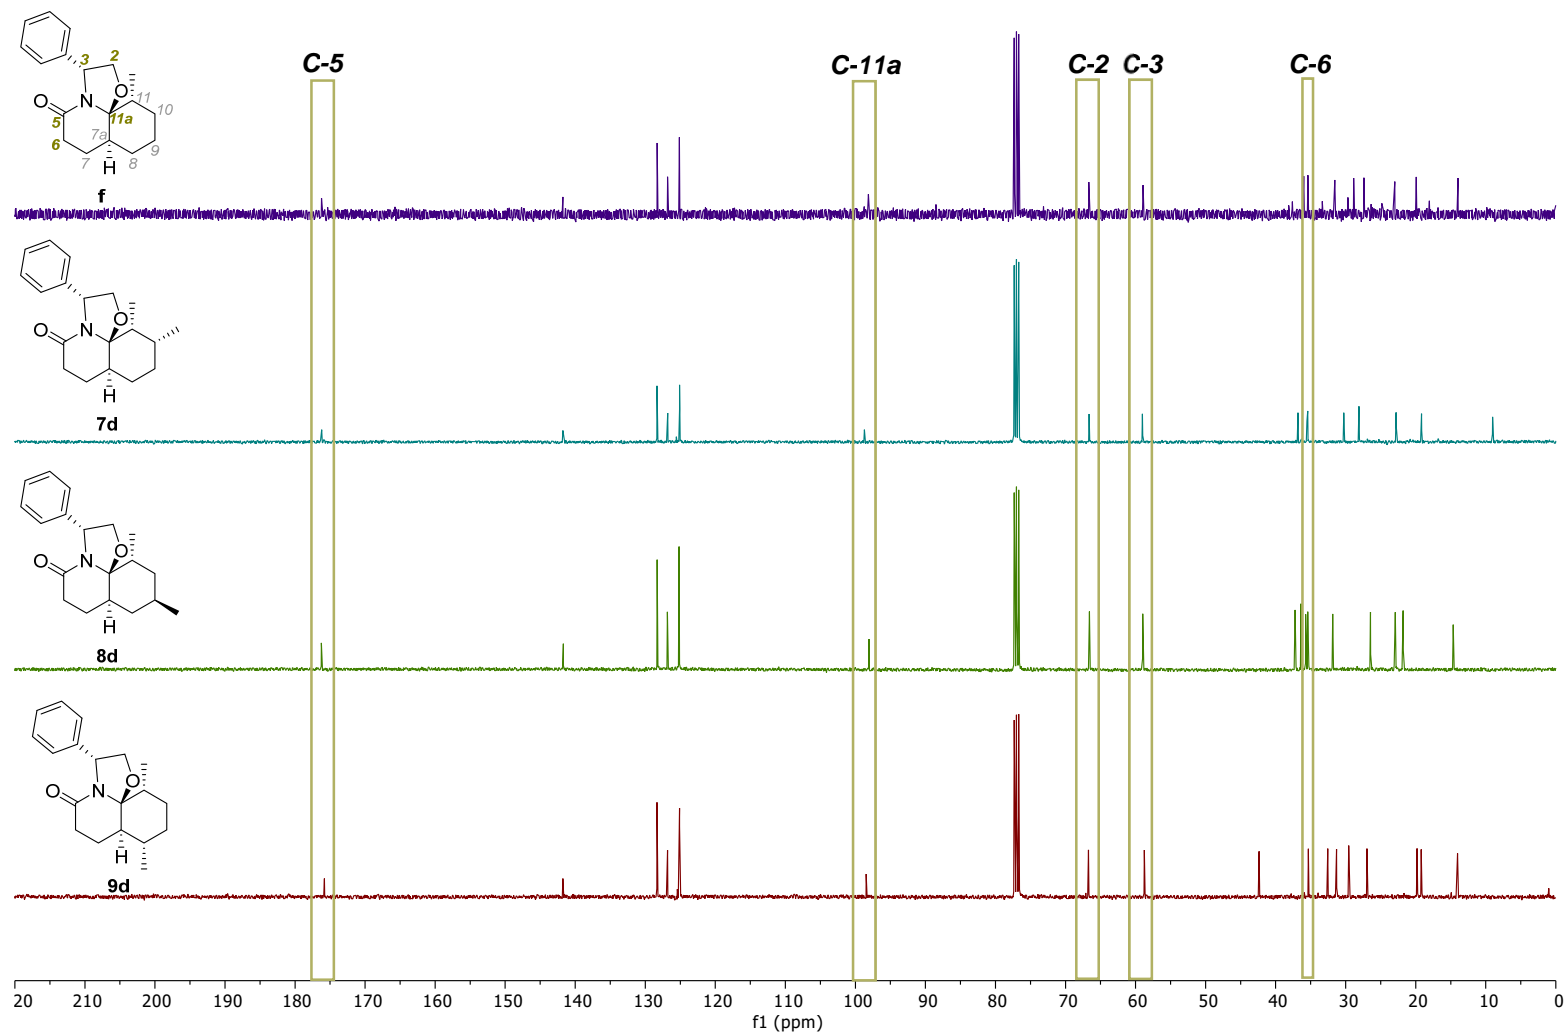

**Figure S8.** Stacked  $^{13}\text{C}$  NMR spectra of **f** and **7d-9d** displaying diagnostic signals

|                                                                                                      | C-2  | C-3  | C-5   | C-6  | C-7  | C-7a | C-8  | C-9  | C-10 | C-11 | C-11a | CH <sub>3</sub> C-11 | CH <sub>3</sub> C-8/9/10 |
|------------------------------------------------------------------------------------------------------|------|------|-------|------|------|------|------|------|------|------|-------|----------------------|--------------------------|
| 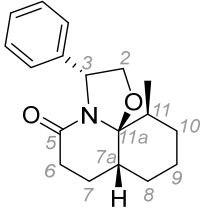 <p><b>c</b></p>    | 68.4 | 59.2 | 172.2 | 29.1 | 19.5 | 39.1 | 26.8 | 19.7 | 31.6 | 35.7 | 98.5  | 16.4                 | -                        |
|  <p><b>7a</b></p>   | 68.1 | 59.2 | 172.4 | 29.0 | 19.3 | 38.7 | 26.1 | 28.9 | 35.1 | 42.0 | 99.3  | 13.0                 | 20.3                     |
|  <p><b>8a</b></p>   | 68.4 | 59.2 | 172.1 | 29.1 | 20.3 | 39.6 | 35.6 | 25.8 | 40.3 | 35.5 | 98.3  | 16.3                 | 21.8                     |
|  <p><b>9a</b></p> | 68.3 | 59.2 | 172.2 | 28.6 | 14.9 | 44.5 | 31.2 | 31.2 | 27.6 | 34.9 | 99.1  | 16.1                 | 18.6                     |

**Table S1.** <sup>13</sup>C NMR chemical shift values of **c** and **7a-9a**

|                                                                                                     | C-2  | C-3  | C-5   | C-6  | C-7  | C-7a | C-8  | C-9  | C-10 | C-11 | C-11a | CH <sub>3</sub> C-11 | CH <sub>3</sub> C-8/9/10 |
|-----------------------------------------------------------------------------------------------------|------|------|-------|------|------|------|------|------|------|------|-------|----------------------|--------------------------|
| 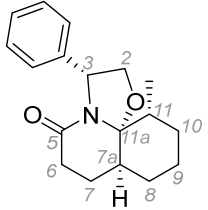 <p><b>d</b></p>   | 74.9 | 61.8 | 168.2 | 29.6 | 21.0 | 40.3 | 27.2 | 19.7 | 31.3 | 38.6 | 97.0  | 16.4                 | -                        |
|  <p><b>7b</b></p>  | 74.9 | 62.0 | 168.3 | 29.5 | 20.9 | 40.2 | 26.5 | 29.1 | 35.0 | 44.9 | 97.6  | 20.0                 | 13.1                     |
|  <p><b>8b</b></p>  | 74.8 | 61.7 | 168.1 | 29.7 | 21.8 | 40.6 | 35.9 | 38.2 | 40.0 | 25.9 | 96.8  | 16.2                 | 21.8                     |
|  <p><b>9b</b></p> | 75.0 | 61.8 | 168.1 | 29.1 | 16   | 45.7 | 37.8 | 31.0 | 27.7 | 31.4 | 97.6  | 18.4                 | 16.1                     |

**Table S2.** <sup>13</sup>C NMR chemical shift values of **d** and **7b-9b**

|                                                                                                     | C-2  | C-3  | C-5   | C-6  | C-7  | C-7a | C-8  | C-9  | C-10 | C-11 | C-11a | CH <sub>3</sub> C-11 | CH <sub>3</sub> C-8/9/10 |
|-----------------------------------------------------------------------------------------------------|------|------|-------|------|------|------|------|------|------|------|-------|----------------------|--------------------------|
| 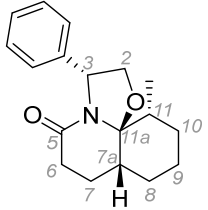 <p><b>e</b></p>   | 69.1 | 60.0 | 171.2 | 30.4 | 22.1 | 39.7 | 28.1 | 28.4 | 14.7 | 33.8 | 96.8  | 15.8                 | -                        |
|  <p><b>7c</b></p>  | 69.1 | 60.1 | 171.5 | 30.4 | 22.7 | 39.2 | 27.8 | 22.8 | 31.6 | 39.2 | 97.8  | 10.4                 | 19.4                     |
|  <p><b>8c</b></p>  | 69.0 | 60.0 | 171.3 | 30.5 | 22.8 | 40.3 | 37.2 | 20.6 | 36.9 | 34.2 | 96.7  | 16.5                 | 22.1                     |
|  <p><b>9c</b></p> | 69.1 | 60.1 | 171.1 | 30.0 | 16.1 | 45.1 | 31.7 | 28.3 | 23.1 | 33.4 | 97.7  | 15.9                 | 18.9                     |

**Table S3.** <sup>13</sup>C NMR chemical shift values of **e** and **7c-9c**

|                                                                                                     | C-2  | C-3  | C-5   | C-6  | C-7  | C-7a | C-8  | C-9  | C-10 | C-11 | C-11a | CH <sub>3</sub> C-11 | CH <sub>3</sub> C-8/9/10 |
|-----------------------------------------------------------------------------------------------------|------|------|-------|------|------|------|------|------|------|------|-------|----------------------|--------------------------|
| 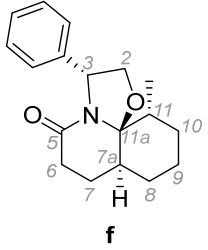 <p><b>f</b></p>   | 66.7 | 58.9 | 176.2 | 35.4 | 23.0 | 36.0 | 28.8 | 27.4 | 19.9 | 31.5 | 98.1  | 14.0                 | -                        |
|  <p><b>7d</b></p>  | 66.6 | 59.0 | 176.2 | 35.4 | 22.8 | 36.8 | 28.1 | 28.1 | 30.3 | 35.5 | 98.7  | 19.2                 | 9.0                      |
|  <p><b>8d</b></p>  | 66.6 | 59.0 | 176.2 | 35.4 | 22.9 | 35.7 | 37.2 | 26.4 | 36.4 | 31.8 | 98.0  | 14.6                 | 21.8                     |
|  <p><b>9d</b></p> | 66.7 | 58.8 | 175.8 | 35.3 | 19.2 | 42.4 | 32.6 | 27.0 | 29.6 | 31.3 | 98.4  | 14.0                 | 19.8                     |

**Table S4.** <sup>13</sup>C NMR chemical shift values of **f** and **7d-9d**

**III) Copies of  $^1\text{H}$  and  $^{13}\text{C}$  NMR spectra**

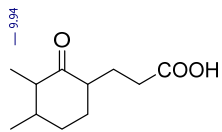

**4**  
CDCl<sub>3</sub>  
400 MHz

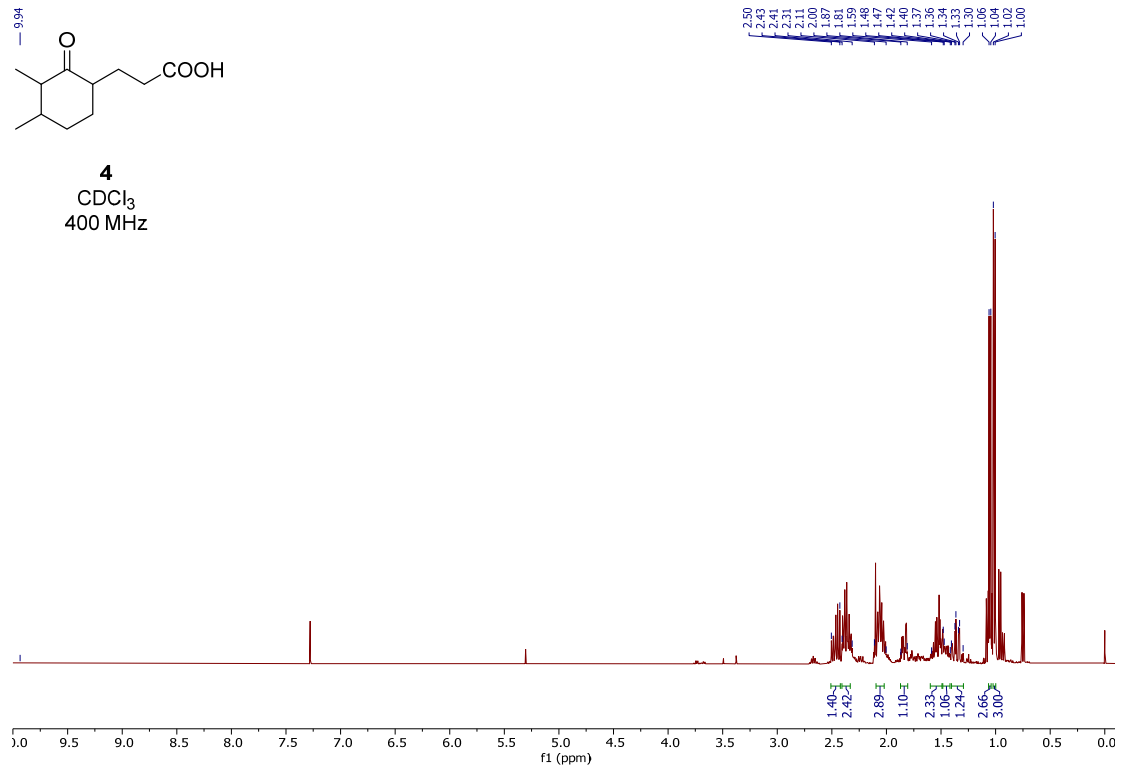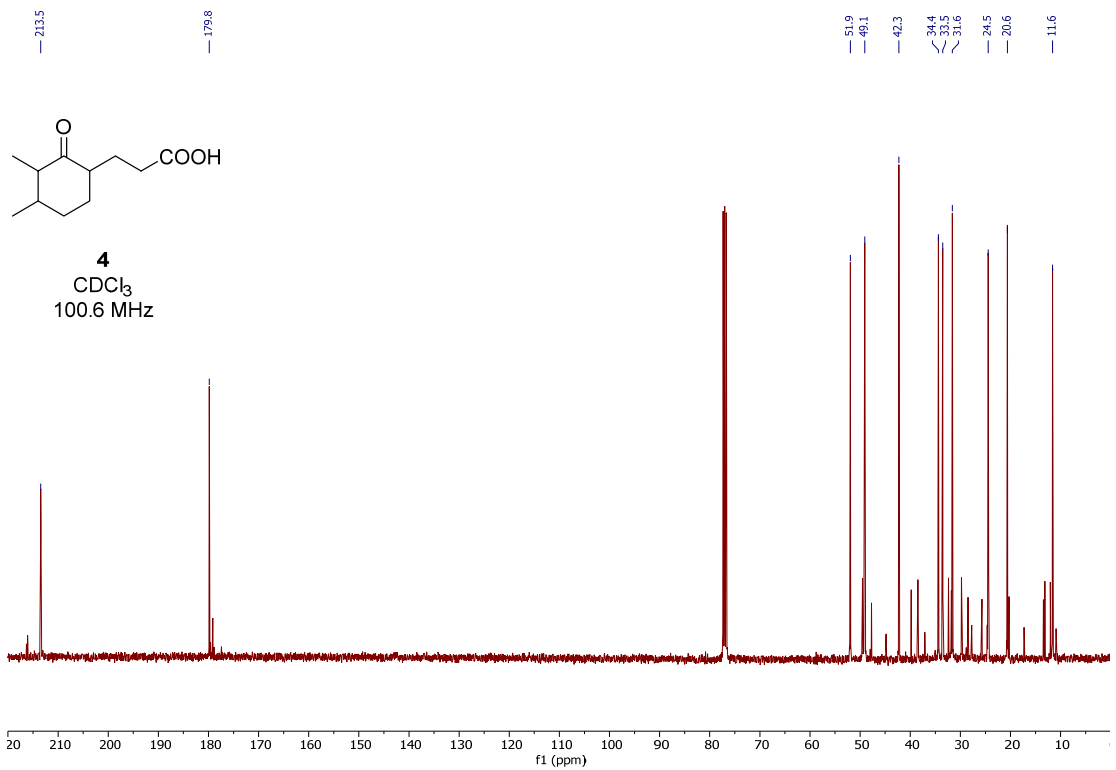

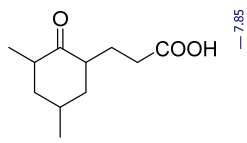

**5**  
CDCl<sub>3</sub>  
400 MHz

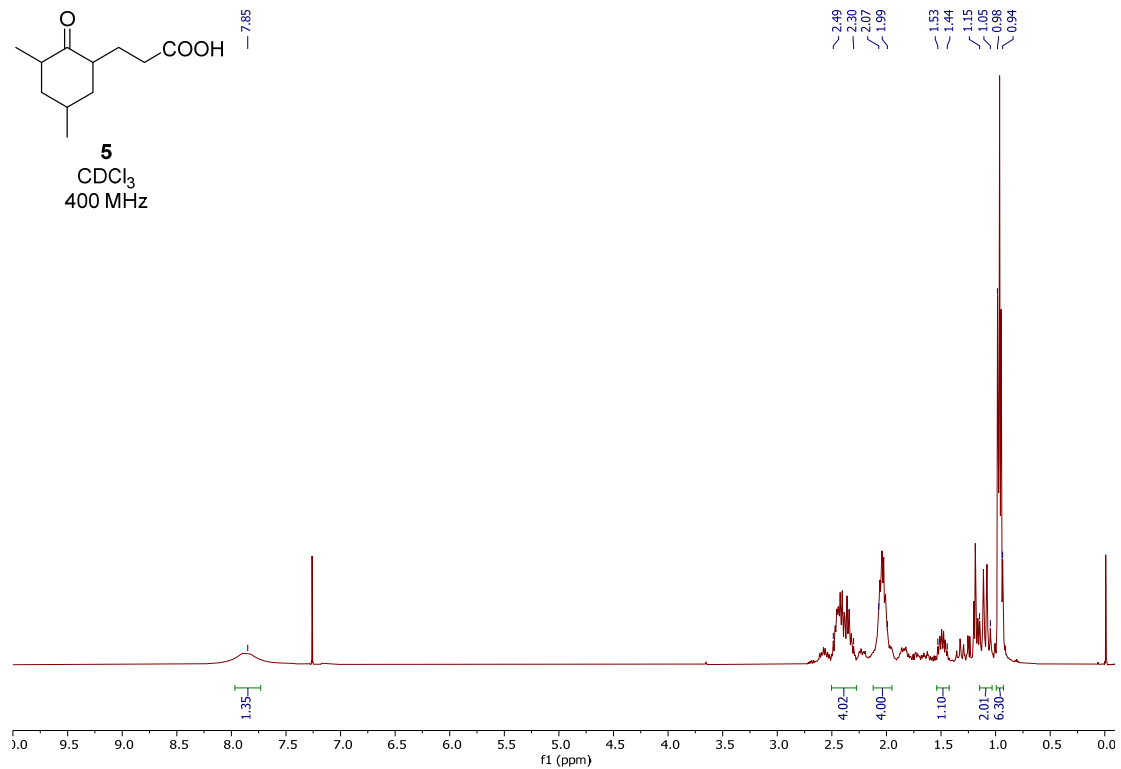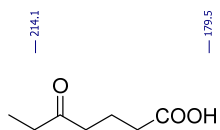

**5**  
CDCl<sub>3</sub>  
100.6 MHz

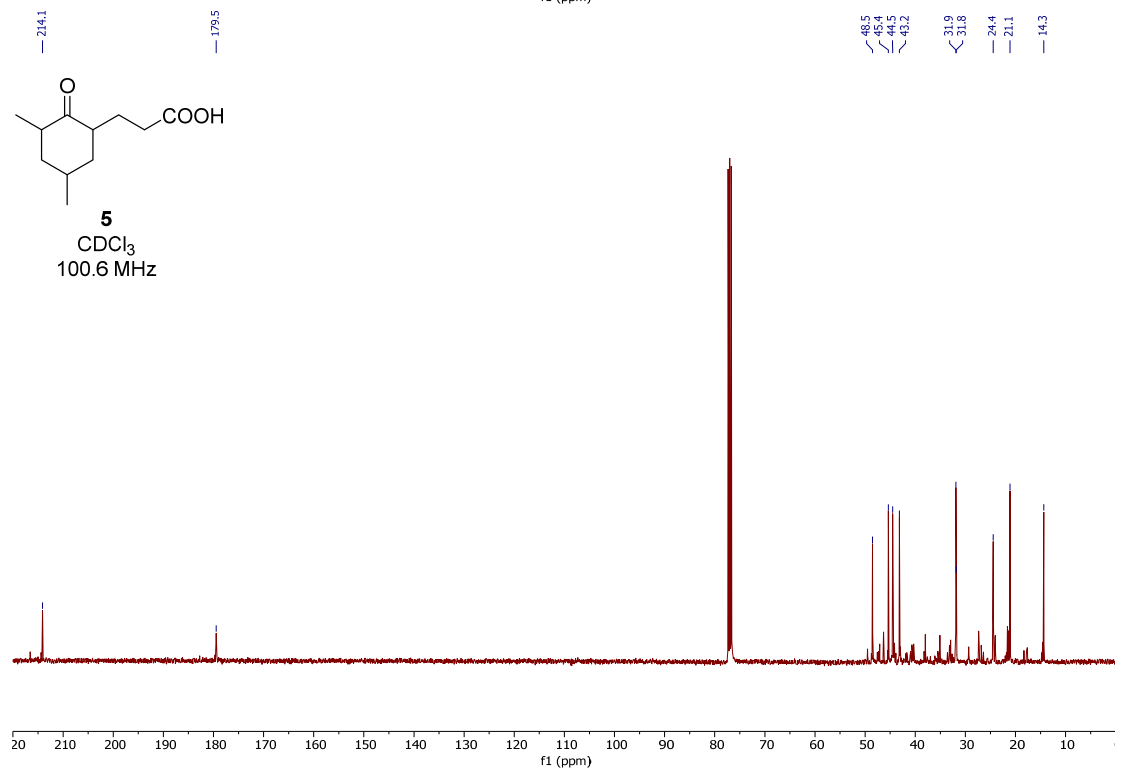



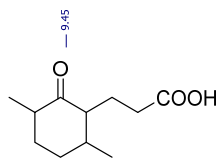

**6**  
CDCl<sub>3</sub>  
400 MHz

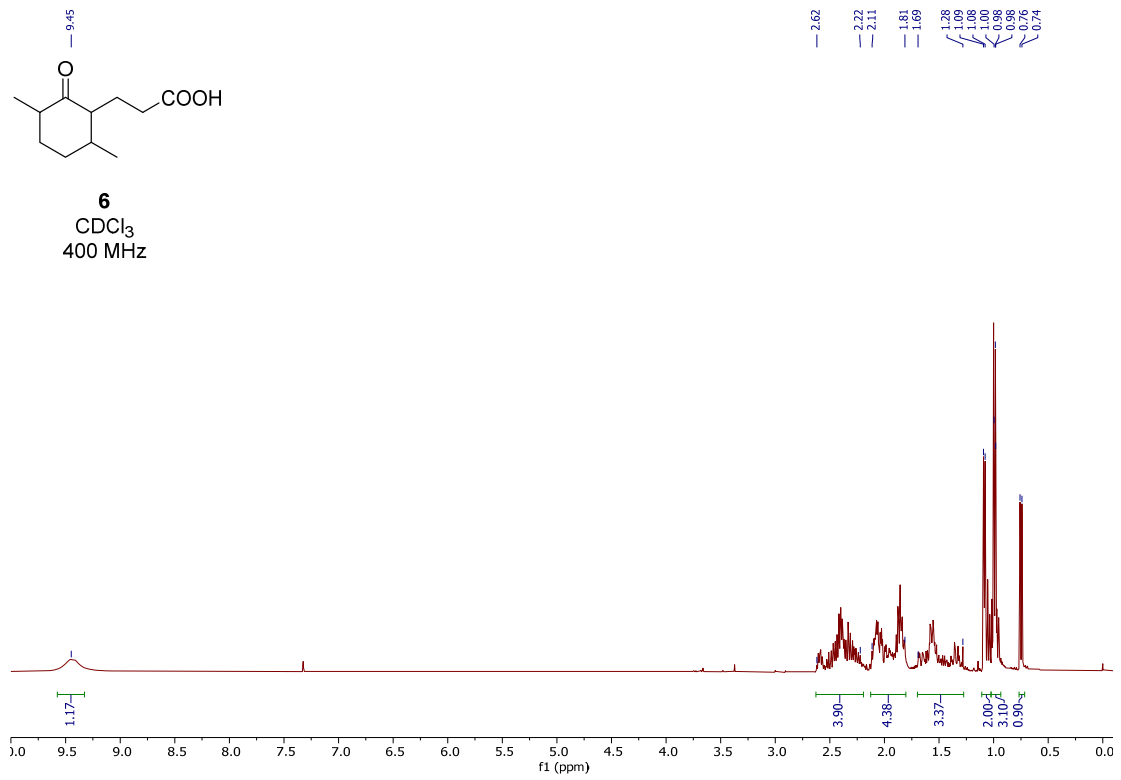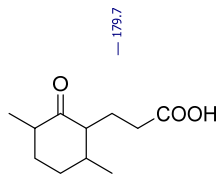

**6**  
CDCl<sub>3</sub>  
100.6 MHz

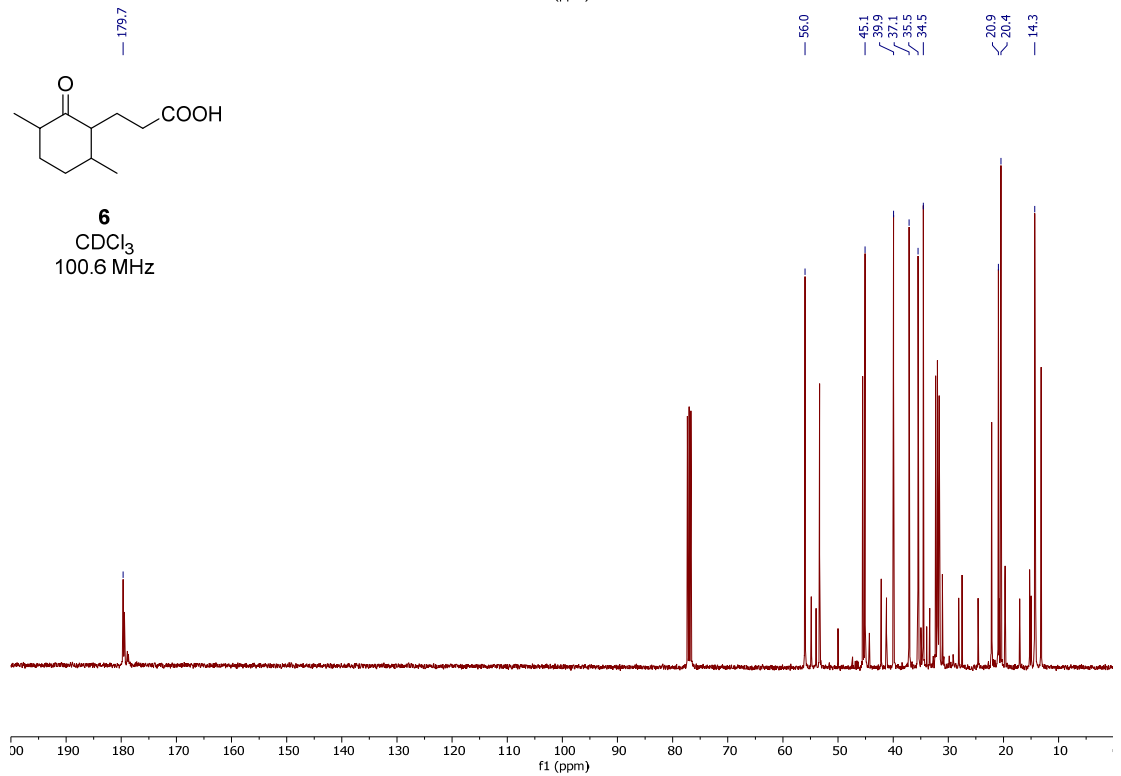

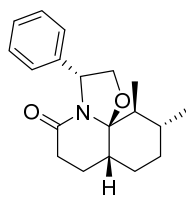

**7a**  
CDCl<sub>3</sub>  
400 MHz

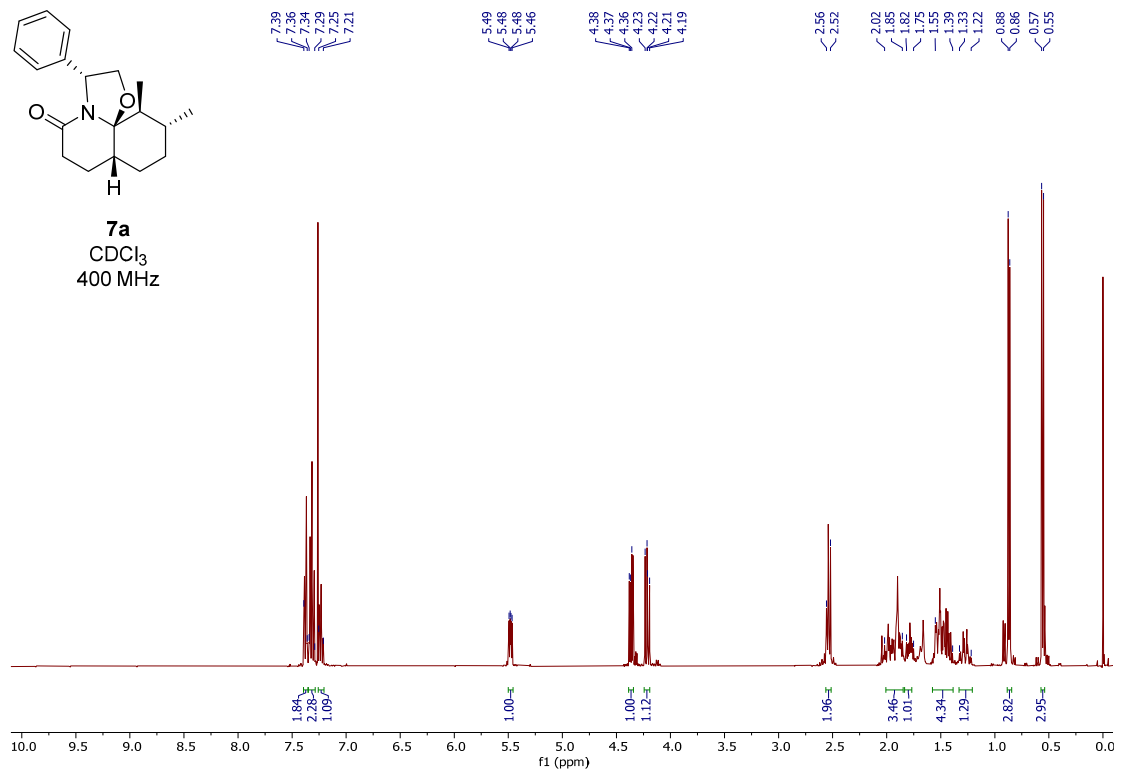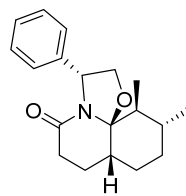

**7a**  
CDCl<sub>3</sub>  
100.6 MHz

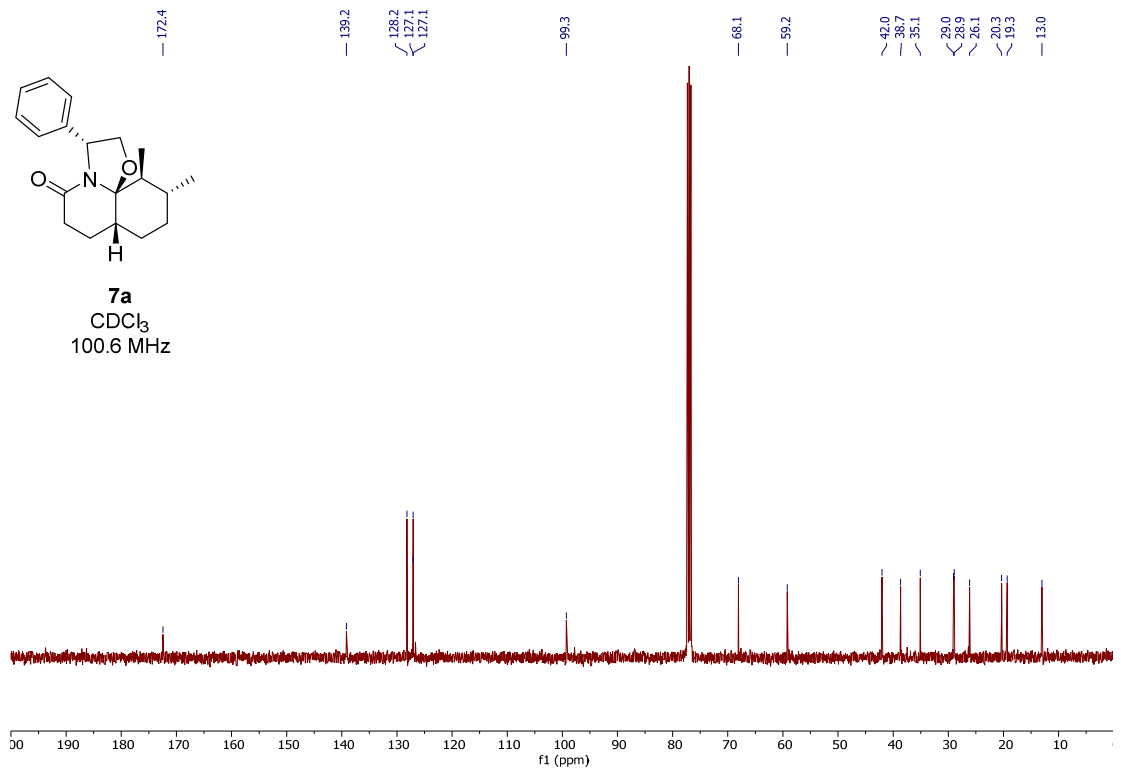

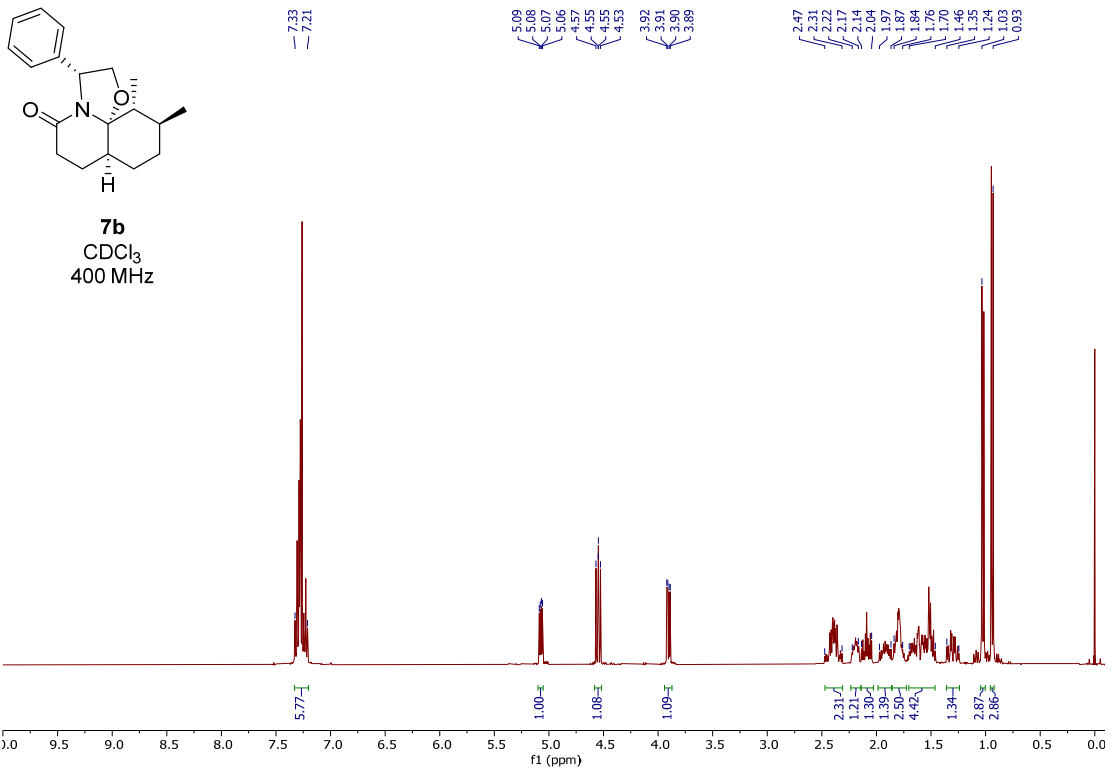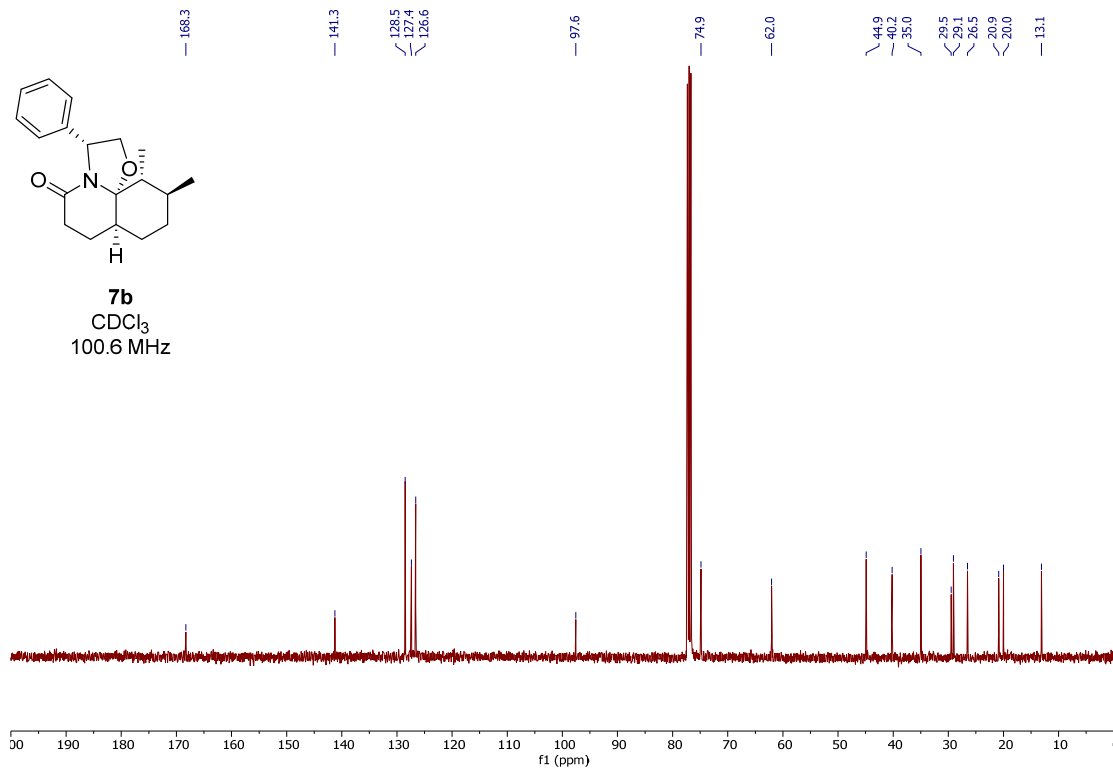

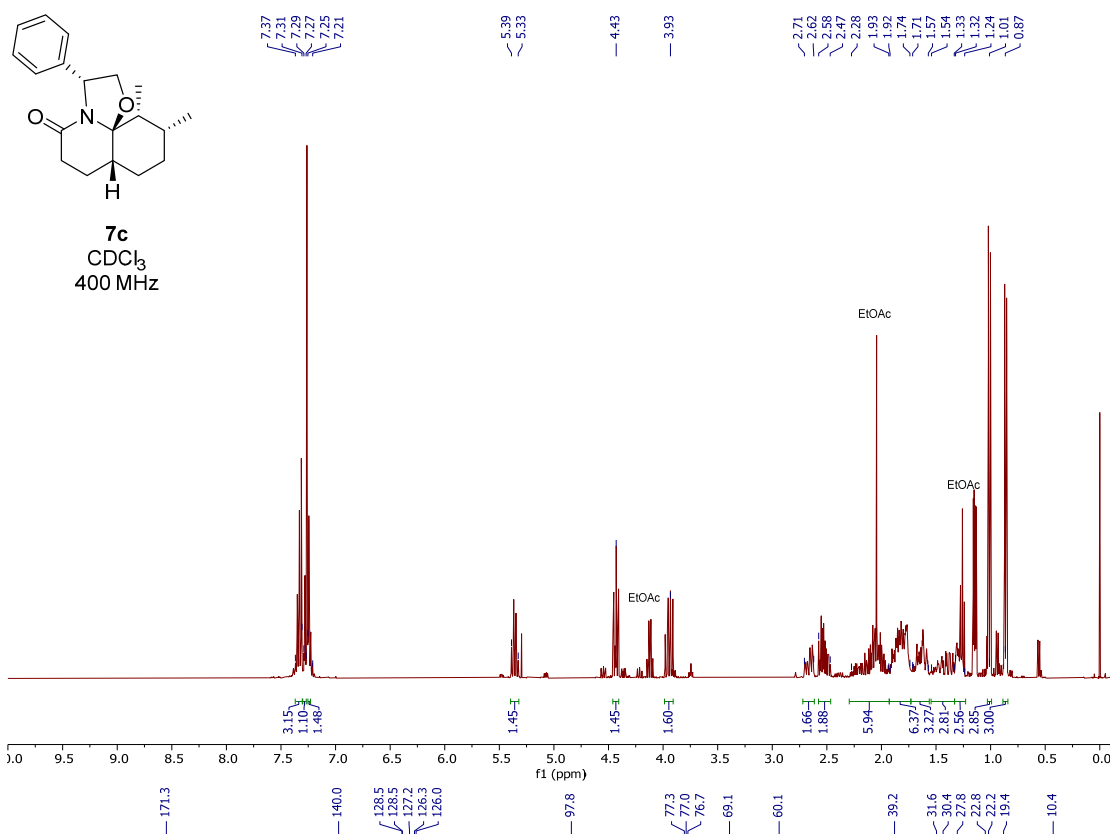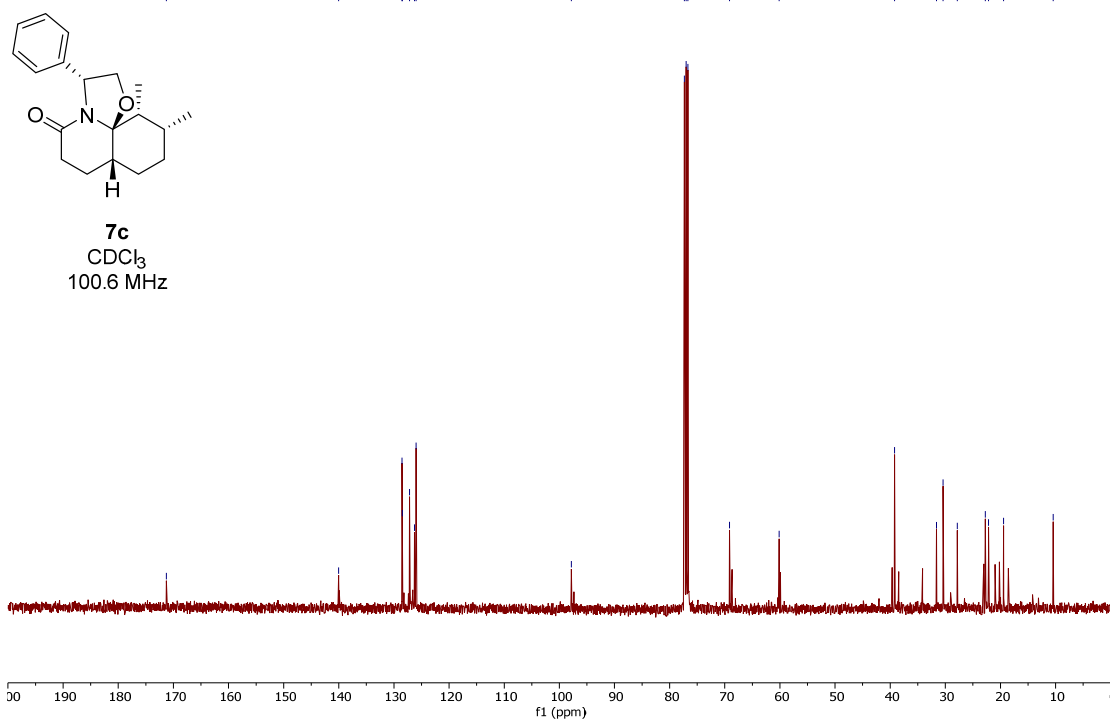

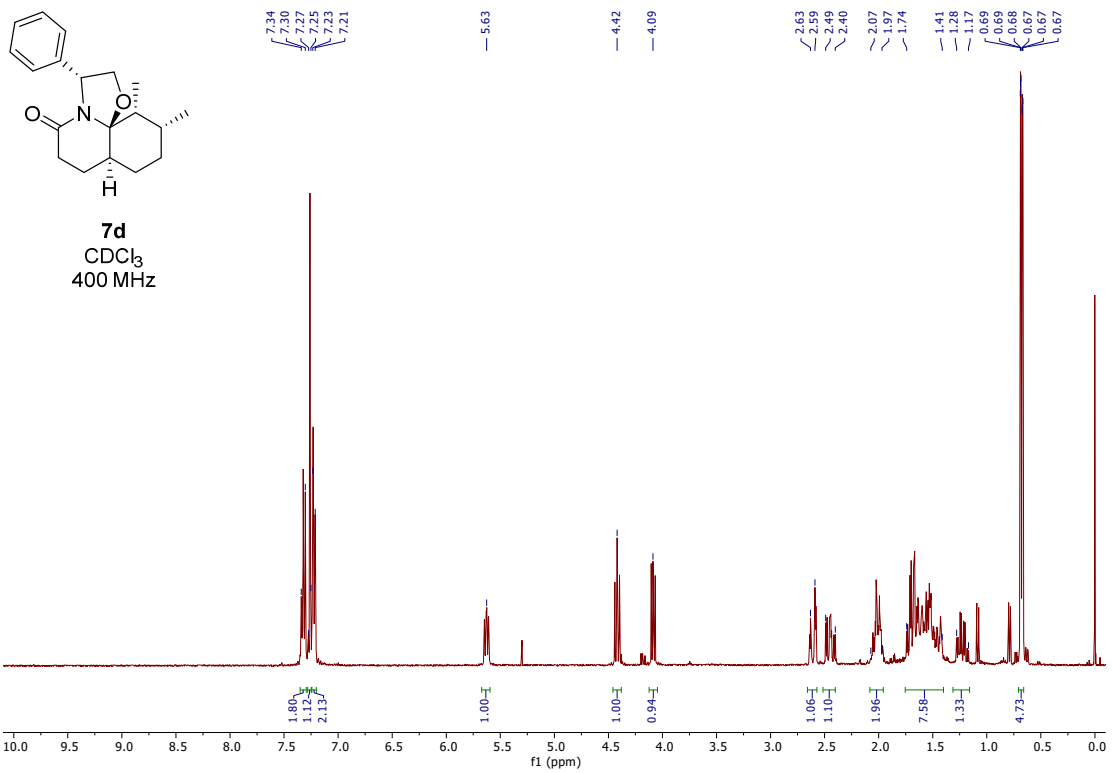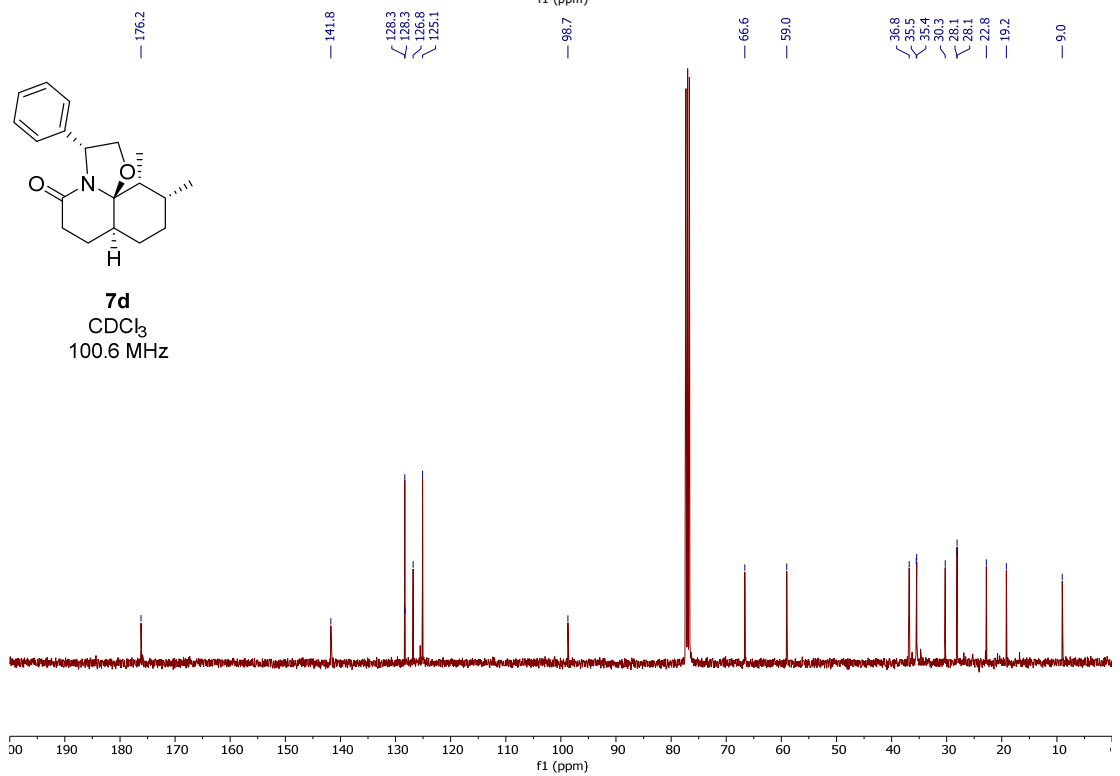

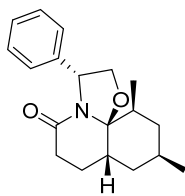

**8a**  
 CDCl<sub>3</sub>  
 400 MHz

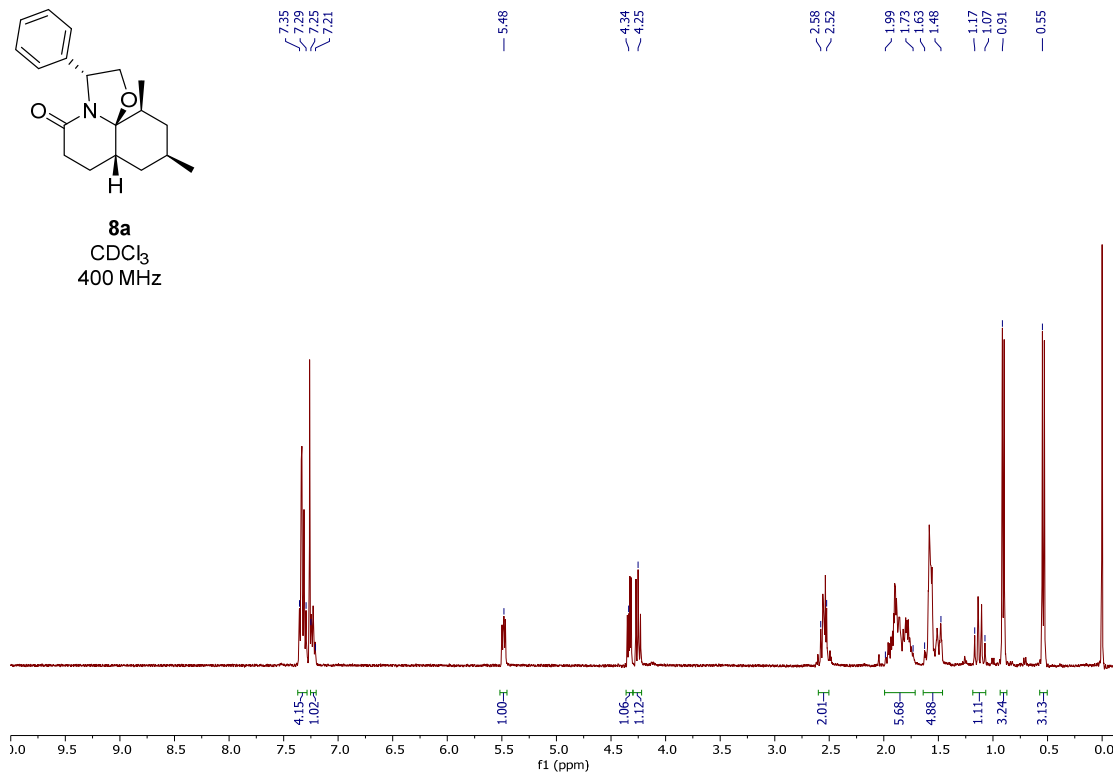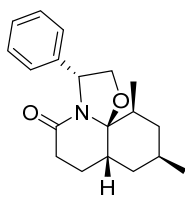

**8a**  
 CDCl<sub>3</sub>  
 100.6 MHz

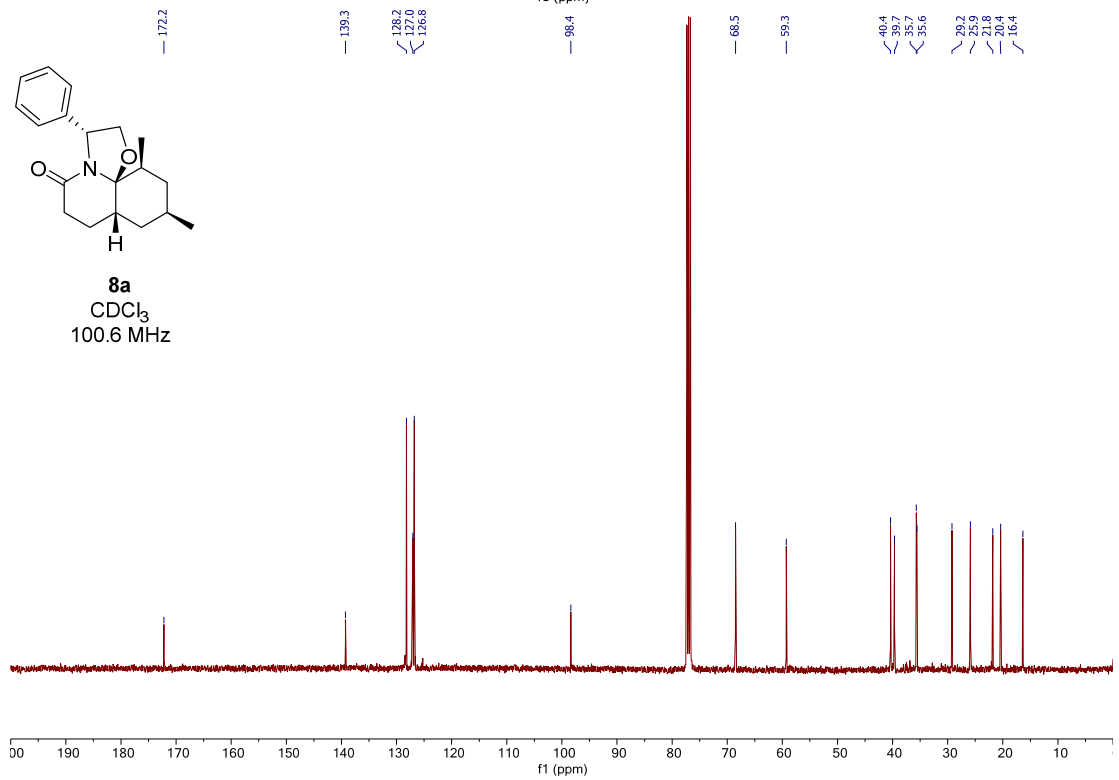

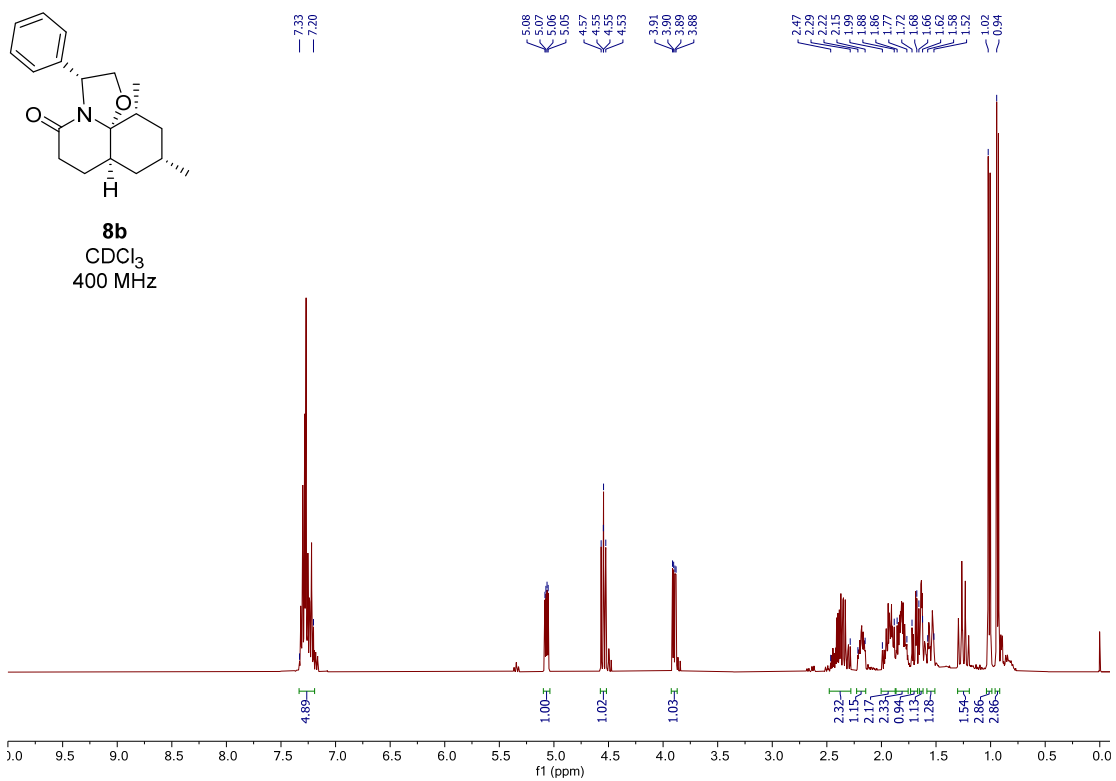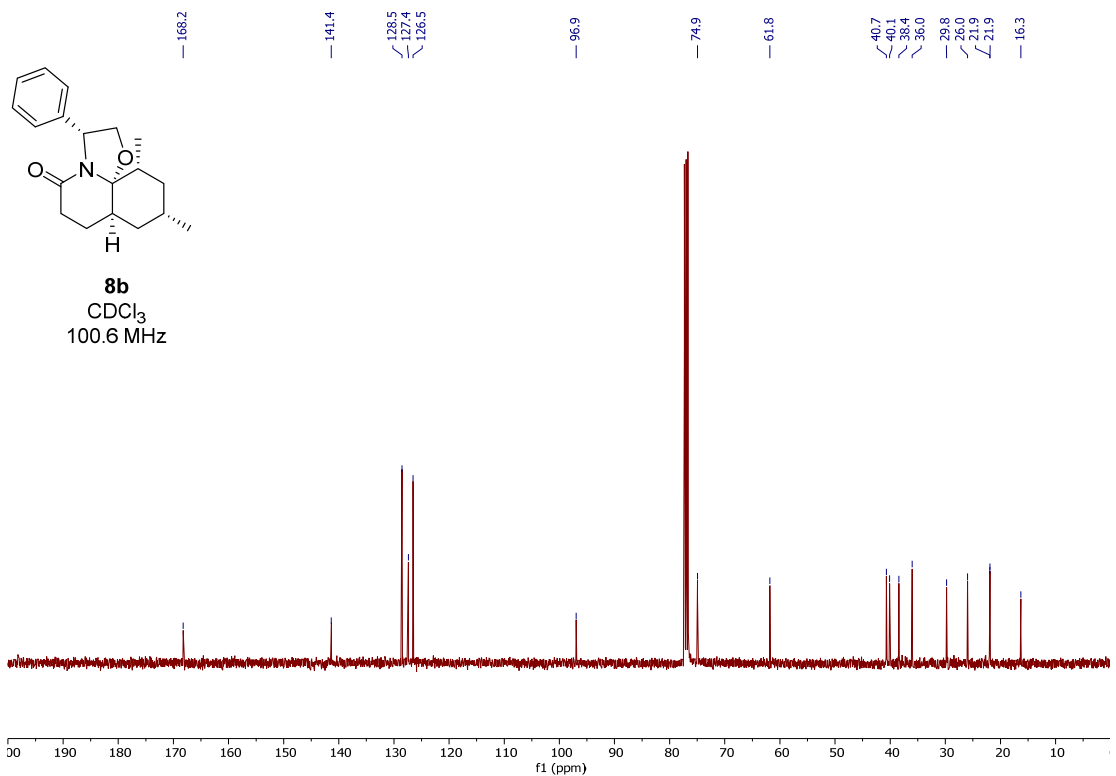

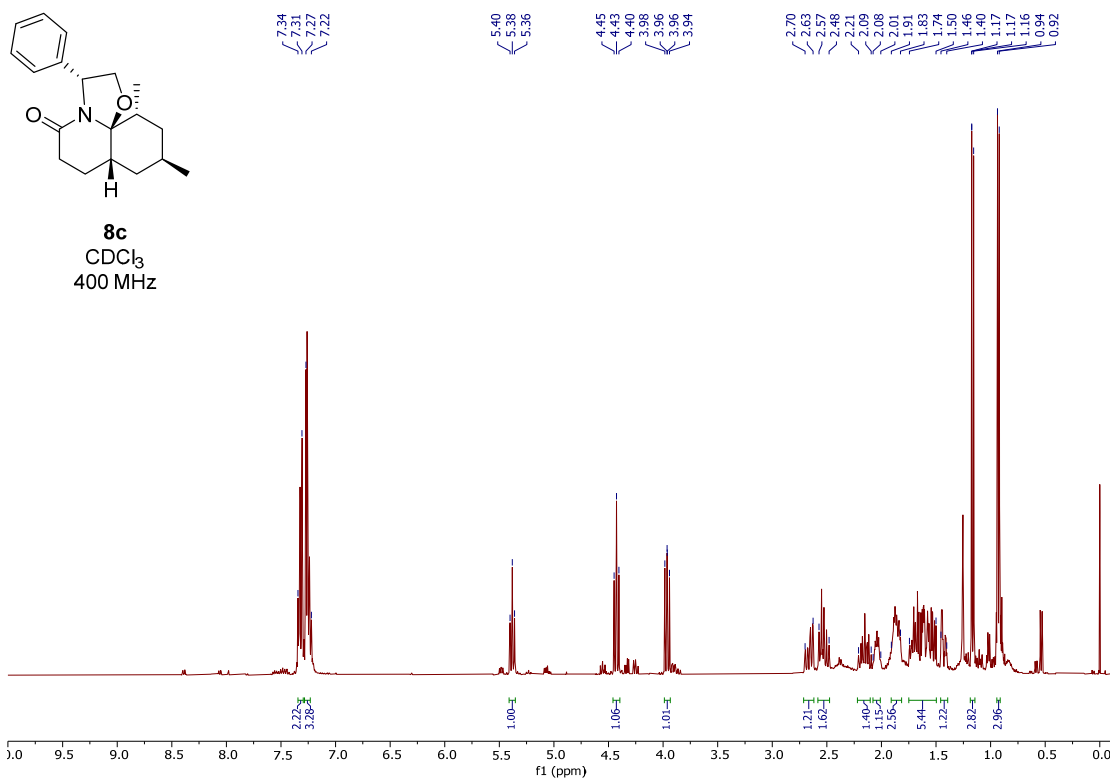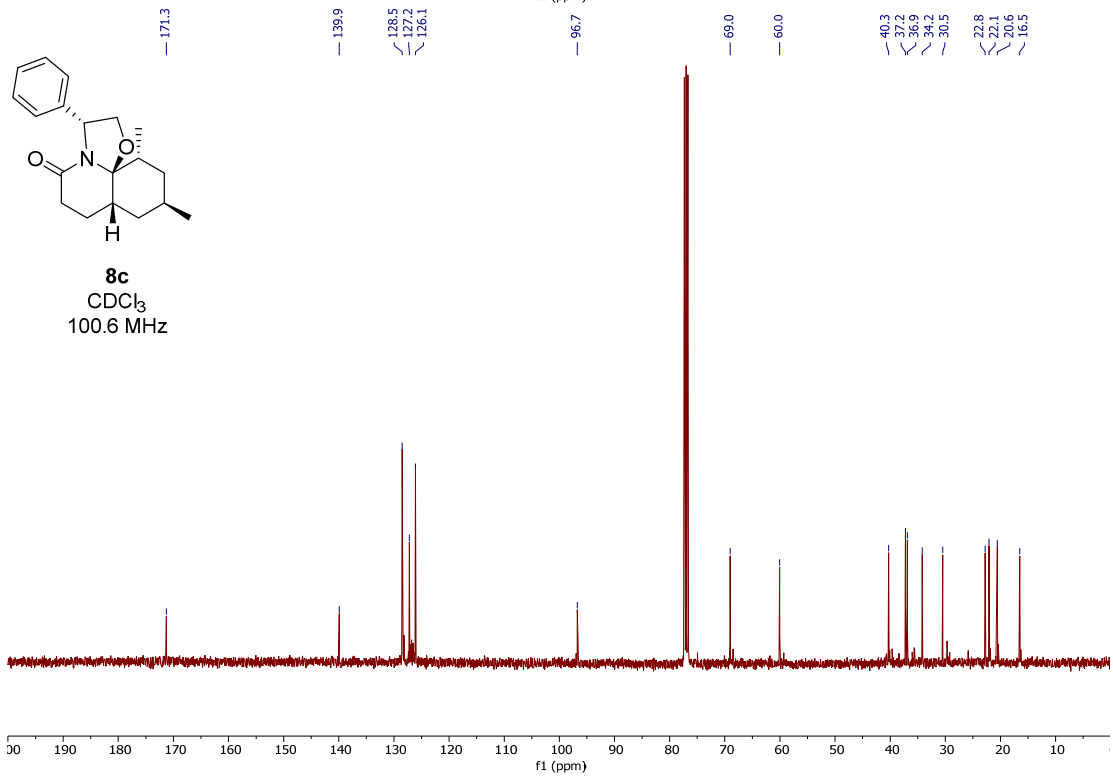



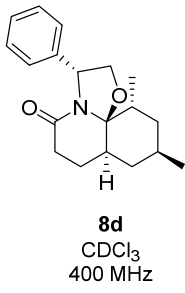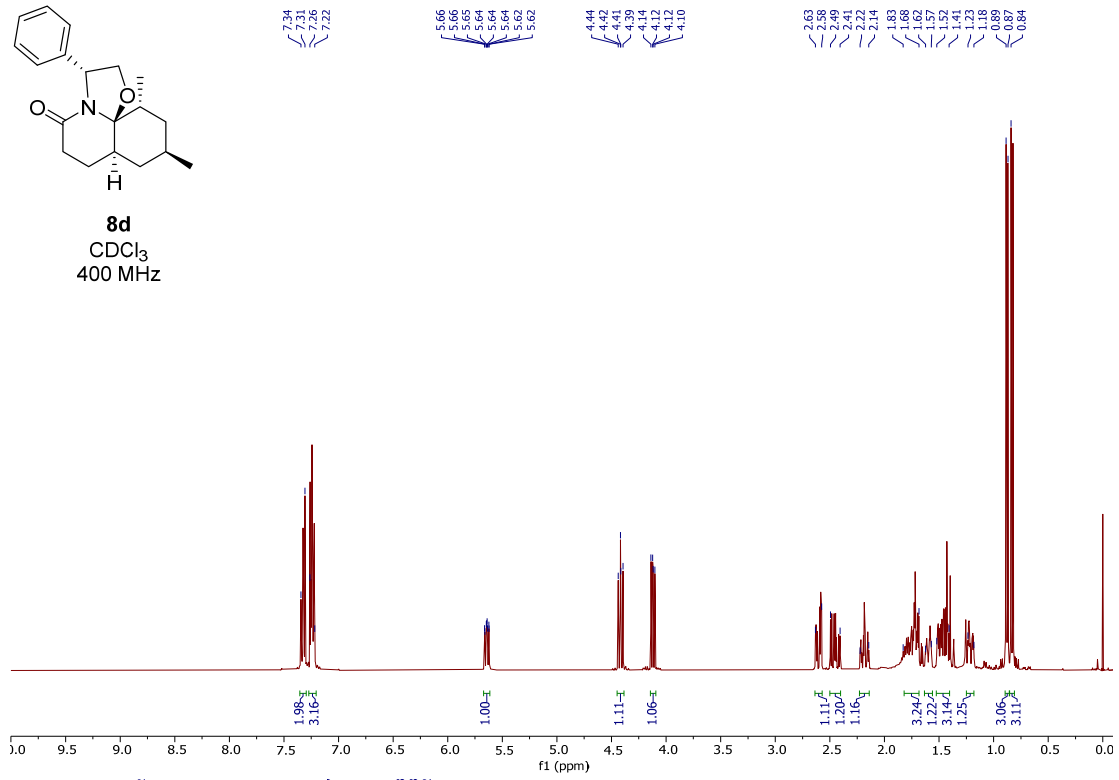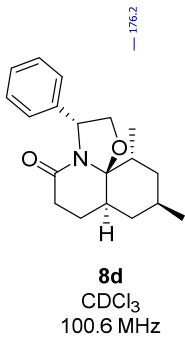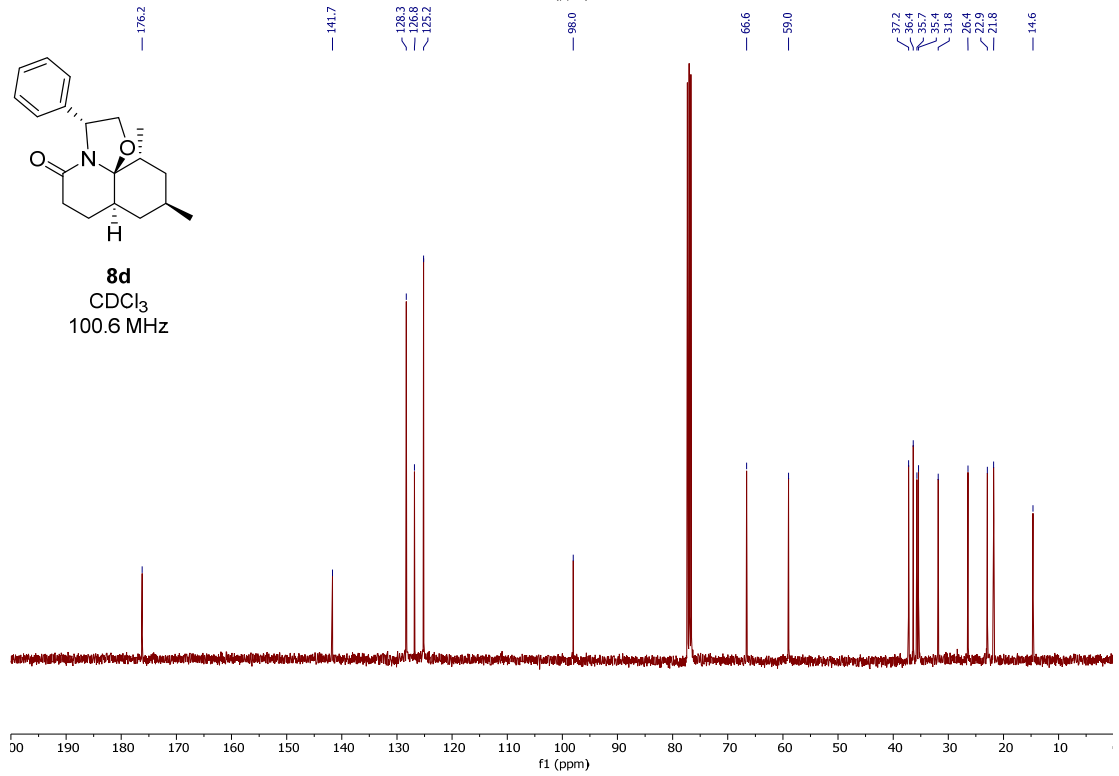

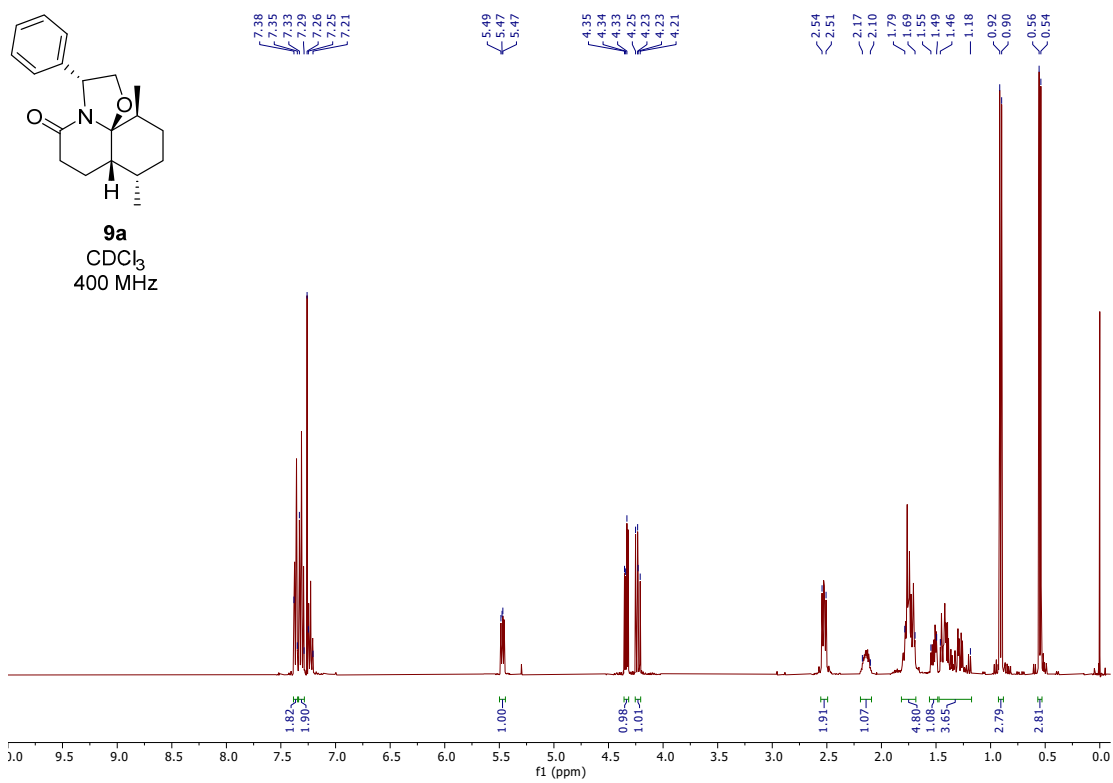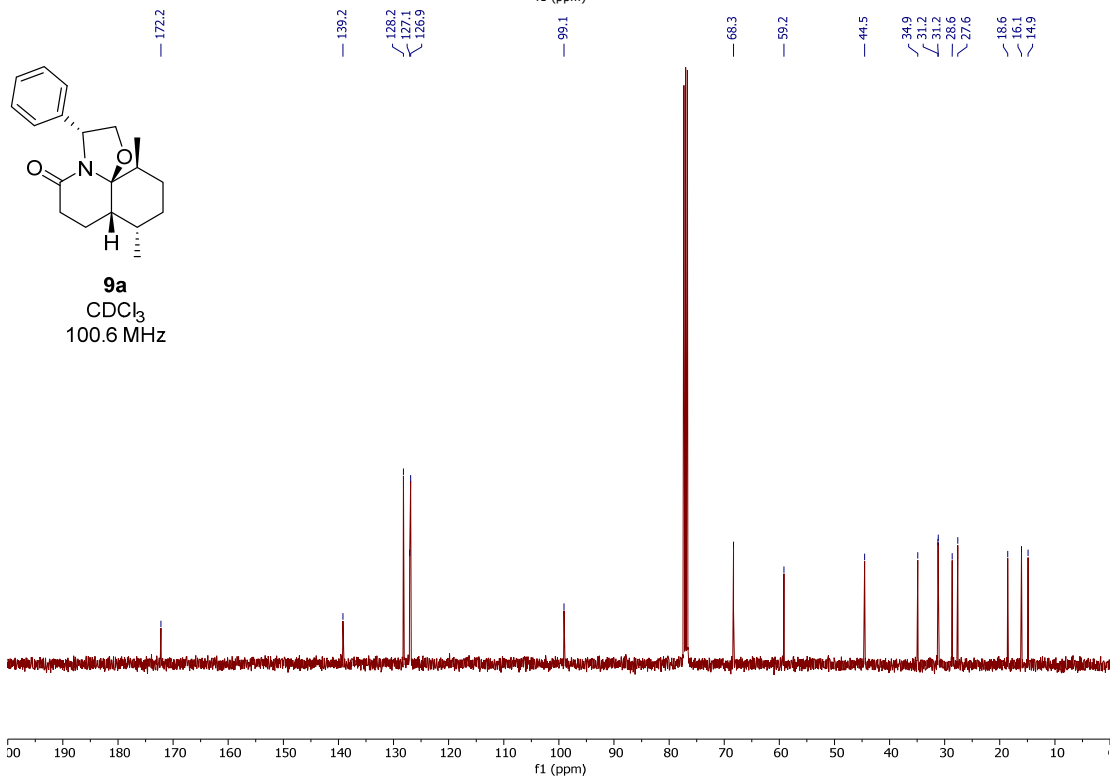

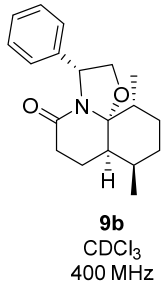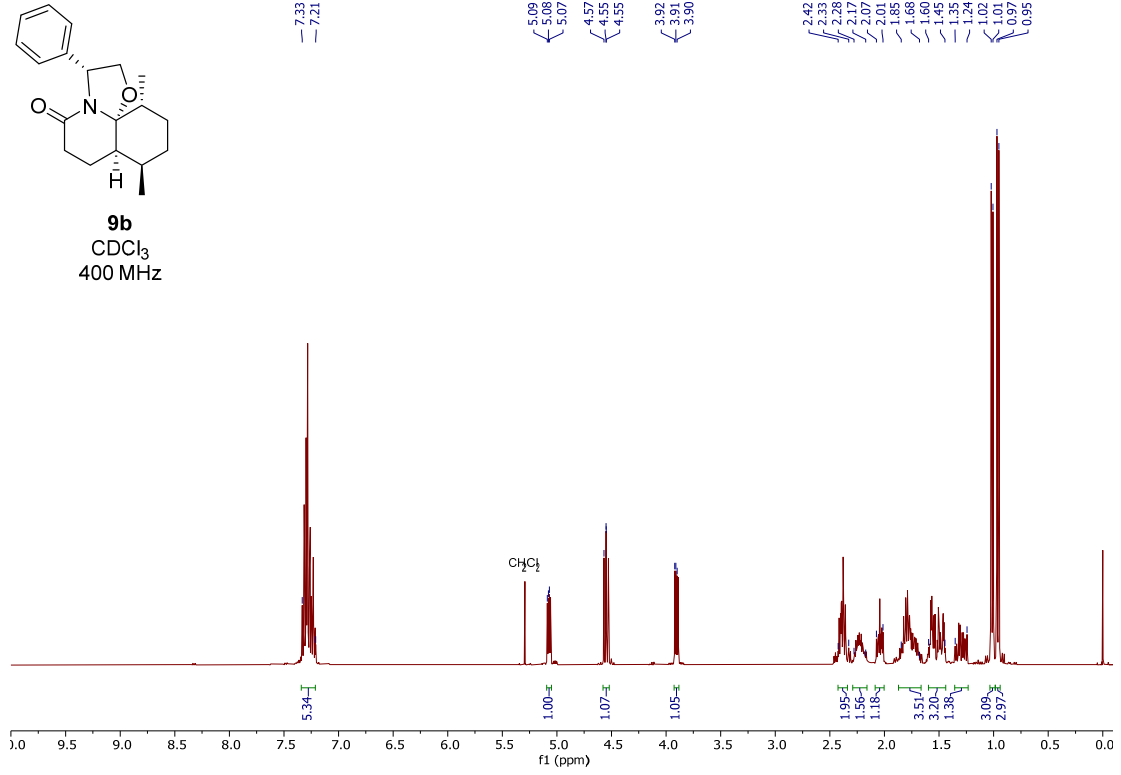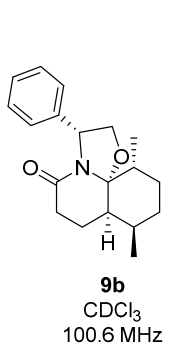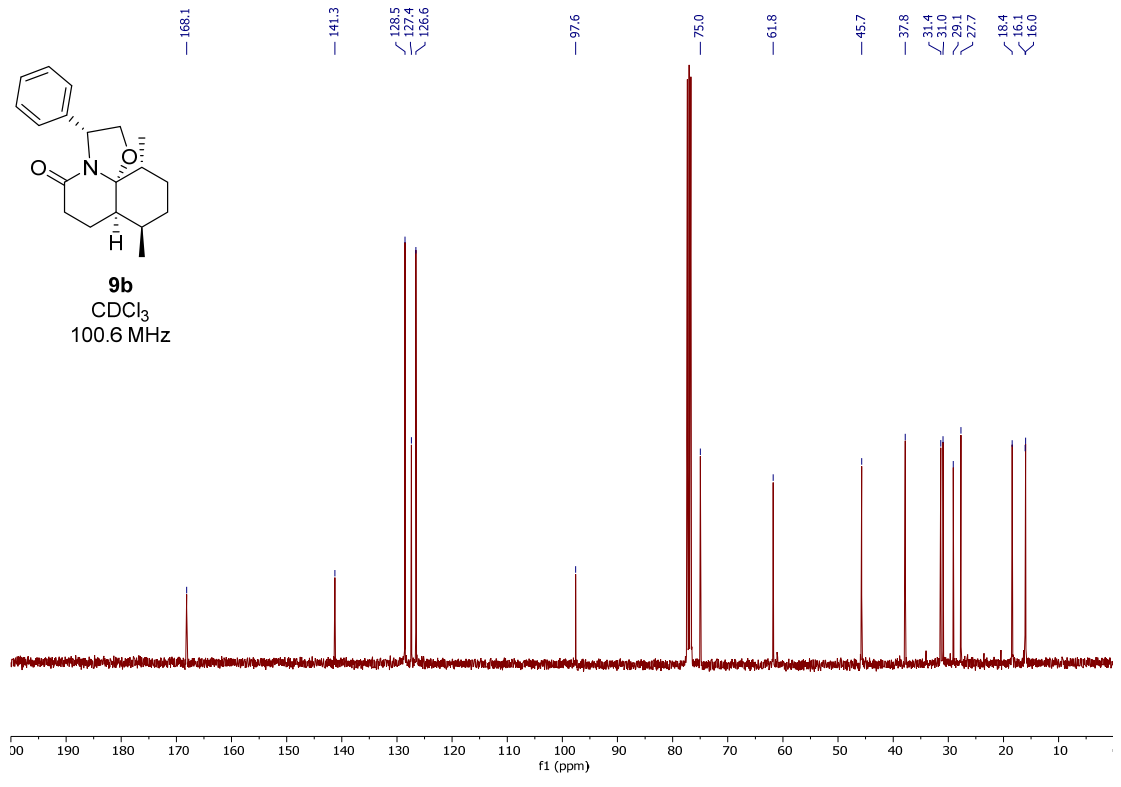

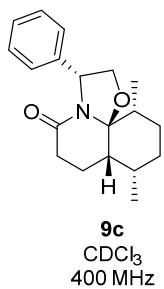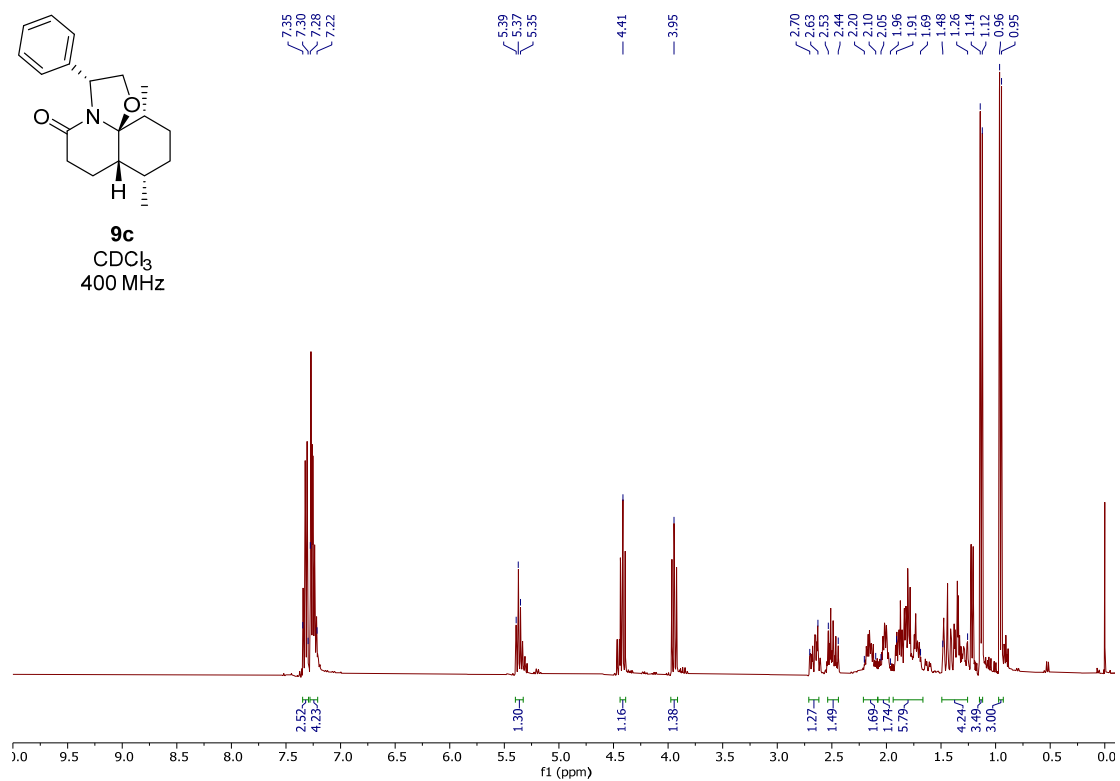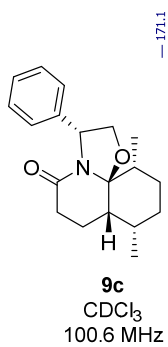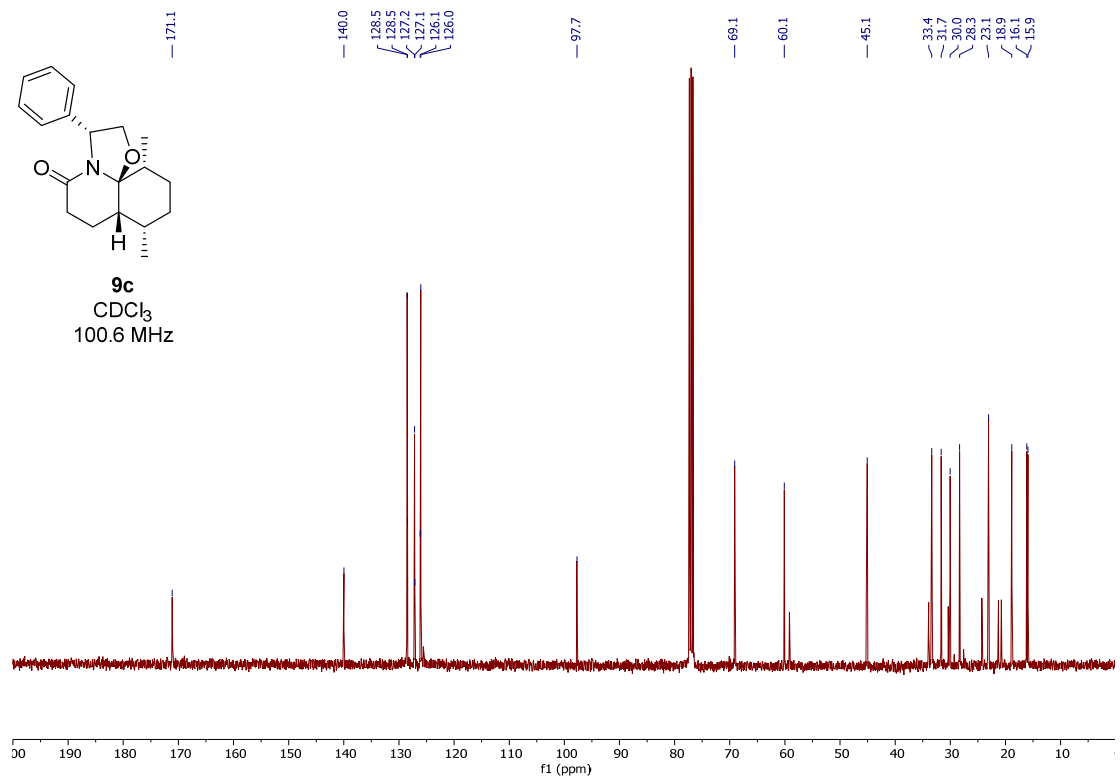

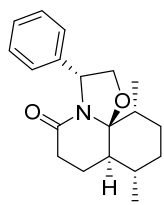

**9d**  
CDCl<sub>3</sub>  
400 MHz

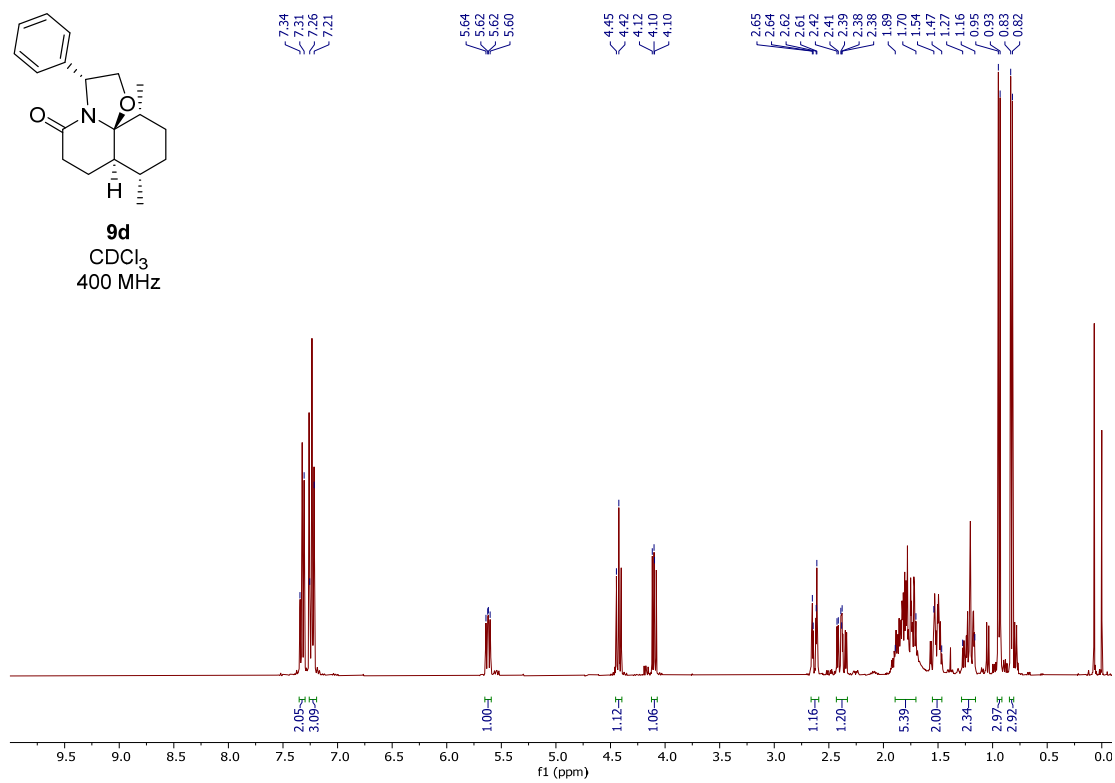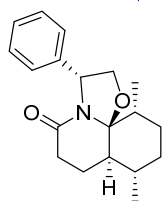

**9d**  
CDCl<sub>3</sub>  
100.6 MHz

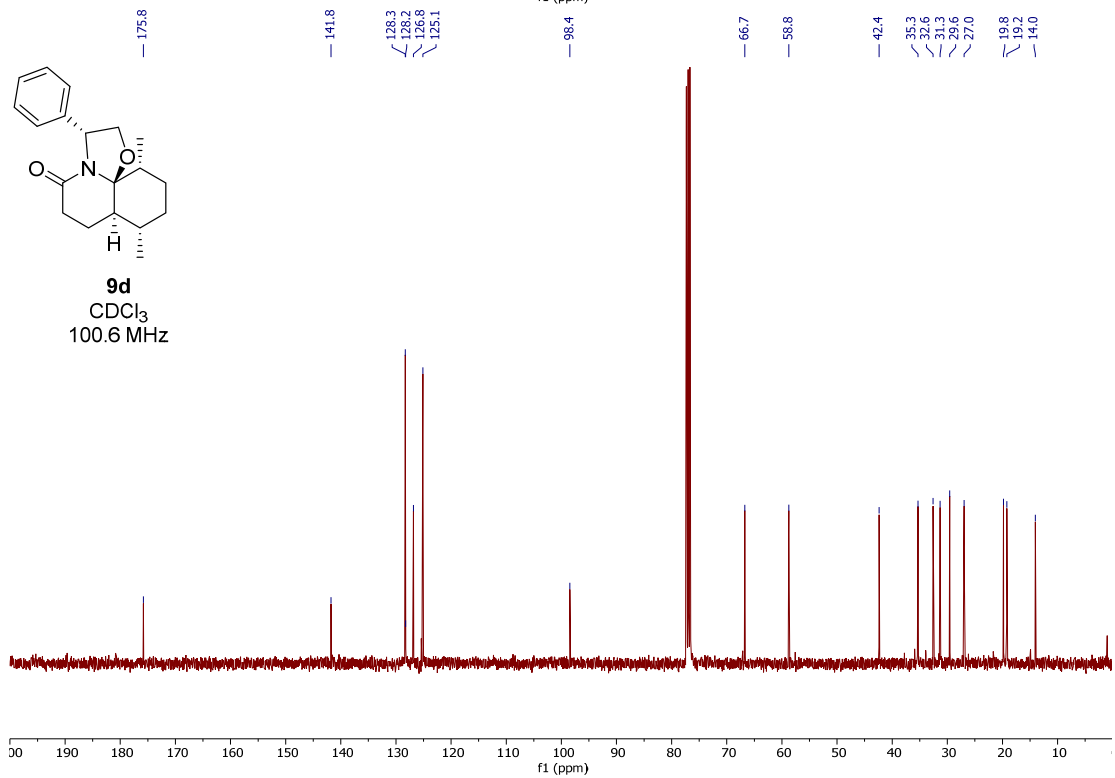

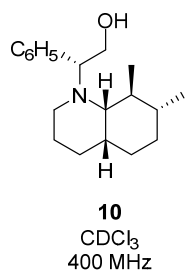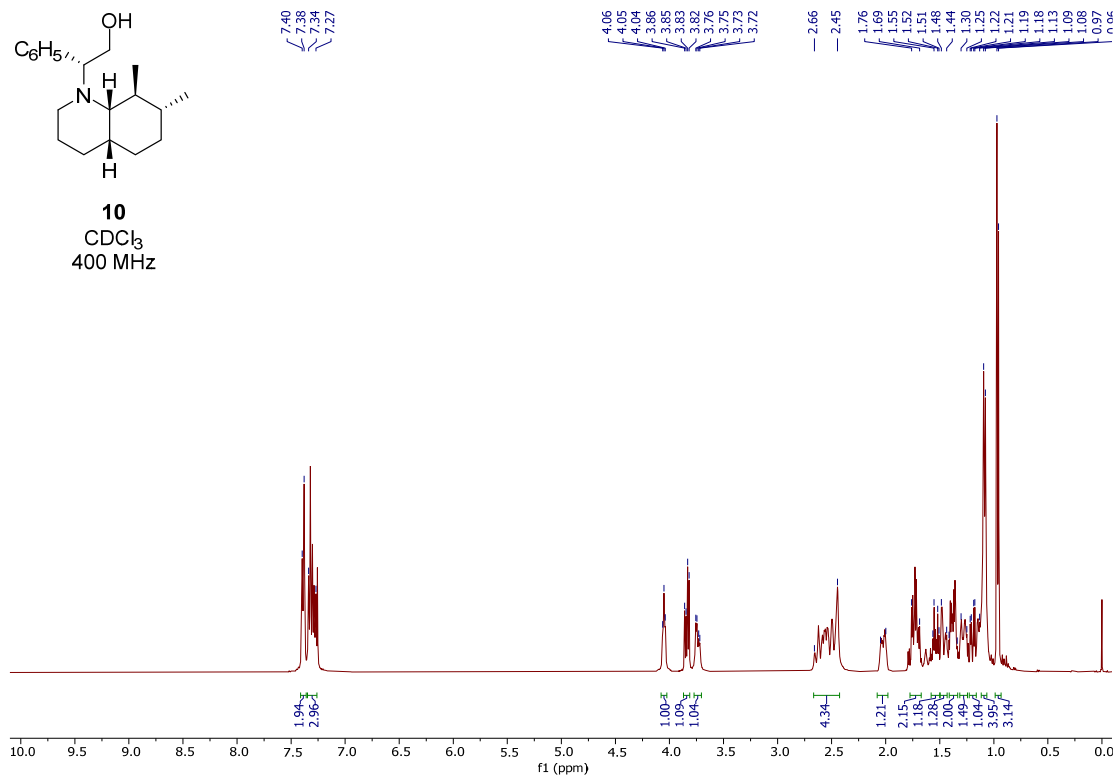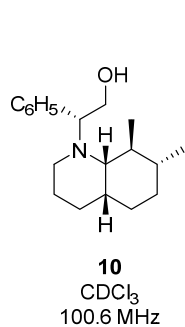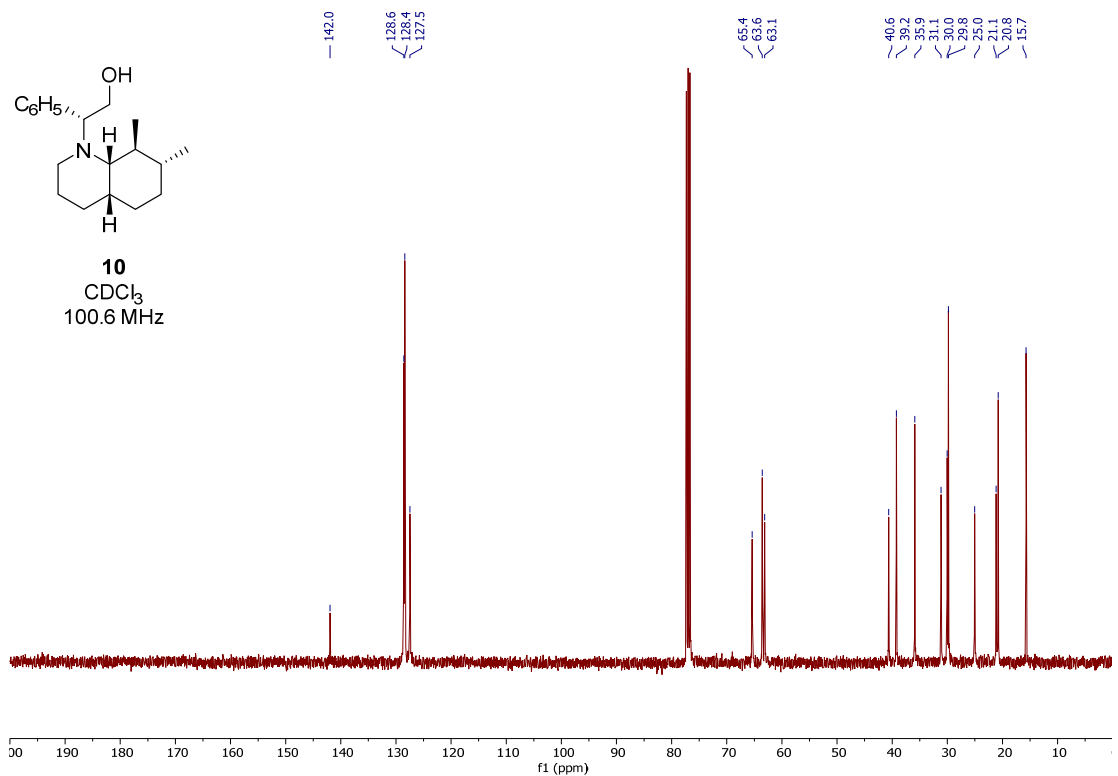

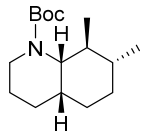

**11**  
CDCl<sub>3</sub>  
400 MHz

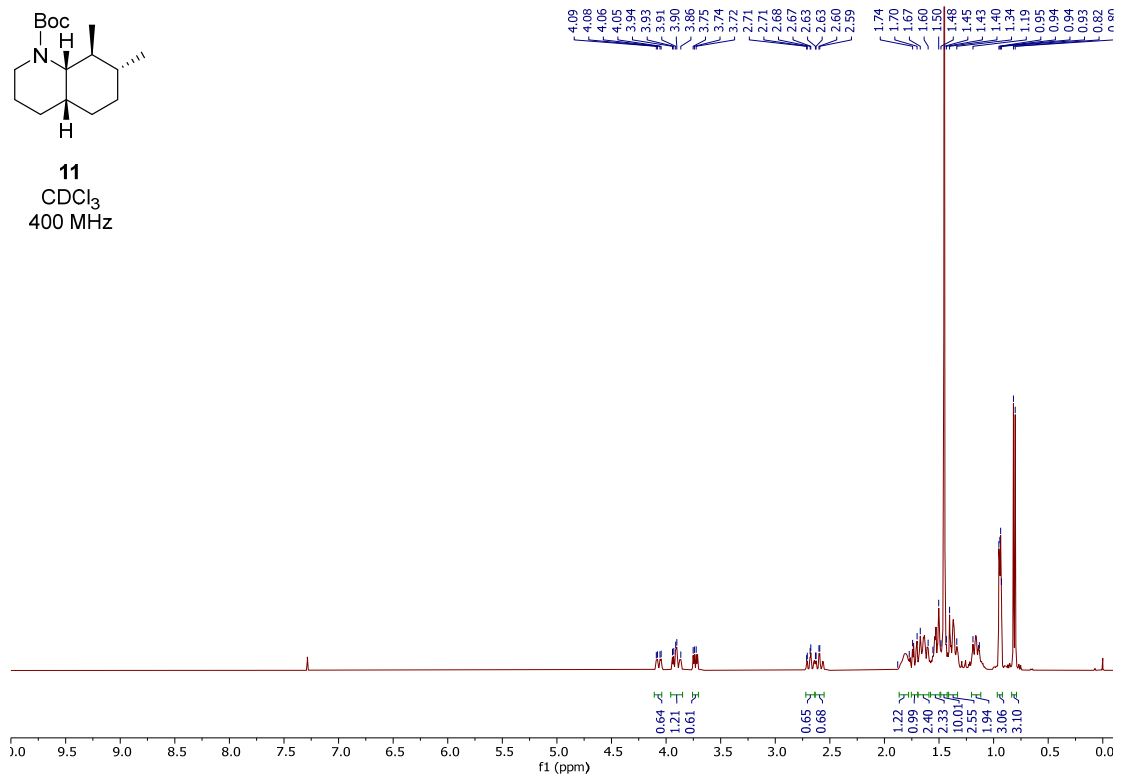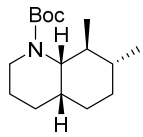

**11**  
CDCl<sub>3</sub>  
100.6 MHz

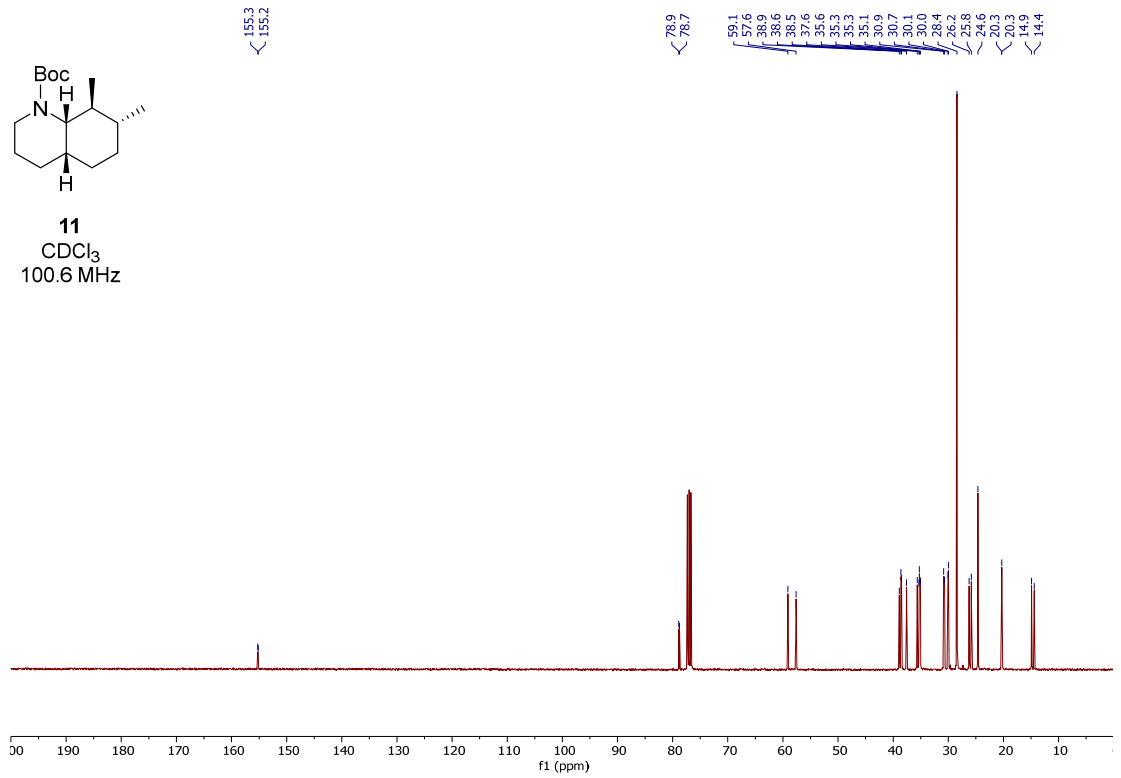

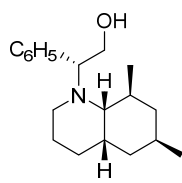

**12**  
CDCl<sub>3</sub>  
400 MHz

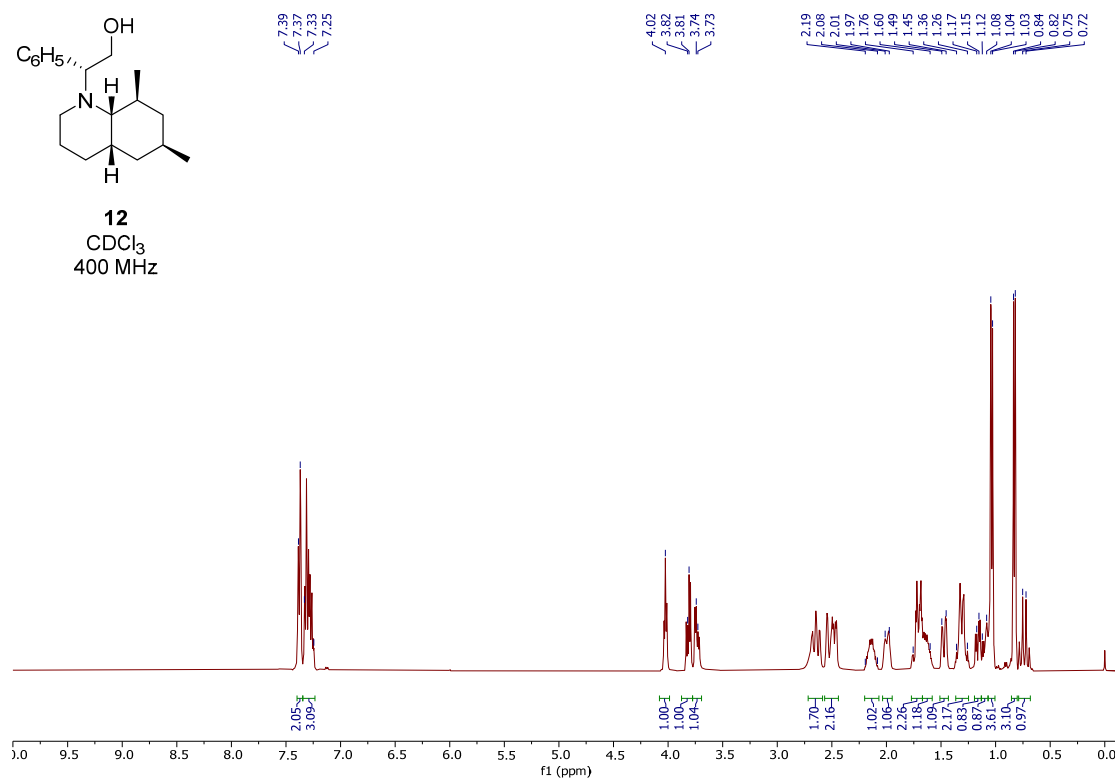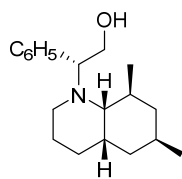

**12**  
CDCl<sub>3</sub>  
100.6 MHz

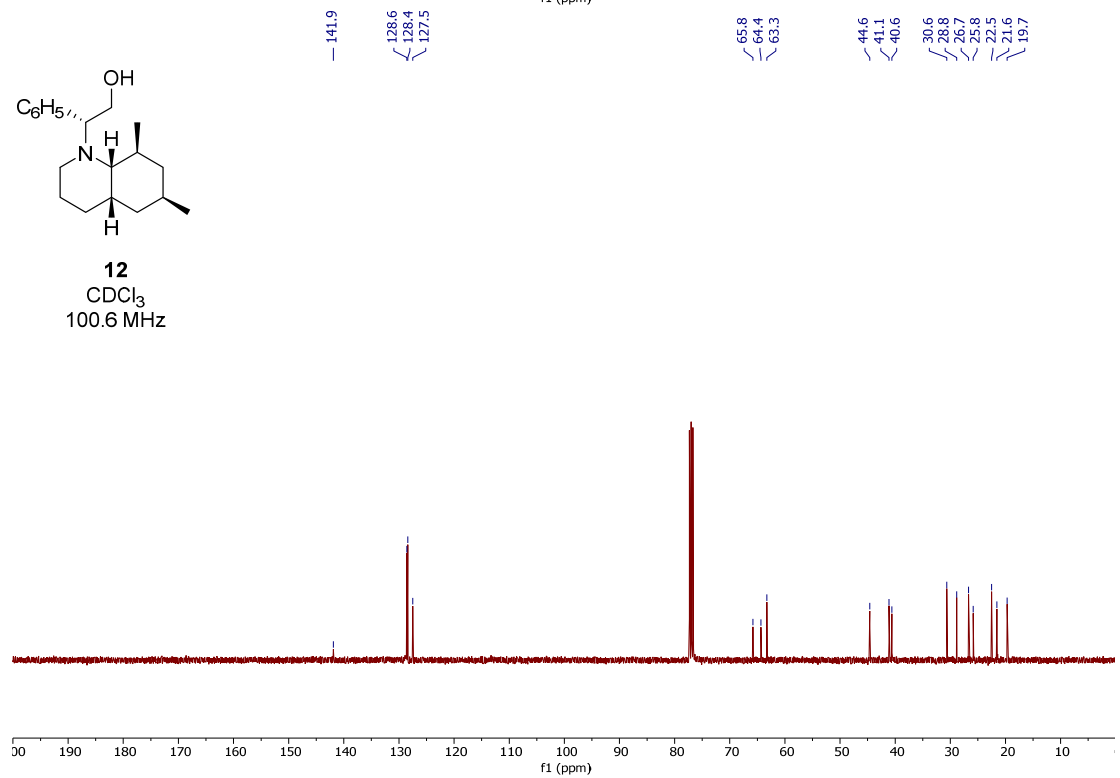



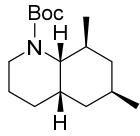

**13**  
CDCl<sub>3</sub>  
400 MHz

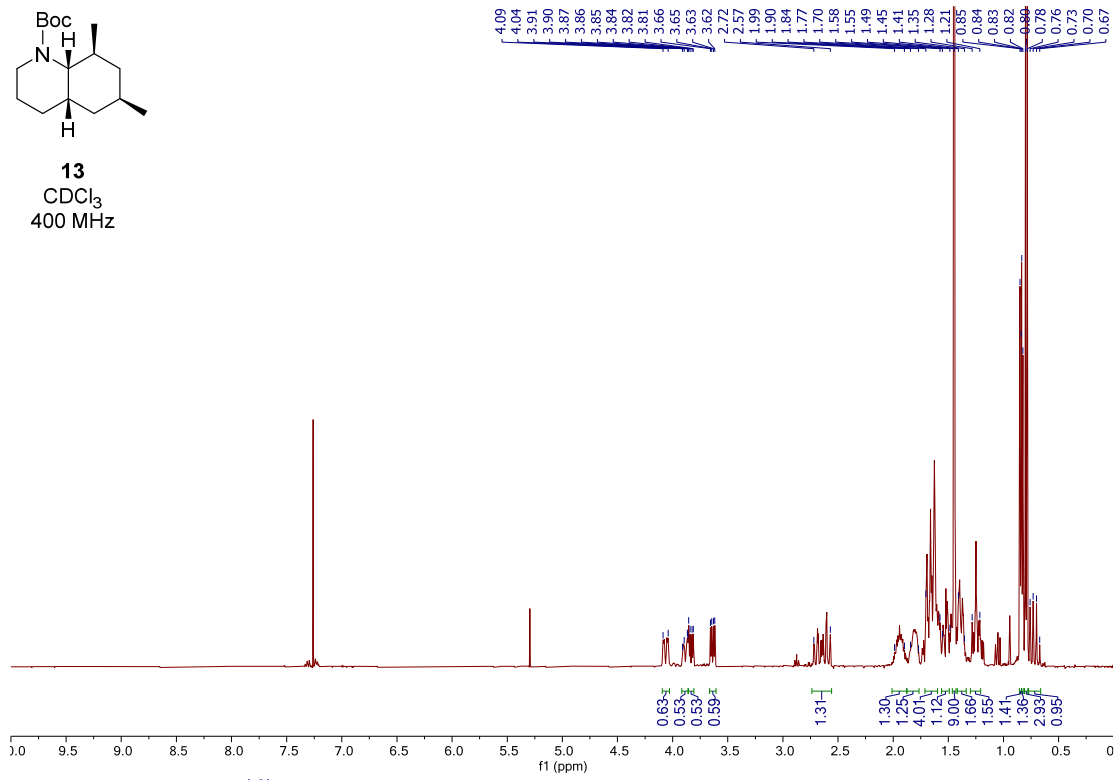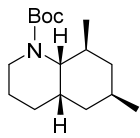

**13**  
CDCl<sub>3</sub>  
100.6 MHz

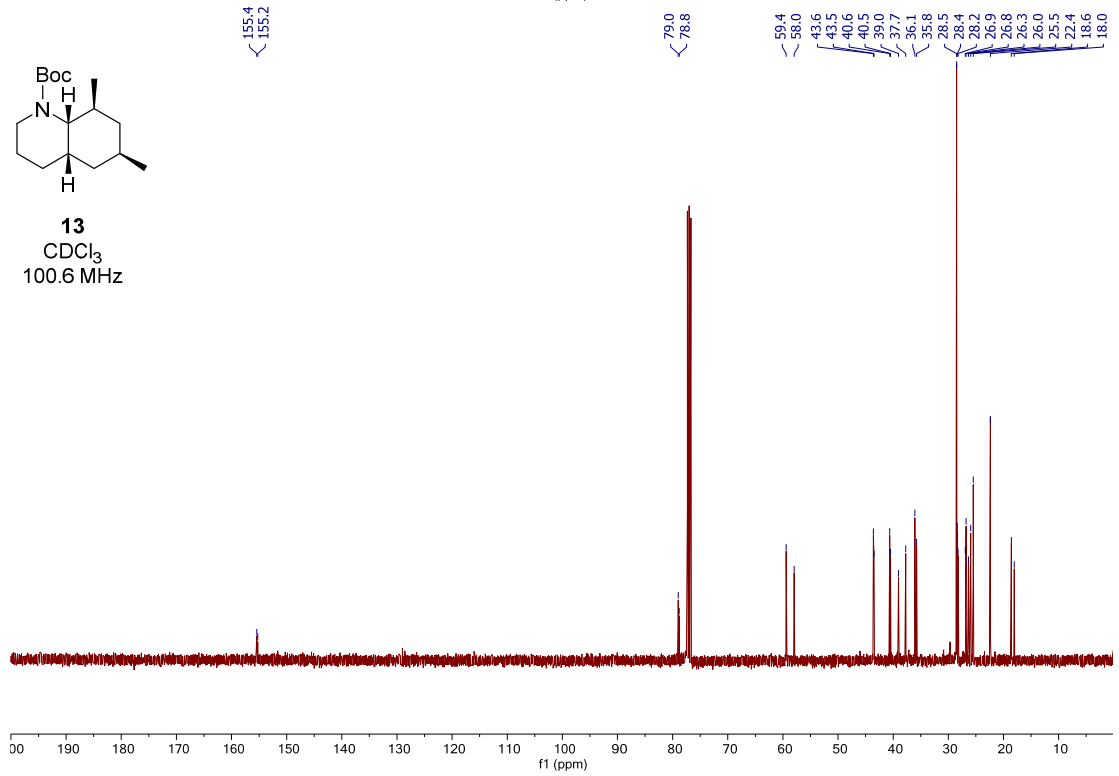

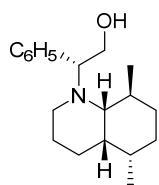

**14**  
CDCl<sub>3</sub>  
400 MHz

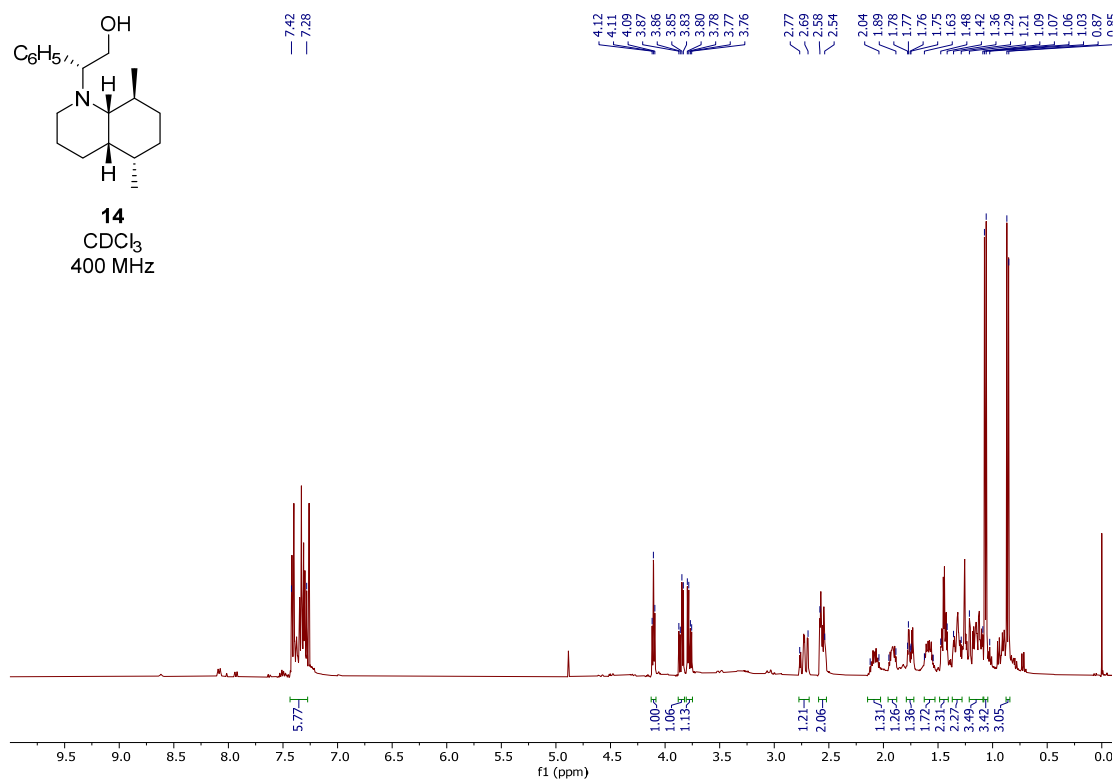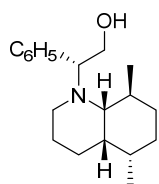

**14**  
CDCl<sub>3</sub>  
100.6 MHz

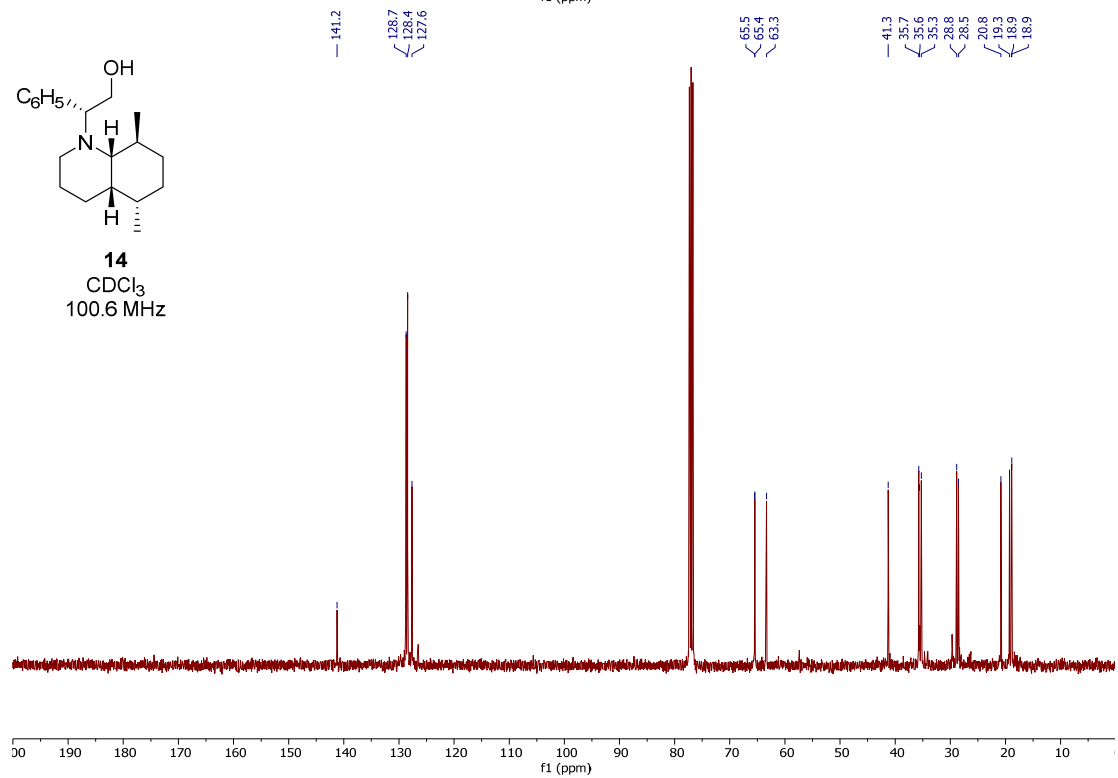

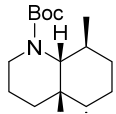

**15**  
CDCl<sub>3</sub>  
400 MHz

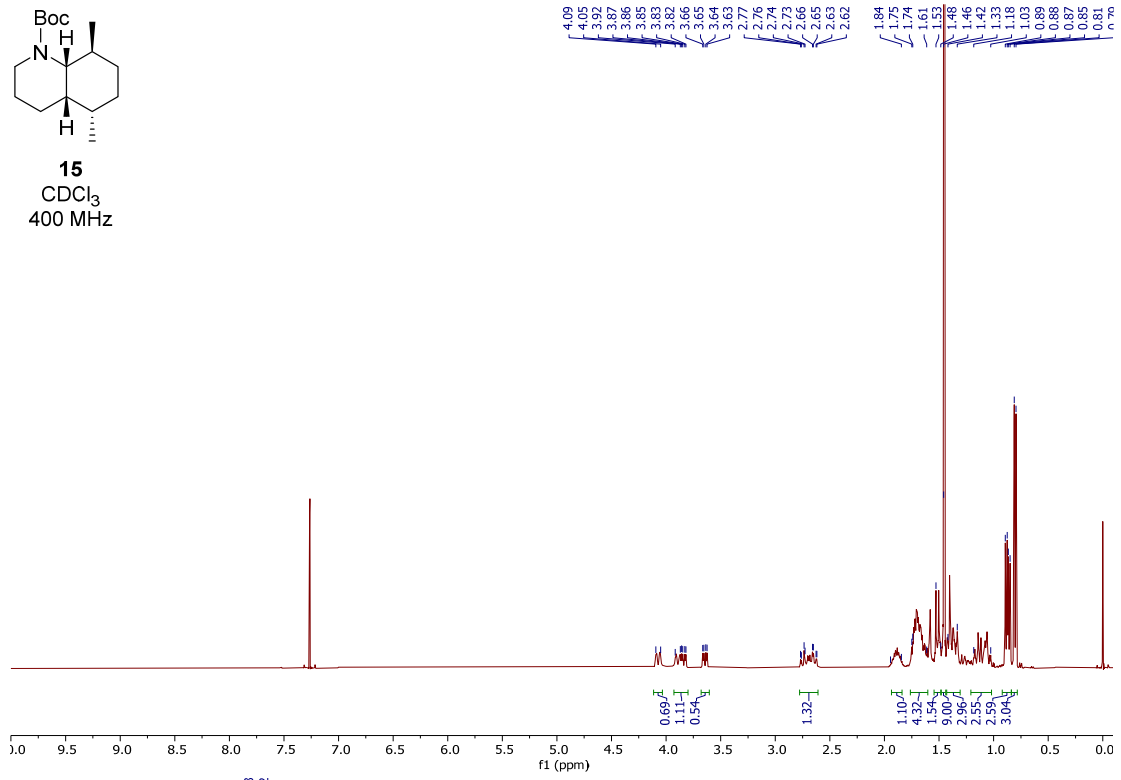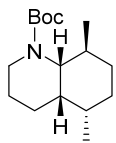

**15**  
CDCl<sub>3</sub>  
100.6 MHz

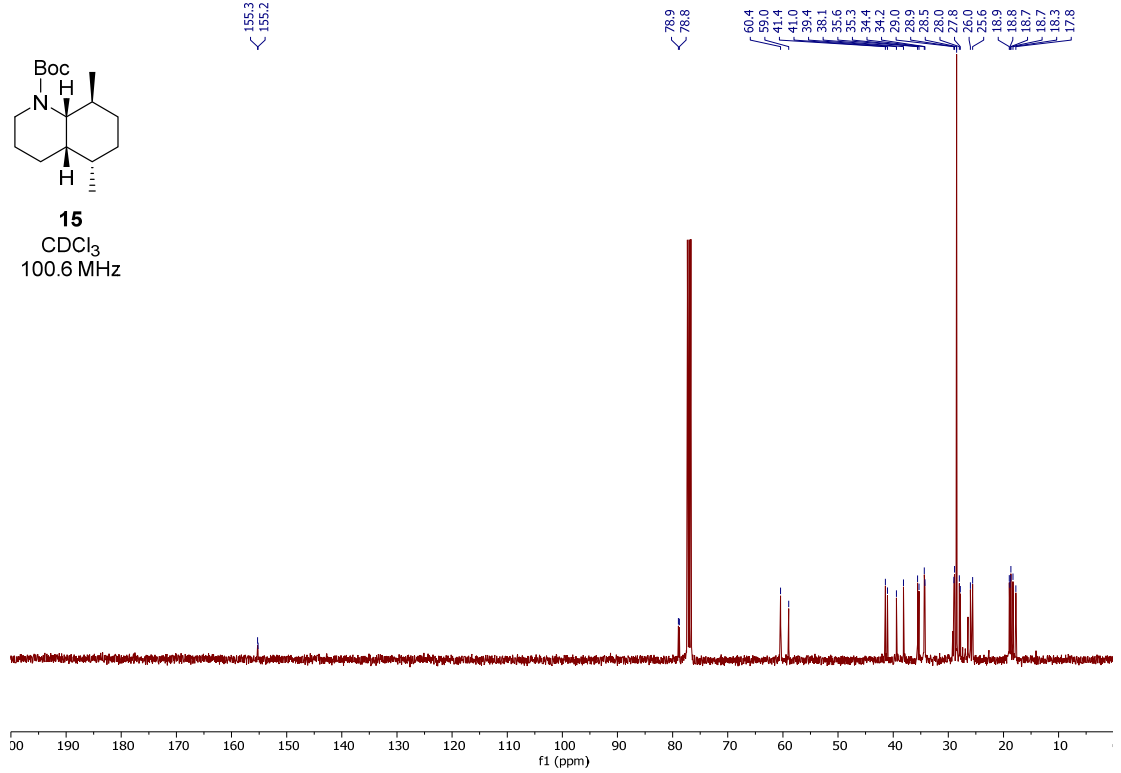

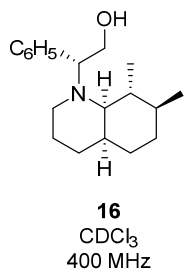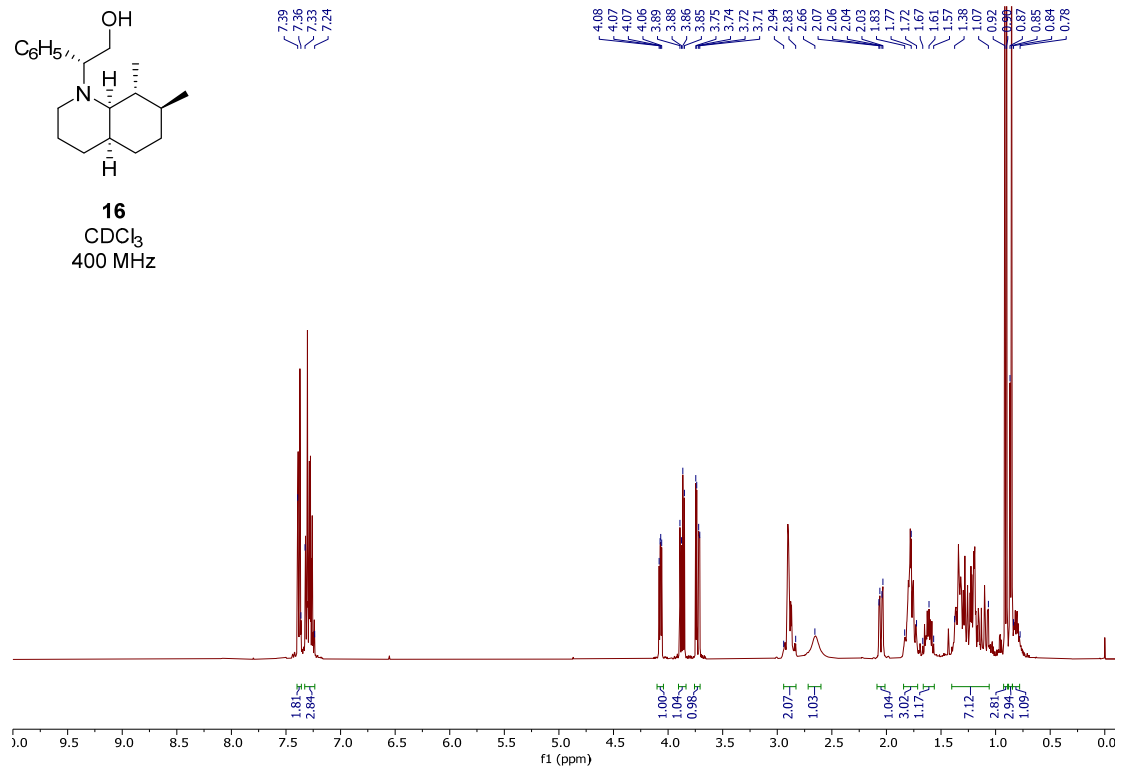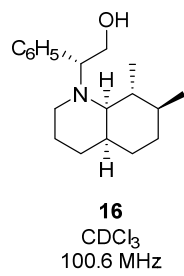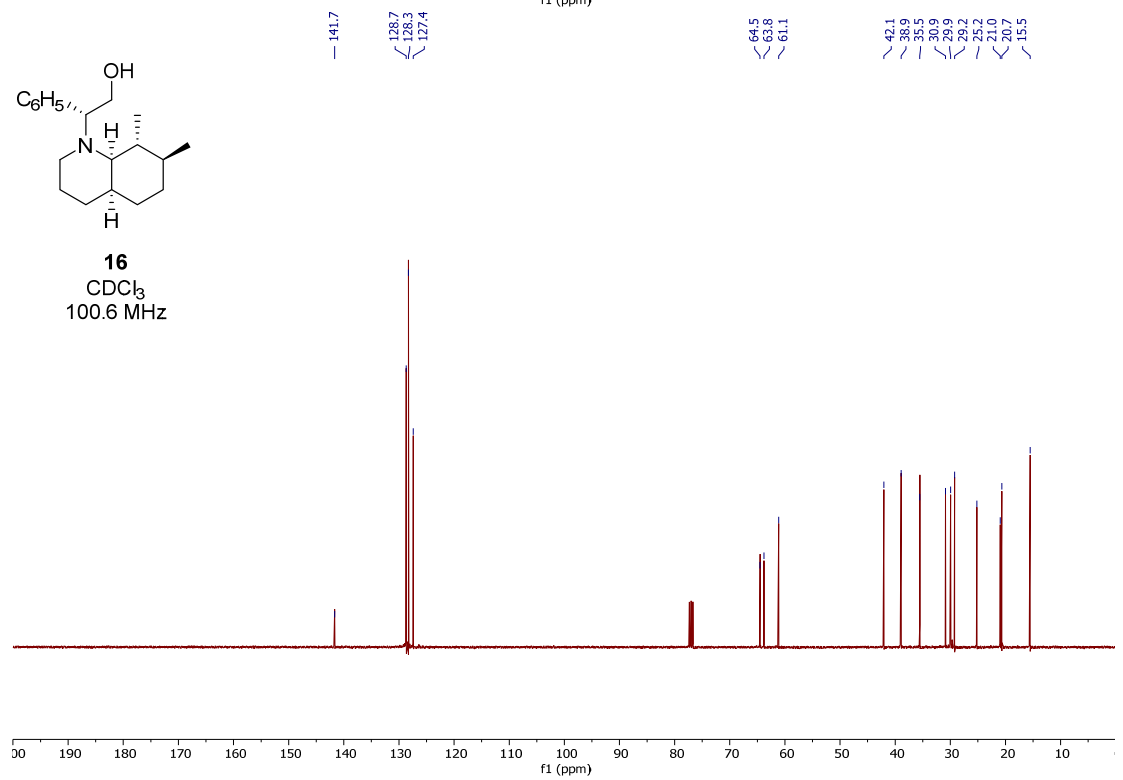

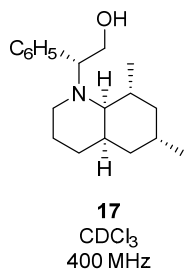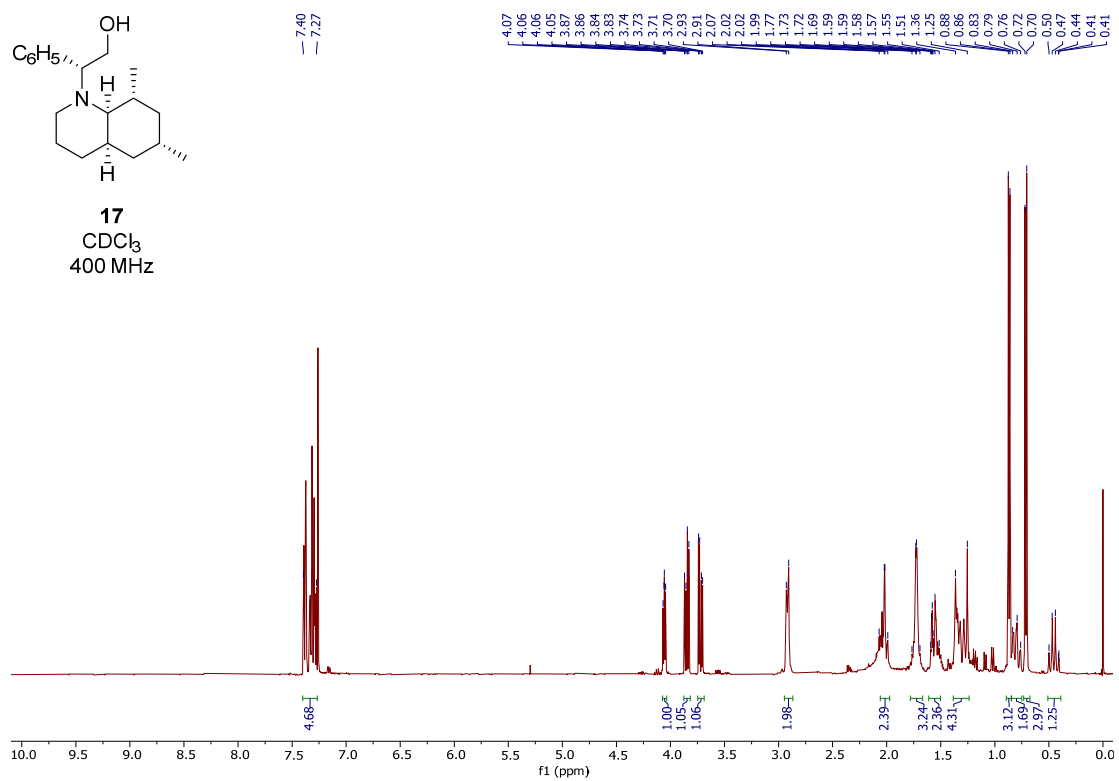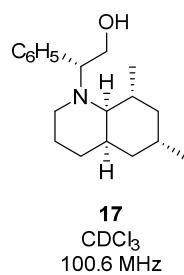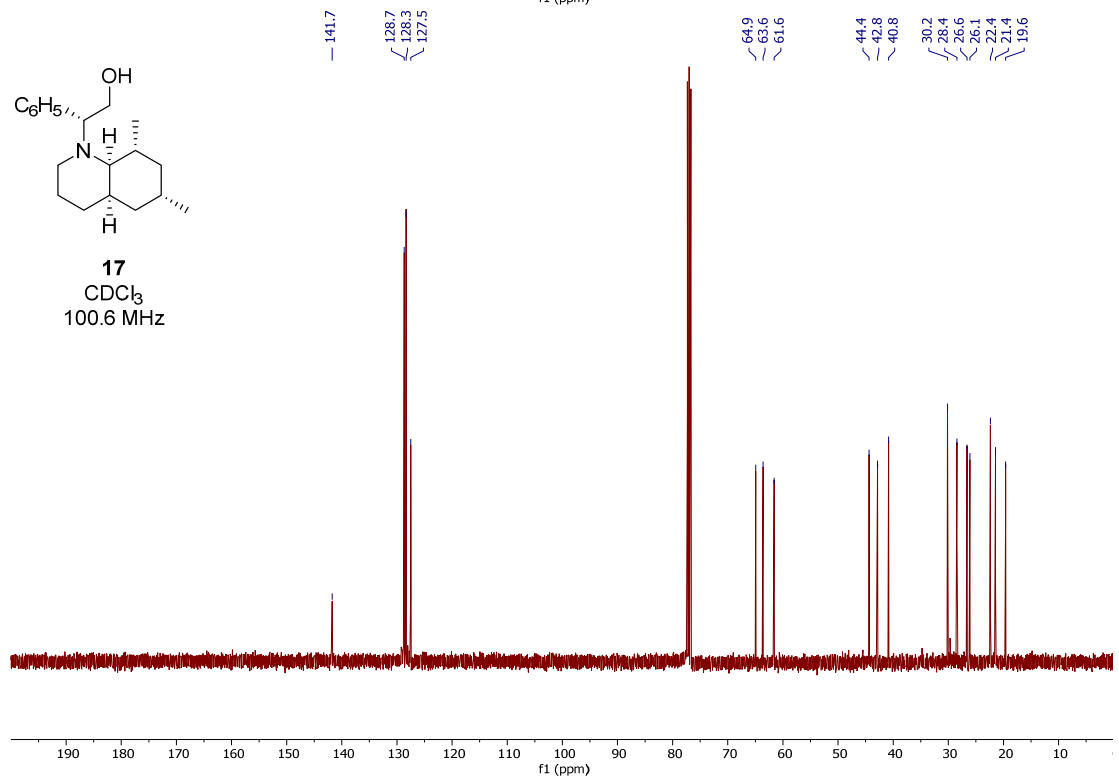

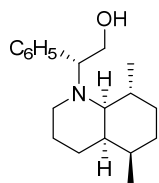

**18**  
CDCl<sub>3</sub>  
400 MHz

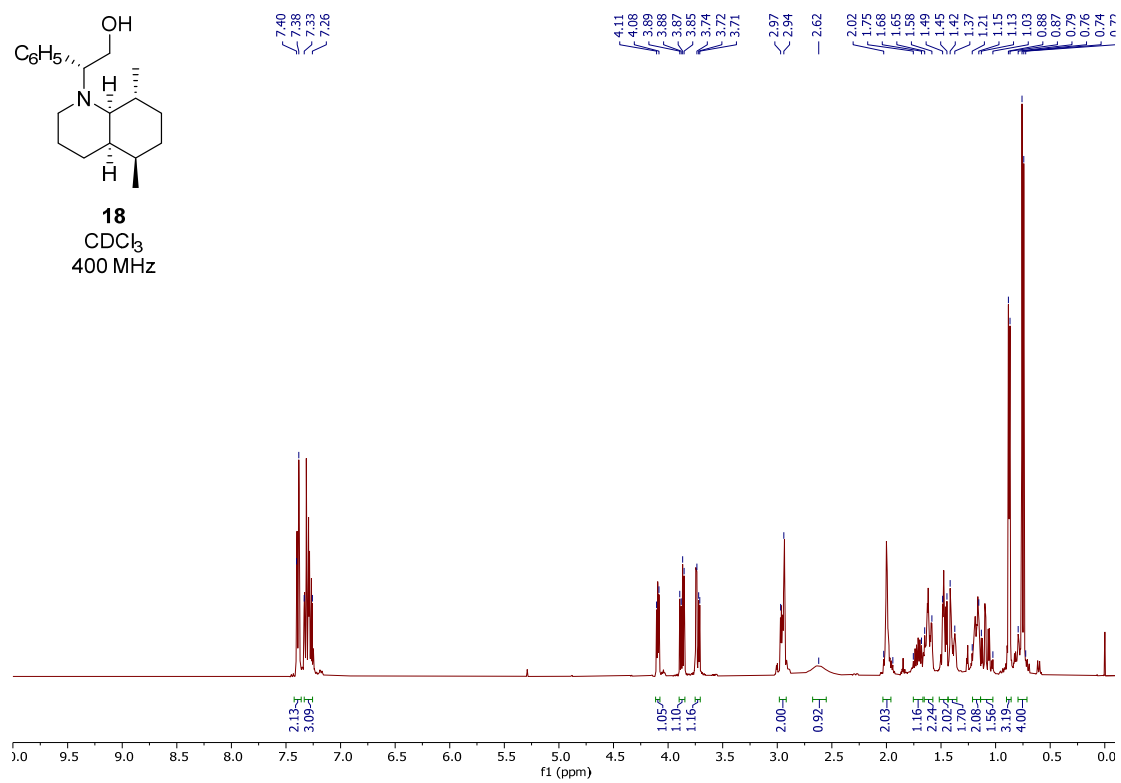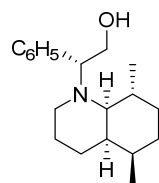

**18**  
CDCl<sub>3</sub>  
100.6 MHz

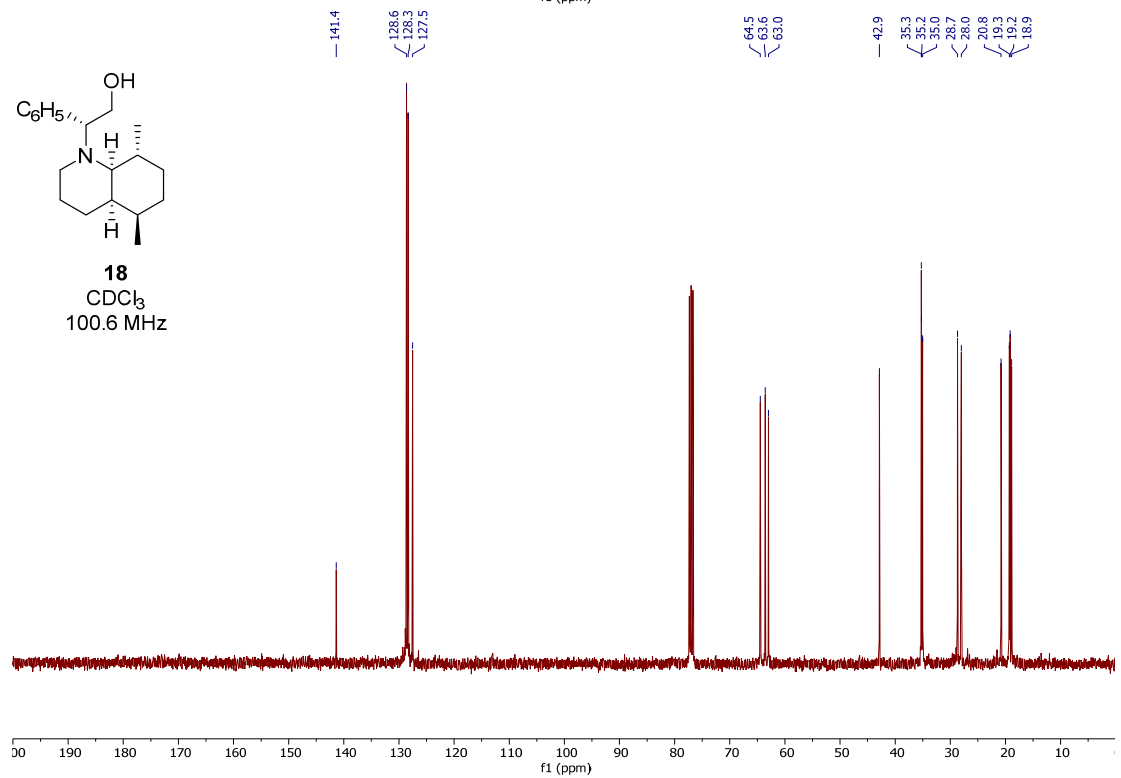

**IV) X- ray crystallographic data for compounds 7a,7b, 7d, 8a, 8b, 8d, 9a, 9b, 9c, and 9d**

Crystallographic data for compound **7a**:

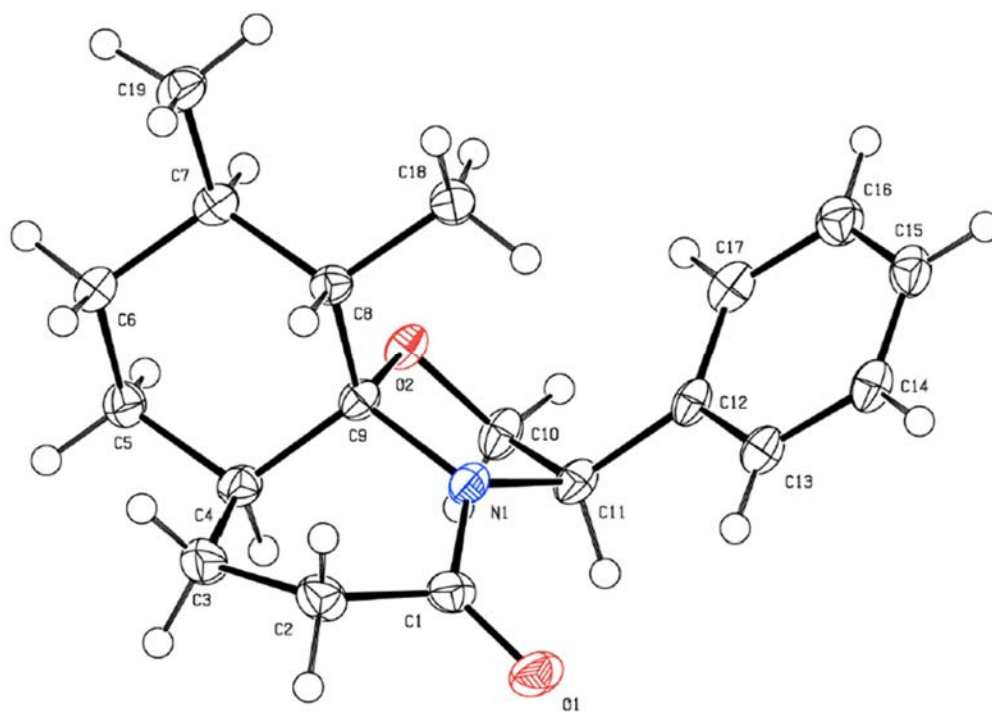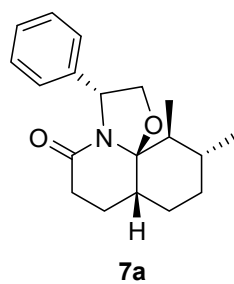



Table 1. Crystal data and structure refinement for **7a** (D59ZB41\_0m\_a).

|                                   |                                                  |                    |
|-----------------------------------|--------------------------------------------------|--------------------|
| Identification code               | D59ZB41_0m_a                                     |                    |
| Empirical formula                 | C <sub>19</sub> H <sub>25</sub> N O <sub>2</sub> |                    |
| Formula weight                    | 299.40                                           |                    |
| Temperature                       | 100(2) K                                         |                    |
| Wavelength                        | 1.54178 Å                                        |                    |
| Crystal system                    | Monoclinic                                       |                    |
| Space group                       | P 21                                             |                    |
| Unit cell dimensions              | a = 10.1771(3) Å                                 | α = 90°.           |
|                                   | b = 6.3005(2) Å                                  | β = 111.8700(10)°. |
|                                   | c = 13.2560(3) Å                                 | γ = 90°.           |
| Volume                            | 788.81(4) Å <sup>3</sup>                         |                    |
| Z                                 | 2                                                |                    |
| Density (calculated)              | 1.261 Mg/m <sup>3</sup>                          |                    |
| Absorption coefficient            | 0.635 mm <sup>-1</sup>                           |                    |
| F(000)                            | 324                                              |                    |
| Crystal size                      | 0.200 x 0.020 x 0.020 mm <sup>3</sup>            |                    |
| Theta range for data collection   | 3.593 to 71.948°.                                |                    |
| Index ranges                      | -12 ≤ h ≤ 12, -7 ≤ k ≤ 7, -16 ≤ l ≤ 16           |                    |
| Reflections collected             | 13380                                            |                    |
| Independent reflections           | 3061 [R(int) = 0.0366]                           |                    |
| Completeness to theta = 67.679°   | 99.5 %                                           |                    |
| Absorption correction             | Semi-empirical from equivalents                  |                    |
| Max. and min. transmission        | 0.7536 and 0.5838                                |                    |
| Refinement method                 | Full-matrix least-squares on F <sup>2</sup>      |                    |
| Data / restraints / parameters    | 3061 / 1 / 202                                   |                    |
| Goodness-of-fit on F <sup>2</sup> | 1.057                                            |                    |
| Final R indices [I > 2σ(I)]       | R1 = 0.0293, wR2 = 0.0699                        |                    |
| R indices (all data)              | R1 = 0.0317, wR2 = 0.0723                        |                    |
| Absolute structure parameter      | 0.0(3)                                           |                    |
| Extinction coefficient            | n/a                                              |                    |
| Largest diff. peak and hole       | 0.156 and -0.181 e.Å <sup>-3</sup>               |                    |

Table 2. Atomic coordinates ( $\times 10^4$ ) and equivalent isotropic displacement parameters ( $\text{\AA}^2 \times 10^3$ ) for D59ZB41\_0m\_a.  $U(\text{eq})$  is defined as one third of the trace of the orthogonalized  $U^{ij}$  tensor.

|       | x       | y       | z       | $U(\text{eq})$ |
|-------|---------|---------|---------|----------------|
| O(1)  | 4486(2) | 5241(3) | -109(1) | 29(1)          |
| O(2)  | 4738(1) | 2503(2) | 3066(1) | 20(1)          |
| N(1)  | 4754(2) | 4527(2) | 1638(1) | 19(1)          |
| C(1)  | 5264(2) | 4997(3) | 846(2)  | 23(1)          |
| C(2)  | 6844(2) | 5300(4) | 1248(2) | 27(1)          |
| C(3)  | 7703(2) | 3615(4) | 2074(2) | 28(1)          |
| C(4)  | 6851(2) | 2371(3) | 2614(2) | 21(1)          |
| C(5)  | 7802(2) | 1462(3) | 3719(2) | 22(1)          |
| C(6)  | 8375(2) | 3187(3) | 4582(2) | 23(1)          |
| C(7)  | 7194(2) | 4553(3) | 4691(2) | 21(1)          |
| C(8)  | 6255(2) | 5527(3) | 3586(1) | 18(1)          |
| C(9)  | 5681(2) | 3753(3) | 2736(1) | 18(1)          |
| C(10) | 3615(2) | 1784(3) | 2108(2) | 23(1)          |
| C(11) | 3307(2) | 3663(3) | 1331(2) | 22(1)          |
| C(12) | 2254(2) | 5318(3) | 1393(1) | 20(1)          |
| C(13) | 1941(2) | 6984(3) | 644(2)  | 22(1)          |
| C(14) | 967(2)  | 8539(3) | 622(2)  | 24(1)          |
| C(15) | 306(2)  | 8482(3) | 1365(2) | 25(1)          |
| C(16) | 627(2)  | 6850(4) | 2128(2) | 27(1)          |
| C(17) | 1589(2) | 5274(4) | 2135(2) | 25(1)          |
| C(18) | 5065(2) | 6898(3) | 3675(2) | 22(1)          |
| C(19) | 7816(2) | 6254(4) | 5561(2) | 28(1)          |

Table 3. Bond lengths [Å] and angles [°] for D59ZB41\_0m\_a.

---

|              |          |
|--------------|----------|
| O(1)-C(1)    | 1.227(2) |
| O(2)-C(10)   | 1.430(2) |
| O(2)-C(9)    | 1.430(2) |
| N(1)-C(1)    | 1.366(2) |
| N(1)-C(11)   | 1.478(2) |
| N(1)-C(9)    | 1.491(2) |
| C(1)-C(2)    | 1.506(3) |
| C(2)-C(3)    | 1.542(3) |
| C(2)-H(2A)   | 0.9900   |
| C(2)-H(2AB)  | 0.9900   |
| C(3)-C(4)    | 1.530(3) |
| C(3)-H(3A)   | 0.9900   |
| C(3)-H(3AB)  | 0.9900   |
| C(4)-C(9)    | 1.532(2) |
| C(4)-C(5)    | 1.534(3) |
| C(4)-H(4)    | 1.0000   |
| C(5)-C(6)    | 1.528(3) |
| C(5)-H(5A)   | 0.9900   |
| C(5)-H(5AB)  | 0.9900   |
| C(6)-C(7)    | 1.528(3) |
| C(6)-H(6A)   | 0.9900   |
| C(6)-H(6AB)  | 0.9900   |
| C(7)-C(19)   | 1.528(3) |
| C(7)-C(8)    | 1.547(2) |
| C(7)-H(7)    | 1.0000   |
| C(8)-C(18)   | 1.527(2) |
| C(8)-C(9)    | 1.540(2) |
| C(8)-H(8)    | 1.0000   |
| C(10)-C(11)  | 1.523(3) |
| C(10)-H(10A) | 0.9900   |
| C(10)-H(10B) | 0.9900   |
| C(11)-C(12)  | 1.519(3) |
| C(11)-H(11)  | 1.0000   |
| C(12)-C(17)  | 1.387(3) |

|                   |            |
|-------------------|------------|
| C(12)-C(13)       | 1.397(3)   |
| C(13)-C(14)       | 1.386(3)   |
| C(13)-H(13)       | 0.9500     |
| C(14)-C(15)       | 1.385(3)   |
| C(14)-H(14)       | 0.9500     |
| C(15)-C(16)       | 1.393(3)   |
| C(15)-H(15)       | 0.9500     |
| C(16)-C(17)       | 1.392(3)   |
| C(16)-H(16)       | 0.9500     |
| C(17)-H(17)       | 0.9500     |
| C(18)-H(18A)      | 0.9800     |
| C(18)-H(18B)      | 0.9800     |
| C(18)-H(18C)      | 0.9800     |
| C(19)-H(19A)      | 0.9800     |
| C(19)-H(19B)      | 0.9800     |
| C(19)-H(19C)      | 0.9800     |
|                   |            |
| C(10)-O(2)-C(9)   | 107.89(13) |
| C(1)-N(1)-C(11)   | 119.51(15) |
| C(1)-N(1)-C(9)    | 122.58(15) |
| C(11)-N(1)-C(9)   | 110.58(14) |
| O(1)-C(1)-N(1)    | 122.47(18) |
| O(1)-C(1)-C(2)    | 122.83(17) |
| N(1)-C(1)-C(2)    | 114.63(16) |
| C(1)-C(2)-C(3)    | 114.34(18) |
| C(1)-C(2)-H(2A)   | 108.7      |
| C(3)-C(2)-H(2A)   | 108.7      |
| C(1)-C(2)-H(2AB)  | 108.7      |
| C(3)-C(2)-H(2AB)  | 108.7      |
| H(2A)-C(2)-H(2AB) | 107.6      |
| C(4)-C(3)-C(2)    | 114.49(16) |
| C(4)-C(3)-H(3A)   | 108.6      |
| C(2)-C(3)-H(3A)   | 108.6      |
| C(4)-C(3)-H(3AB)  | 108.6      |
| C(2)-C(3)-H(3AB)  | 108.6      |
| H(3A)-C(3)-H(3AB) | 107.6      |

|                   |            |
|-------------------|------------|
| C(3)-C(4)-C(9)    | 110.92(16) |
| C(3)-C(4)-C(5)    | 111.82(16) |
| C(9)-C(4)-C(5)    | 110.47(14) |
| C(3)-C(4)-H(4)    | 107.8      |
| C(9)-C(4)-H(4)    | 107.8      |
| C(5)-C(4)-H(4)    | 107.8      |
| C(6)-C(5)-C(4)    | 112.25(16) |
| C(6)-C(5)-H(5A)   | 109.2      |
| C(4)-C(5)-H(5A)   | 109.2      |
| C(6)-C(5)-H(5AB)  | 109.2      |
| C(4)-C(5)-H(5AB)  | 109.2      |
| H(5A)-C(5)-H(5AB) | 107.9      |
| C(5)-C(6)-C(7)    | 112.16(15) |
| C(5)-C(6)-H(6A)   | 109.2      |
| C(7)-C(6)-H(6A)   | 109.2      |
| C(5)-C(6)-H(6AB)  | 109.2      |
| C(7)-C(6)-H(6AB)  | 109.2      |
| H(6A)-C(6)-H(6AB) | 107.9      |
| C(6)-C(7)-C(19)   | 110.31(15) |
| C(6)-C(7)-C(8)    | 111.37(15) |
| C(19)-C(7)-C(8)   | 111.87(16) |
| C(6)-C(7)-H(7)    | 107.7      |
| C(19)-C(7)-H(7)   | 107.7      |
| C(8)-C(7)-H(7)    | 107.7      |
| C(18)-C(8)-C(9)   | 111.81(14) |
| C(18)-C(8)-C(7)   | 112.30(14) |
| C(9)-C(8)-C(7)    | 109.69(15) |
| C(18)-C(8)-H(8)   | 107.6      |
| C(9)-C(8)-H(8)    | 107.6      |
| C(7)-C(8)-H(8)    | 107.6      |
| O(2)-C(9)-N(1)    | 103.10(13) |
| O(2)-C(9)-C(4)    | 110.87(15) |
| N(1)-C(9)-C(4)    | 108.44(14) |
| O(2)-C(9)-C(8)    | 106.89(13) |
| N(1)-C(9)-C(8)    | 113.99(15) |
| C(4)-C(9)-C(8)    | 113.10(14) |

|                     |            |
|---------------------|------------|
| O(2)-C(10)-C(11)    | 104.46(15) |
| O(2)-C(10)-H(10A)   | 110.9      |
| C(11)-C(10)-H(10A)  | 110.9      |
| O(2)-C(10)-H(10B)   | 110.9      |
| C(11)-C(10)-H(10B)  | 110.9      |
| H(10A)-C(10)-H(10B) | 108.9      |
| N(1)-C(11)-C(12)    | 112.50(16) |
| N(1)-C(11)-C(10)    | 99.61(14)  |
| C(12)-C(11)-C(10)   | 117.97(16) |
| N(1)-C(11)-H(11)    | 108.7      |
| C(12)-C(11)-H(11)   | 108.7      |
| C(10)-C(11)-H(11)   | 108.7      |
| C(17)-C(12)-C(13)   | 118.44(18) |
| C(17)-C(12)-C(11)   | 124.40(18) |
| C(13)-C(12)-C(11)   | 117.16(16) |
| C(14)-C(13)-C(12)   | 121.23(17) |
| C(14)-C(13)-H(13)   | 119.4      |
| C(12)-C(13)-H(13)   | 119.4      |
| C(15)-C(14)-C(13)   | 119.93(19) |
| C(15)-C(14)-H(14)   | 120.0      |
| C(13)-C(14)-H(14)   | 120.0      |
| C(14)-C(15)-C(16)   | 119.43(19) |
| C(14)-C(15)-H(15)   | 120.3      |
| C(16)-C(15)-H(15)   | 120.3      |
| C(17)-C(16)-C(15)   | 120.36(18) |
| C(17)-C(16)-H(16)   | 119.8      |
| C(15)-C(16)-H(16)   | 119.8      |
| C(12)-C(17)-C(16)   | 120.59(19) |
| C(12)-C(17)-H(17)   | 119.7      |
| C(16)-C(17)-H(17)   | 119.7      |
| C(8)-C(18)-H(18A)   | 109.5      |
| C(8)-C(18)-H(18B)   | 109.5      |
| H(18A)-C(18)-H(18B) | 109.5      |
| C(8)-C(18)-H(18C)   | 109.5      |
| H(18A)-C(18)-H(18C) | 109.5      |
| H(18B)-C(18)-H(18C) | 109.5      |

|                     |       |
|---------------------|-------|
| C(7)-C(19)-H(19A)   | 109.5 |
| C(7)-C(19)-H(19B)   | 109.5 |
| H(19A)-C(19)-H(19B) | 109.5 |
| C(7)-C(19)-H(19C)   | 109.5 |
| H(19A)-C(19)-H(19C) | 109.5 |
| H(19B)-C(19)-H(19C) | 109.5 |

---

Symmetry transformations used to generate equivalent atoms:

Table 4. Anisotropic displacement parameters ( $\text{\AA}^2 \times 10^3$ ) for D59ZB41\_0m\_a. The anisotropic displacement factor exponent takes the form:  $-2\pi^2 [ h^2 a^{*2} U^{11} + \dots + 2 h k a^* b^* U^{12} ]$

|       | U <sup>11</sup> | U <sup>22</sup> | U <sup>33</sup> | U <sup>23</sup> | U <sup>13</sup> | U <sup>12</sup> |
|-------|-----------------|-----------------|-----------------|-----------------|-----------------|-----------------|
| O(1)  | 40(1)           | 29(1)           | 18(1)           | 4(1)            | 8(1)            | 7(1)            |
| O(2)  | 20(1)           | 20(1)           | 17(1)           | 1(1)            | 2(1)            | -4(1)           |
| N(1)  | 20(1)           | 20(1)           | 15(1)           | 0(1)            | 3(1)            | 1(1)            |
| C(1)  | 32(1)           | 19(1)           | 21(1)           | 2(1)            | 11(1)           | 5(1)            |
| C(2)  | 31(1)           | 28(1)           | 27(1)           | 5(1)            | 16(1)           | 5(1)            |
| C(3)  | 27(1)           | 37(1)           | 22(1)           | 6(1)            | 12(1)           | 9(1)            |
| C(4)  | 24(1)           | 19(1)           | 18(1)           | -2(1)           | 5(1)            | 3(1)            |
| C(5)  | 22(1)           | 21(1)           | 23(1)           | 1(1)            | 7(1)            | 4(1)            |
| C(6)  | 21(1)           | 27(1)           | 18(1)           | 0(1)            | 3(1)            | 1(1)            |
| C(7)  | 21(1)           | 22(1)           | 18(1)           | 0(1)            | 6(1)            | -1(1)           |
| C(8)  | 19(1)           | 18(1)           | 18(1)           | -2(1)           | 6(1)            | -2(1)           |
| C(9)  | 20(1)           | 16(1)           | 16(1)           | 2(1)            | 5(1)            | -1(1)           |
| C(10) | 22(1)           | 18(1)           | 23(1)           | 1(1)            | 1(1)            | -3(1)           |
| C(11) | 22(1)           | 21(1)           | 18(1)           | -2(1)           | 2(1)            | -3(1)           |
| C(12) | 17(1)           | 18(1)           | 19(1)           | -1(1)           | -1(1)           | -4(1)           |
| C(13) | 20(1)           | 23(1)           | 20(1)           | 0(1)            | 3(1)            | -4(1)           |
| C(14) | 20(1)           | 21(1)           | 24(1)           | 2(1)            | 1(1)            | -2(1)           |
| C(15) | 19(1)           | 25(1)           | 27(1)           | -3(1)           | 3(1)            | 0(1)            |
| C(16) | 23(1)           | 32(1)           | 24(1)           | 0(1)            | 8(1)            | -3(1)           |
| C(17) | 24(1)           | 26(1)           | 21(1)           | 3(1)            | 3(1)            | -4(1)           |
| C(18) | 22(1)           | 21(1)           | 24(1)           | -2(1)           | 7(1)            | -1(1)           |
| C(19) | 29(1)           | 31(1)           | 20(1)           | -5(1)           | 3(1)            | 1(1)            |



Table 5. Hydrogen coordinates ( $\times 10^4$ ) and isotropic displacement parameters ( $\text{\AA}^2 \times 10^{-3}$ ) for D59ZB41\_0m\_a.

|        | x    | y    | z    | U(eq) |
|--------|------|------|------|-------|
| H(2A)  | 7079 | 6719 | 1589 | 32    |
| H(2AB) | 7140 | 5277 | 616  | 32    |
| H(3A)  | 8109 | 2600 | 1698 | 34    |
| H(3AB) | 8502 | 4327 | 2648 | 34    |
| H(4)   | 6388 | 1152 | 2128 | 26    |
| H(5A)  | 7253 | 425  | 3964 | 27    |
| H(5AB) | 8606 | 699  | 3635 | 27    |
| H(6A)  | 9035 | 4106 | 4388 | 28    |
| H(6AB) | 8914 | 2514 | 5291 | 28    |
| H(7)   | 6581 | 3609 | 4937 | 25    |
| H(8)   | 6870 | 6464 | 3340 | 22    |
| H(10A) | 2769 | 1406 | 2268 | 28    |
| H(10B) | 3914 | 530  | 1796 | 28    |
| H(11)  | 2988 | 3114 | 569  | 26    |
| H(13)  | 2405 | 7053 | 142  | 27    |
| H(14)  | 752  | 9642 | 96   | 28    |
| H(15)  | -359 | 9546 | 1356 | 30    |
| H(16)  | 186  | 6812 | 2646 | 32    |
| H(17)  | 1791 | 4158 | 2653 | 30    |
| H(18A) | 4424 | 7320 | 2947 | 33    |
| H(18B) | 5470 | 8168 | 4106 | 33    |
| H(18C) | 4538 | 6085 | 4031 | 33    |
| H(19A) | 8350 | 7283 | 5310 | 43    |
| H(19B) | 8450 | 5586 | 6234 | 43    |
| H(19C) | 7048 | 6983 | 5698 | 43    |

- C4 - C3 C5 C9 H4 sp3 R  
- C7 - C6 C8 C19 H7 sp3 R  
- C8 - C7 C9 C18 H8 sp3 S  
- C9 - O2 N1 C4 C8 sp3 R  
- C11 - N1 C10 C12 H11 sp3 R

Crystallographic data for compound **7b**:

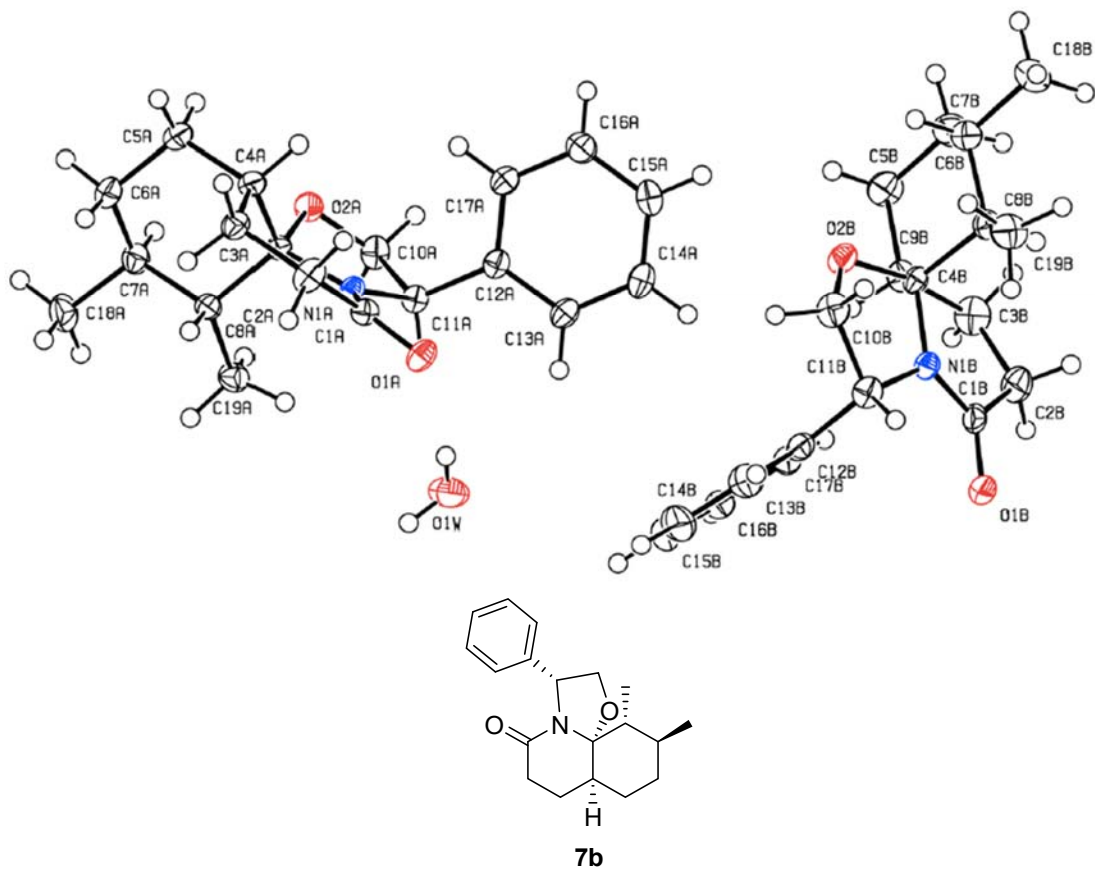

Table 1. Crystal data and structure refinement for **7b** (D59ZB7\_0m\_a).

|                                   |                                             |                               |
|-----------------------------------|---------------------------------------------|-------------------------------|
| Identification code               | D59ZB7_0m_a                                 |                               |
| Empirical formula                 | C76 H102 N4 O9                              |                               |
| Formula weight                    | 1215.61                                     |                               |
| Temperature                       | 100(2) K                                    |                               |
| Wavelength                        | 0.71073 Å                                   |                               |
| Crystal system                    | Monoclinic                                  |                               |
| Space group                       | C 2                                         |                               |
| Unit cell dimensions              | a = 28.4604(11) Å                           | $\alpha = 90^\circ$ .         |
|                                   | b = 8.5623(3) Å                             | $\beta = 92.7390(10)^\circ$ . |
|                                   | c = 13.3639(5) Å                            | $\gamma = 90^\circ$ .         |
| Volume                            | 3252.9(2) Å <sup>3</sup>                    |                               |
| Z                                 | 2                                           |                               |
| Density (calculated)              | 1.241 Mg/m <sup>3</sup>                     |                               |
| Absorption coefficient            | 0.080 mm <sup>-1</sup>                      |                               |
| F(000)                            | 1316                                        |                               |
| Crystal size                      | 0.600 x 0.390 x 0.300 mm <sup>3</sup>       |                               |
| Theta range for data collection   | 2.042 to 30.578°.                           |                               |
| Index ranges                      | -40 ≤ h ≤ 40, -12 ≤ k ≤ 12, -19 ≤ l ≤ 19    |                               |
| Reflections collected             | 27198                                       |                               |
| Independent reflections           | 9714 [R(int) = 0.0333]                      |                               |
| Completeness to theta = 25.242°   | 99.0 %                                      |                               |
| Absorption correction             | Semi-empirical from equivalents             |                               |
| Max. and min. transmission        | 0.7461 and 0.6337                           |                               |
| Refinement method                 | Full-matrix least-squares on F <sup>2</sup> |                               |
| Data / restraints / parameters    | 9714 / 3 / 409                              |                               |
| Goodness-of-fit on F <sup>2</sup> | 1.025                                       |                               |
| Final R indices [I > 2σ(I)]       | R1 = 0.0408, wR2 = 0.0914                   |                               |
| R indices (all data)              | R1 = 0.0476, wR2 = 0.0989                   |                               |
| Absolute structure parameter      | 0.5(3)                                      |                               |
| Extinction coefficient            | n/a                                         |                               |
| Largest diff. peak and hole       | 0.290 and -0.219 e.Å <sup>-3</sup>          |                               |

Table 2. Atomic coordinates ( $\times 10^4$ ) and equivalent isotropic displacement parameters ( $\text{\AA}^2 \times 10^3$ ) for D59ZB7\_0m\_a.  $U(\text{eq})$  is defined as one third of the trace of the orthogonalized  $U^{ij}$  tensor.

|        | x       | y        | z       | $U(\text{eq})$ |
|--------|---------|----------|---------|----------------|
| O(1A)  | 5465(1) | 960(2)   | 6455(1) | 25(1)          |
| O(2A)  | 4365(1) | 1777(2)  | 8710(1) | 23(1)          |
| N(1A)  | 4860(1) | 1184(2)  | 7485(1) | 18(1)          |
| C(1A)  | 5202(1) | 363(2)   | 7052(1) | 20(1)          |
| C(2A)  | 5278(1) | -1310(2) | 7389(2) | 27(1)          |
| C(3A)  | 4926(1) | -2028(2) | 8084(1) | 23(1)          |
| C(4A)  | 4702(1) | -797(2)  | 8745(1) | 21(1)          |
| C(5A)  | 4330(1) | -1473(3) | 9409(1) | 28(1)          |
| C(6A)  | 3888(1) | -1991(3) | 8808(2) | 29(1)          |
| C(7A)  | 3685(1) | -713(2)  | 8111(1) | 25(1)          |
| C(8A)  | 4064(1) | -84(2)   | 7426(1) | 20(1)          |
| C(9A)  | 4490(1) | 502(2)   | 8081(1) | 18(1)          |
| C(10A) | 4446(1) | 3218(2)  | 8199(2) | 24(1)          |
| C(11A) | 4843(1) | 2909(2)  | 7472(1) | 19(1)          |
| C(12A) | 5304(1) | 3651(2)  | 7826(1) | 20(1)          |
| C(13A) | 5536(1) | 4649(2)  | 7190(1) | 22(1)          |
| C(14A) | 5940(1) | 5444(2)  | 7534(2) | 26(1)          |
| C(15A) | 6115(1) | 5238(2)  | 8512(2) | 27(1)          |
| C(16A) | 5894(1) | 4212(3)  | 9143(2) | 28(1)          |
| C(17A) | 5489(1) | 3422(2)  | 8803(1) | 25(1)          |
| C(18A) | 3251(1) | -1331(3) | 7516(2) | 35(1)          |
| C(19A) | 3869(1) | 1118(2)  | 6667(1) | 26(1)          |
| O(1B)  | 7105(1) | 10468(2) | 4854(1) | 31(1)          |
| O(2B)  | 6942(1) | 7628(2)  | 7643(1) | 25(1)          |
| N(1B)  | 7092(1) | 9223(2)  | 6341(1) | 19(1)          |
| C(1B)  | 7060(1) | 10522(2) | 5761(1) | 23(1)          |
| C(2B)  | 6965(1) | 12025(2) | 6306(2) | 34(1)          |
| C(3B)  | 6678(1) | 11892(3) | 7252(2) | 34(1)          |
| C(4B)  | 6621(1) | 10230(2) | 7672(1) | 24(1)          |
| C(5B)  | 6540(1) | 10212(3) | 8795(2) | 33(1)          |
| C(6B)  | 6981(1) | 10648(3) | 9423(2) | 36(1)          |

|        |         |          |         |       |
|--------|---------|----------|---------|-------|
| C(7B)  | 7406(1) | 9657(3)  | 9170(2) | 30(1) |
| C(8B)  | 7493(1) | 9764(2)  | 8034(1) | 24(1) |
| C(9B)  | 7044(1) | 9225(2)  | 7435(1) | 19(1) |
| C(10B) | 7130(1) | 6674(2)  | 6877(2) | 29(1) |
| C(11B) | 7070(1) | 7651(2)  | 5916(1) | 24(1) |
| C(12B) | 6606(1) | 7270(2)  | 5348(1) | 24(1) |
| C(13B) | 6582(1) | 5834(2)  | 4847(2) | 35(1) |
| C(14B) | 6159(1) | 5317(3)  | 4405(2) | 44(1) |
| C(15B) | 5759(1) | 6236(3)  | 4435(2) | 40(1) |
| C(16B) | 5783(1) | 7687(3)  | 4895(2) | 31(1) |
| C(17B) | 6206(1) | 8197(2)  | 5352(1) | 25(1) |
| C(18B) | 7836(1) | 10137(3) | 9825(2) | 41(1) |
| C(19B) | 7939(1) | 8894(3)  | 7761(2) | 34(1) |
| O(1W)  | 5000    | 2973(3)  | 5000    | 40(1) |

---

Table 3. Bond lengths [Å] and angles [°] for D59ZB7\_0m\_a.

---

|               |          |
|---------------|----------|
| O(1A)-C(1A)   | 1.231(2) |
| O(2A)-C(9A)   | 1.433(2) |
| O(2A)-C(10A)  | 1.434(2) |
| N(1A)-C(1A)   | 1.352(2) |
| N(1A)-C(9A)   | 1.471(2) |
| N(1A)-C(11A)  | 1.478(2) |
| C(1A)-C(2A)   | 1.515(3) |
| C(2A)-C(3A)   | 1.528(3) |
| C(2A)-H(2AA)  | 0.9900   |
| C(2A)-H(2AB)  | 0.9900   |
| C(3A)-C(4A)   | 1.534(3) |
| C(3A)-H(3AA)  | 0.9900   |
| C(3A)-H(3AB)  | 0.9900   |
| C(4A)-C(5A)   | 1.528(3) |
| C(4A)-C(9A)   | 1.529(2) |
| C(4A)-H(4A)   | 1.0000   |
| C(5A)-C(6A)   | 1.527(3) |
| C(5A)-H(5AA)  | 0.9900   |
| C(5A)-H(5AB)  | 0.9900   |
| C(6A)-C(7A)   | 1.531(3) |
| C(6A)-H(6AA)  | 0.9900   |
| C(6A)-H(6AB)  | 0.9900   |
| C(7A)-C(18A)  | 1.532(3) |
| C(7A)-C(8A)   | 1.544(3) |
| C(7A)-H(7A)   | 1.0000   |
| C(8A)-C(19A)  | 1.530(3) |
| C(8A)-C(9A)   | 1.546(2) |
| C(8A)-H(8A)   | 1.0000   |
| C(10A)-C(11A) | 1.549(3) |
| C(10A)-H(10A) | 0.9900   |
| C(10A)-H(10B) | 0.9900   |
| C(11A)-C(12A) | 1.513(3) |
| C(11A)-H(11A) | 1.0000   |
| C(12A)-C(13A) | 1.393(3) |

|               |          |
|---------------|----------|
| C(12A)-C(17A) | 1.398(3) |
| C(13A)-C(14A) | 1.394(3) |
| C(13A)-H(13A) | 0.9500   |
| C(14A)-C(15A) | 1.387(3) |
| C(14A)-H(14A) | 0.9500   |
| C(15A)-C(16A) | 1.390(3) |
| C(15A)-H(15A) | 0.9500   |
| C(16A)-C(17A) | 1.393(3) |
| C(16A)-H(16A) | 0.9500   |
| C(17A)-H(17A) | 0.9500   |
| C(18A)-H(18A) | 0.9800   |
| C(18A)-H(18B) | 0.9800   |
| C(18A)-H(18C) | 0.9800   |
| C(19A)-H(19A) | 0.9800   |
| C(19A)-H(19B) | 0.9800   |
| C(19A)-H(19C) | 0.9800   |
| O(1B)-C(1B)   | 1.226(2) |
| O(2B)-C(9B)   | 1.429(2) |
| O(2B)-C(10B)  | 1.433(3) |
| N(1B)-C(1B)   | 1.355(2) |
| N(1B)-C(11B)  | 1.461(2) |
| N(1B)-C(9B)   | 1.475(2) |
| C(1B)-C(2B)   | 1.509(3) |
| C(2B)-C(3B)   | 1.542(3) |
| C(2B)-H(2BA)  | 0.9900   |
| C(2B)-H(2BB)  | 0.9900   |
| C(3B)-C(4B)   | 1.542(3) |
| C(3B)-H(3BA)  | 0.9900   |
| C(3B)-H(3BB)  | 0.9900   |
| C(4B)-C(9B)   | 1.525(2) |
| C(4B)-C(5B)   | 1.530(3) |
| C(4B)-H(4B)   | 1.0000   |
| C(5B)-C(6B)   | 1.523(3) |
| C(5B)-H(5BA)  | 0.9900   |
| C(5B)-H(5BB)  | 0.9900   |
| C(6B)-C(7B)   | 1.528(3) |



|                    |            |
|--------------------|------------|
| C(6B)-H(6BA)       | 0.9900     |
| C(6B)-H(6BB)       | 0.9900     |
| C(7B)-C(18B)       | 1.526(3)   |
| C(7B)-C(8B)        | 1.553(3)   |
| C(7B)-H(7B)        | 1.0000     |
| C(8B)-C(19B)       | 1.531(3)   |
| C(8B)-C(9B)        | 1.547(2)   |
| C(8B)-H(8B)        | 1.0000     |
| C(10B)-C(11B)      | 1.535(3)   |
| C(10B)-H(10C)      | 0.9900     |
| C(10B)-H(10D)      | 0.9900     |
| C(11B)-C(12B)      | 1.526(3)   |
| C(11B)-H(11B)      | 1.0000     |
| C(12B)-C(17B)      | 1.389(3)   |
| C(12B)-C(13B)      | 1.400(3)   |
| C(13B)-C(14B)      | 1.388(4)   |
| C(13B)-H(13B)      | 0.9500     |
| C(14B)-C(15B)      | 1.385(4)   |
| C(14B)-H(14B)      | 0.9500     |
| C(15B)-C(16B)      | 1.386(3)   |
| C(15B)-H(15B)      | 0.9500     |
| C(16B)-C(17B)      | 1.394(3)   |
| C(16B)-H(16B)      | 0.9500     |
| C(17B)-H(17B)      | 0.9500     |
| C(18B)-H(18D)      | 0.9800     |
| C(18B)-H(18E)      | 0.9800     |
| C(18B)-H(18F)      | 0.9800     |
| C(19B)-H(19D)      | 0.9800     |
| C(19B)-H(19E)      | 0.9800     |
| C(19B)-H(19F)      | 0.9800     |
| O(1W)-H(1WA)       | 0.834(12)  |
| O(1W)-H(1WA)#1     | 0.834(12)  |
| C(9A)-O(2A)-C(10A) | 109.05(13) |
| C(1A)-N(1A)-C(9A)  | 124.98(15) |
| C(1A)-N(1A)-C(11A) | 122.56(15) |

|                     |            |
|---------------------|------------|
| C(9A)-N(1A)-C(11A)  | 112.29(14) |
| O(1A)-C(1A)-N(1A)   | 122.27(17) |
| O(1A)-C(1A)-C(2A)   | 120.14(16) |
| N(1A)-C(1A)-C(2A)   | 117.42(16) |
| C(1A)-C(2A)-C(3A)   | 118.18(16) |
| C(1A)-C(2A)-H(2AA)  | 107.8      |
| C(3A)-C(2A)-H(2AA)  | 107.8      |
| C(1A)-C(2A)-H(2AB)  | 107.8      |
| C(3A)-C(2A)-H(2AB)  | 107.8      |
| H(2AA)-C(2A)-H(2AB) | 107.1      |
| C(2A)-C(3A)-C(4A)   | 112.07(15) |
| C(2A)-C(3A)-H(3AA)  | 109.2      |
| C(4A)-C(3A)-H(3AA)  | 109.2      |
| C(2A)-C(3A)-H(3AB)  | 109.2      |
| C(4A)-C(3A)-H(3AB)  | 109.2      |
| H(3AA)-C(3A)-H(3AB) | 107.9      |
| C(5A)-C(4A)-C(9A)   | 110.32(15) |
| C(5A)-C(4A)-C(3A)   | 113.08(16) |
| C(9A)-C(4A)-C(3A)   | 109.15(13) |
| C(5A)-C(4A)-H(4A)   | 108.0      |
| C(9A)-C(4A)-H(4A)   | 108.0      |
| C(3A)-C(4A)-H(4A)   | 108.0      |
| C(6A)-C(5A)-C(4A)   | 112.45(15) |
| C(6A)-C(5A)-H(5AA)  | 109.1      |
| C(4A)-C(5A)-H(5AA)  | 109.1      |
| C(6A)-C(5A)-H(5AB)  | 109.1      |
| C(4A)-C(5A)-H(5AB)  | 109.1      |
| H(5AA)-C(5A)-H(5AB) | 107.8      |
| C(5A)-C(6A)-C(7A)   | 112.94(17) |
| C(5A)-C(6A)-H(6AA)  | 109.0      |
| C(7A)-C(6A)-H(6AA)  | 109.0      |
| C(5A)-C(6A)-H(6AB)  | 109.0      |
| C(7A)-C(6A)-H(6AB)  | 109.0      |
| H(6AA)-C(6A)-H(6AB) | 107.8      |
| C(6A)-C(7A)-C(18A)  | 109.85(17) |
| C(6A)-C(7A)-C(8A)   | 110.91(16) |

|                      |            |
|----------------------|------------|
| C(18A)-C(7A)-C(8A)   | 112.41(16) |
| C(6A)-C(7A)-H(7A)    | 107.8      |
| C(18A)-C(7A)-H(7A)   | 107.8      |
| C(8A)-C(7A)-H(7A)    | 107.8      |
| C(19A)-C(8A)-C(7A)   | 112.73(15) |
| C(19A)-C(8A)-C(9A)   | 114.01(15) |
| C(7A)-C(8A)-C(9A)    | 109.17(14) |
| C(19A)-C(8A)-H(8A)   | 106.8      |
| C(7A)-C(8A)-H(8A)    | 106.8      |
| C(9A)-C(8A)-H(8A)    | 106.8      |
| O(2A)-C(9A)-N(1A)    | 102.71(13) |
| O(2A)-C(9A)-C(4A)    | 108.39(13) |
| N(1A)-C(9A)-C(4A)    | 109.30(14) |
| O(2A)-C(9A)-C(8A)    | 111.63(14) |
| N(1A)-C(9A)-C(8A)    | 112.64(13) |
| C(4A)-C(9A)-C(8A)    | 111.74(15) |
| O(2A)-C(10A)-C(11A)  | 106.87(14) |
| O(2A)-C(10A)-H(10A)  | 110.3      |
| C(11A)-C(10A)-H(10A) | 110.3      |
| O(2A)-C(10A)-H(10B)  | 110.3      |
| C(11A)-C(10A)-H(10B) | 110.3      |
| H(10A)-C(10A)-H(10B) | 108.6      |
| N(1A)-C(11A)-C(12A)  | 112.88(14) |
| N(1A)-C(11A)-C(10A)  | 100.82(14) |
| C(12A)-C(11A)-C(10A) | 112.34(14) |
| N(1A)-C(11A)-H(11A)  | 110.2      |
| C(12A)-C(11A)-H(11A) | 110.2      |
| C(10A)-C(11A)-H(11A) | 110.2      |
| C(13A)-C(12A)-C(17A) | 119.16(17) |
| C(13A)-C(12A)-C(11A) | 119.74(16) |
| C(17A)-C(12A)-C(11A) | 121.00(16) |
| C(12A)-C(13A)-C(14A) | 120.36(17) |
| C(12A)-C(13A)-H(13A) | 119.8      |
| C(14A)-C(13A)-H(13A) | 119.8      |
| C(15A)-C(14A)-C(13A) | 120.15(18) |
| C(15A)-C(14A)-H(14A) | 119.9      |

|                      |            |
|----------------------|------------|
| C(13A)-C(14A)-H(14A) | 119.9      |
| C(14A)-C(15A)-C(16A) | 119.87(18) |
| C(14A)-C(15A)-H(15A) | 120.1      |
| C(16A)-C(15A)-H(15A) | 120.1      |
| C(15A)-C(16A)-C(17A) | 120.11(18) |
| C(15A)-C(16A)-H(16A) | 119.9      |
| C(17A)-C(16A)-H(16A) | 119.9      |
| C(16A)-C(17A)-C(12A) | 120.30(18) |
| C(16A)-C(17A)-H(17A) | 119.9      |
| C(12A)-C(17A)-H(17A) | 119.9      |
| C(7A)-C(18A)-H(18A)  | 109.5      |
| C(7A)-C(18A)-H(18B)  | 109.5      |
| H(18A)-C(18A)-H(18B) | 109.5      |
| C(7A)-C(18A)-H(18C)  | 109.5      |
| H(18A)-C(18A)-H(18C) | 109.5      |
| H(18B)-C(18A)-H(18C) | 109.5      |
| C(8A)-C(19A)-H(19A)  | 109.5      |
| C(8A)-C(19A)-H(19B)  | 109.5      |
| H(19A)-C(19A)-H(19B) | 109.5      |
| C(8A)-C(19A)-H(19C)  | 109.5      |
| H(19A)-C(19A)-H(19C) | 109.5      |
| H(19B)-C(19A)-H(19C) | 109.5      |
| C(9B)-O(2B)-C(10B)   | 108.67(14) |
| C(1B)-N(1B)-C(11B)   | 122.25(15) |
| C(1B)-N(1B)-C(9B)    | 123.95(15) |
| C(11B)-N(1B)-C(9B)   | 112.43(14) |
| O(1B)-C(1B)-N(1B)    | 121.80(19) |
| O(1B)-C(1B)-C(2B)    | 122.56(18) |
| N(1B)-C(1B)-C(2B)    | 115.64(16) |
| C(1B)-C(2B)-C(3B)    | 116.52(17) |
| C(1B)-C(2B)-H(2BA)   | 108.2      |
| C(3B)-C(2B)-H(2BA)   | 108.2      |
| C(1B)-C(2B)-H(2BB)   | 108.2      |
| C(3B)-C(2B)-H(2BB)   | 108.2      |
| H(2BA)-C(2B)-H(2BB)  | 107.3      |
| C(4B)-C(3B)-C(2B)    | 115.83(17) |

|                     |            |
|---------------------|------------|
| C(4B)-C(3B)-H(3BA)  | 108.3      |
| C(2B)-C(3B)-H(3BA)  | 108.3      |
| C(4B)-C(3B)-H(3BB)  | 108.3      |
| C(2B)-C(3B)-H(3BB)  | 108.3      |
| H(3BA)-C(3B)-H(3BB) | 107.4      |
| C(9B)-C(4B)-C(5B)   | 110.85(16) |
| C(9B)-C(4B)-C(3B)   | 110.31(16) |
| C(5B)-C(4B)-C(3B)   | 112.97(18) |
| C(9B)-C(4B)-H(4B)   | 107.5      |
| C(5B)-C(4B)-H(4B)   | 107.5      |
| C(3B)-C(4B)-H(4B)   | 107.5      |
| C(6B)-C(5B)-C(4B)   | 112.24(17) |
| C(6B)-C(5B)-H(5BA)  | 109.2      |
| C(4B)-C(5B)-H(5BA)  | 109.2      |
| C(6B)-C(5B)-H(5BB)  | 109.2      |
| C(4B)-C(5B)-H(5BB)  | 109.2      |
| H(5BA)-C(5B)-H(5BB) | 107.9      |
| C(5B)-C(6B)-C(7B)   | 112.49(18) |
| C(5B)-C(6B)-H(6BA)  | 109.1      |
| C(7B)-C(6B)-H(6BA)  | 109.1      |
| C(5B)-C(6B)-H(6BB)  | 109.1      |
| C(7B)-C(6B)-H(6BB)  | 109.1      |
| H(6BA)-C(6B)-H(6BB) | 107.8      |
| C(18B)-C(7B)-C(6B)  | 110.18(19) |
| C(18B)-C(7B)-C(8B)  | 112.52(18) |
| C(6B)-C(7B)-C(8B)   | 110.37(17) |
| C(18B)-C(7B)-H(7B)  | 107.9      |
| C(6B)-C(7B)-H(7B)   | 107.9      |
| C(8B)-C(7B)-H(7B)   | 107.9      |
| C(19B)-C(8B)-C(9B)  | 113.95(16) |
| C(19B)-C(8B)-C(7B)  | 112.17(17) |
| C(9B)-C(8B)-C(7B)   | 108.74(15) |
| C(19B)-C(8B)-H(8B)  | 107.2      |
| C(9B)-C(8B)-H(8B)   | 107.2      |
| C(7B)-C(8B)-H(8B)   | 107.2      |
| O(2B)-C(9B)-N(1B)   | 102.78(14) |

|                      |            |
|----------------------|------------|
| O(2B)-C(9B)-C(4B)    | 109.24(14) |
| N(1B)-C(9B)-C(4B)    | 108.56(14) |
| O(2B)-C(9B)-C(8B)    | 110.84(14) |
| N(1B)-C(9B)-C(8B)    | 113.56(14) |
| C(4B)-C(9B)-C(8B)    | 111.45(15) |
| O(2B)-C(10B)-C(11B)  | 104.84(15) |
| O(2B)-C(10B)-H(10C)  | 110.8      |
| C(11B)-C(10B)-H(10C) | 110.8      |
| O(2B)-C(10B)-H(10D)  | 110.8      |
| C(11B)-C(10B)-H(10D) | 110.8      |
| H(10C)-C(10B)-H(10D) | 108.9      |
| N(1B)-C(11B)-C(12B)  | 114.22(15) |
| N(1B)-C(11B)-C(10B)  | 100.17(15) |
| C(12B)-C(11B)-C(10B) | 111.06(16) |
| N(1B)-C(11B)-H(11B)  | 110.3      |
| C(12B)-C(11B)-H(11B) | 110.3      |
| C(10B)-C(11B)-H(11B) | 110.3      |
| C(17B)-C(12B)-C(13B) | 118.85(19) |
| C(17B)-C(12B)-C(11B) | 124.43(16) |
| C(13B)-C(12B)-C(11B) | 116.58(19) |
| C(14B)-C(13B)-C(12B) | 120.4(2)   |
| C(14B)-C(13B)-H(13B) | 119.8      |
| C(12B)-C(13B)-H(13B) | 119.8      |
| C(15B)-C(14B)-C(13B) | 120.2(2)   |
| C(15B)-C(14B)-H(14B) | 119.9      |
| C(13B)-C(14B)-H(14B) | 119.9      |
| C(14B)-C(15B)-C(16B) | 120.0(2)   |
| C(14B)-C(15B)-H(15B) | 120.0      |
| C(16B)-C(15B)-H(15B) | 120.0      |
| C(15B)-C(16B)-C(17B) | 119.9(2)   |
| C(15B)-C(16B)-H(16B) | 120.1      |
| C(17B)-C(16B)-H(16B) | 120.1      |
| C(12B)-C(17B)-C(16B) | 120.68(19) |
| C(12B)-C(17B)-H(17B) | 119.7      |
| C(16B)-C(17B)-H(17B) | 119.7      |
| C(7B)-C(18B)-H(18D)  | 109.5      |

|                       |        |
|-----------------------|--------|
| C(7B)-C(18B)-H(18E)   | 109.5  |
| H(18D)-C(18B)-H(18E)  | 109.5  |
| C(7B)-C(18B)-H(18F)   | 109.5  |
| H(18D)-C(18B)-H(18F)  | 109.5  |
| H(18E)-C(18B)-H(18F)  | 109.5  |
| C(8B)-C(19B)-H(19D)   | 109.5  |
| C(8B)-C(19B)-H(19E)   | 109.5  |
| H(19D)-C(19B)-H(19E)  | 109.5  |
| C(8B)-C(19B)-H(19F)   | 109.5  |
| H(19D)-C(19B)-H(19F)  | 109.5  |
| H(19E)-C(19B)-H(19F)  | 109.5  |
| H(1WA)-O(1W)-H(1WA)#1 | 107(4) |

---

Symmetry transformations used to generate equivalent atoms:

#1 -x+1,y,-z+1

Table 4. Anisotropic displacement parameters ( $\text{\AA}^2 \times 10^3$ ) for D59ZB7\_0m\_a. The anisotropic displacement factor exponent takes the form:  $-2\pi^2 [ h^2 a^{*2} U^{11} + \dots + 2 h k a^* b^* U^{12} ]$

|        | U <sup>11</sup> | U <sup>22</sup> | U <sup>33</sup> | U <sup>23</sup> | U <sup>13</sup> | U <sup>12</sup> |
|--------|-----------------|-----------------|-----------------|-----------------|-----------------|-----------------|
| O(1A)  | 24(1)           | 24(1)           | 26(1)           | 3(1)            | 11(1)           | 2(1)            |
| O(2A)  | 26(1)           | 23(1)           | 21(1)           | -6(1)           | 7(1)            | -2(1)           |
| N(1A)  | 17(1)           | 18(1)           | 18(1)           | 0(1)            | 5(1)            | 0(1)            |
| C(1A)  | 18(1)           | 23(1)           | 19(1)           | 0(1)            | 2(1)            | 2(1)            |
| C(2A)  | 28(1)           | 22(1)           | 32(1)           | 4(1)            | 10(1)           | 5(1)            |
| C(3A)  | 24(1)           | 21(1)           | 23(1)           | 4(1)            | 1(1)            | 0(1)            |
| C(4A)  | 21(1)           | 25(1)           | 17(1)           | 2(1)            | 1(1)            | -2(1)           |
| C(5A)  | 28(1)           | 35(1)           | 21(1)           | 6(1)            | 2(1)            | -6(1)           |
| C(6A)  | 26(1)           | 34(1)           | 27(1)           | 5(1)            | 4(1)            | -9(1)           |
| C(7A)  | 20(1)           | 29(1)           | 26(1)           | 0(1)            | 4(1)            | -4(1)           |
| C(8A)  | 20(1)           | 22(1)           | 19(1)           | -1(1)           | 1(1)            | -1(1)           |
| C(9A)  | 18(1)           | 20(1)           | 16(1)           | -2(1)           | 3(1)            | -1(1)           |
| C(10A) | 22(1)           | 22(1)           | 30(1)           | -4(1)           | 8(1)            | 1(1)            |
| C(11A) | 18(1)           | 18(1)           | 21(1)           | -1(1)           | 4(1)            | 2(1)            |
| C(12A) | 21(1)           | 18(1)           | 22(1)           | -1(1)           | 6(1)            | 1(1)            |
| C(13A) | 23(1)           | 20(1)           | 25(1)           | 4(1)            | 5(1)            | 3(1)            |
| C(14A) | 23(1)           | 19(1)           | 35(1)           | 3(1)            | 7(1)            | 1(1)            |
| C(15A) | 21(1)           | 24(1)           | 36(1)           | -4(1)           | 2(1)            | -3(1)           |
| C(16A) | 26(1)           | 34(1)           | 25(1)           | -2(1)           | 1(1)            | -4(1)           |
| C(17A) | 25(1)           | 28(1)           | 22(1)           | 1(1)            | 5(1)            | -3(1)           |
| C(18A) | 22(1)           | 38(1)           | 43(1)           | 2(1)            | -3(1)           | -9(1)           |
| C(19A) | 24(1)           | 27(1)           | 26(1)           | 1(1)            | -3(1)           | 1(1)            |
| O(1B)  | 29(1)           | 39(1)           | 25(1)           | 7(1)            | -1(1)           | -12(1)          |
| O(2B)  | 30(1)           | 21(1)           | 25(1)           | 5(1)            | 4(1)            | -1(1)           |
| N(1B)  | 18(1)           | 20(1)           | 21(1)           | 1(1)            | 4(1)            | 0(1)            |
| C(1B)  | 18(1)           | 24(1)           | 27(1)           | 6(1)            | -2(1)           | -5(1)           |
| C(2B)  | 42(1)           | 20(1)           | 39(1)           | 5(1)            | -1(1)           | -3(1)           |
| C(3B)  | 34(1)           | 24(1)           | 43(1)           | -2(1)           | 4(1)            | 8(1)            |
| C(4B)  | 17(1)           | 27(1)           | 28(1)           | -2(1)           | 4(1)            | 2(1)            |
| C(5B)  | 25(1)           | 45(1)           | 30(1)           | -4(1)           | 12(1)           | 2(1)            |
| C(6B)  | 34(1)           | 48(1)           | 27(1)           | -8(1)           | 7(1)            | -3(1)           |



|        |       |       |       |       |       |        |
|--------|-------|-------|-------|-------|-------|--------|
| C(7B)  | 30(1) | 35(1) | 24(1) | 2(1)  | -1(1) | -5(1)  |
| C(8B)  | 18(1) | 28(1) | 25(1) | 2(1)  | 2(1)  | -1(1)  |
| C(9B)  | 16(1) | 19(1) | 21(1) | 2(1)  | 4(1)  | 0(1)   |
| C(10B) | 32(1) | 19(1) | 36(1) | 1(1)  | 1(1)  | 6(1)   |
| C(11B) | 23(1) | 22(1) | 27(1) | -3(1) | 8(1)  | 4(1)   |
| C(12B) | 32(1) | 21(1) | 19(1) | 0(1)  | 6(1)  | -5(1)  |
| C(13B) | 50(1) | 23(1) | 31(1) | -3(1) | 4(1)  | -1(1)  |
| C(14B) | 68(2) | 27(1) | 36(1) | -6(1) | -4(1) | -14(1) |
| C(15B) | 49(1) | 41(1) | 31(1) | 2(1)  | -6(1) | -24(1) |
| C(16B) | 31(1) | 40(1) | 23(1) | 3(1)  | 2(1)  | -9(1)  |
| C(17B) | 28(1) | 26(1) | 20(1) | -2(1) | 4(1)  | -5(1)  |
| C(18B) | 40(1) | 50(1) | 32(1) | 0(1)  | -7(1) | -9(1)  |
| C(19B) | 18(1) | 49(1) | 36(1) | 2(1)  | 1(1)  | 6(1)   |
| O(1W)  | 61(2) | 30(1) | 27(1) | 0     | -8(1) | 0      |

---

Table 5. Hydrogen coordinates ( $\times 10^4$ ) and isotropic displacement parameters ( $\text{\AA}^2 \times 10^{-3}$ ) for D59ZB7\_0m\_a.

|        | x    | y     | z    | U(eq) |
|--------|------|-------|------|-------|
| H(2AA) | 5594 | -1376 | 7730 | 33    |
| H(2AB) | 5284 | -1971 | 6782 | 33    |
| H(3AA) | 5088 | -2820 | 8516 | 27    |
| H(3AB) | 4675 | -2565 | 7676 | 27    |
| H(4A)  | 4957 | -329  | 9191 | 25    |
| H(5AA) | 4465 | -2380 | 9782 | 33    |
| H(5AB) | 4244 | -676  | 9904 | 33    |
| H(6AA) | 3646 | -2303 | 9277 | 35    |
| H(6AB) | 3963 | -2918 | 8403 | 35    |
| H(7A)  | 3582 | 171   | 8538 | 30    |
| H(8A)  | 4176 | -994  | 7032 | 24    |
| H(10A) | 4542 | 4044  | 8686 | 29    |
| H(10B) | 4156 | 3561  | 7823 | 29    |
| H(11A) | 4747 | 3291  | 6785 | 23    |
| H(13A) | 5419 | 4788  | 6519 | 27    |
| H(14A) | 6095 | 6129  | 7099 | 31    |
| H(15A) | 6387 | 5796  | 8749 | 32    |
| H(16A) | 6018 | 4050  | 9807 | 34    |
| H(17A) | 5338 | 2725  | 9238 | 30    |
| H(18A) | 3017 | -1686 | 7982 | 52    |
| H(18B) | 3342 | -2207 | 7095 | 52    |
| H(18C) | 3115 | -496  | 7092 | 52    |
| H(19A) | 3708 | 1950  | 7020 | 38    |
| H(19B) | 3645 | 607   | 6191 | 38    |
| H(19C) | 4128 | 1565  | 6304 | 38    |
| H(2BA) | 6797 | 12741 | 5830 | 40    |
| H(2BB) | 7271 | 12515 | 6499 | 40    |
| H(3BA) | 6831 | 12550 | 7783 | 40    |
| H(3BB) | 6361 | 12330 | 7097 | 40    |
| H(4B)  | 6337 | 9756  | 7320 | 29    |

|        |         |          |          |    |
|--------|---------|----------|----------|----|
| H(5BA) | 6285    | 10956    | 8938     | 40 |
| H(5BB) | 6436    | 9156     | 8990     | 40 |
| H(6BA) | 6920    | 10515    | 10141    | 44 |
| H(6BB) | 7054    | 11763    | 9311     | 44 |
| H(7B)  | 7332    | 8544     | 9327     | 36 |
| H(8B)  | 7541    | 10893    | 7874     | 28 |
| H(10C) | 6955    | 5678     | 6807     | 35 |
| H(10D) | 7466    | 6440     | 7034     | 35 |
| H(11B) | 7340    | 7472     | 5479     | 29 |
| H(13B) | 6857    | 5210     | 4810     | 42 |
| H(14B) | 6144    | 4329     | 4081     | 53 |
| H(15B) | 5469    | 5873     | 4140     | 49 |
| H(16B) | 5512    | 8332     | 4899     | 37 |
| H(17B) | 6221    | 9190     | 5670     | 29 |
| H(18D) | 7757    | 10120    | 10531    | 62 |
| H(18E) | 7933    | 11193    | 9642     | 62 |
| H(18F) | 8094    | 9405     | 9722     | 62 |
| H(19D) | 7938    | 7843     | 8051     | 51 |
| H(19E) | 8216    | 9465     | 8026     | 51 |
| H(19F) | 7949    | 8817     | 7030     | 51 |
| H(1WA) | 5170(9) | 2400(30) | 5368(19) | 48 |

---

Table 6. Hydrogen bonds for D59ZB7\_0m\_a.

---

| Donor --- H...Acceptor | [ ARU ] | D - H   | H...A   | D...A    | D - H...A |
|------------------------|---------|---------|---------|----------|-----------|
| O1W --H1WA ..O1A       | [ ]     | 0.83(3) | 2.05(3) | 2.874(2) | 168(2)    |
| -----                  |         |         |         |          |           |
| C4A - C3A              | C5A     | C9A     | H4A     | sp3      | S         |
| C7A - C6A              | C8A     | C18A    | H7A     | sp3      | S         |
| C8A - C7A              | C9A     | C19A    | H8A     | sp3      | R         |
| C9A - O2A              | N1A     | C4A     | C8A     | sp3      | S         |
| C11A - N1A             | C10A    | C12A    | H11A    | sp3      | R         |
|                        |         |         |         |          |           |
| C4B - C3B              | C5B     | C9B     | H4B     | sp3      | S         |
| C7B - C6B              | C8B     | C18B    | H7B     | sp3      | S         |
| C8B - C7B              | C9B     | C19B    | H8B     | sp3      | R         |
| C9B - O2B              | N1B     | C4B     | C8B     | sp3      | S         |
| C11B - N1B             | C10B    | C12B    | H11B    | sp3      | R         |

Crystallographic data for compound **7d**:

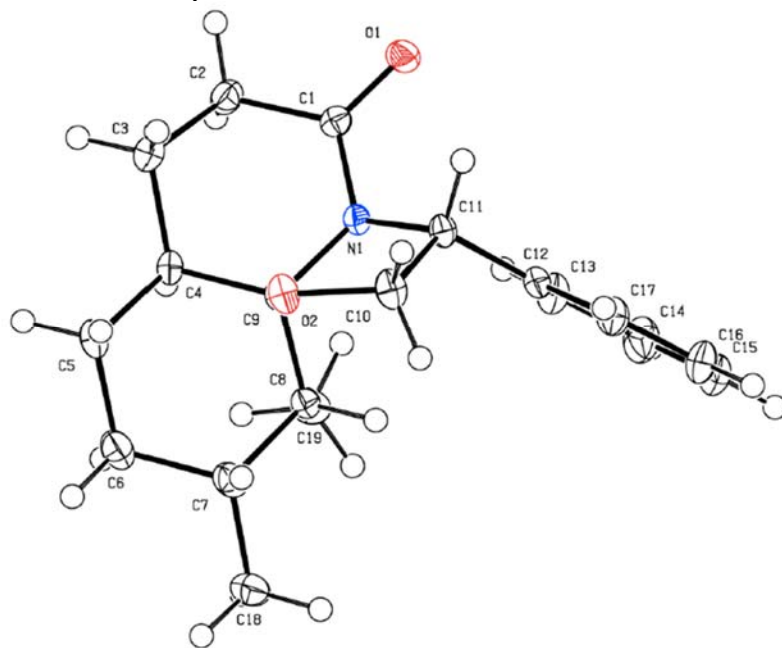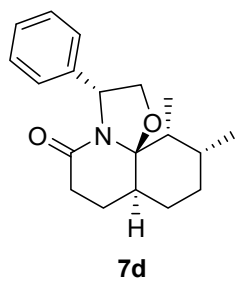

Table 1. Crystal data and structure refinement for **7d** (D59ZB2\_0m\_a).

|                                   |                                                  |                 |
|-----------------------------------|--------------------------------------------------|-----------------|
| Identification code               | D59ZB2_0m_a                                      |                 |
| Empirical formula                 | C <sub>19</sub> H <sub>25</sub> N O <sub>2</sub> |                 |
| Formula weight                    | 299.40                                           |                 |
| Temperature                       | 100(2) K                                         |                 |
| Wavelength                        | 0.71073 Å                                        |                 |
| Crystal system                    | Monoclinic                                       |                 |
| Space group                       | P 21                                             |                 |
| Unit cell dimensions              | a = 8.0138(5) Å                                  | α = 90°.        |
|                                   | b = 6.3391(3) Å                                  | β = 93.122(2)°. |
|                                   | c = 16.0011(9) Å                                 | γ = 90°.        |
| Volume                            | 811.65(8) Å <sup>3</sup>                         |                 |
| Z                                 | 2                                                |                 |
| Density (calculated)              | 1.225 Mg/m <sup>3</sup>                          |                 |
| Absorption coefficient            | 0.079 mm <sup>-1</sup>                           |                 |
| F(000)                            | 324                                              |                 |
| Crystal size                      | 0.250 x 0.150 x 0.139 mm <sup>3</sup>            |                 |
| Theta range for data collection   | 3.701 to 30.636°.                                |                 |
| Index ranges                      | -11 ≤ h ≤ 11, -8 ≤ k ≤ 9, -22 ≤ l ≤ 22           |                 |
| Reflections collected             | 17964                                            |                 |
| Independent reflections           | 4884 [R(int) = 0.0236]                           |                 |
| Completeness to theta = 25.242°   | 97.8 %                                           |                 |
| Absorption correction             | Semi-empirical from equivalents                  |                 |
| Max. and min. transmission        | 0.7461 and 0.6752                                |                 |
| Refinement method                 | Full-matrix least-squares on F <sup>2</sup>      |                 |
| Data / restraints / parameters    | 4884 / 1 / 201                                   |                 |
| Goodness-of-fit on F <sup>2</sup> | 1.098                                            |                 |
| Final R indices [I > 2σ(I)]       | R1 = 0.0343, wR2 = 0.0915                        |                 |
| R indices (all data)              | R1 = 0.0356, wR2 = 0.0931                        |                 |
| Absolute structure parameter      | -0.2(2)                                          |                 |
| Extinction coefficient            | n/a                                              |                 |
| Largest diff. peak and hole       | 0.365 and -0.164 e.Å <sup>-3</sup>               |                 |

Table 2. Atomic coordinates ( $\times 10^4$ ) and equivalent isotropic displacement parameters ( $\text{\AA}^2 \times 10^3$ ) for D59ZB2\_0m\_a.  $U(\text{eq})$  is defined as one third of the trace of the orthogonalized  $U^{ij}$  tensor.

|       | x        | y       | z       | $U(\text{eq})$ |
|-------|----------|---------|---------|----------------|
| O(1)  | 11072(1) | 2202(2) | 2632(1) | 21(1)          |
| O(2)  | 8374(1)  | 7664(2) | 2064(1) | 19(1)          |
| N(1)  | 8781(1)  | 4278(2) | 2462(1) | 15(1)          |
| C(1)  | 9979(2)  | 2969(2) | 2162(1) | 16(1)          |
| C(2)  | 9909(2)  | 2531(2) | 1232(1) | 22(1)          |
| C(3)  | 9324(2)  | 4459(3) | 722(1)  | 22(1)          |
| C(4)  | 7608(2)  | 5068(2) | 1002(1) | 17(1)          |
| C(5)  | 6713(2)  | 6845(2) | 515(1)  | 22(1)          |
| C(6)  | 4914(2)  | 7028(3) | 797(1)  | 26(1)          |
| C(7)  | 4835(2)  | 7297(2) | 1745(1) | 23(1)          |
| C(8)  | 5845(2)  | 5580(2) | 2234(1) | 16(1)          |
| C(9)  | 7651(2)  | 5609(2) | 1933(1) | 14(1)          |
| C(10) | 8838(2)  | 7784(2) | 2944(1) | 20(1)          |
| C(11) | 9261(2)  | 5491(2) | 3226(1) | 16(1)          |
| C(12) | 8434(2)  | 4806(2) | 4009(1) | 18(1)          |
| C(13) | 7647(2)  | 2859(3) | 4062(1) | 24(1)          |
| C(14) | 6911(2)  | 2252(3) | 4794(1) | 33(1)          |
| C(15) | 6980(2)  | 3587(4) | 5480(1) | 35(1)          |
| C(16) | 7788(2)  | 5511(4) | 5443(1) | 33(1)          |
| C(17) | 8516(2)  | 6121(3) | 4710(1) | 26(1)          |
| C(18) | 3034(2)  | 7415(3) | 1995(1) | 28(1)          |
| C(19) | 5064(2)  | 3382(2) | 2184(1) | 22(1)          |

Table 3. Bond lengths [Å] and angles [°] for D59ZB2\_0m\_a.

---

|              |            |
|--------------|------------|
| O(1)-C(1)    | 1.2233(16) |
| O(2)-C(9)    | 1.4363(15) |
| O(2)-C(10)   | 1.4379(16) |
| N(1)-C(1)    | 1.3747(17) |
| N(1)-C(9)    | 1.4714(16) |
| N(1)-C(11)   | 1.4773(16) |
| C(1)-C(2)    | 1.5125(18) |
| C(2)-C(3)    | 1.529(2)   |
| C(2)-H(2A)   | 0.9900     |
| C(2)-H(2B)   | 0.9900     |
| C(3)-C(4)    | 1.5185(19) |
| C(3)-H(3A)   | 0.9900     |
| C(3)-H(3B)   | 0.9900     |
| C(4)-C(5)    | 1.5262(19) |
| C(4)-C(9)    | 1.5285(17) |
| C(4)-H(4A)   | 1.0000     |
| C(5)-C(6)    | 1.537(2)   |
| C(5)-H(5A)   | 0.9900     |
| C(5)-H(5B)   | 0.9900     |
| C(6)-C(7)    | 1.532(2)   |
| C(6)-H(6A)   | 0.9900     |
| C(6)-H(6B)   | 0.9900     |
| C(7)-C(18)   | 1.521(2)   |
| C(7)-C(8)    | 1.5435(19) |
| C(7)-H(7A)   | 1.0000     |
| C(8)-C(19)   | 1.5281(19) |
| C(8)-C(9)    | 1.5497(18) |
| C(8)-H(8A)   | 1.0000     |
| C(10)-C(11)  | 1.554(2)   |
| C(10)-H(10A) | 0.9900     |
| C(10)-H(10B) | 0.9900     |
| C(11)-C(12)  | 1.5127(18) |
| C(11)-H(11A) | 1.0000     |
| C(12)-C(13)  | 1.390(2)   |



|                  |            |
|------------------|------------|
| C(12)-C(17)      | 1.3953(19) |
| C(13)-C(14)      | 1.393(2)   |
| C(13)-H(13A)     | 0.9500     |
| C(14)-C(15)      | 1.385(3)   |
| C(14)-H(14A)     | 0.9500     |
| C(15)-C(16)      | 1.384(3)   |
| C(15)-H(15A)     | 0.9500     |
| C(16)-C(17)      | 1.393(2)   |
| C(16)-H(16A)     | 0.9500     |
| C(17)-H(17A)     | 0.9500     |
| C(18)-H(18A)     | 0.9800     |
| C(18)-H(18B)     | 0.9800     |
| C(18)-H(18C)     | 0.9800     |
| C(19)-H(19A)     | 0.9800     |
| C(19)-H(19B)     | 0.9800     |
| C(19)-H(19C)     | 0.9800     |
|                  |            |
| C(9)-O(2)-C(10)  | 105.74(9)  |
| C(1)-N(1)-C(9)   | 124.38(10) |
| C(1)-N(1)-C(11)  | 116.60(10) |
| C(9)-N(1)-C(11)  | 107.56(10) |
| O(1)-C(1)-N(1)   | 121.07(12) |
| O(1)-C(1)-C(2)   | 121.20(12) |
| N(1)-C(1)-C(2)   | 117.73(11) |
| C(1)-C(2)-C(3)   | 111.87(12) |
| C(1)-C(2)-H(2A)  | 109.2      |
| C(3)-C(2)-H(2A)  | 109.2      |
| C(1)-C(2)-H(2B)  | 109.2      |
| C(3)-C(2)-H(2B)  | 109.2      |
| H(2A)-C(2)-H(2B) | 107.9      |
| C(4)-C(3)-C(2)   | 107.61(11) |
| C(4)-C(3)-H(3A)  | 110.2      |
| C(2)-C(3)-H(3A)  | 110.2      |
| C(4)-C(3)-H(3B)  | 110.2      |
| C(2)-C(3)-H(3B)  | 110.2      |
| H(3A)-C(3)-H(3B) | 108.5      |

|                  |            |
|------------------|------------|
| C(3)-C(4)-C(5)   | 116.48(11) |
| C(3)-C(4)-C(9)   | 111.81(11) |
| C(5)-C(4)-C(9)   | 108.47(11) |
| C(3)-C(4)-H(4A)  | 106.5      |
| C(5)-C(4)-H(4A)  | 106.5      |
| C(9)-C(4)-H(4A)  | 106.5      |
| C(4)-C(5)-C(6)   | 109.19(11) |
| C(4)-C(5)-H(5A)  | 109.8      |
| C(6)-C(5)-H(5A)  | 109.8      |
| C(4)-C(5)-H(5B)  | 109.8      |
| C(6)-C(5)-H(5B)  | 109.8      |
| H(5A)-C(5)-H(5B) | 108.3      |
| C(7)-C(6)-C(5)   | 112.86(12) |
| C(7)-C(6)-H(6A)  | 109.0      |
| C(5)-C(6)-H(6A)  | 109.0      |
| C(7)-C(6)-H(6B)  | 109.0      |
| C(5)-C(6)-H(6B)  | 109.0      |
| H(6A)-C(6)-H(6B) | 107.8      |
| C(18)-C(7)-C(6)  | 110.90(12) |
| C(18)-C(7)-C(8)  | 112.38(12) |
| C(6)-C(7)-C(8)   | 112.00(12) |
| C(18)-C(7)-H(7A) | 107.1      |
| C(6)-C(7)-H(7A)  | 107.1      |
| C(8)-C(7)-H(7A)  | 107.1      |
| C(19)-C(8)-C(7)  | 114.47(11) |
| C(19)-C(8)-C(9)  | 112.42(11) |
| C(7)-C(8)-C(9)   | 107.90(11) |
| C(19)-C(8)-H(8A) | 107.2      |
| C(7)-C(8)-H(8A)  | 107.2      |
| C(9)-C(8)-H(8A)  | 107.2      |
| O(2)-C(9)-N(1)   | 101.86(9)  |
| O(2)-C(9)-C(4)   | 109.45(10) |
| N(1)-C(9)-C(4)   | 114.40(11) |
| O(2)-C(9)-C(8)   | 109.94(10) |
| N(1)-C(9)-C(8)   | 111.76(10) |
| C(4)-C(9)-C(8)   | 109.18(10) |

|                     |            |
|---------------------|------------|
| O(2)-C(10)-C(11)    | 106.02(10) |
| O(2)-C(10)-H(10A)   | 110.5      |
| C(11)-C(10)-H(10A)  | 110.5      |
| O(2)-C(10)-H(10B)   | 110.5      |
| C(11)-C(10)-H(10B)  | 110.5      |
| H(10A)-C(10)-H(10B) | 108.7      |
| N(1)-C(11)-C(12)    | 115.47(11) |
| N(1)-C(11)-C(10)    | 101.73(10) |
| C(12)-C(11)-C(10)   | 114.27(11) |
| N(1)-C(11)-H(11A)   | 108.3      |
| C(12)-C(11)-H(11A)  | 108.3      |
| C(10)-C(11)-H(11A)  | 108.3      |
| C(13)-C(12)-C(17)   | 118.89(13) |
| C(13)-C(12)-C(11)   | 121.72(12) |
| C(17)-C(12)-C(11)   | 119.34(13) |
| C(12)-C(13)-C(14)   | 120.72(15) |
| C(12)-C(13)-H(13A)  | 119.6      |
| C(14)-C(13)-H(13A)  | 119.6      |
| C(15)-C(14)-C(13)   | 119.76(17) |
| C(15)-C(14)-H(14A)  | 120.1      |
| C(13)-C(14)-H(14A)  | 120.1      |
| C(16)-C(15)-C(14)   | 120.22(15) |
| C(16)-C(15)-H(15A)  | 119.9      |
| C(14)-C(15)-H(15A)  | 119.9      |
| C(15)-C(16)-C(17)   | 119.95(16) |
| C(15)-C(16)-H(16A)  | 120.0      |
| C(17)-C(16)-H(16A)  | 120.0      |
| C(16)-C(17)-C(12)   | 120.44(17) |
| C(16)-C(17)-H(17A)  | 119.8      |
| C(12)-C(17)-H(17A)  | 119.8      |
| C(7)-C(18)-H(18A)   | 109.5      |
| C(7)-C(18)-H(18B)   | 109.5      |
| H(18A)-C(18)-H(18B) | 109.5      |
| C(7)-C(18)-H(18C)   | 109.5      |
| H(18A)-C(18)-H(18C) | 109.5      |
| H(18B)-C(18)-H(18C) | 109.5      |

|                     |       |
|---------------------|-------|
| C(8)-C(19)-H(19A)   | 109.5 |
| C(8)-C(19)-H(19B)   | 109.5 |
| H(19A)-C(19)-H(19B) | 109.5 |
| C(8)-C(19)-H(19C)   | 109.5 |
| H(19A)-C(19)-H(19C) | 109.5 |
| H(19B)-C(19)-H(19C) | 109.5 |

---

Symmetry transformations used to generate equivalent atoms:

Table 4. Anisotropic displacement parameters ( $\text{\AA}^2 \times 10^3$ ) for D59ZB2\_0m\_a. The anisotropic displacement factor exponent takes the form:  $-2\pi^2 [ h^2 a^{*2} U^{11} + \dots + 2 h k a^* b^* U^{12} ]$

|       | U <sup>11</sup> | U <sup>22</sup> | U <sup>33</sup> | U <sup>23</sup> | U <sup>13</sup> | U <sup>12</sup> |
|-------|-----------------|-----------------|-----------------|-----------------|-----------------|-----------------|
| O(1)  | 20(1)           | 21(1)           | 22(1)           | 4(1)            | 1(1)            | 3(1)            |
| O(2)  | 24(1)           | 14(1)           | 18(1)           | 2(1)            | -4(1)           | -5(1)           |
| N(1)  | 16(1)           | 15(1)           | 13(1)           | 0(1)            | -1(1)           | 0(1)            |
| C(1)  | 17(1)           | 14(1)           | 18(1)           | 2(1)            | 3(1)            | -2(1)           |
| C(2)  | 26(1)           | 22(1)           | 18(1)           | -1(1)           | 4(1)            | 3(1)            |
| C(3)  | 23(1)           | 26(1)           | 16(1)           | 2(1)            | 4(1)            | 0(1)            |
| C(4)  | 20(1)           | 19(1)           | 12(1)           | 1(1)            | 0(1)            | -2(1)           |
| C(5)  | 27(1)           | 24(1)           | 16(1)           | 5(1)            | -2(1)           | 0(1)            |
| C(6)  | 28(1)           | 26(1)           | 22(1)           | 3(1)            | -5(1)           | 4(1)            |
| C(7)  | 24(1)           | 21(1)           | 23(1)           | 2(1)            | -2(1)           | 4(1)            |
| C(8)  | 17(1)           | 15(1)           | 16(1)           | 0(1)            | -1(1)           | 0(1)            |
| C(9)  | 17(1)           | 12(1)           | 14(1)           | 0(1)            | -1(1)           | -2(1)           |
| C(10) | 27(1)           | 15(1)           | 18(1)           | -2(1)           | -4(1)           | -4(1)           |
| C(11) | 18(1)           | 15(1)           | 14(1)           | -1(1)           | -2(1)           | -2(1)           |
| C(12) | 17(1)           | 21(1)           | 14(1)           | 0(1)            | -2(1)           | 2(1)            |
| C(13) | 30(1)           | 23(1)           | 18(1)           | 1(1)            | 2(1)            | -2(1)           |
| C(14) | 34(1)           | 39(1)           | 25(1)           | 10(1)           | 4(1)            | -7(1)           |
| C(15) | 30(1)           | 58(1)           | 18(1)           | 8(1)            | 5(1)            | 3(1)            |
| C(16) | 36(1)           | 49(1)           | 15(1)           | -6(1)           | 0(1)            | 7(1)            |
| C(17) | 28(1)           | 30(1)           | 18(1)           | -6(1)           | -3(1)           | 1(1)            |
| C(18) | 23(1)           | 33(1)           | 28(1)           | -2(1)           | -1(1)           | 9(1)            |
| C(19) | 19(1)           | 18(1)           | 29(1)           | 1(1)            | 1(1)            | -3(1)           |

Table 5. Hydrogen coordinates ( $\times 10^4$ ) and isotropic displacement parameters ( $\text{\AA}^2 \times 10^{-3}$ ) for D59ZB2\_0m\_a.

|        | x     | y    | z    | U(eq) |
|--------|-------|------|------|-------|
| H(2A)  | 9136  | 1342 | 1106 | 26    |
| H(2B)  | 11033 | 2109 | 1065 | 26    |
| H(3A)  | 10118 | 5641 | 820  | 26    |
| H(3B)  | 9262  | 4119 | 117  | 26    |
| H(4A)  | 6887  | 3788 | 925  | 20    |
| H(5A)  | 6696  | 6545 | -92  | 27    |
| H(5B)  | 7313  | 8193 | 620  | 27    |
| H(6A)  | 4364  | 8252 | 513  | 31    |
| H(6B)  | 4285  | 5745 | 620  | 31    |
| H(7A)  | 5368  | 8683 | 1894 | 27    |
| H(8A)  | 5910  | 6007 | 2837 | 19    |
| H(10A) | 7903  | 8349 | 3256 | 24    |
| H(10B) | 9821  | 8713 | 3044 | 24    |
| H(11A) | 10499 | 5379 | 3332 | 19    |
| H(13A) | 7611  | 1934 | 3595 | 28    |
| H(14A) | 6364  | 926  | 4821 | 39    |
| H(15A) | 6470  | 3181 | 5977 | 42    |
| H(16A) | 7847  | 6415 | 5917 | 40    |
| H(17A) | 9071  | 7442 | 4686 | 31    |
| H(18A) | 2449  | 8540 | 1677 | 42    |
| H(18B) | 3014  | 7718 | 2595 | 42    |
| H(18C) | 2477  | 6065 | 1874 | 42    |
| H(19A) | 4627  | 3111 | 1610 | 33    |
| H(19B) | 4149  | 3302 | 2565 | 33    |
| H(19C) | 5913  | 2324 | 2345 | 33    |

- C(4) - C(3) C(5) C(9) H(4A) sp3 S
- C(7) - C(6) C(8) C(18) H(7A) sp3 R
- C(8) - C(7) C(9) C(19) H(8A) sp3 R
- C(9) - O(2) N(1) C(4) C(8) sp3 R
- C(11) - N(1) C(10) C(12) H(11A) sp3 R

Crystallographic data for compound **8a**:

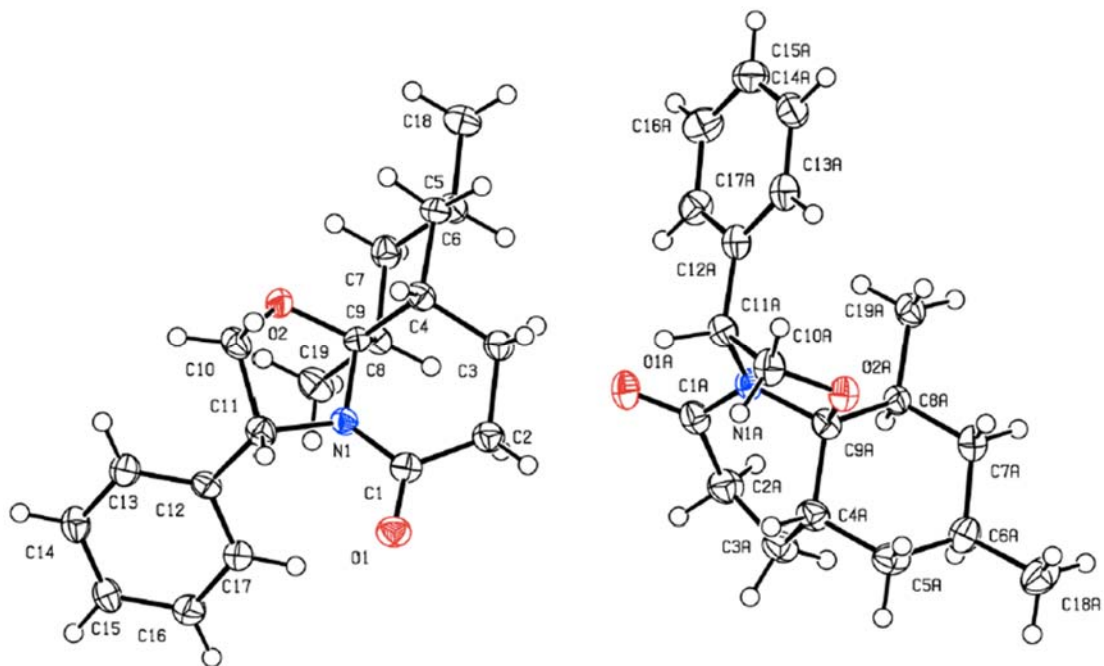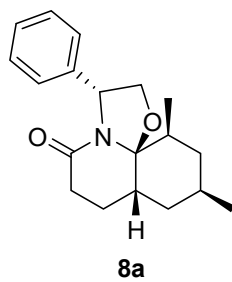



Table 1. Crystal data and structure refinement for **8a** (D59YB89\_0m\_a).

|                                   |                                                  |                 |
|-----------------------------------|--------------------------------------------------|-----------------|
| Identification code               | D59YB89_0m_a                                     |                 |
| Empirical formula                 | C <sub>19</sub> H <sub>25</sub> N O <sub>2</sub> |                 |
| Formula weight                    | 299.40                                           |                 |
| Temperature                       | 100(2) K                                         |                 |
| Wavelength                        | 0.71073 Å                                        |                 |
| Crystal system                    | Monoclinic                                       |                 |
| Space group                       | P 21                                             |                 |
| Unit cell dimensions              | a = 13.0323(13) Å                                | α = 90°.        |
|                                   | b = 7.7488(6) Å                                  | β = 95.606(4)°. |
|                                   | c = 16.1799(16) Å                                | γ = 90°.        |
| Volume                            | 1626.1(3) Å <sup>3</sup>                         |                 |
| Z                                 | 4                                                |                 |
| Density (calculated)              | 1.223 Mg/m <sup>3</sup>                          |                 |
| Absorption coefficient            | 0.078 mm <sup>-1</sup>                           |                 |
| F(000)                            | 648                                              |                 |
| Crystal size                      | 0.09 x 0.06 x 0.03 mm <sup>3</sup>               |                 |
| Theta range for data collection   | 2.110 to 30.609°.                                |                 |
| Index ranges                      | -18 ≤ h ≤ 18, -11 ≤ k ≤ 11, -23 ≤ l ≤ 23         |                 |
| Reflections collected             | 37613                                            |                 |
| Independent reflections           | 9872 [R(int) = 0.1209]                           |                 |
| Completeness to theta = 25.242°   | 99.9 %                                           |                 |
| Absorption correction             | Semi-empirical from equivalents                  |                 |
| Max. and min. transmission        | 0.7461 and 0.6649                                |                 |
| Refinement method                 | Full-matrix least-squares on F <sup>2</sup>      |                 |
| Data / restraints / parameters    | 9872 / 1 / 402                                   |                 |
| Goodness-of-fit on F <sup>2</sup> | 1.071                                            |                 |
| Final R indices [I > 2σ(I)]       | R1 = 0.0597, wR2 = 0.0967                        |                 |
| R indices (all data)              | R1 = 0.1655, wR2 = 0.1403                        |                 |
| Absolute structure parameter      | -2.0(9)                                          |                 |
| Extinction coefficient            | 0.0196(17)                                       |                 |
| Largest diff. peak and hole       | 0.358 and -0.345 e.Å <sup>-3</sup>               |                 |

Table 2. Atomic coordinates ( $\times 10^4$ ) and equivalent isotropic displacement parameters ( $\text{\AA}^2 \times 10^3$ ) for D59YB89\_0m\_a.  $U(\text{eq})$  is defined as one third of the trace of the orthogonalized  $U^{ij}$  tensor.

|       | x       | y        | z       | $U(\text{eq})$ |
|-------|---------|----------|---------|----------------|
| O(1)  | 4086(2) | 4409(4)  | 5417(2) | 30(1)          |
| O(2)  | 860(2)  | 3586(3)  | 4232(2) | 24(1)          |
| N(1)  | 2580(2) | 3767(4)  | 4663(2) | 22(1)          |
| C(1)  | 3509(3) | 4570(5)  | 4769(2) | 26(1)          |
| C(2)  | 3787(3) | 5584(6)  | 4040(2) | 29(1)          |
| C(3)  | 2897(3) | 6669(5)  | 3610(3) | 27(1)          |
| C(4)  | 1809(3) | 6042(5)  | 3746(2) | 24(1)          |
| C(5)  | 1021(3) | 6470(5)  | 3004(2) | 25(1)          |
| C(6)  | 1135(3) | 5357(5)  | 2242(2) | 26(1)          |
| C(7)  | 1118(3) | 3456(5)  | 2485(2) | 28(1)          |
| C(8)  | 1973(3) | 3023(5)  | 3174(2) | 24(1)          |
| C(9)  | 1813(3) | 4120(5)  | 3940(2) | 22(1)          |
| C(10) | 971(3)  | 3675(6)  | 5123(2) | 28(1)          |
| C(11) | 2081(3) | 3094(5)  | 5374(2) | 25(1)          |
| C(12) | 2260(3) | 1178(5)  | 5550(2) | 23(1)          |
| C(13) | 1511(3) | 128(5)   | 5835(2) | 28(1)          |
| C(14) | 1727(3) | -1558(5) | 6072(3) | 29(1)          |
| C(15) | 2703(3) | -2227(5) | 6027(2) | 28(1)          |
| C(16) | 3450(3) | -1206(5) | 5723(3) | 31(1)          |
| C(17) | 3229(3) | 488(6)   | 5487(2) | 29(1)          |
| C(18) | 292(3)  | 5762(6)  | 1538(3) | 37(1)          |
| C(19) | 2011(4) | 1089(5)  | 3353(3) | 32(1)          |
| O(1A) | 4312(2) | 5645(4)  | 2072(2) | 32(1)          |
| O(2A) | 5916(2) | 10764(4) | 2099(2) | 27(1)          |
| N(1A) | 5139(3) | 8155(4)  | 1823(2) | 24(1)          |
| C(1A) | 5102(3) | 6401(5)  | 1900(2) | 27(1)          |
| C(2A) | 6056(3) | 5445(6)  | 1713(3) | 35(1)          |
| C(3A) | 7075(3) | 6295(5)  | 2041(3) | 32(1)          |
| C(4A) | 6976(3) | 8179(5)  | 2301(2) | 28(1)          |
| C(5A) | 7994(3) | 9184(6)  | 2293(3) | 33(1)          |
| C(6A) | 8287(3) | 9555(6)  | 1419(3) | 33(1)          |

|        |         |          |         |       |
|--------|---------|----------|---------|-------|
| C(7A)  | 7385(3) | 10403(6) | 903(3)  | 31(1) |
| C(8A)  | 6386(3) | 9377(6)  | 873(2)  | 24(1) |
| C(9A)  | 6116(3) | 9098(5)  | 1765(2) | 23(1) |
| C(10A) | 5090(3) | 10590(6) | 2620(2) | 30(1) |
| C(11A) | 4371(3) | 9273(5)  | 2174(2) | 26(1) |
| C(12A) | 3542(3) | 9937(5)  | 1535(2) | 26(1) |
| C(13A) | 3361(4) | 11672(5) | 1373(3) | 30(1) |
| C(14A) | 2559(3) | 12195(6) | 797(3)  | 34(1) |
| C(15A) | 1914(4) | 11004(6) | 382(3)  | 36(1) |
| C(16A) | 2084(4) | 9264(6)  | 528(3)  | 38(1) |
| C(17A) | 2888(3) | 8742(6)  | 1100(3) | 32(1) |
| C(18A) | 9260(3) | 10634(6) | 1444(3) | 43(1) |
| C(19A) | 5530(3) | 10217(6) | 305(2)  | 31(1) |

---

Table 3. Bond lengths [Å] and angles [°] for D59YB89\_0m\_a.

---

|              |          |
|--------------|----------|
| O(1)-C(1)    | 1.235(5) |
| O(2)-C(9)    | 1.432(4) |
| O(2)-C(10)   | 1.436(4) |
| N(1)-C(1)    | 1.358(5) |
| N(1)-C(11)   | 1.472(5) |
| N(1)-C(9)    | 1.487(5) |
| C(1)-C(2)    | 1.491(5) |
| C(2)-C(3)    | 1.542(6) |
| C(2)-H(2A)   | 0.9900   |
| C(2)-H(2AB)  | 0.9900   |
| C(3)-C(4)    | 1.535(5) |
| C(3)-H(3A)   | 0.9900   |
| C(3)-H(3AB)  | 0.9900   |
| C(4)-C(9)    | 1.522(5) |
| C(4)-C(5)    | 1.538(5) |
| C(4)-H(4)    | 1.0000   |
| C(5)-C(6)    | 1.524(5) |
| C(5)-H(5A)   | 0.9900   |
| C(5)-H(5AB)  | 0.9900   |
| C(6)-C(7)    | 1.526(5) |
| C(6)-C(18)   | 1.536(5) |
| C(6)-H(6)    | 1.0000   |
| C(7)-C(8)    | 1.534(5) |
| C(7)-H(7A)   | 0.9900   |
| C(7)-H(7AB)  | 0.9900   |
| C(8)-C(19)   | 1.526(5) |
| C(8)-C(9)    | 1.533(5) |
| C(8)-H(8)    | 1.0000   |
| C(10)-C(11)  | 1.531(5) |
| C(10)-H(10A) | 0.9900   |
| C(10)-H(10B) | 0.9900   |
| C(11)-C(12)  | 1.525(5) |
| C(11)-H(11)  | 1.0000   |
| C(12)-C(13)  | 1.384(5) |

|              |          |
|--------------|----------|
| C(12)-C(17)  | 1.385(5) |
| C(13)-C(14)  | 1.382(6) |
| C(13)-H(13)  | 0.9500   |
| C(14)-C(15)  | 1.382(6) |
| C(14)-H(14)  | 0.9500   |
| C(15)-C(16)  | 1.381(5) |
| C(15)-H(15)  | 0.9500   |
| C(16)-C(17)  | 1.389(6) |
| C(16)-H(16)  | 0.9500   |
| C(17)-H(17)  | 0.9500   |
| C(18)-H(18A) | 0.9800   |
| C(18)-H(18B) | 0.9800   |
| C(18)-H(18C) | 0.9800   |
| C(19)-H(19A) | 0.9800   |
| C(19)-H(19B) | 0.9800   |
| C(19)-H(19C) | 0.9800   |
| O(1A)-C(1A)  | 1.241(5) |
| O(2A)-C(9A)  | 1.433(5) |
| O(2A)-C(10A) | 1.436(4) |
| N(1A)-C(1A)  | 1.366(5) |
| N(1A)-C(11A) | 1.478(5) |
| N(1A)-C(9A)  | 1.478(5) |
| C(1A)-C(2A)  | 1.502(6) |
| C(2A)-C(3A)  | 1.530(6) |
| C(2A)-H(2AA) | 0.9900   |
| C(2A)-H(2AC) | 0.9900   |
| C(3A)-C(4A)  | 1.528(6) |
| C(3A)-H(3AA) | 0.9900   |
| C(3A)-H(3AC) | 0.9900   |
| C(4A)-C(9A)  | 1.526(5) |
| C(4A)-C(5A)  | 1.539(6) |
| C(4A)-H(4A)  | 1.0000   |
| C(5A)-C(6A)  | 1.528(6) |
| C(5A)-H(5AA) | 0.9900   |
| C(5A)-H(5AC) | 0.9900   |
| C(6A)-C(18A) | 1.516(6) |

|                 |          |
|-----------------|----------|
| C(6A)-C(7A)     | 1.523(6) |
| C(6A)-H(6A)     | 1.0000   |
| C(7A)-C(8A)     | 1.522(5) |
| C(7A)-H(7AA)    | 0.9900   |
| C(7A)-H(7AC)    | 0.9900   |
| C(8A)-C(19A)    | 1.521(6) |
| C(8A)-C(9A)     | 1.534(5) |
| C(8A)-H(8A)     | 1.0000   |
| C(10A)-C(11A)   | 1.520(6) |
| C(10A)-H(10C)   | 0.9900   |
| C(10A)-H(10D)   | 0.9900   |
| C(11A)-C(12A)   | 1.510(6) |
| C(11A)-H(11A)   | 1.0000   |
| C(12A)-C(13A)   | 1.386(6) |
| C(12A)-C(17A)   | 1.401(6) |
| C(13A)-C(14A)   | 1.390(6) |
| C(13A)-H(13A)   | 0.9500   |
| C(14A)-C(15A)   | 1.378(6) |
| C(14A)-H(14A)   | 0.9500   |
| C(15A)-C(16A)   | 1.383(6) |
| C(15A)-H(15A)   | 0.9500   |
| C(16A)-C(17A)   | 1.389(6) |
| C(16A)-H(16A)   | 0.9500   |
| C(17A)-H(17A)   | 0.9500   |
| C(18A)-H(18D)   | 0.9800   |
| C(18A)-H(18E)   | 0.9800   |
| C(18A)-H(18F)   | 0.9800   |
| C(19A)-H(19D)   | 0.9800   |
| C(19A)-H(19E)   | 0.9800   |
| C(19A)-H(19F)   | 0.9800   |
|                 |          |
| C(9)-O(2)-C(10) | 108.2(3) |
| C(1)-N(1)-C(11) | 121.3(3) |
| C(1)-N(1)-C(9)  | 122.5(3) |
| C(11)-N(1)-C(9) | 111.5(3) |
| O(1)-C(1)-N(1)  | 121.5(4) |

|                   |          |
|-------------------|----------|
| O(1)-C(1)-C(2)    | 123.4(4) |
| N(1)-C(1)-C(2)    | 115.0(3) |
| C(1)-C(2)-C(3)    | 114.5(3) |
| C(1)-C(2)-H(2A)   | 108.6    |
| C(3)-C(2)-H(2A)   | 108.6    |
| C(1)-C(2)-H(2AB)  | 108.6    |
| C(3)-C(2)-H(2AB)  | 108.6    |
| H(2A)-C(2)-H(2AB) | 107.6    |
| C(4)-C(3)-C(2)    | 115.3(3) |
| C(4)-C(3)-H(3A)   | 108.5    |
| C(2)-C(3)-H(3A)   | 108.5    |
| C(4)-C(3)-H(3AB)  | 108.5    |
| C(2)-C(3)-H(3AB)  | 108.5    |
| H(3A)-C(3)-H(3AB) | 107.5    |
| C(9)-C(4)-C(3)    | 110.8(3) |
| C(9)-C(4)-C(5)    | 111.1(3) |
| C(3)-C(4)-C(5)    | 112.0(3) |
| C(9)-C(4)-H(4)    | 107.6    |
| C(3)-C(4)-H(4)    | 107.6    |
| C(5)-C(4)-H(4)    | 107.6    |
| C(6)-C(5)-C(4)    | 113.5(3) |
| C(6)-C(5)-H(5A)   | 108.9    |
| C(4)-C(5)-H(5A)   | 108.9    |
| C(6)-C(5)-H(5AB)  | 108.9    |
| C(4)-C(5)-H(5AB)  | 108.9    |
| H(5A)-C(5)-H(5AB) | 107.7    |
| C(5)-C(6)-C(7)    | 109.4(3) |
| C(5)-C(6)-C(18)   | 111.4(3) |
| C(7)-C(6)-C(18)   | 111.2(3) |
| C(5)-C(6)-H(6)    | 108.2    |
| C(7)-C(6)-H(6)    | 108.2    |
| C(18)-C(6)-H(6)   | 108.2    |
| C(6)-C(7)-C(8)    | 111.8(3) |
| C(6)-C(7)-H(7A)   | 109.3    |
| C(8)-C(7)-H(7A)   | 109.3    |
| C(6)-C(7)-H(7AB)  | 109.3    |

|                     |          |
|---------------------|----------|
| C(8)-C(7)-H(7AB)    | 109.3    |
| H(7A)-C(7)-H(7AB)   | 107.9    |
| C(19)-C(8)-C(9)     | 113.3(3) |
| C(19)-C(8)-C(7)     | 111.1(3) |
| C(9)-C(8)-C(7)      | 108.6(3) |
| C(19)-C(8)-H(8)     | 107.9    |
| C(9)-C(8)-H(8)      | 107.9    |
| C(7)-C(8)-H(8)      | 107.9    |
| O(2)-C(9)-N(1)      | 103.0(3) |
| O(2)-C(9)-C(4)      | 111.4(3) |
| N(1)-C(9)-C(4)      | 109.3(3) |
| O(2)-C(9)-C(8)      | 107.3(3) |
| N(1)-C(9)-C(8)      | 113.5(3) |
| C(4)-C(9)-C(8)      | 112.0(3) |
| O(2)-C(10)-C(11)    | 104.6(3) |
| O(2)-C(10)-H(10A)   | 110.8    |
| C(11)-C(10)-H(10A)  | 110.8    |
| O(2)-C(10)-H(10B)   | 110.8    |
| C(11)-C(10)-H(10B)  | 110.8    |
| H(10A)-C(10)-H(10B) | 108.9    |
| N(1)-C(11)-C(12)    | 114.8(3) |
| N(1)-C(11)-C(10)    | 99.6(3)  |
| C(12)-C(11)-C(10)   | 117.4(4) |
| N(1)-C(11)-H(11)    | 108.2    |
| C(12)-C(11)-H(11)   | 108.2    |
| C(10)-C(11)-H(11)   | 108.2    |
| C(13)-C(12)-C(17)   | 118.4(4) |
| C(13)-C(12)-C(11)   | 122.3(4) |
| C(17)-C(12)-C(11)   | 119.1(4) |
| C(14)-C(13)-C(12)   | 121.1(4) |
| C(14)-C(13)-H(13)   | 119.5    |
| C(12)-C(13)-H(13)   | 119.5    |
| C(13)-C(14)-C(15)   | 120.3(4) |
| C(13)-C(14)-H(14)   | 119.9    |
| C(15)-C(14)-H(14)   | 119.9    |
| C(16)-C(15)-C(14)   | 119.2(4) |



|                     |          |
|---------------------|----------|
| C(16)-C(15)-H(15)   | 120.4    |
| C(14)-C(15)-H(15)   | 120.4    |
| C(15)-C(16)-C(17)   | 120.3(4) |
| C(15)-C(16)-H(16)   | 119.9    |
| C(17)-C(16)-H(16)   | 119.9    |
| C(12)-C(17)-C(16)   | 120.7(4) |
| C(12)-C(17)-H(17)   | 119.7    |
| C(16)-C(17)-H(17)   | 119.7    |
| C(6)-C(18)-H(18A)   | 109.5    |
| C(6)-C(18)-H(18B)   | 109.5    |
| H(18A)-C(18)-H(18B) | 109.5    |
| C(6)-C(18)-H(18C)   | 109.5    |
| H(18A)-C(18)-H(18C) | 109.5    |
| H(18B)-C(18)-H(18C) | 109.5    |
| C(8)-C(19)-H(19A)   | 109.5    |
| C(8)-C(19)-H(19B)   | 109.5    |
| H(19A)-C(19)-H(19B) | 109.5    |
| C(8)-C(19)-H(19C)   | 109.5    |
| H(19A)-C(19)-H(19C) | 109.5    |
| H(19B)-C(19)-H(19C) | 109.5    |
| C(9A)-O(2A)-C(10A)  | 108.1(3) |
| C(1A)-N(1A)-C(11A)  | 121.1(3) |
| C(1A)-N(1A)-C(9A)   | 122.4(4) |
| C(11A)-N(1A)-C(9A)  | 110.7(3) |
| O(1A)-C(1A)-N(1A)   | 121.9(4) |
| O(1A)-C(1A)-C(2A)   | 122.2(4) |
| N(1A)-C(1A)-C(2A)   | 115.8(4) |
| C(1A)-C(2A)-C(3A)   | 115.2(4) |
| C(1A)-C(2A)-H(2AA)  | 108.5    |
| C(3A)-C(2A)-H(2AA)  | 108.5    |
| C(1A)-C(2A)-H(2AC)  | 108.5    |
| C(3A)-C(2A)-H(2AC)  | 108.5    |
| H(2AA)-C(2A)-H(2AC) | 107.5    |
| C(4A)-C(3A)-C(2A)   | 114.4(4) |
| C(4A)-C(3A)-H(3AA)  | 108.7    |
| C(2A)-C(3A)-H(3AA)  | 108.7    |

|                     |          |
|---------------------|----------|
| C(4A)-C(3A)-H(3AC)  | 108.7    |
| C(2A)-C(3A)-H(3AC)  | 108.7    |
| H(3AA)-C(3A)-H(3AC) | 107.6    |
| C(9A)-C(4A)-C(3A)   | 111.5(3) |
| C(9A)-C(4A)-C(5A)   | 110.2(3) |
| C(3A)-C(4A)-C(5A)   | 112.6(4) |
| C(9A)-C(4A)-H(4A)   | 107.4    |
| C(3A)-C(4A)-H(4A)   | 107.4    |
| C(5A)-C(4A)-H(4A)   | 107.4    |
| C(6A)-C(5A)-C(4A)   | 113.4(3) |
| C(6A)-C(5A)-H(5AA)  | 108.9    |
| C(4A)-C(5A)-H(5AA)  | 108.9    |
| C(6A)-C(5A)-H(5AC)  | 108.9    |
| C(4A)-C(5A)-H(5AC)  | 108.9    |
| H(5AA)-C(5A)-H(5AC) | 107.7    |
| C(18A)-C(6A)-C(7A)  | 112.0(4) |
| C(18A)-C(6A)-C(5A)  | 111.3(4) |
| C(7A)-C(6A)-C(5A)   | 109.9(3) |
| C(18A)-C(6A)-H(6A)  | 107.8    |
| C(7A)-C(6A)-H(6A)   | 107.8    |
| C(5A)-C(6A)-H(6A)   | 107.8    |
| C(8A)-C(7A)-C(6A)   | 113.8(4) |
| C(8A)-C(7A)-H(7AA)  | 108.8    |
| C(6A)-C(7A)-H(7AA)  | 108.8    |
| C(8A)-C(7A)-H(7AC)  | 108.8    |
| C(6A)-C(7A)-H(7AC)  | 108.8    |
| H(7AA)-C(7A)-H(7AC) | 107.7    |
| C(19A)-C(8A)-C(7A)  | 111.7(3) |
| C(19A)-C(8A)-C(9A)  | 114.0(3) |
| C(7A)-C(8A)-C(9A)   | 108.6(3) |
| C(19A)-C(8A)-H(8A)  | 107.4    |
| C(7A)-C(8A)-H(8A)   | 107.4    |
| C(9A)-C(8A)-H(8A)   | 107.4    |
| O(2A)-C(9A)-N(1A)   | 103.4(3) |
| O(2A)-C(9A)-C(4A)   | 110.9(3) |
| N(1A)-C(9A)-C(4A)   | 108.8(3) |

|                      |          |
|----------------------|----------|
| O(2A)-C(9A)-C(8A)    | 107.2(3) |
| N(1A)-C(9A)-C(8A)    | 114.0(3) |
| C(4A)-C(9A)-C(8A)    | 112.2(3) |
| O(2A)-C(10A)-C(11A)  | 104.3(3) |
| O(2A)-C(10A)-H(10C)  | 110.9    |
| C(11A)-C(10A)-H(10C) | 110.9    |
| O(2A)-C(10A)-H(10D)  | 110.9    |
| C(11A)-C(10A)-H(10D) | 110.9    |
| H(10C)-C(10A)-H(10D) | 108.9    |
| N(1A)-C(11A)-C(12A)  | 113.8(3) |
| N(1A)-C(11A)-C(10A)  | 99.6(3)  |
| C(12A)-C(11A)-C(10A) | 117.5(4) |
| N(1A)-C(11A)-H(11A)  | 108.5    |
| C(12A)-C(11A)-H(11A) | 108.5    |
| C(10A)-C(11A)-H(11A) | 108.5    |
| C(13A)-C(12A)-C(17A) | 117.5(4) |
| C(13A)-C(12A)-C(11A) | 123.9(4) |
| C(17A)-C(12A)-C(11A) | 118.5(4) |
| C(12A)-C(13A)-C(14A) | 120.8(4) |
| C(12A)-C(13A)-H(13A) | 119.6    |
| C(14A)-C(13A)-H(13A) | 119.6    |
| C(15A)-C(14A)-C(13A) | 121.0(4) |
| C(15A)-C(14A)-H(14A) | 119.5    |
| C(13A)-C(14A)-H(14A) | 119.5    |
| C(14A)-C(15A)-C(16A) | 119.3(4) |
| C(14A)-C(15A)-H(15A) | 120.4    |
| C(16A)-C(15A)-H(15A) | 120.4    |
| C(15A)-C(16A)-C(17A) | 119.7(5) |
| C(15A)-C(16A)-H(16A) | 120.2    |
| C(17A)-C(16A)-H(16A) | 120.2    |
| C(16A)-C(17A)-C(12A) | 121.7(4) |
| C(16A)-C(17A)-H(17A) | 119.2    |
| C(12A)-C(17A)-H(17A) | 119.2    |
| C(6A)-C(18A)-H(18D)  | 109.5    |
| C(6A)-C(18A)-H(18E)  | 109.5    |
| H(18D)-C(18A)-H(18E) | 109.5    |

|                      |       |
|----------------------|-------|
| C(6A)-C(18A)-H(18F)  | 109.5 |
| H(18D)-C(18A)-H(18F) | 109.5 |
| H(18E)-C(18A)-H(18F) | 109.5 |
| C(8A)-C(19A)-H(19D)  | 109.5 |
| C(8A)-C(19A)-H(19E)  | 109.5 |
| H(19D)-C(19A)-H(19E) | 109.5 |
| C(8A)-C(19A)-H(19F)  | 109.5 |
| H(19D)-C(19A)-H(19F) | 109.5 |
| H(19E)-C(19A)-H(19F) | 109.5 |

---

Symmetry transformations used to generate equivalent atoms:

Table 4. Anisotropic displacement parameters ( $\text{\AA}^2 \times 10^3$ ) for D59YB89\_0m\_a. The anisotropic displacement factor exponent takes the form:  $-2\pi^2 [ h^2 a^{*2} U^{11} + \dots + 2 h k a^* b^* U^{12} ]$

|       | U <sup>11</sup> | U <sup>22</sup> | U <sup>33</sup> | U <sup>23</sup> | U <sup>13</sup> | U <sup>12</sup> |
|-------|-----------------|-----------------|-----------------|-----------------|-----------------|-----------------|
| O(1)  | 29(2)           | 32(2)           | 29(2)           | 0(1)            | -5(1)           | -1(1)           |
| O(2)  | 22(2)           | 29(2)           | 22(1)           | 3(1)            | 2(1)            | -2(1)           |
| N(1)  | 22(2)           | 23(2)           | 20(2)           | 2(1)            | -1(1)           | -2(1)           |
| C(1)  | 27(2)           | 23(2)           | 26(2)           | -3(2)           | 0(2)            | 0(2)            |
| C(2)  | 28(2)           | 28(2)           | 30(2)           | 2(2)            | -1(2)           | -2(2)           |
| C(3)  | 27(2)           | 21(2)           | 31(2)           | 1(2)            | 0(2)            | -2(2)           |
| C(4)  | 27(2)           | 22(2)           | 21(2)           | 0(2)            | 0(2)            | 0(2)            |
| C(5)  | 23(2)           | 25(2)           | 26(2)           | 3(2)            | -1(2)           | 3(2)            |
| C(6)  | 28(2)           | 26(2)           | 25(2)           | 4(2)            | 0(2)            | -2(2)           |
| C(7)  | 31(2)           | 29(2)           | 24(2)           | 0(2)            | 3(2)            | -3(2)           |
| C(8)  | 28(2)           | 21(2)           | 22(2)           | 1(2)            | 2(2)            | 1(2)            |
| C(9)  | 19(2)           | 25(2)           | 22(2)           | 3(2)            | 0(2)            | -1(2)           |
| C(10) | 35(3)           | 30(2)           | 21(2)           | 5(2)            | 6(2)            | 3(2)            |
| C(11) | 29(2)           | 28(2)           | 19(2)           | 1(2)            | 5(2)            | 1(2)            |
| C(12) | 26(2)           | 24(2)           | 19(2)           | 1(2)            | -1(2)           | 1(2)            |
| C(13) | 28(2)           | 27(2)           | 28(2)           | -1(2)           | 4(2)            | -2(2)           |
| C(14) | 33(3)           | 23(2)           | 31(2)           | 0(2)            | 8(2)            | -3(2)           |
| C(15) | 36(3)           | 19(2)           | 29(2)           | 1(2)            | 5(2)            | -2(2)           |
| C(16) | 28(2)           | 28(2)           | 37(2)           | 4(2)            | 2(2)            | 2(2)            |
| C(17) | 25(2)           | 29(2)           | 34(2)           | 6(2)            | 1(2)            | -2(2)           |
| C(18) | 36(3)           | 43(3)           | 30(2)           | 6(2)            | -5(2)           | 2(2)            |
| C(19) | 43(3)           | 23(2)           | 29(2)           | -1(2)           | 0(2)            | 1(2)            |
| O(1A) | 38(2)           | 25(2)           | 32(2)           | 0(1)            | 7(1)            | -9(1)           |
| O(2A) | 31(2)           | 26(2)           | 26(1)           | -4(1)           | 5(1)            | -5(1)           |
| N(1A) | 27(2)           | 22(2)           | 23(2)           | 0(1)            | 3(2)            | -4(1)           |
| C(1A) | 34(3)           | 26(2)           | 21(2)           | 0(2)            | 0(2)            | -5(2)           |
| C(2A) | 36(3)           | 26(3)           | 43(3)           | 0(2)            | -1(2)           | 0(2)            |
| C(3A) | 36(3)           | 29(2)           | 30(2)           | 0(2)            | -6(2)           | -1(2)           |
| C(4A) | 31(3)           | 32(2)           | 21(2)           | 0(2)            | -4(2)           | -1(2)           |
| C(5A) | 33(3)           | 32(3)           | 31(2)           | -4(2)           | -7(2)           | -1(2)           |
| C(6A) | 30(3)           | 32(3)           | 36(2)           | -3(2)           | 3(2)            | -6(2)           |

|        |       |       |       |       |       |       |
|--------|-------|-------|-------|-------|-------|-------|
| C(7A)  | 33(3) | 31(2) | 29(2) | 1(2)  | 7(2)  | -5(2) |
| C(8A)  | 24(2) | 28(2) | 21(2) | 4(2)  | 2(2)  | -2(2) |
| C(9A)  | 29(2) | 16(2) | 24(2) | -3(2) | 1(2)  | -2(2) |
| C(10A) | 37(3) | 33(2) | 21(2) | -5(2) | 6(2)  | -4(2) |
| C(11A) | 31(2) | 25(2) | 21(2) | -1(2) | 5(2)  | 0(2)  |
| C(12A) | 31(3) | 25(2) | 24(2) | -3(2) | 7(2)  | -3(2) |
| C(13A) | 35(3) | 27(2) | 28(2) | -3(2) | 9(2)  | -3(2) |
| C(14A) | 37(3) | 33(3) | 35(3) | 7(2)  | 10(2) | 5(2)  |
| C(15A) | 32(3) | 45(3) | 31(2) | 2(2)  | 3(2)  | 5(2)  |
| C(16A) | 35(3) | 43(3) | 35(3) | -9(2) | -1(2) | 0(2)  |
| C(17A) | 32(3) | 28(2) | 36(2) | -4(2) | 3(2)  | -3(2) |
| C(18A) | 31(3) | 41(3) | 57(3) | -5(3) | 2(2)  | -5(2) |
| C(19A) | 33(3) | 37(3) | 23(2) | 4(2)  | 3(2)  | -4(2) |

---

Table 5. Hydrogen coordinates ( $\times 10^4$ ) and isotropic displacement parameters ( $\text{\AA}^2 \times 10^{-3}$ ) for D59YB89\_0m\_a.

|        | x    | y     | z    | U(eq) |
|--------|------|-------|------|-------|
| H(2A)  | 4033 | 4778  | 3628 | 34    |
| H(2AB) | 4365 | 6366  | 4225 | 34    |
| H(3A)  | 2974 | 7873  | 3813 | 32    |
| H(3AB) | 2963 | 6683  | 3006 | 32    |
| H(4)   | 1590 | 6663  | 4242 | 28    |
| H(5A)  | 317  | 6317  | 3174 | 30    |
| H(5AB) | 1098 | 7698  | 2853 | 30    |
| H(6)   | 1820 | 5615  | 2040 | 32    |
| H(7A)  | 1207 | 2737  | 1992 | 33    |
| H(7AB) | 440  | 3174  | 2678 | 33    |
| H(8)   | 2647 | 3364  | 2976 | 29    |
| H(10A) | 474  | 2898  | 5361 | 34    |
| H(10B) | 860  | 4868  | 5315 | 34    |
| H(11)  | 2349 | 3756  | 5880 | 30    |
| H(13)  | 837  | 573   | 5869 | 33    |
| H(14)  | 1203 | -2259 | 6265 | 35    |
| H(15)  | 2858 | -3375 | 6202 | 34    |
| H(16)  | 4118 | -1664 | 5677 | 37    |
| H(17)  | 3749 | 1179  | 5279 | 35    |
| H(18A) | 333  | 6982  | 1384 | 55    |
| H(18B) | -386 | 5525  | 1726 | 55    |
| H(18C) | 392  | 5039  | 1055 | 55    |
| H(19A) | 1352 | 717   | 3536 | 48    |
| H(19B) | 2567 | 847   | 3790 | 48    |
| H(19C) | 2140 | 463   | 2847 | 48    |
| H(2AA) | 6044 | 5316  | 1104 | 42    |
| H(2AC) | 6033 | 4272  | 1954 | 42    |
| H(3AA) | 7383 | 5627  | 2524 | 39    |
| H(3AC) | 7556 | 6232  | 1604 | 39    |
| H(4A)  | 6786 | 8183  | 2885 | 34    |

|        |      |       |      |    |
|--------|------|-------|------|----|
| H(5AA) | 7932 | 10292 | 2589 | 39 |
| H(5AC) | 8554 | 8512  | 2600 | 39 |
| H(6A)  | 8428 | 8425  | 1153 | 39 |
| H(7AA) | 7268 | 11560 | 1135 | 37 |
| H(7AC) | 7570 | 10562 | 329  | 37 |
| H(8A)  | 6521 | 8216  | 636  | 29 |
| H(10C) | 4734 | 11705 | 2676 | 36 |
| H(10D) | 5352 | 10173 | 3179 | 36 |
| H(11A) | 4034 | 8597  | 2599 | 31 |
| H(13A) | 3790 | 12516 | 1658 | 36 |
| H(14A) | 2454 | 13390 | 689  | 41 |
| H(15A) | 1358 | 11375 | -1   | 43 |
| H(16A) | 1653 | 8429  | 238  | 45 |
| H(17A) | 2997 | 7545  | 1200 | 38 |
| H(18D) | 9460 | 10772 | 879  | 65 |
| H(18E) | 9816 | 10057 | 1790 | 65 |
| H(18F) | 9132 | 11772 | 1678 | 65 |
| H(19D) | 5746 | 10312 | -257 | 46 |
| H(19E) | 5388 | 11371 | 514  | 46 |
| H(19F) | 4905 | 9510  | 291  | 46 |

---



C4 - C3 C5 C9 H4 sp3 S  
C6 - C5 C7 C18 H6 sp3 S  
C8 - C7 C9 C19 H8 sp3 S  
C9 - O2 N1 C4 C8 sp3 R  
C11 - N1 C10 C12 H11 sp3 R

C4A - C3A C5A C9A H4A sp3 S  
C6A - C5A C7A C18A H6A sp3 S  
C8A - C7A C9A C19A H8A sp3 S  
C9A - O2A N1A C4A C8A sp3 R  
C11A - N1A C10A C12A H11A sp3 R

Crystallographic data for compound **8b**:

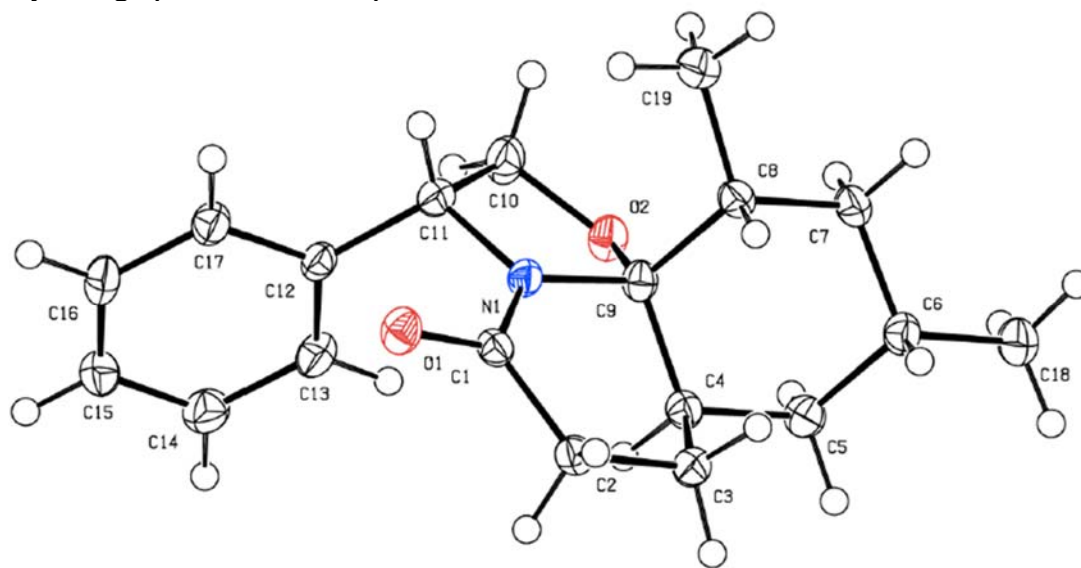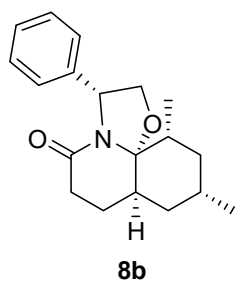

Table 1. Crystal data and structure refinement for **8b** (D59ZB1A\_0m\_a).

|                                   |                                             |                       |
|-----------------------------------|---------------------------------------------|-----------------------|
| Identification code               | D59ZB1A_0m_a                                |                       |
| Empirical formula                 | C19 H25 N O2                                |                       |
| Formula weight                    | 299.40                                      |                       |
| Temperature                       | 100(2) K                                    |                       |
| Wavelength                        | 0.71073 Å                                   |                       |
| Crystal system                    | Orthorhombic                                |                       |
| Space group                       | P 21 21 21                                  |                       |
| Unit cell dimensions              | a = 5.8915(3) Å                             | $\alpha = 90^\circ$ . |
|                                   | b = 10.8740(7) Å                            | $\beta = 90^\circ$ .  |
|                                   | c = 25.1352(17) Å                           | $\gamma = 90^\circ$ . |
| Volume                            | 1610.27(17) Å <sup>3</sup>                  |                       |
| Z                                 | 4                                           |                       |
| Density (calculated)              | 1.235 Mg/m <sup>3</sup>                     |                       |
| Absorption coefficient            | 0.079 mm <sup>-1</sup>                      |                       |
| F(000)                            | 648                                         |                       |
| Crystal size                      | 0.150 x 0.100 x 0.090 mm <sup>3</sup>       |                       |
| Theta range for data collection   | 2.041 to 30.514°.                           |                       |
| Index ranges                      | -8<=h<=7, -15<=k<=15, -35<=l<=35            |                       |
| Reflections collected             | 34286                                       |                       |
| Independent reflections           | 4900 [R(int) = 0.0799]                      |                       |
| Completeness to theta = 25.242°   | 99.9 %                                      |                       |
| Absorption correction             | Semi-empirical from equivalents             |                       |
| Max. and min. transmission        | 0.7461 and 0.6792                           |                       |
| Refinement method                 | Full-matrix least-squares on F <sup>2</sup> |                       |
| Data / restraints / parameters    | 4900 / 0 / 201                              |                       |
| Goodness-of-fit on F <sup>2</sup> | 1.116                                       |                       |
| Final R indices [I>2sigma(I)]     | R1 = 0.0474, wR2 = 0.0896                   |                       |
| R indices (all data)              | R1 = 0.0812, wR2 = 0.1098                   |                       |
| Absolute structure parameter      | 0.1(6)                                      |                       |
| Extinction coefficient            | n/a                                         |                       |
| Largest diff. peak and hole       | 0.245 and -0.279 e.Å <sup>-3</sup>          |                       |

Table 2. Atomic coordinates ( $\times 10^4$ ) and equivalent isotropic displacement parameters ( $\text{\AA}^2 \times 10^3$ ) for D59ZB1A\_0m\_a.  $U(\text{eq})$  is defined as one third of the trace of the orthogonalized  $U^{ij}$  tensor.

|       | x       | y        | z       | $U(\text{eq})$ |
|-------|---------|----------|---------|----------------|
| O(1)  | 7481(3) | 6571(2)  | 5674(1) | 24(1)          |
| O(2)  | 1504(3) | 7478(2)  | 6700(1) | 22(1)          |
| N(1)  | 4731(3) | 7246(2)  | 6221(1) | 18(1)          |
| C(1)  | 6051(4) | 7356(2)  | 5786(1) | 18(1)          |
| C(2)  | 5596(4) | 8417(2)  | 5412(1) | 19(1)          |
| C(3)  | 3876(4) | 9381(2)  | 5590(1) | 21(1)          |
| C(4)  | 2058(4) | 8856(2)  | 5962(1) | 18(1)          |
| C(5)  | 427(4)  | 9851(2)  | 6160(1) | 22(1)          |
| C(6)  | 1509(4) | 10753(2) | 6552(1) | 22(1)          |
| C(7)  | 2591(4) | 10036(2) | 7008(1) | 22(1)          |
| C(8)  | 4344(4) | 9098(2)  | 6807(1) | 20(1)          |
| C(9)  | 3177(4) | 8185(2)  | 6425(1) | 18(1)          |
| C(10) | 2525(5) | 6357(2)  | 6880(1) | 28(1)          |
| C(11) | 4527(4) | 6073(2)  | 6509(1) | 22(1)          |
| C(12) | 4056(4) | 5000(2)  | 6141(1) | 19(1)          |
| C(13) | 2062(4) | 4953(2)  | 5851(1) | 25(1)          |
| C(14) | 1613(5) | 3952(2)  | 5524(1) | 29(1)          |
| C(15) | 3154(5) | 2994(2)  | 5485(1) | 28(1)          |
| C(16) | 5147(4) | 3038(2)  | 5773(1) | 26(1)          |
| C(17) | 5598(4) | 4039(2)  | 6101(1) | 23(1)          |
| C(18) | -215(5) | 11693(2) | 6745(1) | 30(1)          |
| C(19) | 5645(5) | 8514(2)  | 7268(1) | 29(1)          |

Table 3. Bond lengths [Å] and angles [°] for D59ZB1A\_0m\_a.

---

|              |          |
|--------------|----------|
| O(1)-C(1)    | 1.233(3) |
| O(2)-C(9)    | 1.427(3) |
| O(2)-C(10)   | 1.433(3) |
| N(1)-C(1)    | 1.348(3) |
| N(1)-C(9)    | 1.465(3) |
| N(1)-C(11)   | 1.471(3) |
| C(1)-C(2)    | 1.512(3) |
| C(2)-C(3)    | 1.525(3) |
| C(2)-H(2A)   | 0.9900   |
| C(2)-H(2AB)  | 0.9900   |
| C(3)-C(4)    | 1.532(3) |
| C(3)-H(3A)   | 0.9900   |
| C(3)-H(3AB)  | 0.9900   |
| C(4)-C(9)    | 1.524(3) |
| C(4)-C(5)    | 1.529(3) |
| C(4)-H(4)    | 1.0000   |
| C(5)-C(6)    | 1.530(3) |
| C(5)-H(5A)   | 0.9900   |
| C(5)-H(5AB)  | 0.9900   |
| C(6)-C(18)   | 1.520(3) |
| C(6)-C(7)    | 1.525(3) |
| C(6)-H(6)    | 1.0000   |
| C(7)-C(8)    | 1.537(3) |
| C(7)-H(7A)   | 0.9900   |
| C(7)-H(7AB)  | 0.9900   |
| C(8)-C(19)   | 1.528(4) |
| C(8)-C(9)    | 1.542(3) |
| C(8)-H(8)    | 1.0000   |
| C(10)-C(11)  | 1.535(4) |
| C(10)-H(10A) | 0.9900   |
| C(10)-H(10B) | 0.9900   |
| C(11)-C(12)  | 1.515(3) |
| C(11)-H(11)  | 1.0000   |
| C(12)-C(13)  | 1.383(3) |

|                   |            |
|-------------------|------------|
| C(12)-C(17)       | 1.388(3)   |
| C(13)-C(14)       | 1.390(4)   |
| C(13)-H(13)       | 0.9500     |
| C(14)-C(15)       | 1.385(4)   |
| C(14)-H(14)       | 0.9500     |
| C(15)-C(16)       | 1.380(4)   |
| C(15)-H(15)       | 0.9500     |
| C(16)-C(17)       | 1.392(3)   |
| C(16)-H(16)       | 0.9500     |
| C(17)-H(17)       | 0.9500     |
| C(18)-H(18A)      | 0.9800     |
| C(18)-H(18B)      | 0.9800     |
| C(18)-H(18C)      | 0.9800     |
| C(19)-H(19A)      | 0.9800     |
| C(19)-H(19B)      | 0.9800     |
| C(19)-H(19C)      | 0.9800     |
|                   |            |
| C(9)-O(2)-C(10)   | 108.72(18) |
| C(1)-N(1)-C(9)    | 125.66(19) |
| C(1)-N(1)-C(11)   | 121.53(19) |
| C(9)-N(1)-C(11)   | 112.45(18) |
| O(1)-C(1)-N(1)    | 121.2(2)   |
| O(1)-C(1)-C(2)    | 120.5(2)   |
| N(1)-C(1)-C(2)    | 118.06(19) |
| C(1)-C(2)-C(3)    | 117.34(19) |
| C(1)-C(2)-H(2A)   | 108.0      |
| C(3)-C(2)-H(2A)   | 108.0      |
| C(1)-C(2)-H(2AB)  | 108.0      |
| C(3)-C(2)-H(2AB)  | 108.0      |
| H(2A)-C(2)-H(2AB) | 107.2      |
| C(2)-C(3)-C(4)    | 112.84(19) |
| C(2)-C(3)-H(3A)   | 109.0      |
| C(4)-C(3)-H(3A)   | 109.0      |
| C(2)-C(3)-H(3AB)  | 109.0      |
| C(4)-C(3)-H(3AB)  | 109.0      |
| H(3A)-C(3)-H(3AB) | 107.8      |

|                   |            |
|-------------------|------------|
| C(9)-C(4)-C(5)    | 111.22(19) |
| C(9)-C(4)-C(3)    | 110.01(19) |
| C(5)-C(4)-C(3)    | 111.96(19) |
| C(9)-C(4)-H(4)    | 107.8      |
| C(5)-C(4)-H(4)    | 107.8      |
| C(3)-C(4)-H(4)    | 107.8      |
| C(4)-C(5)-C(6)    | 113.6(2)   |
| C(4)-C(5)-H(5A)   | 108.8      |
| C(6)-C(5)-H(5A)   | 108.8      |
| C(4)-C(5)-H(5AB)  | 108.8      |
| C(6)-C(5)-H(5AB)  | 108.8      |
| H(5A)-C(5)-H(5AB) | 107.7      |
| C(18)-C(6)-C(7)   | 112.6(2)   |
| C(18)-C(6)-C(5)   | 111.0(2)   |
| C(7)-C(6)-C(5)    | 109.3(2)   |
| C(18)-C(6)-H(6)   | 107.9      |
| C(7)-C(6)-H(6)    | 107.9      |
| C(5)-C(6)-H(6)    | 107.9      |
| C(6)-C(7)-C(8)    | 111.94(19) |
| C(6)-C(7)-H(7A)   | 109.2      |
| C(8)-C(7)-H(7A)   | 109.2      |
| C(6)-C(7)-H(7AB)  | 109.2      |
| C(8)-C(7)-H(7AB)  | 109.2      |
| H(7A)-C(7)-H(7AB) | 107.9      |
| C(19)-C(8)-C(7)   | 111.3(2)   |
| C(19)-C(8)-C(9)   | 115.4(2)   |
| C(7)-C(8)-C(9)    | 109.4(2)   |
| C(19)-C(8)-H(8)   | 106.8      |
| C(7)-C(8)-H(8)    | 106.8      |
| C(9)-C(8)-H(8)    | 106.8      |
| O(2)-C(9)-N(1)    | 103.00(17) |
| O(2)-C(9)-C(4)    | 109.17(18) |
| N(1)-C(9)-C(4)    | 109.68(19) |
| O(2)-C(9)-C(8)    | 110.74(19) |
| N(1)-C(9)-C(8)    | 112.82(19) |
| C(4)-C(9)-C(8)    | 111.10(18) |

|                     |            |
|---------------------|------------|
| O(2)-C(10)-C(11)    | 107.60(19) |
| O(2)-C(10)-H(10A)   | 110.2      |
| C(11)-C(10)-H(10A)  | 110.2      |
| O(2)-C(10)-H(10B)   | 110.2      |
| C(11)-C(10)-H(10B)  | 110.2      |
| H(10A)-C(10)-H(10B) | 108.5      |
| N(1)-C(11)-C(12)    | 112.50(19) |
| N(1)-C(11)-C(10)    | 100.75(18) |
| C(12)-C(11)-C(10)   | 112.6(2)   |
| N(1)-C(11)-H(11)    | 110.2      |
| C(12)-C(11)-H(11)   | 110.2      |
| C(10)-C(11)-H(11)   | 110.2      |
| C(13)-C(12)-C(17)   | 119.4(2)   |
| C(13)-C(12)-C(11)   | 120.4(2)   |
| C(17)-C(12)-C(11)   | 120.2(2)   |
| C(12)-C(13)-C(14)   | 120.1(2)   |
| C(12)-C(13)-H(13)   | 119.9      |
| C(14)-C(13)-H(13)   | 119.9      |
| C(15)-C(14)-C(13)   | 120.4(2)   |
| C(15)-C(14)-H(14)   | 119.8      |
| C(13)-C(14)-H(14)   | 119.8      |
| C(16)-C(15)-C(14)   | 119.7(2)   |
| C(16)-C(15)-H(15)   | 120.2      |
| C(14)-C(15)-H(15)   | 120.2      |
| C(15)-C(16)-C(17)   | 120.0(2)   |
| C(15)-C(16)-H(16)   | 120.0      |
| C(17)-C(16)-H(16)   | 120.0      |
| C(12)-C(17)-C(16)   | 120.4(2)   |
| C(12)-C(17)-H(17)   | 119.8      |
| C(16)-C(17)-H(17)   | 119.8      |
| C(6)-C(18)-H(18A)   | 109.5      |
| C(6)-C(18)-H(18B)   | 109.5      |
| H(18A)-C(18)-H(18B) | 109.5      |
| C(6)-C(18)-H(18C)   | 109.5      |
| H(18A)-C(18)-H(18C) | 109.5      |
| H(18B)-C(18)-H(18C) | 109.5      |



|                     |       |
|---------------------|-------|
| C(8)-C(19)-H(19A)   | 109.5 |
| C(8)-C(19)-H(19B)   | 109.5 |
| H(19A)-C(19)-H(19B) | 109.5 |
| C(8)-C(19)-H(19C)   | 109.5 |
| H(19A)-C(19)-H(19C) | 109.5 |
| H(19B)-C(19)-H(19C) | 109.5 |

---

Symmetry transformations used to generate equivalent atoms:

Table 4. Anisotropic displacement parameters ( $\text{\AA}^2 \times 10^3$ ) for D59ZB1A\_0m\_a. The anisotropic displacement factor exponent takes the form:  $-2\pi^2 [ h^2 a^* U^{11} + \dots + 2 h k a^* b^* U^{12} ]$

|       | U <sup>11</sup> | U <sup>22</sup> | U <sup>33</sup> | U <sup>23</sup> | U <sup>13</sup> | U <sup>12</sup> |
|-------|-----------------|-----------------|-----------------|-----------------|-----------------|-----------------|
| O(1)  | 21(1)           | 24(1)           | 28(1)           | -1(1)           | 4(1)            | 6(1)            |
| O(2)  | 24(1)           | 19(1)           | 23(1)           | 2(1)            | 7(1)            | 0(1)            |
| N(1)  | 22(1)           | 16(1)           | 17(1)           | 1(1)            | 3(1)            | 3(1)            |
| C(1)  | 18(1)           | 19(1)           | 17(1)           | -3(1)           | 0(1)            | 1(1)            |
| C(2)  | 20(1)           | 20(1)           | 18(1)           | 0(1)            | 2(1)            | -1(1)           |
| C(3)  | 25(1)           | 19(1)           | 19(1)           | 1(1)            | 1(1)            | 2(1)            |
| C(4)  | 18(1)           | 19(1)           | 19(1)           | -2(1)           | 0(1)            | 1(1)            |
| C(5)  | 18(1)           | 24(1)           | 23(1)           | -1(1)           | 0(1)            | 3(1)            |
| C(6)  | 24(1)           | 19(1)           | 23(1)           | -1(1)           | 2(1)            | 3(1)            |
| C(7)  | 24(1)           | 21(1)           | 20(1)           | -5(1)           | 1(1)            | 3(1)            |
| C(8)  | 22(1)           | 21(1)           | 17(1)           | -2(1)           | 0(1)            | 2(1)            |
| C(9)  | 17(1)           | 17(1)           | 21(1)           | -1(1)           | 3(1)            | 1(1)            |
| C(10) | 39(2)           | 19(1)           | 25(1)           | 2(1)            | 9(1)            | 3(1)            |
| C(11) | 28(1)           | 19(1)           | 18(1)           | 2(1)            | 1(1)            | 4(1)            |
| C(12) | 22(1)           | 15(1)           | 19(1)           | 3(1)            | 3(1)            | 2(1)            |
| C(13) | 25(1)           | 20(1)           | 30(1)           | 3(1)            | -2(1)           | 5(1)            |
| C(14) | 31(1)           | 25(1)           | 31(1)           | 2(1)            | -9(1)           | -1(1)           |
| C(15) | 39(2)           | 20(1)           | 26(1)           | -2(1)           | -2(1)           | -1(1)           |
| C(16) | 29(1)           | 17(1)           | 32(1)           | -1(1)           | 3(1)            | 5(1)            |
| C(17) | 23(1)           | 19(1)           | 26(1)           | 0(1)            | -1(1)           | 3(1)            |
| C(18) | 34(1)           | 27(1)           | 29(1)           | -5(1)           | -1(1)           | 9(1)            |
| C(19) | 35(1)           | 29(1)           | 25(1)           | -4(1)           | -7(1)           | 7(1)            |

---

Table 5. Hydrogen coordinates ( $\times 10^4$ ) and isotropic displacement parameters ( $\text{\AA}^2 \times 10^{-3}$ ) for D59ZB1A\_0m\_a.

|        | x     | y     | z    | U(eq) |
|--------|-------|-------|------|-------|
| H(2A)  | 5071  | 8073  | 5069 | 23    |
| H(2AB) | 7055  | 8840  | 5344 | 23    |
| H(3A)  | 3128  | 9735  | 5272 | 25    |
| H(3AB) | 4686  | 10054 | 5775 | 25    |
| H(4)   | 1153  | 8241  | 5756 | 22    |
| H(5A)  | -886  | 9450  | 6334 | 26    |
| H(5AB) | -151  | 10317 | 5850 | 26    |
| H(6)   | 2742  | 11204 | 6361 | 26    |
| H(7A)  | 1390  | 9599  | 7208 | 26    |
| H(7AB) | 3342  | 10618 | 7254 | 26    |
| H(8)   | 5477  | 9567  | 6591 | 24    |
| H(10A) | 1405  | 5679  | 6868 | 33    |
| H(10B) | 3065  | 6450  | 7250 | 33    |
| H(11)  | 5931  | 5914  | 6722 | 26    |
| H(13)  | 998   | 5607  | 5876 | 30    |
| H(14)  | 241   | 3924  | 5325 | 35    |
| H(15)  | 2840  | 2310  | 5262 | 34    |
| H(16)  | 6213  | 2386  | 5746 | 31    |
| H(17)  | 6968  | 4065  | 6300 | 28    |
| H(18A) | -709  | 12202 | 6445 | 45    |
| H(18B) | 481   | 12217 | 7017 | 45    |
| H(18C) | -1529 | 11266 | 6897 | 45    |
| H(19A) | 6671  | 7881  | 7130 | 44    |
| H(19B) | 4569  | 8140  | 7517 | 44    |
| H(19C) | 6528  | 9148  | 7452 | 44    |

|     |      |     |     |     |     |   |
|-----|------|-----|-----|-----|-----|---|
| C4  | - C3 | C5  | C9  | H4  | sp3 | R |
| C6  | - C5 | C7  | C18 | H6  | sp3 | R |
| C8  | - C7 | C9  | C19 | H8  | sp3 | R |
| C9  | - O2 | N1  | C4  | C8  | sp3 | S |
| C11 | - N1 | C10 | C12 | H11 | sp3 | R |

Crystallographic data for compound **8d**:

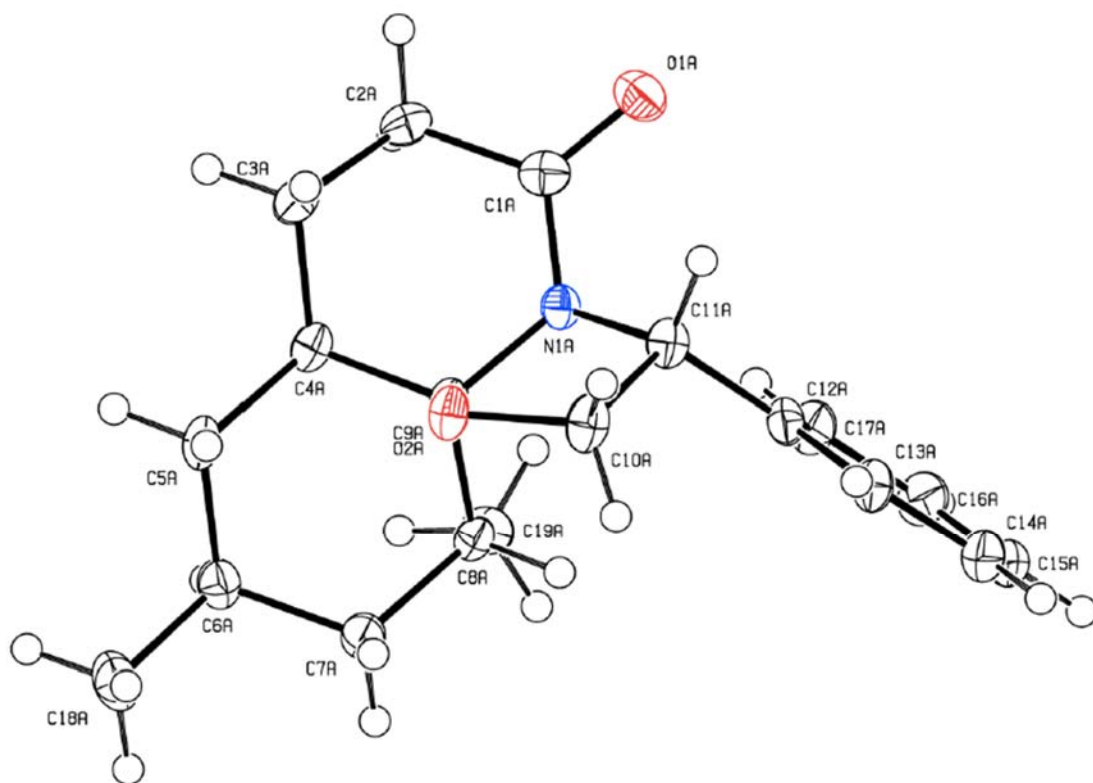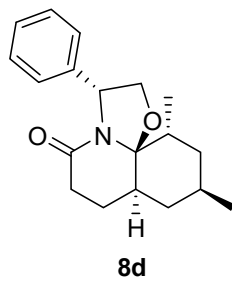

Table 1. Crystal data and structure refinement for **8d** (D59ZB10\_0ma\_a1).

|                                   |                                                  |          |
|-----------------------------------|--------------------------------------------------|----------|
| Identification code               | D59ZB10_0ma_a1                                   |          |
| Empirical formula                 | C <sub>19</sub> H <sub>25</sub> N O <sub>2</sub> |          |
| Formula weight                    | 299.40                                           |          |
| Temperature                       | 293(2) K                                         |          |
| Wavelength                        | 0.71073 Å                                        |          |
| Crystal system                    | Orthorhombic                                     |          |
| Space group                       | P 21 21 21                                       |          |
| Unit cell dimensions              | a = 6.1740(7) Å                                  | α = 90°. |
|                                   | b = 8.1207(9) Å                                  | β = 90°. |
|                                   | c = 32.235(3) Å                                  | γ = 90°. |
| Volume                            | 1616.2(3) Å <sup>3</sup>                         |          |
| Z                                 | 4                                                |          |
| Density (calculated)              | 1.230 Mg/m <sup>3</sup>                          |          |
| Absorption coefficient            | 0.079 mm <sup>-1</sup>                           |          |
| F(000)                            | 648                                              |          |
| Crystal size                      | 0.210 x 0.090 x 0.06 mm <sup>3</sup>             |          |
| Theta range for data collection   | 2.527 to 31.697°.                                |          |
| Index ranges                      | -8 ≤ h ≤ 8, -11 ≤ k ≤ 11, -47 ≤ l ≤ 46           |          |
| Reflections collected             | 52659                                            |          |
| Independent reflections           | 5291 [R(int) = 0.1293]                           |          |
| Completeness to theta = 25.242°   | 99.9 %                                           |          |
| Absorption correction             | Semi-empirical from equivalents                  |          |
| Max. and min. transmission        | 0.7461 and 0.6273                                |          |
| Refinement method                 | Full-matrix least-squares on F <sup>2</sup>      |          |
| Data / restraints / parameters    | 5291 / 0 / 202                                   |          |
| Goodness-of-fit on F <sup>2</sup> | 1.032                                            |          |
| Final R indices [I > 2σ(I)]       | R1 = 0.0675, wR2 = 0.1230                        |          |
| R indices (all data)              | R1 = 0.1220, wR2 = 0.1532                        |          |
| Absolute structure parameter      | 0(2)                                             |          |
| Extinction coefficient            | n/a                                              |          |
| Largest diff. peak and hole       | 0.399 and -0.482 e.Å <sup>-3</sup>               |          |

Table 2. Atomic coordinates ( $\times 10^4$ ) and equivalent isotropic displacement parameters ( $\text{\AA}^2 \times 10^3$ ) for D59ZB10\_0ma\_a1.  $U(\text{eq})$  is defined as one third of the trace of the orthogonalized  $U^{ij}$  tensor.

|        | x       | y        | z       | $U(\text{eq})$ |
|--------|---------|----------|---------|----------------|
| O(1A)  | 723(5)  | 10085(3) | 3695(1) | 28(1)          |
| O(2A)  | 5751(4) | 6826(3)  | 3916(1) | 20(1)          |
| N(1A)  | 2449(4) | 7623(3)  | 3690(1) | 18(1)          |
| C(1A)  | 1261(5) | 8839(4)  | 3883(1) | 22(1)          |
| C(2A)  | 646(6)  | 8581(5)  | 4331(1) | 26(1)          |
| C(3A)  | 2397(6) | 7667(5)  | 4572(1) | 25(1)          |
| C(4A)  | 2770(6) | 6030(4)  | 4359(1) | 21(1)          |
| C(5A)  | 4318(6) | 4821(4)  | 4571(1) | 23(1)          |
| C(6A)  | 4321(6) | 3151(4)  | 4356(1) | 23(1)          |
| C(7A)  | 4786(5) | 3345(4)  | 3890(1) | 21(1)          |
| C(8A)  | 3361(5) | 4634(4)  | 3674(1) | 19(1)          |
| C(9A)  | 3536(5) | 6273(4)  | 3911(1) | 17(1)          |
| C(10A) | 6141(5) | 7497(5)  | 3512(1) | 24(1)          |
| C(11A) | 3918(5) | 8160(4)  | 3355(1) | 20(1)          |
| C(12A) | 3339(6) | 7580(4)  | 2919(1) | 21(1)          |
| C(13A) | 4908(6) | 7702(4)  | 2610(1) | 23(1)          |
| C(14A) | 4447(7) | 7212(4)  | 2207(1) | 27(1)          |
| C(15A) | 2413(6) | 6593(4)  | 2107(1) | 27(1)          |
| C(16A) | 847(6)  | 6488(5)  | 2413(1) | 28(1)          |
| C(17A) | 1312(6) | 6987(5)  | 2817(1) | 26(1)          |
| C(18A) | 5937(7) | 1972(5)  | 4554(1) | 33(1)          |
| C(19A) | 1012(6) | 4046(4)  | 3624(1) | 25(1)          |

Table 3. Bond lengths [Å] and angles [°] for D59ZB10\_0ma\_a1.

---

|               |          |
|---------------|----------|
| O(1A)-C(1A)   | 1.226(4) |
| O(2A)-C(10A)  | 1.435(4) |
| O(2A)-C(9A)   | 1.439(4) |
| N(1A)-C(1A)   | 1.378(4) |
| N(1A)-C(9A)   | 1.469(4) |
| N(1A)-C(11A)  | 1.476(4) |
| C(1A)-C(2A)   | 1.509(5) |
| C(2A)-C(3A)   | 1.524(5) |
| C(2A)-H(1)    | 0.9700   |
| C(2A)-H(2)    | 0.9700   |
| C(3A)-C(4A)   | 1.514(5) |
| C(3A)-H(3)    | 0.9700   |
| C(3A)-H(4)    | 0.9700   |
| C(4A)-C(5A)   | 1.532(5) |
| C(4A)-C(9A)   | 1.533(4) |
| C(4A)-H(4A)   | 0.9800   |
| C(5A)-C(6A)   | 1.523(5) |
| C(5A)-H(5)    | 0.9700   |
| C(5A)-H(6)    | 0.9700   |
| C(6A)-C(18A)  | 1.523(5) |
| C(6A)-C(7A)   | 1.535(4) |
| C(6A)-H(6A)   | 0.9800   |
| C(7A)-C(8A)   | 1.535(5) |
| C(7A)-H(7)    | 0.9700   |
| C(7A)-H(8)    | 0.9700   |
| C(8A)-C(19A)  | 1.535(5) |
| C(8A)-C(9A)   | 1.538(4) |
| C(8A)-H(8A)   | 0.9800   |
| C(10A)-C(11A) | 1.559(5) |
| C(10A)-H(10A) | 0.9700   |
| C(10A)-H(10B) | 0.9700   |
| C(11A)-C(12A) | 1.524(5) |
| C(11A)-H(11A) | 0.9800   |
| C(12A)-C(17A) | 1.381(5) |

|               |          |
|---------------|----------|
| C(12A)-C(13A) | 1.393(5) |
| C(13A)-C(14A) | 1.390(5) |
| C(13A)-H(13A) | 0.9300   |
| C(14A)-C(15A) | 1.390(5) |
| C(14A)-H(14A) | 0.9300   |
| C(15A)-C(16A) | 1.384(5) |
| C(15A)-H(15A) | 0.9300   |
| C(16A)-C(17A) | 1.395(5) |
| C(16A)-H(16A) | 0.9300   |
| C(17A)-H(17A) | 0.9300   |
| C(18A)-H(18A) | 0.9600   |
| C(18A)-H(18B) | 0.9600   |
| C(18A)-H(18C) | 0.9600   |
| C(19A)-H(19A) | 0.9600   |
| C(19A)-H(19B) | 0.9600   |
| C(19A)-H(19C) | 0.9600   |

|                    |          |
|--------------------|----------|
| C(10A)-O(2A)-C(9A) | 105.4(2) |
| C(1A)-N(1A)-C(9A)  | 124.0(3) |
| C(1A)-N(1A)-C(11A) | 116.4(3) |
| C(9A)-N(1A)-C(11A) | 107.1(2) |
| O(1A)-C(1A)-N(1A)  | 120.9(3) |
| O(1A)-C(1A)-C(2A)  | 121.3(3) |
| N(1A)-C(1A)-C(2A)  | 117.8(3) |
| C(1A)-C(2A)-C(3A)  | 112.2(3) |
| C(1A)-C(2A)-H(1)   | 109.2    |
| C(3A)-C(2A)-H(1)   | 109.2    |
| C(1A)-C(2A)-H(2)   | 109.2    |
| C(3A)-C(2A)-H(2)   | 109.2    |
| H(1)-C(2A)-H(2)    | 107.9    |
| C(4A)-C(3A)-C(2A)  | 107.7(3) |
| C(4A)-C(3A)-H(3)   | 110.2    |
| C(2A)-C(3A)-H(3)   | 110.2    |
| C(4A)-C(3A)-H(4)   | 110.2    |
| C(2A)-C(3A)-H(4)   | 110.2    |
| H(3)-C(3A)-H(4)    | 108.5    |



|                    |          |
|--------------------|----------|
| C(3A)-C(4A)-C(5A)  | 117.0(3) |
| C(3A)-C(4A)-C(9A)  | 111.2(3) |
| C(5A)-C(4A)-C(9A)  | 108.2(3) |
| C(3A)-C(4A)-H(4A)  | 106.6    |
| C(5A)-C(4A)-H(4A)  | 106.6    |
| C(9A)-C(4A)-H(4A)  | 106.6    |
| C(6A)-C(5A)-C(4A)  | 111.5(3) |
| C(6A)-C(5A)-H(5)   | 109.3    |
| C(4A)-C(5A)-H(5)   | 109.3    |
| C(6A)-C(5A)-H(6)   | 109.3    |
| C(4A)-C(5A)-H(6)   | 109.3    |
| H(5)-C(5A)-H(6)    | 108.0    |
| C(18A)-C(6A)-C(5A) | 111.6(3) |
| C(18A)-C(6A)-C(7A) | 110.6(3) |
| C(5A)-C(6A)-C(7A)  | 110.8(3) |
| C(18A)-C(6A)-H(6A) | 107.9    |
| C(5A)-C(6A)-H(6A)  | 107.9    |
| C(7A)-C(6A)-H(6A)  | 107.9    |
| C(6A)-C(7A)-C(8A)  | 114.0(3) |
| C(6A)-C(7A)-H(7)   | 108.7    |
| C(8A)-C(7A)-H(7)   | 108.7    |
| C(6A)-C(7A)-H(8)   | 108.7    |
| C(8A)-C(7A)-H(8)   | 108.7    |
| H(7)-C(7A)-H(8)    | 107.6    |
| C(19A)-C(8A)-C(7A) | 112.2(3) |
| C(19A)-C(8A)-C(9A) | 112.8(3) |
| C(7A)-C(8A)-C(9A)  | 108.9(3) |
| C(19A)-C(8A)-H(8A) | 107.6    |
| C(7A)-C(8A)-H(8A)  | 107.6    |
| C(9A)-C(8A)-H(8A)  | 107.6    |
| O(2A)-C(9A)-N(1A)  | 102.0(2) |
| O(2A)-C(9A)-C(4A)  | 108.7(2) |
| N(1A)-C(9A)-C(4A)  | 114.3(3) |
| O(2A)-C(9A)-C(8A)  | 110.1(2) |
| N(1A)-C(9A)-C(8A)  | 111.9(2) |
| C(4A)-C(9A)-C(8A)  | 109.5(3) |

|                      |          |
|----------------------|----------|
| O(2A)-C(10A)-C(11A)  | 106.1(2) |
| O(2A)-C(10A)-H(10A)  | 110.5    |
| C(11A)-C(10A)-H(10A) | 110.5    |
| O(2A)-C(10A)-H(10B)  | 110.5    |
| C(11A)-C(10A)-H(10B) | 110.5    |
| H(10A)-C(10A)-H(10B) | 108.7    |
| N(1A)-C(11A)-C(12A)  | 116.0(3) |
| N(1A)-C(11A)-C(10A)  | 101.7(2) |
| C(12A)-C(11A)-C(10A) | 113.4(3) |
| N(1A)-C(11A)-H(11A)  | 108.5    |
| C(12A)-C(11A)-H(11A) | 108.5    |
| C(10A)-C(11A)-H(11A) | 108.5    |
| C(17A)-C(12A)-C(13A) | 119.0(3) |
| C(17A)-C(12A)-C(11A) | 122.7(3) |
| C(13A)-C(12A)-C(11A) | 118.3(3) |
| C(14A)-C(13A)-C(12A) | 120.5(3) |
| C(14A)-C(13A)-H(13A) | 119.8    |
| C(12A)-C(13A)-H(13A) | 119.8    |
| C(13A)-C(14A)-C(15A) | 120.3(3) |
| C(13A)-C(14A)-H(14A) | 119.8    |
| C(15A)-C(14A)-H(14A) | 119.8    |
| C(16A)-C(15A)-C(14A) | 119.3(3) |
| C(16A)-C(15A)-H(15A) | 120.4    |
| C(14A)-C(15A)-H(15A) | 120.4    |
| C(15A)-C(16A)-C(17A) | 120.3(3) |
| C(15A)-C(16A)-H(16A) | 119.9    |
| C(17A)-C(16A)-H(16A) | 119.9    |
| C(12A)-C(17A)-C(16A) | 120.7(3) |
| C(12A)-C(17A)-H(17A) | 119.6    |
| C(16A)-C(17A)-H(17A) | 119.6    |
| C(6A)-C(18A)-H(18A)  | 109.5    |
| C(6A)-C(18A)-H(18B)  | 109.5    |
| H(18A)-C(18A)-H(18B) | 109.5    |
| C(6A)-C(18A)-H(18C)  | 109.5    |
| H(18A)-C(18A)-H(18C) | 109.5    |
| H(18B)-C(18A)-H(18C) | 109.5    |

|                      |       |
|----------------------|-------|
| C(8A)-C(19A)-H(19A)  | 109.5 |
| C(8A)-C(19A)-H(19B)  | 109.5 |
| H(19A)-C(19A)-H(19B) | 109.5 |
| C(8A)-C(19A)-H(19C)  | 109.5 |
| H(19A)-C(19A)-H(19C) | 109.5 |
| H(19B)-C(19A)-H(19C) | 109.5 |

---

Symmetry transformations used to generate equivalent atoms:

Table 4. Anisotropic displacement parameters ( $\text{\AA}^2 \times 10^3$ ) for D59ZB10\_0ma\_a1. The anisotropic displacement factor exponent takes the form:  $-2\pi^2 [ h^2 a^{*2} U^{11} + \dots + 2 h k a^* b^* U^{12} ]$

|        | U <sup>11</sup> | U <sup>22</sup> | U <sup>33</sup> | U <sup>23</sup> | U <sup>13</sup> | U <sup>12</sup> |
|--------|-----------------|-----------------|-----------------|-----------------|-----------------|-----------------|
| O(1A)  | 30(1)           | 24(1)           | 32(1)           | 2(1)            | -4(1)           | 3(1)            |
| O(2A)  | 15(1)           | 29(1)           | 16(1)           | 3(1)            | -2(1)           | -4(1)           |
| N(1A)  | 17(1)           | 20(1)           | 16(1)           | 1(1)            | -1(1)           | -1(1)           |
| C(1A)  | 17(2)           | 21(2)           | 26(2)           | -4(1)           | -3(1)           | -2(1)           |
| C(2A)  | 27(2)           | 27(2)           | 24(2)           | -4(1)           | 6(2)            | 6(2)            |
| C(3A)  | 29(2)           | 29(2)           | 18(2)           | -3(1)           | 2(1)            | 3(2)            |
| C(4A)  | 21(2)           | 27(2)           | 16(1)           | -1(1)           | -1(1)           | -2(1)           |
| C(5A)  | 25(2)           | 29(2)           | 15(2)           | 3(1)            | -2(1)           | -3(2)           |
| C(6A)  | 22(2)           | 26(2)           | 21(2)           | 3(1)            | -1(1)           | 1(1)            |
| C(7A)  | 19(2)           | 25(2)           | 20(2)           | 0(1)            | 0(1)            | 2(1)            |
| C(8A)  | 18(2)           | 24(2)           | 15(1)           | -1(1)           | 0(1)            | 0(1)            |
| C(9A)  | 14(1)           | 22(2)           | 15(1)           | -1(1)           | -2(1)           | -2(1)           |
| C(10A) | 18(2)           | 36(2)           | 19(2)           | 4(2)            | 0(1)            | -4(2)           |
| C(11A) | 18(2)           | 23(2)           | 20(2)           | 2(1)            | 1(1)            | -5(1)           |
| C(12A) | 24(2)           | 22(2)           | 16(1)           | 4(1)            | 0(1)            | 1(1)            |
| C(13A) | 24(2)           | 26(2)           | 19(2)           | 4(1)            | 1(1)            | -4(1)           |
| C(14A) | 33(2)           | 27(2)           | 20(2)           | 3(1)            | 3(2)            | 0(2)            |
| C(15A) | 34(2)           | 28(2)           | 18(2)           | -1(1)           | -6(1)           | 8(2)            |
| C(16A) | 22(2)           | 37(2)           | 25(2)           | -4(2)           | -8(1)           | 5(2)            |
| C(17A) | 18(2)           | 36(2)           | 22(2)           | 0(2)            | -2(1)           | 4(2)            |
| C(18A) | 35(2)           | 34(2)           | 29(2)           | 9(2)            | -3(2)           | 5(2)            |
| C(19A) | 22(2)           | 24(2)           | 30(2)           | -3(1)           | -6(1)           | 0(1)            |

Table 5. Hydrogen coordinates ( $\times 10^4$ ) and isotropic displacement parameters ( $\text{\AA}^2 \times 10^{-3}$ ) for D59ZB10\_0ma\_a1.

|        | x    | y    | z    | U(eq) |
|--------|------|------|------|-------|
| H(1)   | -693 | 7957 | 4344 | 31    |
| H(2)   | 391  | 9642 | 4460 | 31    |
| H(3)   | 3725 | 8305 | 4575 | 30    |
| H(4)   | 1936 | 7492 | 4856 | 30    |
| H(4A)  | 1358 | 5482 | 4344 | 25    |
| H(5)   | 5773 | 5272 | 4568 | 28    |
| H(6)   | 3887 | 4680 | 4859 | 28    |
| H(6A)  | 2872 | 2673 | 4386 | 27    |
| H(7)   | 4574 | 2289 | 3756 | 26    |
| H(8)   | 6294 | 3651 | 3855 | 26    |
| H(8A)  | 3953 | 4810 | 3395 | 23    |
| H(10A) | 6686 | 6652 | 3326 | 29    |
| H(10B) | 7195 | 8381 | 3526 | 29    |
| H(11A) | 3970 | 9367 | 3355 | 24    |
| H(13A) | 6272 | 8115 | 2674 | 28    |
| H(14A) | 5505 | 7298 | 2002 | 32    |
| H(15A) | 2108 | 6254 | 1838 | 32    |
| H(16A) | -522 | 6084 | 2348 | 34    |
| H(17A) | 245  | 6919 | 3020 | 31    |
| H(18A) | 5580 | 1823 | 4841 | 49    |
| H(18B) | 7371 | 2421 | 4531 | 49    |
| H(18C) | 5880 | 929  | 4414 | 49    |
| H(19A) | 915  | 3312 | 3391 | 38    |
| H(19B) | 86   | 4979 | 3578 | 38    |
| H(19C) | 565  | 3481 | 3871 | 38    |

Table 6. Torsion angles [°] for D59ZB10\_0ma\_a1.

|                          |           |
|--------------------------|-----------|
| C(9A)-N(1A)-C(1A)-O(1A)  | 166.7(3)  |
| C(11A)-N(1A)-C(1A)-O(1A) | 29.7(4)   |
| C(9A)-N(1A)-C(1A)-C(2A)  | -13.4(5)  |
| C(11A)-N(1A)-C(1A)-C(2A) | -150.4(3) |
| O(1A)-C(1A)-C(2A)-C(3A)  | -145.3(3) |
| N(1A)-C(1A)-C(2A)-C(3A)  | 34.8(4)   |
| C(1A)-C(2A)-C(3A)-C(4A)  | -58.1(4)  |
| C(2A)-C(3A)-C(4A)-C(5A)  | -174.3(3) |
| C(2A)-C(3A)-C(4A)-C(9A)  | 60.8(4)   |
| C(3A)-C(4A)-C(5A)-C(6A)  | 172.6(3)  |
| C(9A)-C(4A)-C(5A)-C(6A)  | -60.9(4)  |
| C(4A)-C(5A)-C(6A)-C(18A) | 177.3(3)  |
| C(4A)-C(5A)-C(6A)-C(7A)  | 53.6(4)   |
| C(18A)-C(6A)-C(7A)-C(8A) | -174.8(3) |
| C(5A)-C(6A)-C(7A)-C(8A)  | -50.4(4)  |
| C(6A)-C(7A)-C(8A)-C(19A) | -72.1(4)  |
| C(6A)-C(7A)-C(8A)-C(9A)  | 53.4(4)   |
| C(10A)-O(2A)-C(9A)-N(1A) | -41.8(3)  |
| C(10A)-O(2A)-C(9A)-C(4A) | -162.9(3) |
| C(10A)-O(2A)-C(9A)-C(8A) | 77.1(3)   |
| C(1A)-N(1A)-C(9A)-O(2A)  | -101.4(3) |
| C(11A)-N(1A)-C(9A)-O(2A) | 38.9(3)   |
| C(1A)-N(1A)-C(9A)-C(4A)  | 15.8(4)   |
| C(11A)-N(1A)-C(9A)-C(4A) | 156.0(3)  |
| C(1A)-N(1A)-C(9A)-C(8A)  | 141.0(3)  |
| C(11A)-N(1A)-C(9A)-C(8A) | -78.7(3)  |
| C(3A)-C(4A)-C(9A)-O(2A)  | 73.5(3)   |
| C(5A)-C(4A)-C(9A)-O(2A)  | -56.3(3)  |
| C(3A)-C(4A)-C(9A)-N(1A)  | -39.7(4)  |
| C(5A)-C(4A)-C(9A)-N(1A)  | -169.5(3) |
| C(3A)-C(4A)-C(9A)-C(8A)  | -166.2(3) |
| C(5A)-C(4A)-C(9A)-C(8A)  | 64.0(3)   |
| C(19A)-C(8A)-C(9A)-O(2A) | -175.2(3) |
| C(7A)-C(8A)-C(9A)-O(2A)  | 59.7(3)   |

|                             |           |
|-----------------------------|-----------|
| C(19A)-C(8A)-C(9A)-N(1A)    | -62.5(4)  |
| C(7A)-C(8A)-C(9A)-N(1A)     | 172.3(3)  |
| C(19A)-C(8A)-C(9A)-C(4A)    | 65.3(3)   |
| C(7A)-C(8A)-C(9A)-C(4A)     | -59.8(3)  |
| C(9A)-O(2A)-C(10A)-C(11A)   | 29.4(3)   |
| C(1A)-N(1A)-C(11A)-C(12A)   | -113.2(3) |
| C(9A)-N(1A)-C(11A)-C(12A)   | 103.0(3)  |
| C(1A)-N(1A)-C(11A)-C(10A)   | 123.2(3)  |
| C(9A)-N(1A)-C(11A)-C(10A)   | -20.5(3)  |
| O(2A)-C(10A)-C(11A)-N(1A)   | -5.1(3)   |
| O(2A)-C(10A)-C(11A)-C(12A)  | -130.4(3) |
| N(1A)-C(11A)-C(12A)-C(17A)  | 17.2(5)   |
| C(10A)-C(11A)-C(12A)-C(17A) | 134.4(4)  |
| N(1A)-C(11A)-C(12A)-C(13A)  | -164.8(3) |
| C(10A)-C(11A)-C(12A)-C(13A) | -47.6(4)  |
| C(17A)-C(12A)-C(13A)-C(14A) | -0.9(5)   |
| C(11A)-C(12A)-C(13A)-C(14A) | -179.0(3) |
| C(12A)-C(13A)-C(14A)-C(15A) | 0.0(5)    |
| C(13A)-C(14A)-C(15A)-C(16A) | 0.7(5)    |
| C(14A)-C(15A)-C(16A)-C(17A) | -0.5(6)   |
| C(13A)-C(12A)-C(17A)-C(16A) | 1.2(6)    |
| C(11A)-C(12A)-C(17A)-C(16A) | 179.2(3)  |
| C(15A)-C(16A)-C(17A)-C(12A) | -0.5(6)   |

---

Symmetry transformations used to generate equivalent atoms:

C4A - C3A C5A C9A H4A sp3 R  
C6A - C5A C7A C18A H6A sp3 S  
C8A - C7A C9A C19A H8A sp3 R  
C9A - O2A N1A C4A C8A sp3 R  
C11A - N1A C10A C12A H11A sp3 R



Crystallographic data for compound **9a**:

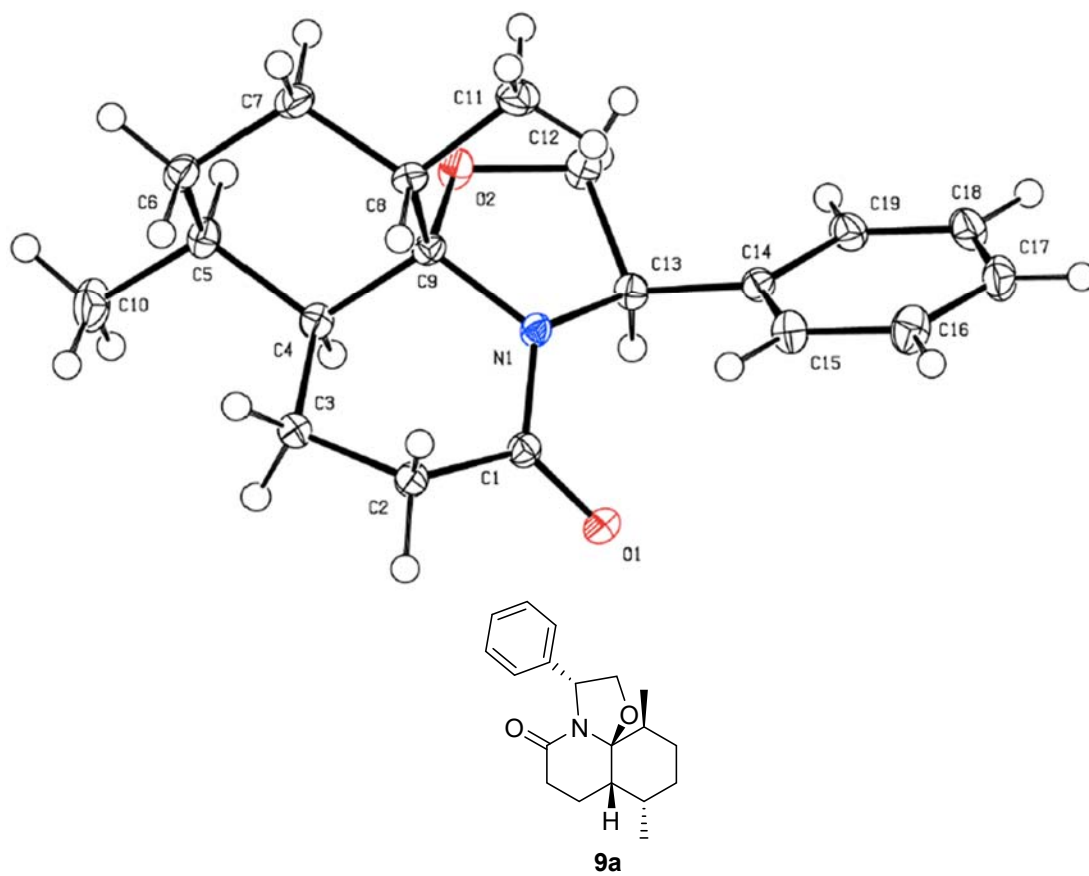

Table 1. Crystal data and structure refinement for **9a** (D59ZB54\_0m\_a).

|                                   |                                                  |                 |
|-----------------------------------|--------------------------------------------------|-----------------|
| Identification code               | D59ZB54_0m_a                                     |                 |
| Empirical formula                 | C <sub>19</sub> H <sub>25</sub> N O <sub>2</sub> |                 |
| Formula weight                    | 299.40                                           |                 |
| Temperature                       | 100(2) K                                         |                 |
| Wavelength                        | 0.71073 Å                                        |                 |
| Crystal system                    | Monoclinic                                       |                 |
| Space group                       | P 21                                             |                 |
| Unit cell dimensions              | a = 8.4807(5) Å                                  | α = 90°.        |
|                                   | b = 10.7621(5) Å                                 | β = 97.909(2)°. |
|                                   | c = 8.7322(4) Å                                  | γ = 90°.        |
| Volume                            | 789.41(7) Å <sup>3</sup>                         |                 |
| Z                                 | 2                                                |                 |
| Density (calculated)              | 1.260 Mg/m <sup>3</sup>                          |                 |
| Absorption coefficient            | 0.081 mm <sup>-1</sup>                           |                 |
| F(000)                            | 324                                              |                 |
| Crystal size                      | 0.350 x 0.200 x 0.120 mm <sup>3</sup>            |                 |
| Theta range for data collection   | 2.425 to 30.524°.                                |                 |
| Index ranges                      | -11 ≤ h ≤ 12, -15 ≤ k ≤ 15, -12 ≤ l ≤ 12         |                 |
| Reflections collected             | 12791                                            |                 |
| Independent reflections           | 4701 [R(int) = 0.0480]                           |                 |
| Completeness to theta = 25.242°   | 99.4 %                                           |                 |
| Absorption correction             | Semi-empirical from equivalents                  |                 |
| Max. and min. transmission        | 0.7461 and 0.6549                                |                 |
| Refinement method                 | Full-matrix least-squares on F <sup>2</sup>      |                 |
| Data / restraints / parameters    | 4701 / 1 / 201                                   |                 |
| Goodness-of-fit on F <sup>2</sup> | 1.029                                            |                 |
| Final R indices [I > 2σ(I)]       | R1 = 0.0431, wR2 = 0.0983                        |                 |
| R indices (all data)              | R1 = 0.0470, wR2 = 0.1010                        |                 |
| Absolute structure parameter      | 0.0(5)                                           |                 |
| Extinction coefficient            | n/a                                              |                 |
| Largest diff. peak and hole       | 0.294 and -0.218 e.Å <sup>-3</sup>               |                 |

Table 2. Atomic coordinates ( $\times 10^4$ ) and equivalent isotropic displacement parameters ( $\text{\AA}^2 \times 10^3$ ) for D59ZB54\_0m\_a.  $U(\text{eq})$  is defined as one third of the trace of the orthogonalized  $U^{ij}$  tensor.

|       | x       | y       | z       | $U(\text{eq})$ |
|-------|---------|---------|---------|----------------|
| O(1)  | 146(2)  | 6086(1) | 3421(2) | 20(1)          |
| O(2)  | 3801(2) | 3255(1) | 4945(2) | 17(1)          |
| N(1)  | 2355(2) | 5055(1) | 4524(2) | 14(1)          |
| C(1)  | 1570(2) | 5847(2) | 3459(2) | 15(1)          |
| C(2)  | 2611(2) | 6441(2) | 2396(2) | 18(1)          |
| C(3)  | 3603(2) | 5489(2) | 1618(2) | 19(1)          |
| C(4)  | 3898(2) | 4271(2) | 2534(2) | 15(1)          |
| C(5)  | 5453(2) | 3618(2) | 2255(2) | 17(1)          |
| C(6)  | 6900(2) | 4376(2) | 2940(2) | 18(1)          |
| C(7)  | 6889(2) | 4588(2) | 4665(2) | 18(1)          |
| C(8)  | 5345(2) | 5186(2) | 5041(2) | 14(1)          |
| C(9)  | 3882(2) | 4466(2) | 4273(2) | 13(1)          |
| C(10) | 5464(3) | 3326(2) | 542(3)  | 29(1)          |
| C(11) | 5410(2) | 5303(2) | 6793(2) | 21(1)          |
| C(12) | 2677(2) | 3252(2) | 6025(2) | 20(1)          |
| C(13) | 1460(2) | 4279(2) | 5485(2) | 15(1)          |
| C(14) | 838(2)  | 4933(2) | 6820(2) | 15(1)          |
| C(15) | 829(2)  | 6219(2) | 6988(2) | 18(1)          |
| C(16) | 139(3)  | 6758(2) | 8187(2) | 23(1)          |
| C(17) | -522(2) | 6026(2) | 9239(2) | 24(1)          |
| C(18) | -495(3) | 4743(2) | 9089(2) | 24(1)          |
| C(19) | 181(2)  | 4199(2) | 7893(2) | 19(1)          |

Table 3. Bond lengths [Å] and angles [°] for D59ZB54\_0m\_a.

---

|              |          |
|--------------|----------|
| O(1)-C(1)    | 1.231(2) |
| O(2)-C(12)   | 1.430(2) |
| O(2)-C(9)    | 1.435(2) |
| N(1)-C(1)    | 1.365(2) |
| N(1)-C(13)   | 1.468(2) |
| N(1)-C(9)    | 1.485(2) |
| C(1)-C(2)    | 1.508(3) |
| C(2)-C(3)    | 1.542(3) |
| C(2)-H(2A)   | 0.9900   |
| C(2)-H(2AB)  | 0.9900   |
| C(3)-C(4)    | 1.538(3) |
| C(3)-H(3A)   | 0.9900   |
| C(3)-H(3AB)  | 0.9900   |
| C(4)-C(9)    | 1.535(2) |
| C(4)-C(5)    | 1.544(3) |
| C(4)-H(4)    | 1.0000   |
| C(5)-C(6)    | 1.526(3) |
| C(5)-C(10)   | 1.530(3) |
| C(5)-H(5)    | 1.0000   |
| C(6)-C(7)    | 1.525(3) |
| C(6)-H(6A)   | 0.9900   |
| C(6)-H(6AB)  | 0.9900   |
| C(7)-C(8)    | 1.534(3) |
| C(7)-H(7A)   | 0.9900   |
| C(7)-H(7AB)  | 0.9900   |
| C(8)-C(11)   | 1.529(3) |
| C(8)-C(9)    | 1.536(2) |
| C(8)-H(8)    | 1.0000   |
| C(10)-H(10A) | 0.9800   |
| C(10)-H(10B) | 0.9800   |
| C(10)-H(10C) | 0.9800   |
| C(11)-H(11A) | 0.9800   |
| C(11)-H(11B) | 0.9800   |
| C(11)-H(11C) | 0.9800   |

|                   |            |
|-------------------|------------|
| C(12)-C(13)       | 1.540(3)   |
| C(12)-H(12A)      | 0.9900     |
| C(12)-H(12B)      | 0.9900     |
| C(13)-C(14)       | 1.517(3)   |
| C(13)-H(13)       | 1.0000     |
| C(14)-C(15)       | 1.391(3)   |
| C(14)-C(19)       | 1.399(3)   |
| C(15)-C(16)       | 1.395(3)   |
| C(15)-H(15)       | 0.9500     |
| C(16)-C(17)       | 1.386(3)   |
| C(16)-H(16)       | 0.9500     |
| C(17)-C(18)       | 1.387(3)   |
| C(17)-H(17)       | 0.9500     |
| C(18)-C(19)       | 1.388(3)   |
| C(18)-H(18)       | 0.9500     |
| C(19)-H(19)       | 0.9500     |
|                   |            |
| C(12)-O(2)-C(9)   | 110.21(14) |
| C(1)-N(1)-C(13)   | 120.20(15) |
| C(1)-N(1)-C(9)    | 121.32(15) |
| C(13)-N(1)-C(9)   | 111.81(14) |
| O(1)-C(1)-N(1)    | 122.25(18) |
| O(1)-C(1)-C(2)    | 123.36(17) |
| N(1)-C(1)-C(2)    | 114.33(16) |
| C(1)-C(2)-C(3)    | 112.98(16) |
| C(1)-C(2)-H(2A)   | 109.0      |
| C(3)-C(2)-H(2A)   | 109.0      |
| C(1)-C(2)-H(2AB)  | 109.0      |
| C(3)-C(2)-H(2AB)  | 109.0      |
| H(2A)-C(2)-H(2AB) | 107.8      |
| C(4)-C(3)-C(2)    | 113.36(15) |
| C(4)-C(3)-H(3A)   | 108.9      |
| C(2)-C(3)-H(3A)   | 108.9      |
| C(4)-C(3)-H(3AB)  | 108.9      |
| C(2)-C(3)-H(3AB)  | 108.9      |
| H(3A)-C(3)-H(3AB) | 107.7      |

|                   |            |
|-------------------|------------|
| C(9)-C(4)-C(3)    | 112.09(15) |
| C(9)-C(4)-C(5)    | 110.02(15) |
| C(3)-C(4)-C(5)    | 112.78(15) |
| C(9)-C(4)-H(4)    | 107.2      |
| C(3)-C(4)-H(4)    | 107.2      |
| C(5)-C(4)-H(4)    | 107.2      |
| C(6)-C(5)-C(10)   | 112.37(17) |
| C(6)-C(5)-C(4)    | 110.68(15) |
| C(10)-C(5)-C(4)   | 111.62(17) |
| C(6)-C(5)-H(5)    | 107.3      |
| C(10)-C(5)-H(5)   | 107.3      |
| C(4)-C(5)-H(5)    | 107.3      |
| C(7)-C(6)-C(5)    | 110.68(15) |
| C(7)-C(6)-H(6A)   | 109.5      |
| C(5)-C(6)-H(6A)   | 109.5      |
| C(7)-C(6)-H(6AB)  | 109.5      |
| C(5)-C(6)-H(6AB)  | 109.5      |
| H(6A)-C(6)-H(6AB) | 108.1      |
| C(6)-C(7)-C(8)    | 113.30(15) |
| C(6)-C(7)-H(7A)   | 108.9      |
| C(8)-C(7)-H(7A)   | 108.9      |
| C(6)-C(7)-H(7AB)  | 108.9      |
| C(8)-C(7)-H(7AB)  | 108.9      |
| H(7A)-C(7)-H(7AB) | 107.7      |
| C(11)-C(8)-C(7)   | 109.52(15) |
| C(11)-C(8)-C(9)   | 113.19(15) |
| C(7)-C(8)-C(9)    | 110.89(15) |
| C(11)-C(8)-H(8)   | 107.7      |
| C(7)-C(8)-H(8)    | 107.7      |
| C(9)-C(8)-H(8)    | 107.7      |
| O(2)-C(9)-N(1)    | 103.62(14) |
| O(2)-C(9)-C(4)    | 106.77(14) |
| N(1)-C(9)-C(4)    | 109.28(14) |
| O(2)-C(9)-C(8)    | 111.17(14) |
| N(1)-C(9)-C(8)    | 112.88(14) |
| C(4)-C(9)-C(8)    | 112.59(15) |

|                     |            |
|---------------------|------------|
| C(5)-C(10)-H(10A)   | 109.5      |
| C(5)-C(10)-H(10B)   | 109.5      |
| H(10A)-C(10)-H(10B) | 109.5      |
| C(5)-C(10)-H(10C)   | 109.5      |
| H(10A)-C(10)-H(10C) | 109.5      |
| H(10B)-C(10)-H(10C) | 109.5      |
| C(8)-C(11)-H(11A)   | 109.5      |
| C(8)-C(11)-H(11B)   | 109.5      |
| H(11A)-C(11)-H(11B) | 109.5      |
| C(8)-C(11)-H(11C)   | 109.5      |
| H(11A)-C(11)-H(11C) | 109.5      |
| H(11B)-C(11)-H(11C) | 109.5      |
| O(2)-C(12)-C(13)    | 106.02(15) |
| O(2)-C(12)-H(12A)   | 110.5      |
| C(13)-C(12)-H(12A)  | 110.5      |
| O(2)-C(12)-H(12B)   | 110.5      |
| C(13)-C(12)-H(12B)  | 110.5      |
| H(12A)-C(12)-H(12B) | 108.7      |
| N(1)-C(13)-C(14)    | 115.94(15) |
| N(1)-C(13)-C(12)    | 101.89(14) |
| C(14)-C(13)-C(12)   | 112.77(15) |
| N(1)-C(13)-H(13)    | 108.6      |
| C(14)-C(13)-H(13)   | 108.6      |
| C(12)-C(13)-H(13)   | 108.6      |
| C(15)-C(14)-C(19)   | 118.86(18) |
| C(15)-C(14)-C(13)   | 123.38(17) |
| C(19)-C(14)-C(13)   | 117.71(16) |
| C(14)-C(15)-C(16)   | 120.14(19) |
| C(14)-C(15)-H(15)   | 119.9      |
| C(16)-C(15)-H(15)   | 119.9      |
| C(17)-C(16)-C(15)   | 120.7(2)   |
| C(17)-C(16)-H(16)   | 119.7      |
| C(15)-C(16)-H(16)   | 119.7      |
| C(16)-C(17)-C(18)   | 119.3(2)   |
| C(16)-C(17)-H(17)   | 120.3      |
| C(18)-C(17)-H(17)   | 120.3      |

|                   |            |
|-------------------|------------|
| C(17)-C(18)-C(19) | 120.3(2)   |
| C(17)-C(18)-H(18) | 119.8      |
| C(19)-C(18)-H(18) | 119.8      |
| C(18)-C(19)-C(14) | 120.63(19) |
| C(18)-C(19)-H(19) | 119.7      |
| C(14)-C(19)-H(19) | 119.7      |

---

Symmetry transformations used to generate equivalent atoms:



Table 4. Anisotropic displacement parameters ( $\text{\AA}^2 \times 10^3$ ) for D59ZB54\_0m\_a. The anisotropic displacement factor exponent takes the form:  $-2\pi^2 [ h^2 a^{*2} U^{11} + \dots + 2 h k a^* b^* U^{12} ]$

|       | U <sup>11</sup> | U <sup>22</sup> | U <sup>33</sup> | U <sup>23</sup> | U <sup>13</sup> | U <sup>12</sup> |
|-------|-----------------|-----------------|-----------------|-----------------|-----------------|-----------------|
| O(1)  | 16(1)           | 26(1)           | 21(1)           | 3(1)            | 4(1)            | 6(1)            |
| O(2)  | 20(1)           | 10(1)           | 24(1)           | 4(1)            | 10(1)           | 2(1)            |
| N(1)  | 12(1)           | 13(1)           | 16(1)           | 2(1)            | 5(1)            | 0(1)            |
| C(1)  | 16(1)           | 14(1)           | 15(1)           | -1(1)           | 3(1)            | 1(1)            |
| C(2)  | 17(1)           | 19(1)           | 18(1)           | 6(1)            | 6(1)            | 4(1)            |
| C(3)  | 18(1)           | 24(1)           | 16(1)           | 4(1)            | 5(1)            | 5(1)            |
| C(4)  | 14(1)           | 16(1)           | 16(1)           | -2(1)           | 2(1)            | -1(1)           |
| C(5)  | 18(1)           | 16(1)           | 20(1)           | -2(1)           | 6(1)            | 1(1)            |
| C(6)  | 15(1)           | 18(1)           | 22(1)           | 3(1)            | 5(1)            | 2(1)            |
| C(7)  | 13(1)           | 19(1)           | 21(1)           | 3(1)            | 1(1)            | 1(1)            |
| C(8)  | 13(1)           | 12(1)           | 16(1)           | 1(1)            | 0(1)            | 0(1)            |
| C(9)  | 12(1)           | 11(1)           | 16(1)           | 1(1)            | 2(1)            | 1(1)            |
| C(10) | 29(1)           | 34(1)           | 26(1)           | -10(1)          | 10(1)           | 2(1)            |
| C(11) | 22(1)           | 21(1)           | 18(1)           | -2(1)           | -2(1)           | 2(1)            |
| C(12) | 22(1)           | 14(1)           | 26(1)           | 5(1)            | 10(1)           | 3(1)            |
| C(13) | 16(1)           | 13(1)           | 17(1)           | 1(1)            | 4(1)            | -2(1)           |
| C(14) | 12(1)           | 18(1)           | 14(1)           | 0(1)            | 2(1)            | -1(1)           |
| C(15) | 20(1)           | 17(1)           | 19(1)           | -2(1)           | 5(1)            | -4(1)           |
| C(16) | 22(1)           | 22(1)           | 25(1)           | -8(1)           | 6(1)            | -2(1)           |
| C(17) | 19(1)           | 35(1)           | 17(1)           | -6(1)           | 5(1)            | -1(1)           |
| C(18) | 22(1)           | 33(1)           | 17(1)           | 4(1)            | 6(1)            | -1(1)           |
| C(19) | 19(1)           | 21(1)           | 18(1)           | 4(1)            | 4(1)            | -1(1)           |

Table 5. Hydrogen coordinates ( $\times 10^4$ ) and isotropic displacement parameters ( $\text{\AA}^2 \times 10^{-3}$ ) for D59ZB54\_0m\_a.

|        | x    | y    | z     | U(eq) |
|--------|------|------|-------|-------|
| H(2A)  | 3340 | 7038 | 2996  | 21    |
| H(2AB) | 1931 | 6913 | 1585  | 21    |
| H(3A)  | 3044 | 5296 | 574   | 23    |
| H(3AB) | 4642 | 5866 | 1492  | 23    |
| H(4)   | 3000 | 3696 | 2162  | 18    |
| H(5)   | 5501 | 2807 | 2819  | 21    |
| H(6A)  | 7885 | 3931 | 2777  | 21    |
| H(6AB) | 6893 | 5188 | 2405  | 21    |
| H(7A)  | 7798 | 5129 | 5063  | 22    |
| H(7AB) | 7040 | 3780 | 5208  | 22    |
| H(8)   | 5286 | 6045 | 4599  | 17    |
| H(10A) | 4504 | 2856 | 147   | 43    |
| H(10B) | 6409 | 2831 | 419   | 43    |
| H(10C) | 5486 | 4104 | -39   | 43    |
| H(11A) | 6229 | 5908 | 7188  | 31    |
| H(11B) | 5669 | 4493 | 7276  | 31    |
| H(11C) | 4373 | 5582 | 7037  | 31    |
| H(12A) | 3215 | 3429 | 7082  | 24    |
| H(12B) | 2142 | 2435 | 6029  | 24    |
| H(13)  | 541  | 3895 | 4810  | 18    |
| H(15)  | 1294 | 6730 | 6284  | 22    |
| H(16)  | 121  | 7637 | 8284  | 28    |
| H(17)  | -988 | 6398 | 10055 | 28    |
| H(18)  | -942 | 4234 | 9807  | 29    |
| H(19)  | 198  | 3319 | 7802  | 23    |

|     |      |     |     |     |     |   |
|-----|------|-----|-----|-----|-----|---|
| C4  | - C3 | C5  | C9  | H4  | sp3 | S |
| C5  | - C4 | C6  | C10 | H5  | sp3 | S |
| C8  | - C7 | C9  | C11 | H8  | sp3 | S |
| C9  | - O2 | N1  | C4  | C8  | sp3 | S |
| C13 | - N1 | C12 | C14 | H13 | sp3 | R |



Table 1. Crystal data and structure refinement for **9b** (D59ZB89\_0m).

|                                   |                                                  |          |
|-----------------------------------|--------------------------------------------------|----------|
| Identification code               | d59zb89_0m                                       |          |
| Empirical formula                 | C <sub>19</sub> H <sub>25</sub> N O <sub>2</sub> |          |
| Formula weight                    | 299.40                                           |          |
| Temperature                       | 100(2) K                                         |          |
| Wavelength                        | 0.71073 Å                                        |          |
| Crystal system                    | Orthorhombic                                     |          |
| Space group                       | P 21 21 21                                       |          |
| Unit cell dimensions              | a = 8.2337(3) Å                                  | α = 90°. |
|                                   | b = 12.0198(3) Å                                 | β = 90°. |
|                                   | c = 15.9765(5) Å                                 | γ = 90°. |
| Volume                            | 1581.15(9) Å <sup>3</sup>                        |          |
| Z                                 | 4                                                |          |
| Density (calculated)              | 1.258 Mg/m <sup>3</sup>                          |          |
| Absorption coefficient            | 0.081 mm <sup>-1</sup>                           |          |
| F(000)                            | 648                                              |          |
| Crystal size                      | 0.300 x 0.260 x 0.150 mm <sup>3</sup>            |          |
| Theta range for data collection   | 4.185 to 30.522°.                                |          |
| Index ranges                      | -11 ≤ h ≤ 10, -12 ≤ k ≤ 17, -22 ≤ l ≤ 17         |          |
| Reflections collected             | 15601                                            |          |
| Independent reflections           | 4717 [R(int) = 0.0285]                           |          |
| Completeness to theta = 25.242°   | 97.9 %                                           |          |
| Absorption correction             | Semi-empirical from equivalents                  |          |
| Max. and min. transmission        | 0.7461 and 0.6604                                |          |
| Refinement method                 | Full-matrix least-squares on F <sup>2</sup>      |          |
| Data / restraints / parameters    | 4717 / 0 / 201                                   |          |
| Goodness-of-fit on F <sup>2</sup> | 1.063                                            |          |
| Final R indices [I > 2σ(I)]       | R1 = 0.0350, wR2 = 0.0918                        |          |
| R indices (all data)              | R1 = 0.0375, wR2 = 0.0943                        |          |
| Absolute structure parameter      | 0.0(3)                                           |          |
| Extinction coefficient            | n/a                                              |          |
| Largest diff. peak and hole       | 0.352 and -0.196 e.Å <sup>-3</sup>               |          |

Table 2. Atomic coordinates ( $\times 10^4$ ) and equivalent isotropic displacement parameters ( $\text{\AA}^2 \times 10^3$ ) for D59ZB89\_0m.  $U(\text{eq})$  is defined as one third of the trace of the orthogonalized  $U^{ij}$  tensor.

|       | x       | y       | z       | $U(\text{eq})$ |
|-------|---------|---------|---------|----------------|
| O(1)  | 3782(1) | 6671(1) | 4561(1) | 21(1)          |
| O(2)  | 5037(1) | 5387(1) | 7129(1) | 14(1)          |
| N(1)  | 4219(1) | 6144(1) | 5899(1) | 14(1)          |
| C(1)  | 3247(2) | 6308(1) | 5225(1) | 16(1)          |
| C(2)  | 1483(2) | 5989(2) | 5319(1) | 27(1)          |
| C(3)  | 936(2)  | 5357(1) | 6102(1) | 20(1)          |
| C(4)  | 2326(2) | 4941(1) | 6667(1) | 14(1)          |
| C(5)  | 1766(2) | 4566(1) | 7543(1) | 17(1)          |
| C(6)  | 1154(2) | 5549(1) | 8063(1) | 19(1)          |
| C(7)  | 2420(2) | 6485(1) | 8101(1) | 18(1)          |
| C(8)  | 2984(2) | 6859(1) | 7225(1) | 14(1)          |
| C(9)  | 3628(2) | 5844(1) | 6737(1) | 12(1)          |
| C(10) | 6461(2) | 5846(1) | 6745(1) | 16(1)          |
| C(11) | 5998(2) | 6094(1) | 5831(1) | 14(1)          |
| C(12) | 6560(2) | 5194(1) | 5233(1) | 16(1)          |
| C(13) | 7538(2) | 5460(1) | 4553(1) | 18(1)          |
| C(14) | 8144(2) | 4630(1) | 4029(1) | 22(1)          |
| C(15) | 7756(2) | 3525(1) | 4179(1) | 26(1)          |
| C(16) | 6755(2) | 3250(1) | 4850(1) | 29(1)          |
| C(17) | 6165(2) | 4077(1) | 5373(1) | 24(1)          |
| C(18) | 503(2)  | 3637(1) | 7505(1) | 23(1)          |
| C(19) | 4179(2) | 7824(1) | 7291(1) | 19(1)          |

Table 3. Bond lengths [Å] and angles [°] for D59ZB89\_0m.

---

|              |            |
|--------------|------------|
| O(1)-C(1)    | 1.2291(18) |
| O(2)-C(9)    | 1.4281(15) |
| O(2)-C(10)   | 1.4341(16) |
| N(1)-C(1)    | 1.3556(18) |
| N(1)-C(11)   | 1.4699(17) |
| N(1)-C(9)    | 1.4703(17) |
| C(1)-C(2)    | 1.509(2)   |
| C(2)-C(3)    | 1.532(2)   |
| C(2)-H(2A)   | 0.9900     |
| C(2)-H(2B)   | 0.9900     |
| C(3)-C(4)    | 1.541(2)   |
| C(3)-H(3A)   | 0.9900     |
| C(3)-H(3B)   | 0.9900     |
| C(4)-C(9)    | 1.5294(18) |
| C(4)-C(5)    | 1.542(2)   |
| C(4)-H(4)    | 1.0000     |
| C(5)-C(18)   | 1.526(2)   |
| C(5)-C(6)    | 1.529(2)   |
| C(5)-H(5)    | 1.0000     |
| C(6)-C(7)    | 1.535(2)   |
| C(6)-H(6A)   | 0.9900     |
| C(6)-H(6B)   | 0.9900     |
| C(7)-C(8)    | 1.541(2)   |
| C(7)-H(7A)   | 0.9900     |
| C(7)-H(7B)   | 0.9900     |
| C(8)-C(19)   | 1.5246(19) |
| C(8)-C(9)    | 1.5413(18) |
| C(8)-H(8)    | 1.0000     |
| C(10)-C(11)  | 1.5389(19) |
| C(10)-H(10A) | 0.9900     |
| C(10)-H(10B) | 0.9900     |
| C(11)-C(12)  | 1.5162(19) |
| C(11)-H(11)  | 1.0000     |
| C(12)-C(13)  | 1.3899(19) |

|                  |            |
|------------------|------------|
| C(12)-C(17)      | 1.399(2)   |
| C(13)-C(14)      | 1.394(2)   |
| C(13)-H(13)      | 0.9500     |
| C(14)-C(15)      | 1.386(2)   |
| C(14)-H(14)      | 0.9500     |
| C(15)-C(16)      | 1.393(2)   |
| C(15)-H(15)      | 0.9500     |
| C(16)-C(17)      | 1.386(2)   |
| C(16)-H(16)      | 0.9500     |
| C(17)-H(17)      | 0.9500     |
| C(18)-H(18A)     | 0.9800     |
| C(18)-H(18B)     | 0.9800     |
| C(18)-H(18C)     | 0.9800     |
| C(19)-H(19A)     | 0.9800     |
| C(19)-H(19B)     | 0.9800     |
| C(19)-H(19C)     | 0.9800     |
|                  |            |
| C(9)-O(2)-C(10)  | 109.18(9)  |
| C(1)-N(1)-C(11)  | 122.39(12) |
| C(1)-N(1)-C(9)   | 124.29(11) |
| C(11)-N(1)-C(9)  | 112.78(11) |
| O(1)-C(1)-N(1)   | 121.70(13) |
| O(1)-C(1)-C(2)   | 121.36(13) |
| N(1)-C(1)-C(2)   | 116.91(12) |
| C(1)-C(2)-C(3)   | 119.35(13) |
| C(1)-C(2)-H(2A)  | 107.5      |
| C(3)-C(2)-H(2A)  | 107.5      |
| C(1)-C(2)-H(2B)  | 107.5      |
| C(3)-C(2)-H(2B)  | 107.5      |
| H(2A)-C(2)-H(2B) | 107.0      |
| C(2)-C(3)-C(4)   | 114.87(12) |
| C(2)-C(3)-H(3A)  | 108.6      |
| C(4)-C(3)-H(3A)  | 108.6      |
| C(2)-C(3)-H(3B)  | 108.6      |
| C(4)-C(3)-H(3B)  | 108.6      |
| H(3A)-C(3)-H(3B) | 107.5      |



|                  |            |
|------------------|------------|
| C(9)-C(4)-C(3)   | 109.47(11) |
| C(9)-C(4)-C(5)   | 110.50(11) |
| C(3)-C(4)-C(5)   | 113.83(11) |
| C(9)-C(4)-H(4)   | 107.6      |
| C(3)-C(4)-H(4)   | 107.6      |
| C(5)-C(4)-H(4)   | 107.6      |
| C(18)-C(5)-C(6)  | 111.25(12) |
| C(18)-C(5)-C(4)  | 112.42(12) |
| C(6)-C(5)-C(4)   | 111.43(11) |
| C(18)-C(5)-H(5)  | 107.1      |
| C(6)-C(5)-H(5)   | 107.1      |
| C(4)-C(5)-H(5)   | 107.1      |
| C(5)-C(6)-C(7)   | 111.34(11) |
| C(5)-C(6)-H(6A)  | 109.4      |
| C(7)-C(6)-H(6A)  | 109.4      |
| C(5)-C(6)-H(6B)  | 109.4      |
| C(7)-C(6)-H(6B)  | 109.4      |
| H(6A)-C(6)-H(6B) | 108.0      |
| C(6)-C(7)-C(8)   | 112.48(11) |
| C(6)-C(7)-H(7A)  | 109.1      |
| C(8)-C(7)-H(7A)  | 109.1      |
| C(6)-C(7)-H(7B)  | 109.1      |
| C(8)-C(7)-H(7B)  | 109.1      |
| H(7A)-C(7)-H(7B) | 107.8      |
| C(19)-C(8)-C(9)  | 114.55(11) |
| C(19)-C(8)-C(7)  | 110.72(12) |
| C(9)-C(8)-C(7)   | 109.38(11) |
| C(19)-C(8)-H(8)  | 107.3      |
| C(9)-C(8)-H(8)   | 107.3      |
| C(7)-C(8)-H(8)   | 107.3      |
| O(2)-C(9)-N(1)   | 103.01(10) |
| O(2)-C(9)-C(4)   | 109.17(10) |
| N(1)-C(9)-C(4)   | 109.83(11) |
| O(2)-C(9)-C(8)   | 111.22(10) |
| N(1)-C(9)-C(8)   | 112.32(10) |
| C(4)-C(9)-C(8)   | 110.99(10) |

|                     |            |
|---------------------|------------|
| O(2)-C(10)-C(11)    | 106.15(10) |
| O(2)-C(10)-H(10A)   | 110.5      |
| C(11)-C(10)-H(10A)  | 110.5      |
| O(2)-C(10)-H(10B)   | 110.5      |
| C(11)-C(10)-H(10B)  | 110.5      |
| H(10A)-C(10)-H(10B) | 108.7      |
| N(1)-C(11)-C(12)    | 112.34(11) |
| N(1)-C(11)-C(10)    | 100.64(11) |
| C(12)-C(11)-C(10)   | 112.62(11) |
| N(1)-C(11)-H(11)    | 110.3      |
| C(12)-C(11)-H(11)   | 110.3      |
| C(10)-C(11)-H(11)   | 110.3      |
| C(13)-C(12)-C(17)   | 118.76(13) |
| C(13)-C(12)-C(11)   | 120.33(13) |
| C(17)-C(12)-C(11)   | 120.86(13) |
| C(12)-C(13)-C(14)   | 120.70(14) |
| C(12)-C(13)-H(13)   | 119.6      |
| C(14)-C(13)-H(13)   | 119.6      |
| C(15)-C(14)-C(13)   | 120.03(14) |
| C(15)-C(14)-H(14)   | 120.0      |
| C(13)-C(14)-H(14)   | 120.0      |
| C(14)-C(15)-C(16)   | 119.75(15) |
| C(14)-C(15)-H(15)   | 120.1      |
| C(16)-C(15)-H(15)   | 120.1      |
| C(17)-C(16)-C(15)   | 120.07(15) |
| C(17)-C(16)-H(16)   | 120.0      |
| C(15)-C(16)-H(16)   | 120.0      |
| C(16)-C(17)-C(12)   | 120.68(15) |
| C(16)-C(17)-H(17)   | 119.7      |
| C(12)-C(17)-H(17)   | 119.7      |
| C(5)-C(18)-H(18A)   | 109.5      |
| C(5)-C(18)-H(18B)   | 109.5      |
| H(18A)-C(18)-H(18B) | 109.5      |
| C(5)-C(18)-H(18C)   | 109.5      |
| H(18A)-C(18)-H(18C) | 109.5      |
| H(18B)-C(18)-H(18C) | 109.5      |

|                     |       |
|---------------------|-------|
| C(8)-C(19)-H(19A)   | 109.5 |
| C(8)-C(19)-H(19B)   | 109.5 |
| H(19A)-C(19)-H(19B) | 109.5 |
| C(8)-C(19)-H(19C)   | 109.5 |
| H(19A)-C(19)-H(19C) | 109.5 |
| H(19B)-C(19)-H(19C) | 109.5 |

---

Symmetry transformations used to generate equivalent atoms:

Table 4. Anisotropic displacement parameters ( $\text{\AA}^2 \times 10^3$ ) for D59ZB89\_0m. The anisotropic displacement factor exponent takes the form:  $-2\pi^2 [ h^2 a^{*2} U^{11} + \dots + 2 h k a^* b^* U^{12} ]$

|       | U <sup>11</sup> | U <sup>22</sup> | U <sup>33</sup> | U <sup>23</sup> | U <sup>13</sup> | U <sup>12</sup> |
|-------|-----------------|-----------------|-----------------|-----------------|-----------------|-----------------|
| O(1)  | 21(1)           | 26(1)           | 15(1)           | 5(1)            | 0(1)            | 2(1)            |
| O(2)  | 9(1)            | 17(1)           | 14(1)           | 3(1)            | -1(1)           | 1(1)            |
| N(1)  | 11(1)           | 16(1)           | 13(1)           | 1(1)            | 1(1)            | 1(1)            |
| C(1)  | 16(1)           | 16(1)           | 15(1)           | 1(1)            | -1(1)           | 2(1)            |
| C(2)  | 15(1)           | 42(1)           | 24(1)           | 12(1)           | -5(1)           | -3(1)           |
| C(3)  | 14(1)           | 24(1)           | 21(1)           | 2(1)            | -3(1)           | -3(1)           |
| C(4)  | 12(1)           | 13(1)           | 15(1)           | 0(1)            | 0(1)            | -1(1)           |
| C(5)  | 14(1)           | 17(1)           | 19(1)           | 2(1)            | 1(1)            | -2(1)           |
| C(6)  | 17(1)           | 22(1)           | 20(1)           | 1(1)            | 4(1)            | 0(1)            |
| C(7)  | 19(1)           | 18(1)           | 16(1)           | -2(1)           | 2(1)            | 2(1)            |
| C(8)  | 14(1)           | 12(1)           | 15(1)           | -1(1)           | 0(1)            | 1(1)            |
| C(9)  | 10(1)           | 13(1)           | 12(1)           | 1(1)            | 0(1)            | 1(1)            |
| C(10) | 10(1)           | 21(1)           | 16(1)           | 1(1)            | 0(1)            | -1(1)           |
| C(11) | 12(1)           | 16(1)           | 15(1)           | 2(1)            | 1(1)            | 0(1)            |
| C(12) | 13(1)           | 18(1)           | 16(1)           | 1(1)            | 1(1)            | 2(1)            |
| C(13) | 14(1)           | 22(1)           | 18(1)           | 2(1)            | 1(1)            | 0(1)            |
| C(14) | 18(1)           | 31(1)           | 17(1)           | -1(1)           | 3(1)            | 3(1)            |
| C(15) | 27(1)           | 28(1)           | 22(1)           | -5(1)           | 3(1)            | 7(1)            |
| C(16) | 37(1)           | 19(1)           | 30(1)           | -2(1)           | 9(1)            | 3(1)            |
| C(17) | 28(1)           | 19(1)           | 23(1)           | 1(1)            | 10(1)           | 1(1)            |
| C(18) | 20(1)           | 23(1)           | 26(1)           | 5(1)            | 0(1)            | -9(1)           |
| C(19) | 20(1)           | 14(1)           | 22(1)           | -2(1)           | -2(1)           | -2(1)           |

Table 5. Hydrogen coordinates ( $\times 10^4$ ) and isotropic displacement parameters ( $\text{\AA}^2 \times 10^{-3}$ ) for D59ZB89\_0m.

|        | x    | y    | z    | U(eq) |
|--------|------|------|------|-------|
| H(2A)  | 1186 | 5532 | 4827 | 32    |
| H(2B)  | 834  | 6681 | 5287 | 32    |
| H(3A)  | 278  | 4709 | 5925 | 24    |
| H(3B)  | 224  | 5850 | 6436 | 24    |
| H(4)   | 2832 | 4284 | 6385 | 16    |
| H(5)   | 2739 | 4258 | 7837 | 20    |
| H(6A)  | 904  | 5293 | 8637 | 23    |
| H(6B)  | 138  | 5839 | 7812 | 23    |
| H(7A)  | 3373 | 6224 | 8424 | 21    |
| H(7B)  | 1949 | 7130 | 8400 | 21    |
| H(8)   | 2006 | 7139 | 6920 | 16    |
| H(10A) | 7370 | 5308 | 6769 | 19    |
| H(10B) | 6795 | 6537 | 7035 | 19    |
| H(11)  | 6440 | 6833 | 5656 | 17    |
| H(13)  | 7797 | 6217 | 4443 | 22    |
| H(14)  | 8822 | 4821 | 3570 | 26    |
| H(15)  | 8171 | 2958 | 3824 | 31    |
| H(16)  | 6476 | 2494 | 4950 | 34    |
| H(17)  | 5486 | 3884 | 5831 | 28    |
| H(18A) | 272  | 3372 | 8073 | 35    |
| H(18B) | 925  | 3021 | 7167 | 35    |
| H(18C) | -497 | 3922 | 7251 | 35    |
| H(19A) | 5061 | 7623 | 7673 | 28    |
| H(19B) | 3614 | 8483 | 7505 | 28    |
| H(19C) | 4628 | 7987 | 6736 | 28    |

Table 6. Torsion angles [°] for D59ZB89\_0m.

---

|                      |             |
|----------------------|-------------|
| C(11)-N(1)-C(1)-O(1) | -16.8(2)    |
| C(9)-N(1)-C(1)-O(1)  | 172.30(12)  |
| C(11)-N(1)-C(1)-C(2) | 161.24(14)  |
| C(9)-N(1)-C(1)-C(2)  | -9.7(2)     |
| O(1)-C(1)-C(2)-C(3)  | 169.44(14)  |
| N(1)-C(1)-C(2)-C(3)  | -8.6(2)     |
| C(1)-C(2)-C(3)-C(4)  | -9.3(2)     |
| C(2)-C(3)-C(4)-C(9)  | 41.75(17)   |
| C(2)-C(3)-C(4)-C(5)  | 165.97(13)  |
| C(9)-C(4)-C(5)-C(18) | -178.17(12) |
| C(3)-C(4)-C(5)-C(18) | 58.16(16)   |
| C(9)-C(4)-C(5)-C(6)  | 56.16(14)   |
| C(3)-C(4)-C(5)-C(6)  | -67.50(15)  |
| C(18)-C(5)-C(6)-C(7) | -179.91(12) |
| C(4)-C(5)-C(6)-C(7)  | -53.61(16)  |
| C(5)-C(6)-C(7)-C(8)  | 54.03(16)   |
| C(6)-C(7)-C(8)-C(19) | 177.31(11)  |
| C(6)-C(7)-C(8)-C(9)  | -55.53(14)  |
| C(10)-O(2)-C(9)-N(1) | 25.72(12)   |
| C(10)-O(2)-C(9)-C(4) | 142.40(11)  |
| C(10)-O(2)-C(9)-C(8) | -94.80(12)  |
| C(1)-N(1)-C(9)-O(2)  | 160.07(11)  |
| C(11)-N(1)-C(9)-O(2) | -11.63(14)  |
| C(1)-N(1)-C(9)-C(4)  | 43.87(16)   |
| C(11)-N(1)-C(9)-C(4) | -127.84(12) |
| C(1)-N(1)-C(9)-C(8)  | -80.16(15)  |
| C(11)-N(1)-C(9)-C(8) | 108.13(12)  |
| C(3)-C(4)-C(9)-O(2)  | -169.48(11) |
| C(5)-C(4)-C(9)-O(2)  | 64.38(13)   |
| C(3)-C(4)-C(9)-N(1)  | -57.22(14)  |
| C(5)-C(4)-C(9)-N(1)  | 176.63(10)  |
| C(3)-C(4)-C(9)-C(8)  | 67.58(14)   |
| C(5)-C(4)-C(9)-C(8)  | -58.56(14)  |
| C(19)-C(8)-C(9)-O(2) | 60.96(15)   |

|                         |             |
|-------------------------|-------------|
| C(7)-C(8)-C(9)-O(2)     | -64.00(13)  |
| C(19)-C(8)-C(9)-N(1)    | -53.90(15)  |
| C(7)-C(8)-C(9)-N(1)     | -178.86(11) |
| C(19)-C(8)-C(9)-C(4)    | -177.29(12) |
| C(7)-C(8)-C(9)-C(4)     | 57.75(14)   |
| C(9)-O(2)-C(10)-C(11)   | -30.31(13)  |
| C(1)-N(1)-C(11)-C(12)   | -57.46(17)  |
| C(9)-N(1)-C(11)-C(12)   | 114.43(12)  |
| C(1)-N(1)-C(11)-C(10)   | -177.48(11) |
| C(9)-N(1)-C(11)-C(10)   | -5.59(14)   |
| O(2)-C(10)-C(11)-N(1)   | 20.90(13)   |
| O(2)-C(10)-C(11)-C(12)  | -98.91(12)  |
| N(1)-C(11)-C(12)-C(13)  | 122.92(14)  |
| C(10)-C(11)-C(12)-C(13) | -124.29(14) |
| N(1)-C(11)-C(12)-C(17)  | -59.87(18)  |
| C(10)-C(11)-C(12)-C(17) | 52.93(18)   |
| C(17)-C(12)-C(13)-C(14) | -1.3(2)     |
| C(11)-C(12)-C(13)-C(14) | 175.98(13)  |
| C(12)-C(13)-C(14)-C(15) | 0.8(2)      |
| C(13)-C(14)-C(15)-C(16) | 0.3(2)      |
| C(14)-C(15)-C(16)-C(17) | -0.8(3)     |
| C(15)-C(16)-C(17)-C(12) | 0.2(3)      |
| C(13)-C(12)-C(17)-C(16) | 0.8(2)      |
| C(11)-C(12)-C(17)-C(16) | -176.46(15) |

---

Symmetry transformations used to generate equivalent atoms:

C(4) - C(3) C(5) C(9) H(4) sp3 R  
C(5) - C(4) C(6) C(18) H(5) sp3 R  
C(8) - C(7) C(9) C(19) H(8) sp3 R  
C(9) - O(2) N(1) C(4) C(8) sp3 R  
C(11) - N(1) C(10) C(12) H(11) sp3 R



Crystallographic data for compound **9c**:

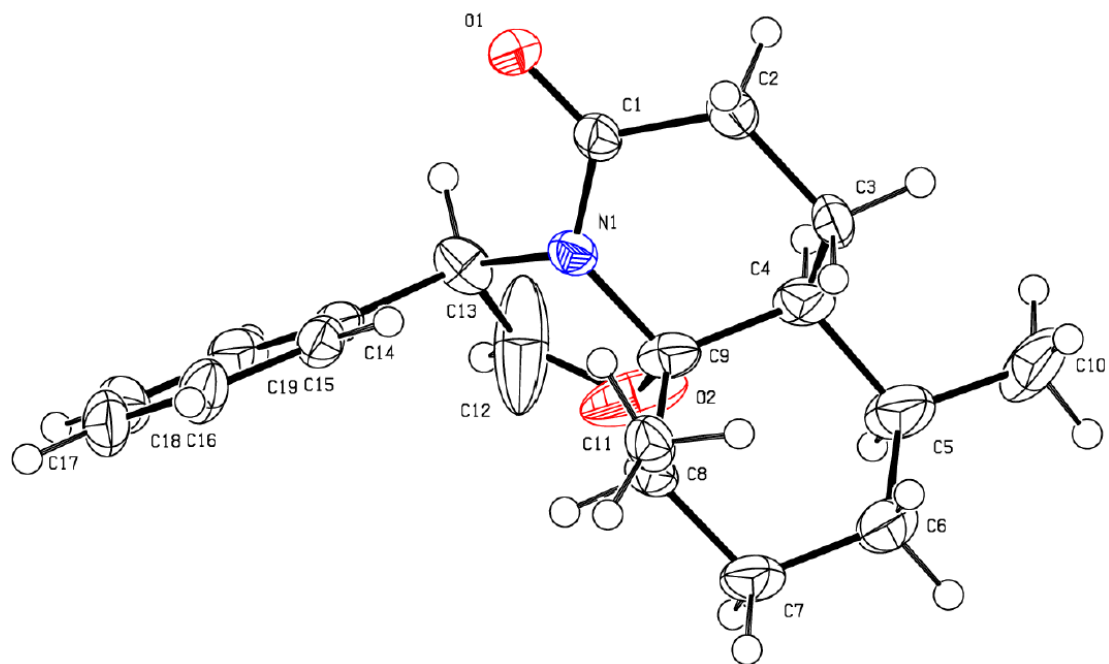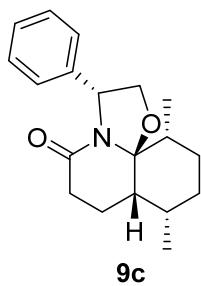

Table 1. Crystal data and structure refinement for **9c** (D59ZB65\_0m\_a).

|                                   |                                                  |                  |
|-----------------------------------|--------------------------------------------------|------------------|
| Identification code               | D59ZB65_0m_a                                     |                  |
| Empirical formula                 | C <sub>19</sub> H <sub>24</sub> N O <sub>2</sub> |                  |
| Formula weight                    | 298.39                                           |                  |
| Temperature                       | 100(2) K                                         |                  |
| Wavelength                        | 0.71073 Å                                        |                  |
| Crystal system                    | Monoclinic                                       |                  |
| Space group                       | C 2                                              |                  |
| Unit cell dimensions              | a = 23.3675(16) Å                                | α = 90°.         |
|                                   | b = 6.3104(4) Å                                  | β = 113.927(2)°. |
|                                   | c = 11.8556(8) Å                                 | γ = 90°.         |
| Volume                            | 1597.97(19) Å <sup>3</sup>                       |                  |
| Z                                 | 4                                                |                  |
| Density (calculated)              | 1.240 Mg/m <sup>3</sup>                          |                  |
| Absorption coefficient            | 0.080 mm <sup>-1</sup>                           |                  |
| F(000)                            | 644                                              |                  |
| Crystal size                      | 0.350 x 0.200 x 0.150 mm <sup>3</sup>            |                  |
| Theta range for data collection   | 3.458 to 26.398°.                                |                  |
| Index ranges                      | -29 ≤ h ≤ 29, -7 ≤ k ≤ 7, -14 ≤ l ≤ 14           |                  |
| Reflections collected             | 10863                                            |                  |
| Independent reflections           | 3131 [R(int) = 0.0240]                           |                  |
| Completeness to theta = 25.242°   | 98.9 %                                           |                  |
| Absorption correction             | Semi-empirical from equivalents                  |                  |
| Max. and min. transmission        | 0.7454 and 0.6953                                |                  |
| Refinement method                 | Full-matrix least-squares on F <sup>2</sup>      |                  |
| Data / restraints / parameters    | 3131 / 1 / 201                                   |                  |
| Goodness-of-fit on F <sup>2</sup> | 1.026                                            |                  |
| Final R indices [I > 2σ(I)]       | R1 = 0.0641, wR2 = 0.1406                        |                  |
| R indices (all data)              | R1 = 0.0683, wR2 = 0.1441                        |                  |
| Absolute structure parameter      | 0.0(4)                                           |                  |
| Extinction coefficient            | n/a                                              |                  |
| Largest diff. peak and hole       | 0.689 and -0.507 e.Å <sup>-3</sup>               |                  |

Table 2. Atomic coordinates ( $\times 10^4$ ) and equivalent isotropic displacement parameters ( $\text{\AA}^2 \times 10^3$ ) for D59ZB65\_0m\_a.  $U(\text{eq})$  is defined as one third of the trace of the orthogonalized  $U^{ij}$  tensor.

|       | x       | y        | z        | $U(\text{eq})$ |
|-------|---------|----------|----------|----------------|
| O(1)  | 7498(1) | 7842(5)  | 8310(2)  | 33(1)          |
| O(2)  | 6360(2) | 2084(6)  | 7154(4)  | 66(1)          |
| N(1)  | 6714(1) | 5483(5)  | 7516(3)  | 26(1)          |
| C(1)  | 7055(2) | 6912(7)  | 8382(3)  | 26(1)          |
| C(2)  | 6890(2) | 7283(8)  | 9476(3)  | 36(1)          |
| C(3)  | 6357(2) | 5910(9)  | 9541(4)  | 45(1)          |
| C(4)  | 6305(2) | 3784(8)  | 8907(4)  | 42(1)          |
| C(5)  | 5798(2) | 2217(10) | 8933(5)  | 57(2)          |
| C(6)  | 5137(2) | 2998(11) | 8082(4)  | 54(1)          |
| C(7)  | 5072(2) | 3225(9)  | 6784(4)  | 41(1)          |
| C(8)  | 5561(2) | 4768(7)  | 6682(3)  | 30(1)          |
| C(9)  | 6226(2) | 4071(7)  | 7592(4)  | 33(1)          |
| C(10) | 5871(2) | 1730(11) | 10196(5) | 71(2)          |
| C(11) | 5388(2) | 7080(8)  | 6776(3)  | 33(1)          |
| C(12) | 6793(5) | 2270(10) | 6692(7)  | 97(3)          |
| C(13) | 6978(2) | 4523(7)  | 6708(4)  | 33(1)          |
| C(14) | 6771(2) | 5498(7)  | 5425(3)  | 26(1)          |
| C(15) | 6437(2) | 7378(7)  | 5101(3)  | 29(1)          |
| C(16) | 6274(2) | 8227(8)  | 3921(4)  | 38(1)          |
| C(17) | 6432(2) | 7162(10) | 3071(4)  | 47(1)          |
| C(18) | 6761(2) | 5293(9)  | 3383(4)  | 42(1)          |
| C(19) | 6936(2) | 4465(7)  | 4555(4)  | 35(1)          |

Table 3. Bond lengths [Å] and angles [°] for D59ZB65\_0m\_a.

---

|              |          |
|--------------|----------|
| O(1)-C(1)    | 1.223(5) |
| O(2)-C(12)   | 1.337(7) |
| O(2)-C(9)    | 1.439(5) |
| N(1)-C(1)    | 1.356(5) |
| N(1)-C(13)   | 1.464(5) |
| N(1)-C(9)    | 1.478(5) |
| C(1)-C(2)    | 1.513(5) |
| C(2)-C(3)    | 1.545(6) |
| C(2)-H(2A)   | 0.9900   |
| C(2)-H(2AB)  | 0.9900   |
| C(3)-C(4)    | 1.518(8) |
| C(3)-H(3A)   | 0.9900   |
| C(3)-H(3AB)  | 0.9900   |
| C(4)-C(9)    | 1.505(6) |
| C(4)-C(5)    | 1.553(6) |
| C(4)-H(4)    | 1.0000   |
| C(5)-C(10)   | 1.468(7) |
| C(5)-C(6)    | 1.543(6) |
| C(5)-H(5)    | 1.0000   |
| C(6)-C(7)    | 1.491(6) |
| C(6)-H(6A)   | 0.9900   |
| C(6)-H(6AB)  | 0.9900   |
| C(7)-C(8)    | 1.542(6) |
| C(7)-H(7A)   | 0.9900   |
| C(7)-H(7AB)  | 0.9900   |
| C(8)-C(11)   | 1.530(6) |
| C(8)-C(9)    | 1.554(5) |
| C(8)-H(8)    | 1.0000   |
| C(10)-H(10A) | 0.9800   |
| C(10)-H(10B) | 0.9800   |
| C(10)-H(10C) | 0.9800   |
| C(11)-H(11A) | 0.9800   |
| C(11)-H(11B) | 0.9800   |
| C(11)-H(11C) | 0.9800   |

|             |          |
|-------------|----------|
| C(12)-C(13) | 1.483(8) |
| C(12)-H(12) | 0.9500   |
| C(13)-C(14) | 1.526(5) |
| C(13)-H(13) | 1.0000   |
| C(14)-C(15) | 1.385(5) |
| C(14)-C(19) | 1.400(5) |
| C(15)-C(16) | 1.398(5) |
| C(15)-H(15) | 0.9500   |
| C(16)-C(17) | 1.379(7) |
| C(16)-H(16) | 0.9500   |
| C(17)-C(18) | 1.375(7) |
| C(17)-H(17) | 0.9500   |
| C(18)-C(19) | 1.382(6) |
| C(18)-H(18) | 0.9500   |
| C(19)-H(19) | 0.9500   |

|                   |          |
|-------------------|----------|
| C(12)-O(2)-C(9)   | 112.5(4) |
| C(1)-N(1)-C(13)   | 119.8(3) |
| C(1)-N(1)-C(9)    | 125.8(3) |
| C(13)-N(1)-C(9)   | 109.3(3) |
| O(1)-C(1)-N(1)    | 121.3(3) |
| O(1)-C(1)-C(2)    | 120.2(4) |
| N(1)-C(1)-C(2)    | 118.5(3) |
| C(1)-C(2)-C(3)    | 116.5(4) |
| C(1)-C(2)-H(2A)   | 108.2    |
| C(3)-C(2)-H(2A)   | 108.2    |
| C(1)-C(2)-H(2AB)  | 108.2    |
| C(3)-C(2)-H(2AB)  | 108.2    |
| H(2A)-C(2)-H(2AB) | 107.3    |
| C(4)-C(3)-C(2)    | 112.1(4) |
| C(4)-C(3)-H(3A)   | 109.2    |
| C(2)-C(3)-H(3A)   | 109.2    |
| C(4)-C(3)-H(3AB)  | 109.2    |
| C(2)-C(3)-H(3AB)  | 109.2    |
| H(3A)-C(3)-H(3AB) | 107.9    |
| C(9)-C(4)-C(3)    | 111.0(4) |

|                   |          |
|-------------------|----------|
| C(9)-C(4)-C(5)    | 108.9(4) |
| C(3)-C(4)-C(5)    | 117.5(4) |
| C(9)-C(4)-H(4)    | 106.3    |
| C(3)-C(4)-H(4)    | 106.3    |
| C(5)-C(4)-H(4)    | 106.3    |
| C(10)-C(5)-C(6)   | 113.9(4) |
| C(10)-C(5)-C(4)   | 112.3(4) |
| C(6)-C(5)-C(4)    | 110.6(4) |
| C(10)-C(5)-H(5)   | 106.5    |
| C(6)-C(5)-H(5)    | 106.5    |
| C(4)-C(5)-H(5)    | 106.5    |
| C(7)-C(6)-C(5)    | 111.2(4) |
| C(7)-C(6)-H(6A)   | 109.4    |
| C(5)-C(6)-H(6A)   | 109.4    |
| C(7)-C(6)-H(6AB)  | 109.4    |
| C(5)-C(6)-H(6AB)  | 109.4    |
| H(6A)-C(6)-H(6AB) | 108.0    |
| C(6)-C(7)-C(8)    | 111.9(4) |
| C(6)-C(7)-H(7A)   | 109.2    |
| C(8)-C(7)-H(7A)   | 109.2    |
| C(6)-C(7)-H(7AB)  | 109.2    |
| C(8)-C(7)-H(7AB)  | 109.2    |
| H(7A)-C(7)-H(7AB) | 107.9    |
| C(11)-C(8)-C(7)   | 111.8(3) |
| C(11)-C(8)-C(9)   | 116.0(3) |
| C(7)-C(8)-C(9)    | 109.3(3) |
| C(11)-C(8)-H(8)   | 106.4    |
| C(7)-C(8)-H(8)    | 106.4    |
| C(9)-C(8)-H(8)    | 106.4    |
| O(2)-C(9)-N(1)    | 102.5(3) |
| O(2)-C(9)-C(4)    | 108.4(4) |
| N(1)-C(9)-C(4)    | 111.3(3) |
| O(2)-C(9)-C(8)    | 107.4(3) |
| N(1)-C(9)-C(8)    | 111.5(3) |
| C(4)-C(9)-C(8)    | 114.9(3) |
| C(5)-C(10)-H(10A) | 109.5    |

|                     |          |
|---------------------|----------|
| C(5)-C(10)-H(10B)   | 109.5    |
| H(10A)-C(10)-H(10B) | 109.5    |
| C(5)-C(10)-H(10C)   | 109.5    |
| H(10A)-C(10)-H(10C) | 109.5    |
| H(10B)-C(10)-H(10C) | 109.5    |
| C(8)-C(11)-H(11A)   | 109.5    |
| C(8)-C(11)-H(11B)   | 109.5    |
| H(11A)-C(11)-H(11B) | 109.5    |
| C(8)-C(11)-H(11C)   | 109.5    |
| H(11A)-C(11)-H(11C) | 109.5    |
| H(11B)-C(11)-H(11C) | 109.5    |
| O(2)-C(12)-C(13)    | 110.1(5) |
| O(2)-C(12)-H(12)    | 125.0    |
| C(13)-C(12)-H(12)   | 125.0    |
| N(1)-C(13)-C(12)    | 102.0(4) |
| N(1)-C(13)-C(14)    | 115.9(3) |
| C(12)-C(13)-C(14)   | 113.6(4) |
| N(1)-C(13)-H(13)    | 108.3    |
| C(12)-C(13)-H(13)   | 108.3    |
| C(14)-C(13)-H(13)   | 108.3    |
| C(15)-C(14)-C(19)   | 119.1(4) |
| C(15)-C(14)-C(13)   | 122.5(3) |
| C(19)-C(14)-C(13)   | 118.4(4) |
| C(14)-C(15)-C(16)   | 120.0(4) |
| C(14)-C(15)-H(15)   | 120.0    |
| C(16)-C(15)-H(15)   | 120.0    |
| C(17)-C(16)-C(15)   | 119.9(4) |
| C(17)-C(16)-H(16)   | 120.0    |
| C(15)-C(16)-H(16)   | 120.0    |
| C(18)-C(17)-C(16)   | 120.5(4) |
| C(18)-C(17)-H(17)   | 119.7    |
| C(16)-C(17)-H(17)   | 119.7    |
| C(17)-C(18)-C(19)   | 120.0(4) |
| C(17)-C(18)-H(18)   | 120.0    |
| C(19)-C(18)-H(18)   | 120.0    |
| C(18)-C(19)-C(14)   | 120.5(4) |

C(18)-C(19)-H(19)      119.7

C(14)-C(19)-H(19)      119.7

---

Symmetry transformations used to generate equivalent atoms:



Table 4. Anisotropic displacement parameters ( $\text{\AA}^2 \times 10^3$ ) for D59ZB65\_0m\_a. The anisotropic displacement factor exponent takes the form:  $-2\pi^2 [ h^2 a^{*2} U^{11} + \dots + 2 h k a^* b^* U^{12} ]$

|       | U <sup>11</sup> | U <sup>22</sup> | U <sup>33</sup> | U <sup>23</sup> | U <sup>13</sup> | U <sup>12</sup> |
|-------|-----------------|-----------------|-----------------|-----------------|-----------------|-----------------|
| O(1)  | 26(1)           | 41(2)           | 29(1)           | 2(1)            | 9(1)            | -8(1)           |
| O(2)  | 32(2)           | 32(2)           | 122(3)          | -21(2)          | 18(2)           | -5(2)           |
| N(1)  | 22(1)           | 30(2)           | 22(1)           | 0(1)            | 6(1)            | 1(1)            |
| C(1)  | 22(2)           | 33(2)           | 21(2)           | 5(2)            | 6(1)            | 4(2)            |
| C(2)  | 30(2)           | 52(3)           | 25(2)           | -3(2)           | 11(2)           | 0(2)            |
| C(3)  | 25(2)           | 92(4)           | 18(2)           | 6(2)            | 9(2)            | -3(2)           |
| C(4)  | 25(2)           | 54(3)           | 36(2)           | 17(2)           | -1(2)           | -4(2)           |
| C(5)  | 35(2)           | 70(4)           | 51(3)           | 25(3)           | 0(2)            | -15(3)          |
| C(6)  | 34(2)           | 76(4)           | 45(3)           | 16(3)           | 8(2)            | -16(2)          |
| C(7)  | 24(2)           | 51(3)           | 39(2)           | 2(2)            | 3(2)            | -5(2)           |
| C(8)  | 23(2)           | 40(2)           | 22(2)           | -1(2)           | 4(1)            | 2(2)            |
| C(9)  | 23(2)           | 30(2)           | 38(2)           | 2(2)            | 4(2)            | -2(2)           |
| C(10) | 38(3)           | 93(5)           | 78(4)           | 50(4)           | 19(3)           | -9(3)           |
| C(11) | 28(2)           | 45(2)           | 25(2)           | 6(2)            | 10(1)           | 8(2)            |
| C(12) | 206(9)          | 34(3)           | 119(6)          | 19(3)           | 136(6)          | 25(4)           |
| C(13) | 35(2)           | 31(2)           | 28(2)           | 2(2)            | 8(2)            | 12(2)           |
| C(14) | 20(2)           | 31(2)           | 27(2)           | -4(2)           | 8(1)            | -4(2)           |
| C(15) | 27(2)           | 32(2)           | 30(2)           | 2(2)            | 14(2)           | 0(2)            |
| C(16) | 33(2)           | 45(3)           | 40(2)           | 17(2)           | 19(2)           | 7(2)            |
| C(17) | 36(2)           | 76(4)           | 32(2)           | 18(2)           | 17(2)           | 4(3)            |
| C(18) | 34(2)           | 63(3)           | 32(2)           | -8(2)           | 17(2)           | -1(2)           |
| C(19) | 27(2)           | 39(2)           | 36(2)           | -5(2)           | 10(2)           | -2(2)           |

Table 5. Hydrogen coordinates ( $\times 10^4$ ) and isotropic displacement parameters ( $\text{\AA}^2 \times 10^{-3}$ ) for D59ZB65\_0m\_a.

|        | x    | y    | z     | U(eq) |
|--------|------|------|-------|-------|
| H(2A)  | 6773 | 8792 | 9473  | 43    |
| H(2AB) | 7271 | 7039 | 10239 | 43    |
| H(3A)  | 6434 | 5673 | 10416 | 54    |
| H(3AB) | 5956 | 6681 | 9144  | 54    |
| H(4)   | 6717 | 3059 | 9345  | 51    |
| H(5)   | 5865 | 857  | 8572  | 69    |
| H(6A)  | 4821 | 1978 | 8110  | 65    |
| H(6AB) | 5057 | 4383 | 8383  | 65    |
| H(7A)  | 4647 | 3748 | 6266  | 49    |
| H(7AB) | 5123 | 1818 | 6466  | 49    |
| H(8)   | 5546 | 4584 | 5833  | 36    |
| H(10A) | 5594 | 555  | 10178 | 106   |
| H(10B) | 5763 | 2982 | 10557 | 106   |
| H(10C) | 6306 | 1329 | 10695 | 106   |
| H(11A) | 5752 | 7986 | 6921  | 50    |
| H(11B) | 5260 | 7233 | 7462  | 50    |
| H(11C) | 5042 | 7503 | 6005  | 50    |
| H(12)  | 6958 | 1127 | 6396  | 116   |
| H(13)  | 7445 | 4614 | 7129  | 40    |
| H(15)  | 6319 | 8090 | 5679  | 35    |
| H(16)  | 6056 | 9536 | 3706  | 46    |
| H(17)  | 6311 | 7724 | 2264  | 56    |
| H(18)  | 6869 | 4571 | 2794  | 50    |
| H(19)  | 7169 | 3185 | 4772  | 42    |

|     |      |     |     |     |     |   |
|-----|------|-----|-----|-----|-----|---|
| C4  | - C3 | C5  | C9  | H4  | sp3 | S |
| C5  | - C4 | C6  | C10 | H5  | sp3 | S |
| C8  | - C7 | C9  | C11 | H8  | sp3 | R |
| C9  | - O2 | N1  | C4  | C8  | sp3 | S |
| C13 | - N1 | C12 | C14 | H13 | sp3 | R |

Crystallographic data for compound **9d**:

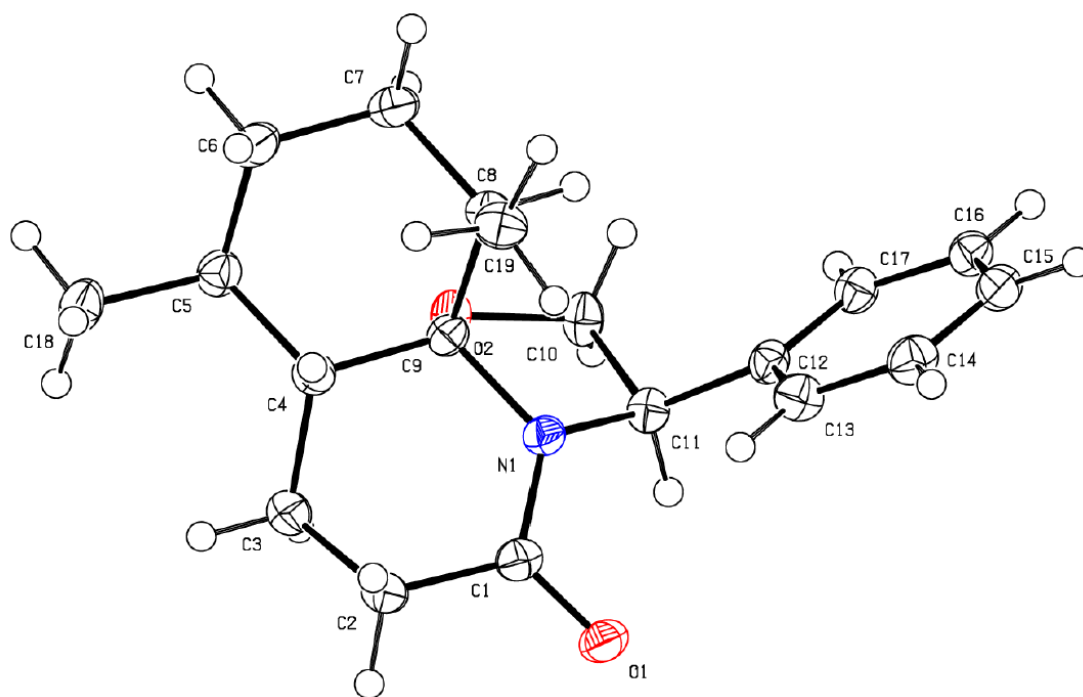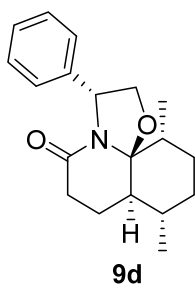

Table 1. Crystal data and structure refinement for **9d** (I59ZB79\_0m\_a).

|                                   |                                                  |                  |
|-----------------------------------|--------------------------------------------------|------------------|
| Identification code               | I59ZB79_0m_a                                     |                  |
| Empirical formula                 | C <sub>19</sub> H <sub>25</sub> N O <sub>2</sub> |                  |
| Formula weight                    | 299.40                                           |                  |
| Temperature                       | 100(2) K                                         |                  |
| Wavelength                        | 0.71073 Å                                        |                  |
| Crystal system                    | Monoclinic                                       |                  |
| Space group                       | P 21                                             |                  |
| Unit cell dimensions              | a = 8.0011(14) Å                                 | α = 90°.         |
|                                   | b = 11.0886(15) Å                                | β = 105.404(7)°. |
|                                   | c = 9.5396(17) Å                                 | γ = 90°.         |
| Volume                            | 816.0(2) Å <sup>3</sup>                          |                  |
| Z                                 | 2                                                |                  |
| Density (calculated)              | 1.219 Mg/m <sup>3</sup>                          |                  |
| Absorption coefficient            | 0.078 mm <sup>-1</sup>                           |                  |
| F(000)                            | 324                                              |                  |
| Crystal size                      | 0.200 x 0.080 x 0.040 mm <sup>3</sup>            |                  |
| Theta range for data collection   | 2.214 to 30.538°.                                |                  |
| Index ranges                      | -11 ≤ h ≤ 11, -15 ≤ k ≤ 15, -13 ≤ l ≤ 13         |                  |
| Reflections collected             | 16724                                            |                  |
| Independent reflections           | 4969 [R(int) = 0.0605]                           |                  |
| Completeness to theta = 25.242°   | 99.8 %                                           |                  |
| Absorption correction             | Semi-empirical from equivalents                  |                  |
| Max. and min. transmission        | 0.7461 and 0.6879                                |                  |
| Refinement method                 | Full-matrix least-squares on F <sup>2</sup>      |                  |
| Data / restraints / parameters    | 4969 / 1 / 201                                   |                  |
| Goodness-of-fit on F <sup>2</sup> | 1.112                                            |                  |
| Final R indices [I > 2σ(I)]       | R1 = 0.0471, wR2 = 0.0907                        |                  |
| R indices (all data)              | R1 = 0.0929, wR2 = 0.1228                        |                  |
| Absolute structure parameter      | -0.1(7)                                          |                  |
| Extinction coefficient            | n/a                                              |                  |
| Largest diff. peak and hole       | 0.261 and -0.305 e.Å <sup>-3</sup>               |                  |

Table 2. Atomic coordinates ( $\times 10^4$ ) and equivalent isotropic displacement parameters ( $\text{\AA}^2 \times 10^3$ ) for I59ZB79\_0m\_a.  $U(\text{eq})$  is defined as one third of the trace of the orthogonalized  $U^{ij}$  tensor.

|       | x       | y       | z        | $U(\text{eq})$ |
|-------|---------|---------|----------|----------------|
| O(1)  | 1415(3) | 3048(2) | 5026(2)  | 26(1)          |
| O(2)  | 3243(3) | 6077(2) | 7645(2)  | 22(1)          |
| N(1)  | 3115(3) | 4644(2) | 5950(3)  | 20(1)          |
| C(1)  | 2638(4) | 3457(3) | 5978(3)  | 22(1)          |
| C(2)  | 3613(4) | 2703(3) | 7237(3)  | 25(1)          |
| C(3)  | 4158(4) | 3449(3) | 8627(3)  | 25(1)          |
| C(4)  | 5329(4) | 4459(2) | 8371(3)  | 22(1)          |
| C(5)  | 6262(4) | 5248(3) | 9669(3)  | 24(1)          |
| C(6)  | 7530(4) | 6070(3) | 9177(3)  | 28(1)          |
| C(7)  | 6711(4) | 6805(3) | 7810(3)  | 27(1)          |
| C(8)  | 5655(4) | 6029(3) | 6545(3)  | 22(1)          |
| C(9)  | 4362(4) | 5274(2) | 7129(3)  | 20(1)          |
| C(10) | 2002(4) | 6533(3) | 6380(3)  | 25(1)          |
| C(11) | 1782(4) | 5515(3) | 5218(3)  | 21(1)          |
| C(12) | 1912(4) | 5904(3) | 3731(3)  | 21(1)          |
| C(13) | 2604(4) | 5111(3) | 2893(3)  | 26(1)          |
| C(14) | 2639(4) | 5422(3) | 1495(3)  | 28(1)          |
| C(15) | 1977(4) | 6522(3) | 903(3)   | 27(1)          |
| C(16) | 1274(4) | 7306(3) | 1726(3)  | 24(1)          |
| C(17) | 1242(4) | 7000(3) | 3133(3)  | 22(1)          |
| C(18) | 7218(5) | 4505(3) | 10989(3) | 31(1)          |
| C(19) | 6797(4) | 5269(3) | 5833(3)  | 27(1)          |

Table 3. Bond lengths [Å] and angles [°] for I59ZB79\_0m\_a.

---

|              |          |
|--------------|----------|
| O(1)-C(1)    | 1.231(3) |
| O(2)-C(10)   | 1.436(3) |
| O(2)-C(9)    | 1.439(3) |
| N(1)-C(1)    | 1.373(4) |
| N(1)-C(9)    | 1.467(4) |
| N(1)-C(11)   | 1.470(4) |
| C(1)-C(2)    | 1.501(4) |
| C(2)-C(3)    | 1.524(4) |
| C(2)-H(2A)   | 0.9900   |
| C(2)-H(2AB)  | 0.9900   |
| C(3)-C(4)    | 1.521(4) |
| C(3)-H(3A)   | 0.9900   |
| C(3)-H(3AB)  | 0.9900   |
| C(4)-C(9)    | 1.528(4) |
| C(4)-C(5)    | 1.538(4) |
| C(4)-H(4)    | 1.0000   |
| C(5)-C(6)    | 1.528(4) |
| C(5)-C(18)   | 1.529(4) |
| C(5)-H(5)    | 1.0000   |
| C(6)-C(7)    | 1.530(4) |
| C(6)-H(6A)   | 0.9900   |
| C(6)-H(6AB)  | 0.9900   |
| C(7)-C(8)    | 1.539(4) |
| C(7)-H(7A)   | 0.9900   |
| C(7)-H(7AB)  | 0.9900   |
| C(8)-C(19)   | 1.528(4) |
| C(8)-C(9)    | 1.545(4) |
| C(8)-H(8)    | 1.0000   |
| C(10)-C(11)  | 1.559(4) |
| C(10)-H(10A) | 0.9900   |
| C(10)-H(10B) | 0.9900   |
| C(11)-C(12)  | 1.512(4) |
| C(11)-H(11)  | 1.0000   |
| C(12)-C(17)  | 1.388(4) |

|                   |          |
|-------------------|----------|
| C(12)-C(13)       | 1.398(4) |
| C(13)-C(14)       | 1.384(4) |
| C(13)-H(13)       | 0.9500   |
| C(14)-C(15)       | 1.389(5) |
| C(14)-H(14)       | 0.9500   |
| C(15)-C(16)       | 1.387(4) |
| C(15)-H(15)       | 0.9500   |
| C(16)-C(17)       | 1.391(4) |
| C(16)-H(16)       | 0.9500   |
| C(17)-H(17)       | 0.9500   |
| C(18)-H(18A)      | 0.9800   |
| C(18)-H(18B)      | 0.9800   |
| C(18)-H(18C)      | 0.9800   |
| C(19)-H(19A)      | 0.9800   |
| C(19)-H(19B)      | 0.9800   |
| C(19)-H(19C)      | 0.9800   |
|                   |          |
| C(10)-O(2)-C(9)   | 106.5(2) |
| C(1)-N(1)-C(9)    | 125.3(2) |
| C(1)-N(1)-C(11)   | 118.0(2) |
| C(9)-N(1)-C(11)   | 108.1(2) |
| O(1)-C(1)-N(1)    | 120.6(3) |
| O(1)-C(1)-C(2)    | 121.9(3) |
| N(1)-C(1)-C(2)    | 117.5(2) |
| C(1)-C(2)-C(3)    | 111.2(2) |
| C(1)-C(2)-H(2A)   | 109.4    |
| C(3)-C(2)-H(2A)   | 109.4    |
| C(1)-C(2)-H(2AB)  | 109.4    |
| C(3)-C(2)-H(2AB)  | 109.4    |
| H(2A)-C(2)-H(2AB) | 108.0    |
| C(4)-C(3)-C(2)    | 107.8(2) |
| C(4)-C(3)-H(3A)   | 110.1    |
| C(2)-C(3)-H(3A)   | 110.1    |
| C(4)-C(3)-H(3AB)  | 110.1    |
| C(2)-C(3)-H(3AB)  | 110.1    |
| H(3A)-C(3)-H(3AB) | 108.5    |



|                   |          |
|-------------------|----------|
| C(3)-C(4)-C(9)    | 110.7(2) |
| C(3)-C(4)-C(5)    | 118.6(2) |
| C(9)-C(4)-C(5)    | 109.0(2) |
| C(3)-C(4)-H(4)    | 105.9    |
| C(9)-C(4)-H(4)    | 105.9    |
| C(5)-C(4)-H(4)    | 105.9    |
| C(6)-C(5)-C(18)   | 110.3(3) |
| C(6)-C(5)-C(4)    | 108.2(2) |
| C(18)-C(5)-C(4)   | 112.7(2) |
| C(6)-C(5)-H(5)    | 108.5    |
| C(18)-C(5)-H(5)   | 108.5    |
| C(4)-C(5)-H(5)    | 108.5    |
| C(5)-C(6)-C(7)    | 114.3(2) |
| C(5)-C(6)-H(6A)   | 108.7    |
| C(7)-C(6)-H(6A)   | 108.7    |
| C(5)-C(6)-H(6AB)  | 108.7    |
| C(7)-C(6)-H(6AB)  | 108.7    |
| H(6A)-C(6)-H(6AB) | 107.6    |
| C(6)-C(7)-C(8)    | 113.1(2) |
| C(6)-C(7)-H(7A)   | 109.0    |
| C(8)-C(7)-H(7A)   | 109.0    |
| C(6)-C(7)-H(7AB)  | 109.0    |
| C(8)-C(7)-H(7AB)  | 109.0    |
| H(7A)-C(7)-H(7AB) | 107.8    |
| C(19)-C(8)-C(7)   | 112.8(3) |
| C(19)-C(8)-C(9)   | 113.4(2) |
| C(7)-C(8)-C(9)    | 107.5(2) |
| C(19)-C(8)-H(8)   | 107.6    |
| C(7)-C(8)-H(8)    | 107.6    |
| C(9)-C(8)-H(8)    | 107.6    |
| O(2)-C(9)-N(1)    | 101.5(2) |
| O(2)-C(9)-C(4)    | 109.5(2) |
| N(1)-C(9)-C(4)    | 114.5(2) |
| O(2)-C(9)-C(8)    | 109.0(2) |
| N(1)-C(9)-C(8)    | 111.5(2) |
| C(4)-C(9)-C(8)    | 110.5(2) |

|                     |          |
|---------------------|----------|
| O(2)-C(10)-C(11)    | 105.4(2) |
| O(2)-C(10)-H(10A)   | 110.7    |
| C(11)-C(10)-H(10A)  | 110.7    |
| O(2)-C(10)-H(10B)   | 110.7    |
| C(11)-C(10)-H(10B)  | 110.7    |
| H(10A)-C(10)-H(10B) | 108.8    |
| N(1)-C(11)-C(12)    | 114.2(2) |
| N(1)-C(11)-C(10)    | 102.0(2) |
| C(12)-C(11)-C(10)   | 116.0(2) |
| N(1)-C(11)-H(11)    | 108.1    |
| C(12)-C(11)-H(11)   | 108.1    |
| C(10)-C(11)-H(11)   | 108.1    |
| C(17)-C(12)-C(13)   | 118.9(3) |
| C(17)-C(12)-C(11)   | 121.3(3) |
| C(13)-C(12)-C(11)   | 119.6(3) |
| C(14)-C(13)-C(12)   | 120.5(3) |
| C(14)-C(13)-H(13)   | 119.8    |
| C(12)-C(13)-H(13)   | 119.8    |
| C(13)-C(14)-C(15)   | 120.4(3) |
| C(13)-C(14)-H(14)   | 119.8    |
| C(15)-C(14)-H(14)   | 119.8    |
| C(16)-C(15)-C(14)   | 119.3(3) |
| C(16)-C(15)-H(15)   | 120.3    |
| C(14)-C(15)-H(15)   | 120.3    |
| C(15)-C(16)-C(17)   | 120.4(3) |
| C(15)-C(16)-H(16)   | 119.8    |
| C(17)-C(16)-H(16)   | 119.8    |
| C(12)-C(17)-C(16)   | 120.4(3) |
| C(12)-C(17)-H(17)   | 119.8    |
| C(16)-C(17)-H(17)   | 119.8    |
| C(5)-C(18)-H(18A)   | 109.5    |
| C(5)-C(18)-H(18B)   | 109.5    |
| H(18A)-C(18)-H(18B) | 109.5    |
| C(5)-C(18)-H(18C)   | 109.5    |
| H(18A)-C(18)-H(18C) | 109.5    |
| H(18B)-C(18)-H(18C) | 109.5    |

|                     |       |
|---------------------|-------|
| C(8)-C(19)-H(19A)   | 109.5 |
| C(8)-C(19)-H(19B)   | 109.5 |
| H(19A)-C(19)-H(19B) | 109.5 |
| C(8)-C(19)-H(19C)   | 109.5 |
| H(19A)-C(19)-H(19C) | 109.5 |
| H(19B)-C(19)-H(19C) | 109.5 |

---

Symmetry transformations used to generate equivalent atoms:

Table 4. Anisotropic displacement parameters ( $\text{\AA}^2 \times 10^3$ ) for I59ZB79\_0m\_a. The anisotropic displacement factor exponent takes the form:  $-2\pi^2 [ h^2 a^{*2}U^{11} + \dots + 2 h k a^* b^* U^{12} ]$

|       | U <sup>11</sup> | U <sup>22</sup> | U <sup>33</sup> | U <sup>23</sup> | U <sup>13</sup> | U <sup>12</sup> |
|-------|-----------------|-----------------|-----------------|-----------------|-----------------|-----------------|
| O(1)  | 25(1)           | 29(1)           | 25(1)           | -4(1)           | 6(1)            | -8(1)           |
| O(2)  | 23(1)           | 25(1)           | 18(1)           | -1(1)           | 5(1)            | 5(1)            |
| N(1)  | 18(1)           | 21(1)           | 20(1)           | 0(1)            | 5(1)            | -2(1)           |
| C(1)  | 22(1)           | 24(1)           | 21(1)           | -4(1)           | 9(1)            | -3(1)           |
| C(2)  | 28(2)           | 21(1)           | 25(2)           | 1(1)            | 7(1)            | -4(1)           |
| C(3)  | 28(2)           | 25(1)           | 23(2)           | 2(1)            | 7(1)            | -2(1)           |
| C(4)  | 22(1)           | 21(1)           | 22(1)           | 0(1)            | 6(1)            | 1(1)            |
| C(5)  | 26(2)           | 22(1)           | 23(1)           | -2(1)           | 4(1)            | 2(1)            |
| C(6)  | 24(2)           | 25(2)           | 31(2)           | -4(1)           | 1(1)            | -2(1)           |
| C(7)  | 24(2)           | 24(2)           | 31(2)           | -2(1)           | 5(1)            | -5(1)           |
| C(8)  | 21(1)           | 20(1)           | 25(1)           | 0(1)            | 6(1)            | -2(1)           |
| C(9)  | 20(1)           | 20(1)           | 19(1)           | -2(1)           | 5(1)            | 0(1)            |
| C(10) | 27(2)           | 28(2)           | 19(1)           | -1(1)           | 4(1)            | 6(1)            |
| C(11) | 19(1)           | 24(1)           | 21(1)           | 0(1)            | 6(1)            | 2(1)            |
| C(12) | 18(1)           | 27(1)           | 19(1)           | 0(1)            | 4(1)            | -2(1)           |
| C(13) | 29(2)           | 24(1)           | 26(2)           | -3(1)           | 11(1)           | 0(1)            |
| C(14) | 30(2)           | 32(2)           | 25(2)           | -6(1)           | 10(1)           | -4(1)           |
| C(15) | 26(2)           | 35(2)           | 21(1)           | 0(1)            | 7(1)            | -8(1)           |
| C(16) | 20(1)           | 28(2)           | 24(2)           | 2(1)            | 4(1)            | -2(1)           |
| C(17) | 19(1)           | 26(1)           | 22(1)           | -1(1)           | 5(1)            | 1(1)            |
| C(18) | 35(2)           | 30(2)           | 24(2)           | -5(1)           | -1(1)           | 3(1)            |
| C(19) | 25(2)           | 27(2)           | 32(2)           | 0(1)            | 12(1)           | -1(1)           |

Table 5. Hydrogen coordinates ( $\times 10^4$ ) and isotropic displacement parameters ( $\text{\AA}^2 \times 10^{-3}$ ) for I59ZB79\_0m\_a.

|        | x    | y    | z     | U(eq) |
|--------|------|------|-------|-------|
| H(2A)  | 4656 | 2359 | 7016  | 29    |
| H(2AB) | 2871 | 2026 | 7384  | 29    |
| H(3A)  | 3124 | 3789 | 8867  | 30    |
| H(3AB) | 4787 | 2936 | 9448  | 30    |
| H(4)   | 6264 | 4058 | 8023  | 26    |
| H(5)   | 5381 | 5763 | 9956  | 29    |
| H(6A)  | 8473 | 5569 | 8991  | 34    |
| H(6AB) | 8058 | 6632 | 9978  | 34    |
| H(7A)  | 7640 | 7227 | 7494  | 32    |
| H(7AB) | 5942 | 7426 | 8050  | 32    |
| H(8)   | 4965 | 6589 | 5788  | 26    |
| H(10A) | 2433 | 7282 | 6032  | 30    |
| H(10B) | 884  | 6707 | 6599  | 30    |
| H(11)  | 620  | 5134 | 5103  | 25    |
| H(13)  | 3054 | 4354 | 3285  | 31    |
| H(14)  | 3119 | 4878 | 937   | 34    |
| H(15)  | 2004 | 6734 | -55   | 33    |
| H(16)  | 811  | 8058 | 1326  | 29    |
| H(17)  | 759  | 7544 | 3688  | 27    |
| H(18A) | 8007 | 3938 | 10701 | 47    |
| H(18B) | 6376 | 4055 | 11365 | 47    |
| H(18C) | 7885 | 5044 | 11747 | 47    |
| H(19A) | 6068 | 4715 | 5129  | 40    |
| H(19B) | 7623 | 4804 | 6581  | 40    |
| H(19C) | 7432 | 5799 | 5333  | 40    |

|     |      |     |     |     |     |   |
|-----|------|-----|-----|-----|-----|---|
| C4  | - C3 | C5  | C9  | H4  | sp3 | R |
| C5  | - C4 | C6  | C18 | H5  | sp3 | S |
| C8  | - C7 | C9  | C19 | H8  | sp3 | R |
| C9  | - O2 | N1  | C4  | C8  | sp3 | S |
| C11 | - N1 | C10 | C12 | H11 | sp3 | R |
